# Supplementary material for: Glial multicellular programs reveal distinct patient stratification in Parkinson's disease
Source: Research Square preprint supplement (doi:10.21203/rs.3.rs-9520754/v1), 2026-04-30
Supplement: Supplementary file 1 [file 595c8e4f43c0465d88e42357.xlsx]

## Sheet: Extended_Data_Table_1
Unnamed: 0	Biobank Provider	Sex of Donor	Brain area	Number of samples	Age of Donor	Number
0	MADRC	male	Caudate	21	63 – 88	57815
1	MADRC	male	Putamen	26	59 – 88	58247
2	MADRC	female	Caudate	7	58 – 81	16370
3	MADRC	female	Putamen	7	58 – 81	12729
4	NIH	male	Caudate	10	25 – 90	15620
5	NIH	male	Putamen	11	25 – 90	12175
6	NIH	female	Caudate	0		0
7	NIH	female	Putamen	0		0
8	PUKBB	male	Caudate	10	58 – 90	19098
9	PUKBB	male	Putamen	12	58 – 90	31100
10	PUKBB	female	Caudate	9	61 – 89	19152
11	PUKBB	female	Putamen	10	61 – 89	24463

## Sheet: Extended_Data_Table_2
Population	Region	Unnamed: 2	Unnamed: 3	Unnamed: 4
	Caudate		Putamen
	Condition
	Control	PD	Control	PD
Oligodendrocytes	0.497	0.529	0.608	0.604
Astrocytes	0.184	0.187	0.167	0.098
OPCs	0.143	0.118	0.114	0.146
Microglia	0.082	0.088	0.072	0.112
Ependymal Cells	0.056	0.042	-	-
Vascular Cells	0.017	0.01	0.009	0.011
Fibroblasts	0.184	0.011	0.006	0.007
Perivascular Macrophages	0.008	0.012	0.008	0.014
Lymphocytes	0.003	0.004	0.003	0.006

## Sheet: Extended_Data_Table_3_A0_marker
names	scores	logfoldchanges	pvals	pvals_adj	pct_nz_group	A0 vs:	weighted_expr_AR1	weighted_expr_ARPs	weighted_expr_A0	weighted_expr_SVZCs	weighted_expr_WMAs	weighted_expr_AR2
CABLES1	101.374	6.05599	0	0	0.0882711	SVZCs	2.60167	0.407327	2.47521	0.151512	2.33226	2.07489
WIF1	56.4164	5.77693	0	0	0.0199234	ARPs	0.912277	0.0271199	0.919234	0.0723141	0.0342559	0.51746
NRP1	50.7886	5.52678	0	0	0.0174513	SVZCs	0.317863	0.16881	0.680737	0.020935	0.0786286	1.30623
GRM3	93.0942	5.44902	0	0	0.0949675	SVZCs	1.94749	0.176246	1.90596	0.12317	0.272449	1.2617
WIF1	33.3558	5.43475	5.99638e-244	8.32058e-241	0.0317209	WMAs	0.912277	0.0271199	0.919234	0.0723141	0.0342559	0.51746
ARHGAP24	80.8082	5.17613	0	0	0.0793425	SVZCs	1.43493	0.34167	1.64406	0.109308	0.883161	1.56733
AC068308.1	60.2193	5.01101	0	0	0.0431673	ARPs	1.24841	0.0625002	1.12481	0.0823496	0.161604	0.630698
CXCL14	36.381	5.00058	8.51755e-290	6.87149e-288	0.0115666	SVZCs	0.319721	0.0568206	0.380834	0.0143749	0.0952953	0.439939
GRID2	84.2354	4.96291	0	0	0.188515	SVZCs	2.25906	0.682851	2.43339	0.28772	2.25762	1.90409
GRM3	82.3271	4.89283	0	0	0.122095	ARPs	1.94749	0.176246	1.90596	0.12317	0.272449	1.2617
POU3F1	11.9051	4.7925	1.11284e-32	1.50505e-31	0.0036526	SVZCs	0.126736	0.0127813	0.104698	0.00397485	0.0475902	0.0835608
TMEM132C	76.8997	4.73367	0	0	0.0752841	SVZCs	1.114	0.138313	1.44668	0.115216	0.131522	0.998202
ZNF676	11.9548	4.66759	6.12972e-33	8.33555e-32	0.00507305	SVZCs	0.174671	0.0134271	0.121697	0.00507906	0.028121	0.138024
AC068308.1	65.065	4.59862	0	0	0.0578328	SVZCs	1.24841	0.0625002	1.12481	0.0823496	0.161604	0.630698
GJB6	39.0725	4.59784	0	0	0.0184659	SVZCs	0.525419	0.0325059	0.391214	0.0195787	0.27309	0.259212
DIO3OS	17.1562	4.54547	5.64569e-66	1.28763e-64	0.00649351	SVZCs	0.157901	0.0233482	0.166894	0.00774781	0.0484244	0.37005
TMEM132C	41.203	4.5307	0	0	0.0872324	WMAs	1.114	0.138313	1.44668	0.115216	0.131522	0.998202
TMPRSS3	12.8127	4.49715	1.39212e-37	2.09968e-36	0.00507305	SVZCs	0.12778	0.00997254	0.108021	0.00503855	0.0564837	0.208995
LINC01727	10.4843	4.45827	1.01959e-25	1.17507e-24	0.00669643	SVZCs	0.0795913	0.0141685	0.135993	0.00660499	0.246466	0.0643033
TMEM132C	68.7122	4.45306	0	0	0.0888889	ARPs	1.114	0.138313	1.44668	0.115216	0.131522	0.998202
SEL1L3	47.1891	4.44539	0	0	0.028612	SVZCs	1.04101	0.0411628	0.561565	0.0339966	0.0495617	0.572198
CABLES1	83.8716	4.43612	0	0	0.204598	ARPs	2.60167	0.407327	2.47521	0.151512	2.33226	2.07489
SLC13A5	18.6291	4.32986	1.86782e-77	4.81387e-76	0.00892857	SVZCs	0.132679	0.0116653	0.174039	0.0094086	0.0857841	0.171602
WIF1	58.9468	4.32913	0	0	0.0499188	SVZCs	0.912277	0.0271199	0.919234	0.0723141	0.0342559	0.51746
AC005009.2	25.1404	4.31578	1.7975e-139	7.3273e-138	0.0135958	SVZCs	0.376669	0.018616	0.259939	0.014796	0.0478368	0.224867
FGL1	21.9101	4.31455	2.08164e-106	6.72993e-105	0.012987	SVZCs	0.240879	0.020279	0.237646	0.0133917	0.0275411	0.0748653
AC097518.2	67.2743	4.28373	0	0	0.100383	ARPs	1.18161	0.170597	1.53105	0.442181	0.910018	0.754396
TMEM100	7.83267	4.25806	4.77606e-15	3.22275e-14	0.00408685	ARPs	0.182345	0.00402199	0.0742827	0.00608438	0.0786398	0.0173617
ZNF98	69.3962	4.2222	0	0	0.118101	SVZCs	1.60289	0.565627	1.64436	0.20199	0.691382	1.43473
GRM3	47.0574	4.19245	0	0	0.18636	WMAs	1.94749	0.176246	1.90596	0.12317	0.272449	1.2617
SEL1L3	42.2793	4.16424	0	0	0.0339719	ARPs	1.04101	0.0411628	0.561565	0.0339966	0.0495617	0.572198
SLIT1	48.8489	4.08813	0	0	0.0444399	SVZCs	0.822204	0.0574507	0.660194	0.053526	0.175799	0.799394
AC078842.2	7.79556	4.0502	6.41247e-15	5.02595e-14	0.00426136	SVZCs	0.0576932	0.00649693	0.0743124	0.00464577	0.012736	0.114773
RANBP17	17.9644	4.03943	3.70294e-72	9.02706e-71	0.0150162	SVZCs	0.1685	0.0235174	0.228987	0.0155281	0.0780137	0.286102
RERG	47.4016	4.03937	0	0	0.0546616	ARPs	0.606992	0.0715563	0.797368	0.0811374	0.0910406	0.528704
SLC13A5	16.7882	4.01806	2.97826e-63	6.80157e-62	0.00996169	ARPs	0.132679	0.0116653	0.174039	0.0094086	0.0857841	0.171602
SLIT1	44.1026	3.98319	0	0	0.0464879	ARPs	0.822204	0.0574507	0.660194	0.053526	0.175799	0.799394
AC005009.2	22.5006	3.98167	4.09281e-112	1.79267e-110	0.0166028	ARPs	0.376669	0.018616	0.259939	0.014796	0.0478368	0.224867
AL121894.3	9.93773	3.97997	2.85249e-23	3.05788e-22	0.00527597	SVZCs	0.0835208	0.00993702	0.0768022	0.00504628	0.0280607	0.0311283
HES5	14.2067	3.97074	8.32857e-46	1.46585e-44	0.0107549	SVZCs	0.0381997	0.0134897	0.175743	0.0121798	0.0528545	0.0444508
KCNQ3	49.2239	3.9634	0	0	0.0582386	SVZCs	0.652405	0.131043	0.810665	0.0770479	0.372132	1.26274
AC007402.1	28.7312	3.93257	1.55483e-181	8.01442e-180	0.0351055	SVZCs	0.210015	0.0689112	0.501857	0.0417998	0.204287	0.294032
TRIM29	8.55055	3.91842	1.22508e-17	9.08857e-17	0.00613027	ARPs	0.0905467	0.00559146	0.0813788	0.00606288	0.00708122	0.0705863
SEL1L3	24.7751	3.89025	1.66221e-135	7.29898e-133	0.0444092	WMAs	1.04101	0.0411628	0.561565	0.0339966	0.0495617	0.572198
TRIB1	15.7896	3.87654	3.67047e-56	7.52978e-55	0.00913149	SVZCs	0.12502	0.0174577	0.136393	0.00990005	0.0329131	0.0861457
GABRA4	47.185	3.87639	0	0	0.0409903	SVZCs	0.64525	0.0565746	0.605828	0.0551546	0.0813952	0.847045
GJB6	34.5231	3.85706	3.60803e-261	4.28639e-259	0.0260536	ARPs	0.525419	0.0325059	0.391214	0.0195787	0.27309	0.259212
LINC00645	17.5374	3.85145	7.43096e-69	1.85854e-67	0.0153257	ARPs	0.378589	0.0197264	0.252754	0.0296441	0.279348	0.0892893
RERG	51.5767	3.85108	0	0	0.0590503	SVZCs	0.606992	0.0715563	0.797368	0.0811374	0.0910406	0.528704
AL133330.2	6.85478	3.84356	7.14214e-12	4.8476e-11	0.00507305	SVZCs	0.0456576	0.00597839	0.0610991	0.00437917	0.0129814	0.0600782
GABRA4	42.7608	3.83869	0	0	0.0416347	ARPs	0.64525	0.0565746	0.605828	0.0551546	0.0813952	0.847045
DIO2	22.0406	3.83263	1.17663e-107	3.84344e-106	0.0146104	SVZCs	0.114076	0.0604178	0.247276	0.0194986	0.145457	0.236259
HES5	12.9635	3.82242	1.9704e-38	2.67214e-37	0.00970626	ARPs	0.0381997	0.0134897	0.175743	0.0121798	0.0528545	0.0444508
LINC00499	70.8095	3.81447	0	0	0.201705	SVZCs	2.10579	0.631415	2.20259	0.452389	1.10097	1.21809
TRIM29	9.4594	3.8013	3.09729e-21	3.09997e-20	0.00568182	SVZCs	0.0905467	0.00559146	0.0813788	0.00606288	0.00708122	0.0705863
OAF	61.1792	3.78215	0	0	0.0775162	SVZCs	0.744673	0.148589	0.788908	0.0836946	0.146769	0.760776
SLC7A10	29.452	3.7651	1.18654e-190	6.41141e-189	0.0213068	SVZCs	0.256129	0.0469876	0.278849	0.0233794	0.182818	0.197936
LINC00839	10.6495	3.75055	1.75379e-26	2.06374e-25	0.00588474	SVZCs	0.1497	0.0072898	0.0930082	0.00721569	0.00284552	0.0855961
TMEM241	69.2922	3.75024	0	0	0.123377	SVZCs	1.39093	0.202638	1.17248	0.153337	0.778983	1.22707
ADGRV1	46.4189	3.74262	0	0	0.549564	WMAs	4.2535	2.81577	4.18414	2.87645	1.76282	4.02428
AC018541.1	7.98458	3.7366	1.40997e-15	1.13908e-14	0.00568182	SVZCs	0.035652	0.0109917	0.0722425	0.00560439	0.0324669	0.0153801
LINC00839	9.5557	3.73576	1.2275e-21	1.04138e-20	0.00715198	ARPs	0.1497	0.0072898	0.0930082	0.00721569	0.00284552	0.0855961
FGL1	19.4598	3.71092	2.40913e-84	7.61135e-83	0.0166028	ARPs	0.240879	0.020279	0.237646	0.0133917	0.0275411	0.0748653
RERG	27.494	3.67769	2.07221e-166	1.4976e-163	0.0721649	WMAs	0.606992	0.0715563	0.797368	0.0811374	0.0910406	0.528704
TMEM100	8.34221	3.65937	7.29131e-17	6.23301e-16	0.00669643	SVZCs	0.182345	0.00402199	0.0742827	0.00608438	0.0786398	0.0173617
CPED1	32.3102	3.65841	5.02741e-229	3.1825e-227	0.0300325	SVZCs	0.691496	0.04854	0.399396	0.0381428	0.209122	0.136772
EPHA4	32.098	3.65502	4.70298e-226	5.43822e-223	0.0848533	WMAs	0.773505	0.138411	0.862971	0.170073	0.103252	0.507195
PTN	71.783	3.61172	0	0	0.150162	SVZCs	1.24548	0.308238	1.2818	0.193049	0.540914	1.16389
NRXN1	92.6312	3.60487	0	0	0.660308	SVZCs	4.13812	2.37303	4.26992	1.9163	3.57449	3.65921
AL136962.1	13.076	3.6013	4.51372e-39	6.97776e-38	0.0131899	SVZCs	0.145392	0.0224211	0.21298	0.0193684	0.0734652	0.138414
NRP1	25.0588	3.57568	1.40052e-138	6.30963e-136	0.0602696	WMAs	0.317863	0.16881	0.680737	0.020935	0.0786286	1.30623
AC068308.1	32.549	3.56766	2.16253e-232	2.77845e-229	0.113402	WMAs	1.24841	0.0625002	1.12481	0.0823496	0.161604	0.630698
AL121956.4	9.72697	3.56546	2.31389e-22	2.40831e-21	0.00811688	SVZCs	0.0516283	0.0155558	0.0914376	0.00805511	0.0271261	0.0366653
AC078842.2	6.82402	3.56502	8.85295e-12	5.22383e-11	0.00689655	ARPs	0.0576932	0.00649693	0.0743124	0.00464577	0.012736	0.114773
PRSS35	18.9138	3.56151	8.77636e-80	2.29775e-78	0.0168425	SVZCs	0.121354	0.0245213	0.178503	0.0164169	0.0231669	0.0840855
RNF43	14.5982	3.55341	2.88534e-48	3.12789e-46	0.0293418	WMAs	0.164664	0.031463	0.292617	0.040664	0.0285426	0.187635
TMPRSS3	11.194	3.50863	4.36103e-29	4.62784e-28	0.0091954	ARPs	0.12778	0.00997254	0.108021	0.00503855	0.0564837	0.208995
GNA14	82.6146	3.47206	0	0	0.284091	SVZCs	1.7949	0.85679	2.01806	0.462409	1.05661	2.85282
SPRY4	8.81812	3.46812	1.16393e-18	1.06226e-17	0.00811688	SVZCs	0.124914	0.0306271	0.0760223	0.00711212	0.0399977	0.144613
RANBP17	15.7845	3.4348	3.97473e-56	7.93345e-55	0.0199234	ARPs	0.1685	0.0235174	0.228987	0.0155281	0.0780137	0.286102
ADRA1B	14.3117	3.41558	1.85054e-46	3.28701e-45	0.0107549	SVZCs	0.1491	0.0245742	0.138423	0.0138171	0.0190891	0.243183
RNF43	24.4662	3.41075	3.38114e-132	1.75062e-130	0.0275862	ARPs	0.164664	0.031463	0.292617	0.040664	0.0285426	0.187635
GRID2	65.1777	3.40803	0	0	0.342529	ARPs	2.25906	0.682851	2.43339	0.28772	2.25762	1.90409
AL136962.1	11.6861	3.38795	1.50096e-31	1.70771e-30	0.0150702	ARPs	0.145392	0.0224211	0.21298	0.0193684	0.0734652	0.138414
SNCG	13.5609	3.37975	6.82783e-42	1.11515e-40	0.0119724	SVZCs	0.279746	0.0358252	0.128664	0.0131051	0.036059	0.172714
SLC1A2	100.356	3.3772	0	0	0.878653	SVZCs	3.93361	2.58779	4.36221	2.1344	3.13006	3.86696
RUBCNL	24.4675	3.37091	3.27868e-132	1.27939e-130	0.0239448	SVZCs	0.291896	0.0730275	0.246612	0.0266757	0.193382	0.254496
ARHGAP24	62.9553	3.35801	0	0	0.202299	ARPs	1.43493	0.34167	1.64406	0.109308	0.883161	1.56733
LINC01727	8.95835	3.35175	3.29572e-19	2.58838e-18	0.0122605	ARPs	0.0795913	0.0141685	0.135993	0.00660499	0.246466	0.0643033
ZNF728	11.3899	3.32778	4.69476e-30	6.01852e-29	0.0113636	SVZCs	0.122252	0.017119	0.103692	0.0108229	0.0585323	0.117006
HGD	7.87517	3.32431	3.40289e-15	2.70686e-14	0.00730519	SVZCs	0.226203	0.0108185	0.0733045	0.00756456	0.0143625	0.0617062
CHI3L1	36.8117	3.31712	1.20006e-296	1.00313e-294	0.0691964	SVZCs	0.686185	0.913106	0.68118	0.093442	0.440589	2.43744
TMEM241	59.88	3.31142	0	0	0.1553	ARPs	1.39093	0.202638	1.17248	0.153337	0.778983	1.22707
CPED1	28.627	3.3031	3.10234e-180	2.34979e-178	0.0360153	ARPs	0.691496	0.04854	0.399396	0.0381428	0.209122	0.136772
LINC02231	8.90891	3.29973	5.15356e-19	4.02198e-18	0.00817369	ARPs	0.0655411	0.0103907	0.0979016	0.0249412	0.021216	0.0445549
GABRA4	24.2763	3.29579	3.48752e-130	1.3906e-127	0.0674068	WMAs	0.64525	0.0565746	0.605828	0.0551546	0.0813952	0.847045
UNC5C	58.7672	3.27786	0	0	0.134537	SVZCs	1.08268	0.225527	1.05817	0.177263	0.452321	1.36481
ARHGAP29	26.4129	3.26893	9.74707e-154	4.37987e-152	0.0316558	SVZCs	0.31597	0.0891611	0.301969	0.0359181	0.108553	0.385887
FGL1	11.0981	3.26406	1.282e-28	8.5689e-27	0.0261697	WMAs	0.240879	0.020279	0.237646	0.0133917	0.0275411	0.0748653
ZNF676	10.0532	3.25905	8.89392e-24	8.08729e-23	0.0130268	ARPs	0.174671	0.0134271	0.121697	0.00507906	0.028121	0.138024
LINC00645	18.3949	3.25664	1.44416e-75	3.64084e-74	0.0239448	SVZCs	0.378589	0.0197264	0.252754	0.0296441	0.279348	0.0892893
AL356737.2	46.0417	3.25413	0	0	0.091954	ARPs	0.754955	0.11265	0.759712	0.14212	0.359974	1.02343
AC090993.1	16.1151	3.24765	1.99929e-58	4.2187e-57	0.0194805	SVZCs	0.138387	0.0401731	0.220613	0.0256563	0.141655	0.161719
LRRC3B	70.5881	3.20783	0	0	0.211851	SVZCs	1.08066	0.533013	1.51868	0.3264	0.399838	1.692
EPHA4	51.4684	3.20635	0	0	0.0960409	ARPs	0.773505	0.138411	0.862971	0.170073	0.103252	0.507195
LINC00499	58.0418	3.1927	0	0	0.260281	ARPs	2.10579	0.631415	2.20259	0.452389	1.10097	1.21809
AC007402.1	24.6597	3.19159	2.89484e-134	1.55693e-132	0.0480204	ARPs	0.210015	0.0689112	0.501857	0.0417998	0.204287	0.294032
OXTR	13.0925	3.18273	3.63517e-39	5.64729e-38	0.0144075	SVZCs	0.161713	0.0257356	0.127834	0.0149061	0.254278	0.272758
GNA14-AS1	49.7125	3.1812	0	0	0.101055	SVZCs	0.800536	0.178842	0.801028	0.126953	0.282047	1.8371
SLC8A1	37.9873	3.17113	0	0	0.260904	WMAs	1.42883	0.659566	1.78509	0.460923	0.438685	1.56527
ADPGK-AS1	13.693	3.16898	1.1174e-42	1.85113e-41	0.0158279	SVZCs	0.0958552	0.034511	0.134428	0.0158707	0.0534134	0.281399
AL590867.1	13.8962	3.16735	6.68052e-44	1.51271e-42	0.0264766	AR1	0.0270674	0.0651868	0.220334	0.0534967	0.117396	0.156209
FAT3	81.0096	3.16711	0	0	0.372159	SVZCs	2.20326	1.19645	2.24137	0.660546	2.32861	2.28709
KCNQ3	41.5116	3.15757	0	0	0.0853129	ARPs	0.652405	0.131043	0.810665	0.0770479	0.372132	1.26274
GPC5-AS1	15.5919	3.15473	8.2611e-55	1.61543e-53	0.0209451	ARPs	0.15939	0.0218934	0.179924	0.0265206	0.0682123	0.286528
IGFN1	7.20288	3.14746	5.89554e-13	4.22467e-12	0.00771104	SVZCs	0.0137615	0.0236912	0.0676303	0.00786542	0.0282852	0.0694457
AC068725.1	10.3538	3.12407	4.02095e-25	3.81111e-24	0.0127714	ARPs	0.101157	0.0132093	0.109687	0.0235166	0.0364101	0.123031
ETV1	46.2486	3.11206	0	0	0.080763	SVZCs	0.819894	0.165658	0.631543	0.0969797	0.396592	0.587
AL359317.1	9.305	3.10948	1.33987e-20	1.31411e-19	0.0119724	SVZCs	0.0496796	0.0449775	0.0993253	0.0120267	0.0260853	0.251532
NLGN4X	63.0336	3.10188	0	0	0.145495	SVZCs	1.19958	0.42363	1.10903	0.212377	0.593615	1.25547
POU3F1	10.1629	3.10108	2.90195e-24	2.6795e-23	0.00970626	ARPs	0.126736	0.0127813	0.104698	0.00397485	0.0475902	0.0835608
DACH1	21.065	3.0995	1.66725e-98	4.07302e-96	0.0959556	WMAs	0.812278	0.174157	0.681224	0.206637	0.107871	0.491671
SLC8A1	68.9562	3.08255	0	0	0.268263	SVZCs	1.42883	0.659566	1.78509	0.460923	0.438685	1.56527
AC091885.2	15.9463	3.066	3.02268e-57	6.16804e-56	0.0232439	ARPs	0.336432	0.0255078	0.195866	0.0896933	0.100077	0.146224
APOC1	37.8885	3.06417	0	0	0.065138	SVZCs	1.11967	0.137762	0.536763	0.0815286	0.232715	0.788384
PRSS35	9.66207	3.05974	4.36964e-22	2.24235e-20	0.0277557	WMAs	0.121354	0.0245213	0.178503	0.0164169	0.0231669	0.0840855
TRIB1	13.66	3.05272	1.75911e-42	2.61119e-41	0.0153257	ARPs	0.12502	0.0174577	0.136393	0.00990005	0.0329131	0.0861457
MOXD1	16.8677	3.05248	7.77476e-64	1.14769e-61	0.0634417	WMAs	0.658211	0.433235	0.529894	0.49814	0.0808643	0.410397
THSD4	16.6178	3.0509	5.18412e-62	1.13534e-60	0.023539	SVZCs	0.136999	0.0326749	0.207495	0.0274447	0.0422594	0.248229
GPC5-AS2	42.0974	3.04054	0	0	0.0891443	ARPs	0.587524	0.104722	0.646258	0.11801	0.299758	0.867188
CRYM	7.48181	3.03568	7.33043e-14	2.44277e-12	0.0198255	WMAs	0.364394	0.0320794	0.151983	0.0363133	0.0198187	0.124941
RNF43	26.0901	3.03398	4.71813e-150	2.06396e-148	0.0349026	SVZCs	0.164664	0.031463	0.292617	0.040664	0.0285426	0.187635
FSTL5	63.2472	3.03367	0	0	0.247765	ARPs	1.99019	0.427989	1.68162	1.22388	1.25772	1.23046
ENTPD1	49.2844	3.0266	0	0	0.100852	SVZCs	0.495769	0.130721	0.700571	0.117379	0.416867	0.793106
ADAMTS17	60.7268	3.02279	0	0	0.201022	ARPs	1.46389	0.298114	1.34097	0.356734	0.473552	1.13102
GRIA2	76.1344	3.00617	0	0	0.296672	SVZCs	1.57343	0.56401	1.65493	0.423195	1.07276	1.2939
CACNA1A	36.2425	3.00321	1.30385e-287	1.75994e-285	0.0957854	ARPs	0.393983	0.120933	0.708372	0.131523	0.124861	0.515055
AL121894.3	8.6779	2.99884	4.03155e-18	3.0423e-17	0.00842912	ARPs	0.0835208	0.00993702	0.0768022	0.00504628	0.0280607	0.0311283
THSD1	29.4646	2.99209	8.18718e-191	4.43771e-189	0.0434253	SVZCs	0.218409	0.0545112	0.314741	0.045444	0.0521011	0.193448
GPC5	99.2351	2.98814	0	0	0.851055	SVZCs	4.20267	2.7928	4.36219	2.3757	3.94296	4.3087
CXCL14	29.6939	2.98692	9.19655e-194	7.72466e-192	0.0416347	ARPs	0.319721	0.0568206	0.380834	0.0143749	0.0952953	0.439939
AC009899.1	12.2697	2.98435	1.31739e-34	1.62924e-33	0.0135377	ARPs	0.0677882	0.0180867	0.134911	0.0184083	0.0597816	0.158676
CADM2-AS2	7.36956	2.97944	1.71198e-13	1.08393e-12	0.0104725	ARPs	0.0890076	0.010762	0.0818899	0.0299899	0.0437676	0.0860169
PRSS35	16.4909	2.97679	4.26628e-61	9.38474e-60	0.0229885	ARPs	0.121354	0.0245213	0.178503	0.0164169	0.0231669	0.0840855
RLBP1	19.7938	2.96003	3.36451e-87	9.35966e-86	0.0243506	SVZCs	0.235086	0.0291759	0.199058	0.0279119	0.0480061	0.211054
AC009899.1	13.3196	2.9587	1.78125e-40	2.84361e-39	0.0154221	SVZCs	0.0677882	0.0180867	0.134911	0.0184083	0.0597816	0.158676
CACNA1A	21.3189	2.9542	7.58687e-101	1.94954e-98	0.105472	WMAs	0.393983	0.120933	0.708372	0.131523	0.124861	0.515055
LINC01414	19.9295	2.95411	2.25779e-88	7.51656e-87	0.0375479	ARPs	0.184414	0.0494308	0.331238	0.0668994	0.139512	0.167859
SLC35F1	73.2702	2.95282	0	0	0.310674	SVZCs	1.84573	0.97421	1.80948	0.506596	1.05135	1.85328
GPAM	61.7296	2.94879	0	0	0.176339	SVZCs	0.833846	0.278555	0.987407	0.197325	0.886381	0.632866
ADRA1B	7.42887	2.94547	1.09532e-13	3.59817e-12	0.0166534	WMAs	0.1491	0.0245742	0.138423	0.0138171	0.0190891	0.243183
HSD17B6	21.1283	2.94539	4.36719e-99	1.67586e-97	0.0306513	ARPs	0.197098	0.0343343	0.23828	0.060854	0.0724964	0.124666
DIO3OS	14.0451	2.94274	8.26e-45	1.29891e-43	0.0217114	ARPs	0.157901	0.0233482	0.166894	0.00774781	0.0484244	0.37005
AL354863.1	13.3529	2.94264	1.13997e-40	1.82574e-39	0.0158279	SVZCs	0.175494	0.0236569	0.126618	0.017405	0.0258301	0.0491025
FRMD4A	71.8134	2.92814	0	0	0.325081	SVZCs	1.5151	0.508678	1.62386	0.42858	1.2049	1.68991
OAF	30.1509	2.92544	1.04265e-199	9.04237e-197	0.138779	WMAs	0.744673	0.148589	0.788908	0.0836946	0.146769	0.760776
ADRB1	19.8183	2.91882	2.06986e-87	5.7906e-86	0.025974	SVZCs	0.187467	0.058262	0.183952	0.0263555	0.136381	0.149443
BMPER	22.0159	2.91551	2.02941e-107	5.86669e-105	0.0896114	WMAs	0.465776	0.181322	0.607038	0.140415	0.104962	0.522294
OAF	50.5912	2.90632	0	0	0.11954	ARPs	0.744673	0.148589	0.788908	0.0836946	0.146769	0.760776
AL356737.2	48.0927	2.89715	0	0	0.12155	SVZCs	0.754955	0.11265	0.759712	0.14212	0.359974	1.02343
RLBP1	17.71	2.89522	3.50853e-70	8.95591e-69	0.0273308	ARPs	0.235086	0.0291759	0.199058	0.0279119	0.0480061	0.211054
UNC5C	50.4708	2.89447	0	0	0.156577	ARPs	1.08268	0.225527	1.05817	0.177263	0.452321	1.36481
EPHA4	54.117	2.88574	0	0	0.125	SVZCs	0.773505	0.138411	0.862971	0.170073	0.103252	0.507195
GPC5-AS1	16.6303	2.87476	4.2064e-62	9.21794e-61	0.025974	SVZCs	0.15939	0.0218934	0.179924	0.0265206	0.0682123	0.286528
CACNA1A	38.8599	2.8743	0	0	0.109984	SVZCs	0.393983	0.120933	0.708372	0.131523	0.124861	0.515055
LINC00498	11.6727	2.87167	1.75841e-31	1.99671e-30	0.0181354	ARPs	0.180978	0.019911	0.137317	0.0275134	0.0431126	0.0884225
CADM2-AS1	8.01297	2.86747	1.11969e-15	7.74052e-15	0.0130268	ARPs	0.0987272	0.0130982	0.0918653	0.0340988	0.0599096	0.141623
ENTPD1	43.8052	2.86145	0	0	0.104981	ARPs	0.495769	0.130721	0.700571	0.117379	0.416867	0.793106
LRRC3B	36.1897	2.85888	8.83818e-287	1.70331e-283	0.274385	WMAs	1.08066	0.533013	1.51868	0.3264	0.399838	1.692
GPC5-AS2	44.8628	2.85843	0	0	0.109172	SVZCs	0.587524	0.104722	0.646258	0.11801	0.299758	0.867188
NRXN1	83.5436	2.85746	0	0	0.812771	ARPs	4.13812	2.37303	4.26992	1.9163	3.57449	3.65921
PTN	58.3665	2.85008	0	0	0.209451	ARPs	1.24548	0.308238	1.2818	0.193049	0.540914	1.16389
ADORA2B	28.1998	2.84151	5.874e-175	2.92352e-173	0.0375406	SVZCs	0.304428	0.124611	0.297862	0.0472731	0.108492	0.374942
PDE4D	68.993	2.83126	0	0	0.469221	ARPs	2.64621	0.885971	2.41091	1.23638	2.17051	2.03512
AP000462.1	39.5398	2.82504	0	0	0.105236	ARPs	0.960824	0.12736	0.674225	0.236672	0.256144	1.01834
PAPSS2	7.95582	2.81057	1.77945e-15	1.4309e-14	0.0111607	SVZCs	0.0402172	0.0210822	0.0822213	0.012141	0.0882618	0.145513
HGD	6.94864	2.80579	3.68818e-12	2.21585e-11	0.0091954	ARPs	0.226203	0.0108185	0.0733045	0.00756456	0.0143625	0.0617062
THSD4	14.6936	2.79545	7.08093e-49	1.21965e-47	0.0275862	ARPs	0.136999	0.0326749	0.207495	0.0274447	0.0422594	0.248229
THSD1	15.4278	2.79002	1.06432e-53	1.28198e-51	0.0539255	WMAs	0.218409	0.0545112	0.314741	0.045444	0.0521011	0.193448
CCBE1	15.4724	2.78439	5.3295e-54	1.06131e-52	0.0298295	SVZCs	0.453149	0.041929	0.247892	0.0400219	0.0536538	0.279974
AC007682.1	7.09268	2.78208	1.31536e-12	8.03627e-12	0.0109834	ARPs	0.0595529	0.0114132	0.0759929	0.0134285	0.0283283	0.0764331
CASTOR1	13.844	2.76899	1.38218e-43	2.33437e-42	0.0204951	SVZCs	0.121216	0.0514207	0.129032	0.0200041	0.0789178	0.121219
AC087855.2	7.89227	2.76651	2.96735e-15	2.36801e-14	0.0111607	SVZCs	0.0561656	0.0184044	0.0822616	0.0125216	0.0589426	0.0724271
AC018541.1	6.82822	2.76093	8.5972e-12	5.07637e-11	0.00970626	ARPs	0.035652	0.0109917	0.0722425	0.00560439	0.0324669	0.0153801
SLC2A12	29.0863	2.7555	5.35362e-186	4.23046e-184	0.0487867	ARPs	0.344541	0.0596512	0.347182	0.0873402	0.234958	0.185714
SH3RF1	62.1804	2.74441	0	0	0.20556	SVZCs	1.38157	0.338257	1.12898	0.27175	0.729764	0.837946
SLC7A10	25.0258	2.74093	3.20221e-138	1.77736e-136	0.0355045	ARPs	0.256129	0.0469876	0.278849	0.0233794	0.182818	0.197936
NRSN1	20.3574	2.73751	3.99311e-92	1.38938e-90	0.0367816	ARPs	0.130306	0.0475907	0.281461	0.0590002	0.282534	0.0729802
AC104072.1	15.0553	2.7347	3.18479e-51	6.08038e-50	0.0229302	SVZCs	0.0969964	0.0241861	0.147091	0.0235272	0.030547	0.0802586
EPAS1	30.8998	2.72796	1.20062e-209	7.02354e-208	0.057224	SVZCs	0.312069	0.239631	0.358656	0.0630835	0.179451	0.657637
AL445259.1	42.7136	2.7258	0	0	0.120051	ARPs	1.11848	0.149531	0.726084	0.244711	0.455353	0.375035
ABCD2	45.3233	2.72452	0	0	0.119285	ARPs	0.719497	0.145931	0.712188	0.158573	0.516106	0.302992
THSD1	26.1006	2.72303	3.59145e-150	2.20119e-148	0.0475096	ARPs	0.218409	0.0545112	0.314741	0.045444	0.0521011	0.193448
F11-AS1	51.8008	2.72136	0	0	0.156453	SVZCs	0.702264	0.339682	0.961186	0.219017	0.556843	0.525504
ADAMTS17	63.4733	2.71921	0	0	0.253247	SVZCs	1.46389	0.298114	1.34097	0.356734	0.473552	1.13102
CHRDL1	37.0402	2.71774	2.58356e-300	3.68822e-298	0.0842912	ARPs	0.485961	0.0990759	0.521851	0.113095	0.107748	0.364902
CCBE1	14.1087	2.71585	3.35866e-45	5.33235e-44	0.0286079	ARPs	0.453149	0.041929	0.247892	0.0400219	0.0536538	0.279974
LHX2	24.6573	2.70714	3.07618e-134	1.2857e-131	0.104679	WMAs	0.89128	0.274934	0.593875	0.275323	0.117063	0.380651
AC097518.2	58.8766	2.70379	0	0	0.206778	SVZCs	1.18161	0.170597	1.53105	0.442181	0.910018	0.754396
TAFA1	27.6612	2.70267	2.04671e-168	9.9301e-167	0.0596591	SVZCs	0.332488	0.171048	0.477472	0.0898477	0.197831	0.304814
AC104072.1	13.4148	2.69437	4.95182e-41	7.14553e-40	0.0257982	ARPs	0.0969964	0.0241861	0.147091	0.0235272	0.030547	0.0802586
HTRA1	63.2925	2.68915	0	0	0.224026	SVZCs	1.31047	0.468245	1.1047	0.272277	0.727667	0.777692
LHFPL1	13.939	2.6863	3.66833e-44	5.69371e-43	0.0245211	ARPs	0.11946	0.0264627	0.159227	0.031182	0.0820281	0.0906342
AC245187.2	10.0268	2.68207	1.16257e-23	1.05327e-22	0.0189017	ARPs	0.046829	0.0209011	0.127117	0.0222264	0.0430217	0.0725369
ME1	57.2152	2.66694	0	0	0.230651	ARPs	1.57588	0.345305	1.28626	0.439077	0.992666	1.19098
ZNF728	9.78339	2.66172	1.32694e-22	1.16271e-21	0.0166028	ARPs	0.122252	0.017119	0.103692	0.0108229	0.0585323	0.117006
SLC1A2	82.682	2.6542	0	0	0.908301	ARPs	3.93361	2.58779	4.36221	2.1344	3.13006	3.86696
AKAP12	50.6972	2.6508	0	0	0.120942	SVZCs	0.7837	0.231428	0.746118	0.162592	0.164128	1.09622
GNA14-AS1	42.1074	2.64842	0	0	0.126437	ARPs	0.800536	0.178842	0.801028	0.126953	0.282047	1.8371
NT5E	36.0788	2.64839	4.871e-285	3.89343e-283	0.0726461	SVZCs	0.484076	0.130135	0.421603	0.0803269	0.237957	0.198936
AL354771.1	14.0678	2.64573	5.98819e-45	9.438e-44	0.0280971	ARPs	0.247517	0.0323654	0.187193	0.0756641	0.0877779	0.17151
LRP4-AS1	28.045	2.64152	4.60161e-173	3.31871e-171	0.0710089	ARPs	0.479534	0.0750128	0.396139	0.127708	0.12629	0.302122
AC103874.1	9.22592	2.64072	2.81143e-20	2.72198e-19	0.0164367	SVZCs	0.0288188	0.0201151	0.0970065	0.0162023	0.0568912	0.169619
AKAP12	27.2757	2.63609	8.2347e-164	5.71324e-161	0.137986	WMAs	0.7837	0.231428	0.746118	0.162592	0.164128	1.09622
SLC1A4	58.8126	2.63049	0	0	0.192573	SVZCs	0.982695	0.358726	0.945135	0.226377	0.686598	0.580754
SLC8A1-AS1	12.6733	2.63023	8.31628e-37	6.95161e-35	0.0483743	WMAs	0.243424	0.0667162	0.308178	0.0586959	0.0566627	0.371005
GLUL	70.4534	2.6265	0	0	0.424107	SVZCs	1.94619	1.02026	1.86314	0.632107	1.43978	2.10922
SEMA4A	26.8367	2.62366	1.20557e-158	5.59855e-157	0.0440341	SVZCs	0.220096	0.0788333	0.277134	0.0505174	0.136746	0.142152
FRMD4A	60.029	2.61868	0	0	0.32848	ARPs	1.5151	0.508678	1.62386	0.42858	1.2049	1.68991
CYP2J2	42.6596	2.61472	0	0	0.109834	ARPs	0.614857	0.141231	0.65706	0.221295	0.669916	0.4601
AL121956.4	8.35414	2.61056	6.59115e-17	4.76646e-16	0.012516	ARPs	0.0516283	0.0155558	0.0914376	0.00805511	0.0271261	0.0366653
AC245123.1	7.52906	2.60163	5.11062e-14	3.3039e-13	0.0145594	ARPs	0.0280106	0.0158047	0.0922986	0.0202136	0.0300338	0.0531266
ZSCAN31	8.89541	2.60162	5.82023e-19	4.53207e-18	0.0206897	ARPs	0.304674	0.0242317	0.138784	0.0353257	0.0390965	0.0652865
AC005009.2	11.8533	2.5989	2.06809e-32	1.51036e-30	0.0436162	WMAs	0.376669	0.018616	0.259939	0.014796	0.0478368	0.224867
DLC1	61.1915	2.59592	0	0	0.394891	ARPs	2.18256	0.612776	1.81025	0.758702	1.20254	1.79039
ETV5	14.3149	2.59583	1.76707e-46	3.14196e-45	0.025974	SVZCs	0.175309	0.0543626	0.1626	0.0287885	0.075803	0.157412
ABCD2	48.5737	2.59531	0	0	0.14164	SVZCs	0.719497	0.145931	0.712188	0.158573	0.516106	0.302992
ACSBG1	70.7912	2.5945	0	0	0.336039	SVZCs	1.75564	1.32959	1.66763	0.53759	1.80478	1.47952
PRR5	40.4329	2.59245	0	0	0.0886769	SVZCs	0.5063	0.213321	0.49303	0.100444	0.203647	0.455589
AC245187.2	10.9476	2.59241	6.82351e-28	8.28227e-27	0.0196834	SVZCs	0.046829	0.0209011	0.127117	0.0222264	0.0430217	0.0725369
LINC02698	34.7411	2.59049	1.89125e-264	2.30202e-262	0.0863346	ARPs	0.572581	0.120987	0.573587	0.185296	0.486664	0.435053
CHRDL1	21.2948	2.59033	1.26907e-100	3.23706e-98	0.107851	WMAs	0.485961	0.0990759	0.521851	0.113095	0.107748	0.364902
AC090993.1	13.7182	2.59021	7.89662e-43	1.18586e-41	0.0280971	ARPs	0.138387	0.0401731	0.220613	0.0256563	0.141655	0.161719
EDNRB	64.7291	2.58258	0	0	0.305804	SVZCs	1.47992	0.442056	1.31095	0.373191	0.999618	0.803527
AC087482.1	26.5965	2.58099	7.45009e-156	3.40058e-154	0.0499188	SVZCs	0.17422	0.198001	0.31095	0.0591687	0.216597	0.609827
SLC8A1-AS1	23.2917	2.57789	5.37928e-120	1.92379e-118	0.0480925	SVZCs	0.243424	0.0667162	0.308178	0.0586959	0.0566627	0.371005
ADRA1B	12.1627	2.5771	4.90852e-34	5.99143e-33	0.0186462	ARPs	0.1491	0.0245742	0.138423	0.0138171	0.0190891	0.243183
AC073050.1	38.1991	2.56589	0	0	0.435369	WMAs	2.02267	1.24544	2.00925	0.961199	0.737455	1.68644
OBI1-AS1	84.4122	2.55997	0	0	0.760552	SVZCs	3.25352	2.02225	3.4995	1.86304	3.05007	2.92285
CSPG5	29.4235	2.55525	2.74885e-190	1.48071e-188	0.0655438	SVZCs	0.26965	0.097957	0.352642	0.0694672	0.119863	0.20217
SLC4A4	77.8185	2.55311	0	0	0.63961	SVZCs	2.48057	1.57416	2.70199	1.21491	2.51387	2.66586
AC007682.1	7.53958	2.54604	4.71497e-14	3.55879e-13	0.0133929	SVZCs	0.0595529	0.0114132	0.0759929	0.0134285	0.0283283	0.0764331
AF279873.3	37.8697	2.5354	0	0	0.136161	SVZCs	0.715973	0.259946	0.905112	0.226294	0.681673	0.876284
AL137017.1	11.4571	2.53093	2.16581e-30	2.79405e-29	0.0204951	SVZCs	0.0534842	0.0325095	0.13052	0.0238371	0.0569258	0.0514812
CA12	17.8124	2.52794	5.66181e-71	1.36395e-69	0.0334821	SVZCs	0.188617	0.133061	0.214421	0.0406277	0.367801	0.230885
ZFHX4-AS1	20.1412	2.52446	3.21467e-90	9.23152e-89	0.0401786	SVZCs	0.250059	0.0801945	0.248166	0.0477953	0.119461	0.177212
AL158840.1	29.4372	2.52398	1.83362e-190	9.89242e-189	0.0681818	SVZCs	0.246031	0.0952796	0.362792	0.0732845	0.391215	0.172539
EPHB1	34.8433	2.52298	5.36889e-266	9.31233e-263	0.359239	WMAs	1.49022	0.693041	1.5514	0.571719	0.498885	1.17329
KCNIP1	37.7387	2.52239	0	0	0.101867	SVZCs	0.362025	0.190343	0.611653	0.136985	0.421423	0.732548
MFGE8	33.4948	2.51727	5.74428e-246	3.96161e-244	0.0809659	SVZCs	0.418552	0.0918801	0.414018	0.085799	0.218383	0.267872
CHRDL1	39.4994	2.51652	0	0	0.0957792	SVZCs	0.485961	0.0990759	0.521851	0.113095	0.107748	0.364902
HS3ST5	32.7839	2.50648	9.99112e-236	6.50266e-234	0.0903003	SVZCs	0.610928	0.193805	0.522267	0.113952	0.192477	0.325529
LINC01414	19.9056	2.5048	3.63653e-88	1.0223e-86	0.0586445	SVZCs	0.184414	0.0494308	0.331238	0.0668994	0.139512	0.167859
AL590617.2	32.9659	2.50076	2.50362e-238	1.66063e-236	0.0722403	SVZCs	0.357024	0.0983965	0.38341	0.079329	0.208697	0.229372
AL354863.1	11.5338	2.49535	8.91379e-31	9.91088e-30	0.0214559	ARPs	0.175494	0.0236569	0.126618	0.017405	0.0258301	0.0491025
AL450345.2	9.39843	2.48896	5.53852e-21	5.49574e-20	0.0162338	SVZCs	0.0833164	0.017517	0.093103	0.0172321	0.0586049	0.0525889
GRIA2	62.0051	2.48188	0	0	0.374202	ARPs	1.57343	0.56401	1.65493	0.423195	1.07276	1.2939
CALN1	47.6778	2.47641	0	0	0.185268	SVZCs	0.642036	0.7906	1.08741	0.302605	0.41831	1.64134
BMPER	38.1602	2.46958	0	0	0.104099	SVZCs	0.465776	0.181322	0.607038	0.140415	0.104962	0.522294
TSPAN7	62.7913	2.46917	0	0	0.303571	SVZCs	1.20535	0.468368	1.34297	0.412873	0.661185	1.16106
XKR6	47.0393	2.46547	0	0	0.174968	ARPs	1.07786	0.261981	0.976132	0.398137	0.52673	1.00057
AL450345.2	8.68066	2.4651	3.93495e-18	2.97004e-17	0.0145594	ARPs	0.0833164	0.017517	0.093103	0.0172321	0.0586049	0.0525889
COL23A1	23.2059	2.46179	3.9737e-119	1.40804e-117	0.0489042	SVZCs	0.251695	0.086603	0.29067	0.0594299	0.351531	0.26404
ZNF98	48.0841	2.4576	0	0	0.301149	ARPs	1.60289	0.565627	1.64436	0.20199	0.691382	1.43473
MERTK	59.4169	2.45728	0	0	0.323116	ARPs	1.79747	0.456371	1.42938	0.566173	1.0951	0.919286
PRDM16-DT	48.8361	2.45375	0	0	0.166396	SVZCs	0.69222	0.243439	0.773602	0.193196	0.234818	0.725694
ENOX1	60.329	2.45282	0	0	0.278206	SVZCs	1.04623	0.793817	1.34106	0.415841	1.29059	1.48695
LHFPL1	14.8489	2.44613	7.074e-50	1.32361e-48	0.0288149	SVZCs	0.11946	0.0264627	0.159227	0.031182	0.0820281	0.0906342
GALNT16	31.9464	2.43775	6.07124e-224	3.76764e-222	0.0813718	SVZCs	0.237858	0.406648	0.435661	0.0960124	0.172176	1.17722
PDE3B	17.5532	2.42762	5.62633e-69	1.33227e-67	0.0529627	SVZCs	0.296794	0.141052	0.320075	0.0677676	0.231027	0.182555
NRSN1	20.9692	2.41916	1.25316e-97	3.80667e-96	0.0515422	SVZCs	0.130306	0.0475907	0.281461	0.0590002	0.282534	0.0729802
ZNF727	12.7725	2.41849	2.33679e-37	3.50468e-36	0.0245536	SVZCs	0.174764	0.0504483	0.133155	0.0262925	0.104168	0.116469
THSD4	8.10252	2.41741	5.38316e-16	2.06802e-14	0.0396511	WMAs	0.136999	0.0326749	0.207495	0.0274447	0.0422594	0.248229
PIK3C2A	65.7942	2.4174	0	0	0.49834	ARPs	2.31048	0.753586	1.94701	0.935446	1.44903	1.59028
XAF1	28.7179	2.41656	2.2828e-181	1.17493e-179	0.0594562	SVZCs	0.305523	0.110155	0.330797	0.0708654	0.249371	0.410468
MFGE8	30.1557	2.41402	9.01817e-200	7.92001e-198	0.0804598	ARPs	0.418552	0.0918801	0.414018	0.085799	0.218383	0.267872
LINC02389	14.0069	2.41295	1.41488e-44	2.43829e-43	0.0278003	SVZCs	0.11122	0.0416487	0.166837	0.0335237	0.0716801	0.108511
SPRY1	8.8377	2.41078	9.77058e-19	8.95249e-18	0.0162338	SVZCs	0.12099	0.0190365	0.0886503	0.0172822	0.038822	0.0455794
SLC8A1	54.1742	2.40896	0	0	0.365006	ARPs	1.42883	0.659566	1.78509	0.460923	0.438685	1.56527
FREM2	29.9638	2.40797	2.90706e-197	1.61872e-195	0.0777192	SVZCs	0.370786	0.13852	0.435515	0.097882	0.0981285	0.253051
NRP1	36.2703	2.40702	4.75113e-288	6.48884e-286	0.10728	ARPs	0.317863	0.16881	0.680737	0.020935	0.0786286	1.30623
FREM2	16.357	2.40416	3.87532e-60	5.39898e-58	0.0761301	WMAs	0.370786	0.13852	0.435515	0.097882	0.0981285	0.253051
ESRRG	59.995	2.40136	0	0	0.419923	ARPs	2.183	0.759801	1.94752	0.768076	1.54008	1.17747
LINC00498	12.0105	2.39959	3.12961e-33	4.29966e-32	0.0257711	SVZCs	0.180978	0.019911	0.137317	0.0275134	0.0431126	0.0884225
AC019270.1	6.89115	2.39958	5.53446e-12	3.77562e-11	0.0133929	SVZCs	0.0589688	0.0158115	0.0613766	0.0119251	0.0411547	0.0339387
LYPD1	21.5049	2.39901	1.40108e-102	5.61891e-101	0.045977	ARPs	0.39017	0.0549031	0.260577	0.125772	0.140244	0.164883
AL390783.1	16.7857	2.39827	3.10628e-63	6.91193e-62	0.0377435	SVZCs	0.250666	0.0473578	0.208848	0.0431147	0.133001	0.353366
MAP2K6	14.9902	2.39738	8.5142e-51	2.68507e-49	0.0380024	AR2	0.160743	0.149095	0.190234	0.329633	0.312702	0.0390005
RORB	66.6763	2.39592	0	0	0.399554	SVZCs	1.66846	0.826932	1.682	0.605138	1.14942	1.18274
LRRC4C	59.5036	2.39243	0	0	0.481737	ARPs	1.90134	0.87281	2.11831	0.894976	1.81656	1.55279
GPAM	50.1566	2.39049	0	0	0.216603	ARPs	0.833846	0.278555	0.987407	0.197325	0.886381	0.632866
SLC8A1-AS1	20.4889	2.38727	2.70173e-93	9.57335e-92	0.054917	ARPs	0.243424	0.0667162	0.308178	0.0586959	0.0566627	0.371005
OXTR	11.0039	2.38703	3.65906e-28	3.77327e-27	0.0227331	ARPs	0.161713	0.0257356	0.127834	0.0149061	0.254278	0.272758
EPHA6	34.655	2.38287	3.76029e-263	6.21164e-260	0.479778	WMAs	2.28217	1.11088	2.28797	1.30888	0.992409	1.89469
PTCH1	43.7977	2.38177	0	0	0.151724	ARPs	0.783441	0.196036	0.75552	0.289659	0.745492	0.352317
ESRRG	66.1853	2.37901	0	0	0.437297	SVZCs	2.183	0.759801	1.94752	0.768076	1.54008	1.17747
SH3RF1	51.9322	2.37816	0	0	0.240868	ARPs	1.38157	0.338257	1.12898	0.27175	0.729764	0.837946
CHST1	33.4851	2.37392	7.93471e-246	5.46141e-244	0.0779221	SVZCs	0.268111	0.159239	0.390432	0.0881415	0.231541	0.379191
BST2	11.0433	2.37197	2.36321e-28	2.89989e-27	0.0213068	SVZCs	0.0970448	0.0586468	0.11708	0.0237115	0.0424253	0.189343
DNAH7	60.6738	2.36833	0	0	0.484291	ARPs	2.28003	0.798534	1.98941	1.58911	1.45074	1.39546
DACH1	31.7322	2.35948	5.58431e-221	5.29289e-219	0.119796	ARPs	0.812278	0.174157	0.681224	0.206637	0.107871	0.491671
AC104072.1	7.65307	2.35291	1.96245e-14	6.80773e-13	0.0317209	WMAs	0.0969964	0.0241861	0.147091	0.0235272	0.030547	0.0802586
DNM3	30.1624	2.35246	7.36797e-200	6.55372e-197	0.310864	WMAs	1.44891	0.499267	1.23455	0.528462	0.390121	1.30035
CCBE1	7.76699	2.35159	8.03714e-15	2.87431e-13	0.0404441	WMAs	0.453149	0.041929	0.247892	0.0400219	0.0536538	0.279974
SLITRK2	36.5448	2.34989	2.16057e-292	3.02218e-290	0.112133	ARPs	0.664923	0.124022	0.514693	0.18513	0.362453	0.37834
AC107223.1	26.1565	2.34525	8.31266e-151	3.65947e-149	0.0685877	SVZCs	0.230071	0.122216	0.390685	0.0899004	0.224684	0.326552
STK17B	30.8725	2.34489	2.79779e-209	2.54072e-207	0.0947637	ARPs	0.697412	0.109841	0.46362	0.161122	0.26987	0.279046
LRRC3B	53.2073	2.34062	0	0	0.323883	ARPs	1.08066	0.533013	1.51868	0.3264	0.399838	1.692
LRRC4C	65.8287	2.33793	0	0	0.528206	SVZCs	1.90134	0.87281	2.11831	0.894976	1.81656	1.55279
GPC5	81.388	2.33683	0	0	0.903959	ARPs	4.20267	2.7928	4.36219	2.3757	3.94296	4.3087
RHOJ	60.0291	2.33314	0	0	0.287541	SVZCs	1.30153	0.476756	1.22581	0.390457	0.564197	1.0074
CRYM	12.0226	2.33201	2.70202e-33	3.23776e-32	0.0234994	ARPs	0.364394	0.0320794	0.151983	0.0363133	0.0198187	0.124941
AC103874.1	8.22244	2.32581	1.99401e-16	1.42008e-15	0.0176245	ARPs	0.0288188	0.0201151	0.0970065	0.0162023	0.0568912	0.169619
CACNB2	61.0728	2.32057	0	0	0.466112	SVZCs	2.19639	1.02158	1.99096	0.817888	1.68961	1.95955
AC097537.1	17.5338	2.32003	7.90852e-69	1.97656e-67	0.0469987	ARPs	0.21741	0.0503117	0.229249	0.102525	0.0837532	0.299314
PCDH9-AS2	45.645	2.31458	0	0	0.258238	ARPs	1.38523	0.365281	1.16108	0.619404	0.707607	1.4091
ETNPPL	60.7341	2.31352	0	0	0.502682	ARPs	2.14628	0.925331	2.14818	1.03184	1.90503	1.30826
AL591686.2	20.7058	2.31215	3.06884e-95	1.11474e-93	0.0556833	ARPs	0.210106	0.0803288	0.347406	0.178585	0.324732	0.19462
RASL10A	20.7634	2.3107	9.28174e-96	2.78774e-94	0.0470779	SVZCs	0.281348	0.0586219	0.252098	0.0561841	0.134191	0.29805
AF279873.3	33.0344	2.31012	2.60745e-239	2.71629e-237	0.140485	ARPs	0.715973	0.259946	0.905112	0.226294	0.681673	0.876284
LINC02774	12.6042	2.30987	2.00163e-36	2.59285e-35	0.0286079	ARPs	0.0522798	0.0331643	0.154606	0.0383968	0.0840463	0.0800404
LUCAT1	24.7196	2.30642	6.58465e-135	2.82002e-132	0.190325	WMAs	1.03149	0.301163	0.855795	0.430968	0.241827	1.20623
AC009879.4	38.8334	2.30343	0	0	0.121144	SVZCs	0.415648	0.207685	0.593078	0.151862	0.310978	0.438682
HES5	10.0061	2.30282	1.43228e-23	1.95922e-22	0.0343323	AR1	0.0381997	0.0134897	0.175743	0.0121798	0.0528545	0.0444508
PLA2G5	18.434	2.3003	7.00431e-76	1.77487e-74	0.0357143	SVZCs	0.276498	0.07349	0.178703	0.0389554	0.195647	0.14372
AC079352.1	39.3533	2.30013	0	0	0.168072	ARPs	0.564919	0.286426	0.968286	0.330593	1.1444	0.623981
ALDOC	42.8686	2.29909	0	0	0.136364	SVZCs	0.881868	0.337758	0.617065	0.159922	0.371762	0.490183
LPAR1	11.6594	2.29446	2.05489e-31	2.70631e-30	0.0271916	SVZCs	0.16789	0.128873	0.149199	0.032273	0.0323744	0.282662
PCDH9-AS4	18.7807	2.2943	1.08659e-78	3.17822e-77	0.0551724	ARPs	0.280584	0.0600472	0.265102	0.108403	0.13648	0.38725
OBI1-AS1	69.8375	2.29179	0	0	0.776501	ARPs	3.25352	2.02225	3.4995	1.86304	3.05007	2.92285
ETV1	36.9326	2.28898	1.3875e-298	1.97264e-296	0.121839	ARPs	0.819894	0.165658	0.631543	0.0969797	0.396592	0.587
EDNRB	54.1186	2.28522	0	0	0.322861	ARPs	1.47992	0.442056	1.31095	0.373191	0.999618	0.803527
AL163541.1	18.9895	2.28467	2.084e-80	5.506e-79	0.046875	SVZCs	0.132908	0.119041	0.299841	0.0693004	0.107498	0.176412
AC068725.1	10.2892	2.28449	7.88253e-25	8.88385e-24	0.0227273	SVZCs	0.101157	0.0132093	0.109687	0.0235166	0.0364101	0.123031
AL713852.1	24.353	2.28264	5.38627e-131	2.08305e-129	0.0637175	SVZCs	0.287205	0.0796064	0.285129	0.0656085	0.137356	0.187701
SLIT1	21.0895	2.28263	9.93766e-99	2.46241e-96	0.140365	WMAs	0.822204	0.0574507	0.660194	0.053526	0.175799	0.799394
AC002429.2	54.7788	2.27828	0	0	0.533844	ARPs	2.17881	1.10855	2.38392	1.47299	1.3606	1.61603
AMPH	19.0647	2.27406	4.95989e-81	1.31745e-79	0.0460633	SVZCs	0.251523	0.0924816	0.227669	0.0515094	0.163764	0.157989
SPRY1	7.87873	2.27003	3.30714e-15	2.24554e-14	0.0176245	ARPs	0.12099	0.0190365	0.0886503	0.0172822	0.038822	0.0455794
EPHB1	59.7555	2.26918	0	0	0.391234	SVZCs	1.49022	0.693041	1.5514	0.571719	0.498885	1.17329
GNA14	57.2872	2.26678	0	0	0.454662	ARPs	1.7949	0.85679	2.01806	0.462409	1.05661	2.85282
APOC1	30.1506	2.26606	1.0528e-199	9.22261e-198	0.107024	ARPs	1.11967	0.137762	0.536763	0.0815286	0.232715	0.788384
AL390783.1	14.9945	2.25976	7.97535e-51	1.42979e-49	0.0398467	ARPs	0.250666	0.0473578	0.208848	0.0431147	0.133001	0.353366
LINC02406	31.3836	2.25823	3.38749e-216	3.13365e-214	0.0980843	ARPs	0.170382	0.123261	0.487085	0.186239	0.312823	0.348769
SAT1	56.4197	2.25798	0	0	0.280235	SVZCs	1.29284	0.433766	1.13784	0.366879	0.682077	1.36276
HOPX	30.9482	2.25669	2.68268e-210	1.57199e-208	0.0874594	SVZCs	0.667593	0.179677	0.426582	0.105552	0.404825	0.697423
DCHS1	9.64704	2.25498	5.05965e-22	5.21292e-21	0.0172484	SVZCs	0.0911157	0.0379174	0.0884258	0.0191838	0.0374282	0.0644064
AC016723.1	11.5992	2.25316	4.16183e-31	4.67684e-30	0.0306513	ARPs	0.148757	0.0316822	0.142763	0.0361581	0.0354594	0.204665
TBC1D10A	23.5561	2.25278	1.08637e-122	3.94205e-121	0.0556006	SVZCs	0.183643	0.130369	0.259045	0.0601933	0.187035	0.299902
ME1	56.9876	2.24829	0	0	0.297484	SVZCs	1.57588	0.345305	1.28626	0.439077	0.992666	1.19098
RASL10A	18.6855	2.24765	6.49763e-78	1.87523e-76	0.0487867	ARPs	0.281348	0.0586219	0.252098	0.0561841	0.134191	0.29805
TSPAN7	53.3466	2.24427	0	0	0.315453	ARPs	1.20535	0.468368	1.34297	0.412873	0.661185	1.16106
AC008957.2	39.704	2.24395	0	0	0.173436	ARPs	0.653588	0.236882	0.818078	0.271808	0.284001	1.77847
AC245123.1	7.9167	2.24347	2.43895e-15	1.95083e-14	0.0178571	SVZCs	0.0280106	0.0158047	0.0922986	0.0202136	0.0300338	0.0531266
NID1	33.5862	2.2426	2.67159e-247	1.85727e-245	0.102679	SVZCs	0.407904	0.19441	0.460201	0.116435	0.31412	0.345735
BRINP3	53.6737	2.24164	0	0	0.342273	ARPs	1.61327	0.561944	1.5187	0.699727	1.23365	0.888559
NRP2	28.5461	2.24126	3.14188e-179	1.60047e-177	0.0842127	SVZCs	0.41648	0.263289	0.461591	0.116953	0.510928	0.716898
AC092969.1	13.4621	2.24078	2.61266e-41	3.78742e-40	0.0372925	ARPs	0.190033	0.0423925	0.186212	0.0489408	0.0526515	0.172024
SHE	9.93378	2.23606	2.9678e-23	2.65822e-22	0.0189017	ARPs	0.112757	0.0225075	0.101868	0.043333	0.0466348	0.0861246
POLN	16.0545	2.22326	5.31851e-58	1.11547e-56	0.0401786	SVZCs	0.164742	0.0593535	0.186457	0.0429601	0.047279	0.118062
SLC14A1	50.6564	2.22325	0	0	0.430938	AR2	1.96223	1.5663	1.77509	1.66874	2.39889	0.717619
AL121827.2	13.118	2.22261	2.5987e-39	4.05528e-38	0.0284091	SVZCs	0.0323735	0.0613321	0.134174	0.0303013	0.0764604	0.136042
ADAMTS17	30.5856	2.22046	1.90158e-205	1.78286e-202	0.333862	WMAs	1.46389	0.298114	1.34097	0.356734	0.473552	1.13102
CXCL14	15.2533	2.21282	1.56621e-52	1.83553e-50	0.0872324	WMAs	0.319721	0.0568206	0.380834	0.0143749	0.0952953	0.439939
AL138828.1	31.1966	2.21053	1.18371e-213	1.08632e-211	0.117497	ARPs	0.636295	0.142775	0.536686	0.319501	0.384543	0.67454
OSTM1-AS1	8.24482	2.20534	1.65408e-16	1.18139e-15	0.0189017	ARPs	0.0884171	0.0218557	0.0970395	0.0326513	0.0214005	0.113682
SLC15A2	51.3272	2.2041	0	0	0.271009	ARPs	1.35835	0.364786	1.10804	0.654294	0.839919	0.551917
CC2D2B	33.4517	2.19932	2.43448e-245	2.62273e-243	0.129502	ARPs	0.255746	0.162633	0.593925	0.176827	0.379708	0.655981
AL807742.1	17.8017	2.19737	6.85549e-71	2.50598e-69	0.0858307	AR1	0.0926021	0.387681	0.368109	0.423012	0.475275	0.371053
AC074286.1	10.2079	2.19518	1.82707e-24	1.69786e-23	0.0275862	ARPs	0.0465658	0.0324105	0.140504	0.0442381	0.0817396	0.118693
SCML1	24.2226	2.19479	1.2861e-129	4.91894e-128	0.065138	SVZCs	0.250569	0.0920816	0.285637	0.0697252	0.086868	0.551922
AC106845.1	49.6144	2.18834	0	0	0.275862	ARPs	1.48135	0.422048	1.22178	0.441672	0.968162	0.784142
NTM-AS1	17.5125	2.18793	1.15081e-68	2.87206e-67	0.0521073	ARPs	0.258561	0.057534	0.238893	0.104072	0.107074	0.282742
SLC2A12	28.8023	2.18519	2.00651e-182	1.04045e-180	0.0789367	SVZCs	0.344541	0.0596512	0.347182	0.0873402	0.234958	0.185714
AL137139.2	25.7583	2.18261	2.60097e-146	1.36709e-143	0.272006	WMAs	1.49904	1.40066	1.45137	1.72434	0.542369	0.911665
TFCP2L1	14.2725	2.18209	3.24707e-46	5.7382e-45	0.0336851	SVZCs	0.170969	0.0541189	0.163246	0.0383307	0.245822	0.0966124
AC114316.1	8.76641	2.18168	1.84456e-18	1.41191e-17	0.0255428	ARPs	0.107215	0.0283178	0.122491	0.0461385	0.0933026	0.0923214
AL590617.2	28.3211	2.17605	1.90279e-176	1.40442e-174	0.0860792	ARPs	0.357024	0.0983965	0.38341	0.079329	0.208697	0.229372
DOCK5	48.6482	2.176	0	0	0.20901	SVZCs	0.98902	0.552946	0.921738	0.288898	0.973225	0.579664
DIO2	16.7482	2.17132	5.84064e-63	1.32599e-61	0.0462324	ARPs	0.114076	0.0604178	0.247276	0.0194986	0.145457	0.236259
DLC1	60.6382	2.17055	0	0	0.496753	SVZCs	2.18256	0.612776	1.81025	0.758702	1.20254	1.79039
PLD5	14.2335	2.16804	5.67995e-46	9.1688e-45	0.0426564	ARPs	0.136249	0.052193	0.21575	0.106237	0.128623	0.175621
AL590867.1	14.6745	2.16526	9.3904e-49	1.72997e-47	0.0379464	SVZCs	0.0270674	0.0651868	0.220334	0.0534967	0.117396	0.156209
FOXP2	16.5222	2.16495	2.53869e-61	5.60224e-60	0.0590038	ARPs	0.552044	0.0923483	0.360371	0.164887	0.232002	0.250578
RLBP1	9.13687	2.16311	6.42851e-20	3.05487e-18	0.0531324	WMAs	0.235086	0.0291759	0.199058	0.0279119	0.0480061	0.211054
RRS1-AS1	7.11222	2.15912	1.14193e-12	8.0778e-12	0.0152192	SVZCs	0.0420675	0.018172	0.0644635	0.0147982	0.0277488	0.0412262
AL360178.1	16.1498	2.15682	1.13847e-58	2.38632e-57	0.051341	ARPs	0.29967	0.057837	0.235481	0.143585	0.174436	0.296433
C1orf61	73.2804	2.15483	0	0	0.6528	SVZCs	2.17634	1.45821	2.21593	1.04192	1.98491	1.92233
AC012404.1	38.2248	2.15325	0	0	0.17931	ARPs	1.01287	0.22209	0.744892	0.499403	0.473888	0.766734
CRYM	12.6141	2.15009	1.76652e-36	2.60104e-35	0.0292208	SVZCs	0.364394	0.0320794	0.151983	0.0363133	0.0198187	0.124941
GABRA2	59.0417	2.1491	0	0	0.507024	ARPs	1.77304	0.81741	1.88847	0.904641	0.831849	1.92443
RBMS3-AS2	12.6575	2.1456	1.01718e-36	1.32804e-35	0.0383142	ARPs	0.157669	0.0413145	0.171122	0.0442595	0.115316	0.26396
MRVI1	64.6258	2.1417	0	0	0.506088	SVZCs	1.74912	1.72629	1.88872	0.820438	1.86625	2.43844
PRDM16-DT	24.3707	2.14118	3.49636e-131	1.44391e-128	0.215702	WMAs	0.69222	0.243439	0.773602	0.193196	0.234818	0.725694
PLCB1	71.3474	2.13682	0	0	0.731331	SVZCs	3.03766	1.88254	2.83265	1.53383	2.92141	2.55578
AL589740.1	55.7041	2.1349	0	0	0.637548	ARPs	2.79317	1.38231	2.64663	1.87333	1.40439	2.39754
FJX1	11.0651	2.13182	1.85207e-28	2.27993e-27	0.0294237	SVZCs	0.0689484	0.039128	0.125155	0.029967	0.0516646	0.169293
LMO3	58.3128	2.13166	0	0	0.533078	ARPs	2.1267	0.924944	2.03712	1.13217	1.53538	1.22266
AL158840.1	25.1993	2.12923	4.07471e-140	2.30967e-138	0.0794381	ARPs	0.246031	0.0952796	0.362792	0.0732845	0.391215	0.172539
TRIB1	7.12068	2.12673	1.07398e-12	3.29995e-11	0.0325139	WMAs	0.12502	0.0174577	0.136393	0.00990005	0.0329131	0.0861457
AL121827.2	10.5421	2.12567	5.5259e-26	8.06112e-25	0.0369508	AR1	0.0323735	0.0613321	0.134174	0.0303013	0.0764604	0.136042
MIR124-2HG	13.9781	2.12378	2.12145e-44	3.64142e-43	0.0290179	SVZCs	0.137899	0.0369593	0.142317	0.0344902	0.0392169	0.0814151
TUSC7	10.0625	2.12178	8.09462e-24	7.37014e-23	0.0311622	ARPs	0.106876	0.0317916	0.131545	0.0506813	0.0675743	0.223976
MIR193BHG	23.1818	2.12004	6.94777e-119	2.45686e-117	0.0625	SVZCs	0.251844	0.137754	0.265688	0.0676656	0.198124	0.333208
EPHA6	56.6385	2.12001	0	0	0.560409	ARPs	2.28217	1.11088	2.28797	1.30888	0.992409	1.89469
AC007389.1	51.3322	2.11908	0	0	0.315138	SVZCs	1.40102	0.720366	1.33228	0.496017	1.18529	1.21118
GABRA2	35.4737	2.11201	1.24933e-275	2.281e-272	0.546392	WMAs	1.77304	0.81741	1.88847	0.904641	0.831849	1.92443
AC036214.1	33.8108	2.11191	1.36845e-250	9.64872e-249	0.118304	SVZCs	0.351541	0.231361	0.519867	0.14646	0.548068	0.351303
PDZRN4	14.6677	2.1077	1.03785e-48	3.17207e-47	0.0560292	AR2	0.307669	0.359176	0.256383	1.13975	1.14677	0.0656065
AC106845.1	53.8439	2.1076	0	0	0.314732	SVZCs	1.48135	0.422048	1.22178	0.441672	0.968162	0.784142
ELOVL2	45.3126	2.10687	0	0	0.198661	SVZCs	0.685832	0.308665	0.753586	0.231967	0.440115	0.685862
AL353660.1	18.9431	2.10485	5.0297e-80	1.50155e-78	0.0541507	ARPs	0.21758	0.0672826	0.261884	0.132446	0.179765	0.0826798
NRSN1	17.9485	2.10218	4.93058e-72	2.14607e-70	0.0669915	AR2	0.130306	0.0475907	0.281461	0.0590002	0.282534	0.0729802
PCDH9-AS3	9.91627	2.10131	3.53732e-23	3.15936e-22	0.0283525	ARPs	0.126165	0.0290018	0.11891	0.0487799	0.0560717	0.157752
HSD17B6	20.6047	2.10041	2.49184e-94	7.3819e-93	0.0539773	SVZCs	0.197098	0.0343343	0.23828	0.060854	0.0724964	0.124666
P2RY14	37.0611	2.0995	1.19091e-300	1.71423e-298	0.185951	ARPs	1.00987	0.242757	0.778182	0.614209	0.390005	1.15527
MIAT	41.2005	2.09911	0	0	0.155811	ARPs	0.752699	0.214593	0.705824	0.281272	0.438902	0.662278
FNDC5	7.61354	2.09629	2.66689e-14	2.03373e-13	0.0158279	SVZCs	0.0676652	0.0226545	0.0705726	0.0169557	0.0470754	0.0478746
LINC02774	13.401	2.09472	5.96228e-41	9.59329e-40	0.0326705	SVZCs	0.0522798	0.0331643	0.154606	0.0383968	0.0840463	0.0800404
DNAH14	7.79181	2.09406	6.6055e-15	4.42792e-14	0.0247765	ARPs	0.111673	0.0309443	0.125911	0.0386205	0.0352059	0.136087
LINC02389	12.3138	2.09397	7.63686e-35	9.50566e-34	0.0314176	ARPs	0.11122	0.0416487	0.166837	0.0335237	0.0716801	0.108511
AL121820.2	11.3259	2.09345	9.76447e-30	1.05359e-28	0.0309068	ARPs	0.29036	0.0337089	0.136548	0.0804919	0.0682216	0.118277
AL589740.1	33.8845	2.09254	1.12759e-251	1.62983e-248	0.697066	WMAs	2.79317	1.38231	2.64663	1.87333	1.40439	2.39754
AKAP12	41.1548	2.0902	0	0	0.16092	ARPs	0.7837	0.231428	0.746118	0.162592	0.164128	1.09622
DACH1	32.8561	2.08859	9.32445e-237	6.12623e-235	0.135958	SVZCs	0.812278	0.174157	0.681224	0.206637	0.107871	0.491671
LINC00299	68.0675	2.08321	0	0	0.66599	SVZCs	2.22941	1.59997	2.39598	1.21043	2.18964	2.25905
PRDM16-DT	40.8347	2.0827	0	0	0.188506	ARPs	0.69222	0.243439	0.773602	0.193196	0.234818	0.725694
POLN	8.10455	2.08192	5.29423e-16	2.03837e-14	0.0523394	WMAs	0.164742	0.0593535	0.186457	0.0429601	0.047279	0.118062
CEMIP2	15.1873	2.08133	4.29086e-52	7.92599e-51	0.044189	ARPs	0.18333	0.0506206	0.198638	0.0599628	0.0688604	0.312948
HES5	10.9461	2.07963	6.93654e-28	1.32214e-26	0.0316687	AR2	0.0381997	0.0134897	0.175743	0.0121798	0.0528545	0.0444508
AL137017.1	9.90042	2.077	4.1455e-23	3.6921e-22	0.0250319	ARPs	0.0534842	0.0325095	0.13052	0.0238371	0.0569258	0.0514812
NDP	24.8563	2.07546	2.21327e-136	8.89669e-135	0.0801542	SVZCs	0.267978	0.127037	0.321831	0.0862477	0.19195	0.311343
TMEM132B	26.1273	2.07266	1.78604e-150	9.99319e-148	0.260111	WMAs	0.72985	0.83747	1.06769	0.753873	0.374129	0.98803
ADGRB1	17.9078	2.07231	1.02584e-71	2.48683e-70	0.0472808	SVZCs	0.256267	0.056421	0.216539	0.0558965	0.203132	0.168325
MEF2C-AS2	17.4371	2.07221	4.31411e-68	1.0705e-66	0.0633461	ARPs	0.184936	0.0744758	0.281527	0.103746	0.170854	0.188921
NHSL1	74.7367	2.07085	0	0	0.731331	SVZCs	2.61745	1.38419	2.57344	1.35651	2.22501	1.94654
BMPER	31.6355	2.07043	1.20019e-219	1.12526e-217	0.132567	ARPs	0.465776	0.181322	0.607038	0.140415	0.104962	0.522294
CC2D2B	35.3104	2.06808	4.06419e-273	3.09181e-271	0.147727	SVZCs	0.255746	0.162633	0.593925	0.176827	0.379708	0.655981
ZNF98	25.1821	2.06781	6.28882e-140	2.9481e-137	0.343378	WMAs	1.60289	0.565627	1.64436	0.20199	0.691382	1.43473
ETNPPL	65.4934	2.06718	0	0	0.611607	SVZCs	2.14628	0.925331	2.14818	1.03184	1.90503	1.30826
GFRA1	36.243	2.06689	1.28304e-287	1.73861e-285	0.177778	ARPs	0.775475	0.243361	0.76752	0.318811	0.274666	1.13964
KBTBD12	22.9275	2.06572	2.47215e-116	7.94063e-114	0.180016	WMAs	0.727754	0.280922	0.741219	0.261987	0.23301	0.799194
RNF144B	9.27736	2.06541	1.73734e-20	1.69914e-19	0.0217127	SVZCs	0.0779014	0.0318222	0.101623	0.0252351	0.119451	0.0559921
ALCAM	57.6394	2.06135	0	0	0.420049	SVZCs	1.48672	0.778892	1.57222	0.649509	1.13709	1.09492
AC008957.1	18.2339	2.06046	2.77777e-74	7.59944e-73	0.0590038	ARPs	0.217675	0.0680598	0.257565	0.076279	0.100696	0.724147
MERTK	59.5098	2.06032	0	0	0.418019	SVZCs	1.79747	0.456371	1.42938	0.566173	1.0951	0.919286
AC079352.1	40.5996	2.05974	0	0	0.189123	SVZCs	0.564919	0.286426	0.968286	0.330593	1.1444	0.623981
AC016723.1	12.3474	2.05927	5.03013e-35	7.18679e-34	0.0344968	SVZCs	0.148757	0.0316822	0.142763	0.0361581	0.0354594	0.204665
ADGRB1	16.5639	2.05845	1.27076e-61	2.81499e-60	0.0434227	ARPs	0.256267	0.056421	0.216539	0.0558965	0.203132	0.168325
AC021055.1	10.9699	2.05785	5.33249e-28	5.48752e-27	0.0260536	ARPs	0.134452	0.0306859	0.121993	0.0425339	0.0742619	0.0746934
LINC01237	28.596	2.05721	7.54336e-180	5.68868e-178	0.091954	ARPs	0.380181	0.113609	0.405947	0.189816	0.226719	0.227603
PDE4D	63.0014	2.05384	0	0	0.622565	SVZCs	2.64621	0.885971	2.41091	1.23638	2.17051	2.03512
ANKRD33B	11.879	2.0513	1.52178e-32	2.04932e-31	0.0257711	SVZCs	0.160479	0.0403401	0.130767	0.0331499	0.0608619	0.0926262
AL160254.1	25.655	2.04978	3.71771e-145	2.18589e-143	0.102427	ARPs	0.434012	0.11703	0.414789	0.180832	0.241384	0.576966
ZSCAN31	8.64702	2.04976	5.28601e-18	4.7115e-17	0.03125	SVZCs	0.304674	0.0242317	0.138784	0.0353257	0.0390965	0.0652865
MGAT4C	71.7744	2.04901	0	0	0.760755	SVZCs	2.89569	1.81328	3.00864	1.73238	2.79968	2.32902
RBMS3-AS2	13.4259	2.04412	4.26236e-41	6.87407e-40	0.0436282	SVZCs	0.157669	0.0413145	0.171122	0.0442595	0.115316	0.26396
ATL2	43.2024	2.04289	0	0	0.228097	ARPs	0.783051	0.27912	0.844461	0.402342	0.601008	0.589396
ADGRV1	71.7949	2.04104	0	0	0.868199	ARPs	4.2535	2.81577	4.18414	2.87645	1.76282	4.02428
ROBO1	50.3641	2.03964	0	0	0.357344	ARPs	1.46347	0.536421	1.36573	0.573672	0.684837	1.40106
CSPG5	24.5695	2.03859	2.6798e-133	1.41711e-131	0.083014	ARPs	0.26965	0.097957	0.352642	0.0694672	0.119863	0.20217
PLAGL1	16.7578	2.03789	4.96813e-63	7.27191e-61	0.111816	WMAs	0.322998	0.217797	0.447524	0.160533	0.128789	0.553145
F3	56.1131	2.03785	0	0	0.406047	SVZCs	0.964021	1.19893	1.44635	0.582702	0.623301	2.29607
AC079760.2	6.80735	2.03705	9.94134e-12	6.70683e-11	0.0190747	SVZCs	0.0416458	0.0244657	0.0813199	0.0204324	0.0384475	0.102001
AL122014.1	15.023	2.03689	5.19082e-51	9.3494e-50	0.0421456	ARPs	0.155835	0.0540615	0.205348	0.0971636	0.067089	0.0833898
NEDD9	22.7644	2.03633	1.03298e-114	4.64172e-113	0.0750958	ARPs	0.258817	0.0881299	0.320574	0.0897653	0.113744	0.532954
ADPGK-AS1	10.8901	2.03479	1.28463e-27	1.30685e-26	0.0303959	ARPs	0.0958552	0.034511	0.134428	0.0158707	0.0534134	0.281399
OLFM2	49.9673	2.03284	0	0	0.271104	SVZCs	0.994424	0.691465	1.00238	0.351702	0.523488	0.985471
CCDC190	12.4394	2.03266	1.59679e-35	3.7478e-34	0.0419001	AR2	0.168369	0.195997	0.165711	0.505223	0.126451	0.043107
WDR86	11.1698	2.02896	5.72975e-29	7.14982e-28	0.0263799	SVZCs	0.0579624	0.034749	0.111861	0.0285887	0.0251959	0.0837819
FSBP	7.98879	2.02885	1.36269e-15	9.38305e-15	0.0206897	ARPs	0.152102	0.0207729	0.082185	0.0371034	0.0544702	0.0478303
AC092969.1	14.264	2.0288	3.66662e-46	6.47633e-45	0.0420049	SVZCs	0.190033	0.0423925	0.186212	0.0489408	0.0526515	0.172024
FLRT2	56.0107	2.02754	0	0	0.581354	ARPs	2.90632	1.10373	2.22105	1.33092	2.03154	1.28585
LINC00903	13.7979	2.0262	2.62428e-43	4.00335e-42	0.0475096	ARPs	0.233162	0.0514862	0.194918	0.0751378	0.0930628	0.298729
LINC02231	8.64257	2.02597	5.49613e-18	4.89627e-17	0.0184659	SVZCs	0.0655411	0.0103907	0.0979016	0.0249412	0.021216	0.0445549
MIR124-2HG	12.6392	2.02224	1.28374e-36	1.67165e-35	0.0293742	ARPs	0.137899	0.0369593	0.142317	0.0344902	0.0392169	0.0814151
SYPL2	7.70194	2.01997	1.3402e-14	1.03706e-13	0.0186688	SVZCs	0.0837414	0.0219529	0.077304	0.0196227	0.0295311	0.0852156
DPP10	19.8288	2.01934	1.67863e-87	3.61686e-85	0.672482	WMAs	2.97949	4.90545	3.93936	4.39643	2.5974	4.3329
AC008957.2	39.8992	2.01927	0	0	0.232346	SVZCs	0.653588	0.236882	0.818078	0.271808	0.284001	1.77847
AC005165.1	9.01915	2.01925	1.89561e-19	1.49895e-18	0.0240102	ARPs	0.15276	0.0303554	0.117729	0.0826682	0.0628766	0.0483581
NKAIN4	33.8324	2.01899	6.57647e-251	4.65587e-249	0.124188	SVZCs	0.274764	0.341651	0.475583	0.139976	0.261783	0.465323
CDS1	28.8814	2.01899	2.04512e-183	1.59427e-181	0.104981	ARPs	0.549441	0.129273	0.444249	0.203087	0.249885	0.358888
ACSM6	7.00653	2.01863	2.44304e-12	1.70008e-11	0.0196834	SVZCs	0.0950379	0.0177817	0.0833686	0.0212297	0.0386209	0.0886107
AL590807.1	7.32042	2.01812	2.47199e-13	1.55378e-12	0.0234994	ARPs	0.0717068	0.0302544	0.117268	0.049815	0.0278286	0.0698448
NHSL1	61.821	2.01732	0	0	0.680715	ARPs	2.61745	1.38419	2.57344	1.35651	2.22501	1.94654
NEDD9	24.8283	2.00861	4.43986e-136	1.77441e-134	0.0773133	SVZCs	0.258817	0.0881299	0.320574	0.0897653	0.113744	0.532954
KCNIP1	31.1574	2.00826	4.02978e-213	3.67876e-211	0.124649	ARPs	0.362025	0.190343	0.611653	0.136985	0.421423	0.732548
B3GALT1	7.96968	2.0075	1.59091e-15	1.28256e-14	0.0198864	SVZCs	0.0686173	0.0242648	0.0788592	0.0202013	0.0156556	0.0568171
LINC01344	7.50699	2.00682	6.05043e-14	4.54404e-13	0.0198864	SVZCs	0.0416952	0.0356496	0.0928689	0.0239262	0.0641876	0.126765
LINC00499	24.2042	2.00361	2.00814e-129	7.91617e-127	0.418715	WMAs	2.10579	0.631415	2.20259	0.452389	1.10097	1.21809
DIAPH3	26.2768	2.00272	3.53559e-152	3.73931e-150	0.111815	AR2	0.567645	0.150055	0.425939	0.351066	0.29001	0.124433
AC073050.1	57.7934	1.99964	0	0	0.513799	SVZCs	2.02267	1.24544	2.00925	0.961199	0.737455	1.68644
F11-AS1	39.6812	1.99714	0	0	0.212261	ARPs	0.702264	0.339682	0.961186	0.219017	0.556843	0.525504
FAM171B	54.128	1.99634	0	0	0.485824	ARPs	1.93275	0.763342	1.71742	0.954227	0.992551	1.10461
AL713852.1	20.9939	1.99341	7.45963e-98	2.80059e-96	0.0733078	ARPs	0.287205	0.0796064	0.285129	0.0656085	0.137356	0.187701
AC079760.1	22.8447	1.98834	1.64988e-115	5.65558e-114	0.0762987	SVZCs	0.171509	0.134317	0.366173	0.105664	0.142696	0.273164
ZFPM2-AS1	19.0808	1.97849	3.64534e-81	1.11122e-79	0.0720307	ARPs	0.391585	0.084279	0.297526	0.157184	0.259318	0.314532
RHOJ	48.2805	1.97832	0	0	0.317241	ARPs	1.30153	0.476756	1.22581	0.390457	0.564197	1.0074
IFIT1	8.58598	1.97824	9.0063e-18	6.70591e-17	0.0232439	ARPs	0.118537	0.0275397	0.104376	0.0500712	0.0571822	0.0520389
EPB41L4A	11.19	1.97691	4.56399e-29	3.08626e-27	0.0674068	WMAs	0.355029	0.293877	0.308491	0.434501	0.0878275	0.426948
MIR181A1HG	17.4021	1.97136	7.95731e-68	1.85261e-66	0.0541802	SVZCs	0.284183	0.0910326	0.226056	0.0626771	0.128284	0.090516
TDRD10	12.2526	1.96864	1.62602e-34	2.00522e-33	0.0303959	ARPs	0.210835	0.0361754	0.134691	0.0626387	0.0635389	0.13207
CDH10	42.7661	1.96801	0	0	0.257471	ARPs	1.38702	0.39185	1.05667	0.540247	0.97873	0.48433
MAP1LC3B2	6.96273	1.96787	3.33732e-12	2.96051e-11	0.0285132	AR1	0.0253143	0.276711	0.0955748	0.176033	0.10808	0.187907
C2CD6	20.1382	1.96675	3.41537e-90	1.16156e-88	0.0722861	ARPs	0.287004	0.0906519	0.31547	0.157985	0.130355	0.208616
AL365259.1	15.8925	1.96512	7.14259e-57	2.07692e-55	0.0759383	AR1	0.0796388	0.163565	0.280403	0.294639	0.204693	0.1293
SAT1	46.5712	1.96491	0	0	0.302937	ARPs	1.29284	0.433766	1.13784	0.366879	0.682077	1.36276
SEMA4A	21.9796	1.96099	4.50981e-107	1.88035e-105	0.0651341	ARPs	0.220096	0.0788333	0.277134	0.0505174	0.136746	0.142152
AC095060.1	8.23895	1.95981	1.73727e-16	6.88755e-15	0.0570975	WMAs	0.093548	0.0807438	0.215993	0.0726276	0.0601315	0.153743
PIK3C2A	65.5374	1.95609	0	0	0.627029	SVZCs	2.31048	0.753586	1.94701	0.935446	1.44903	1.59028
SDS	25.6949	1.95076	1.33444e-145	5.65221e-144	0.0742695	SVZCs	0.244447	0.104084	0.312989	0.0908151	0.237757	0.63639
ADGRV1	80.6524	1.9481	0	0	0.916396	SVZCs	4.2535	2.81577	4.18414	2.87645	1.76282	4.02428
MIR2052HG	24.8521	1.94748	2.45525e-136	9.84655e-135	0.0913149	SVZCs	0.185901	0.13067	0.42823	0.12979	0.227278	0.189511
MMD2	48.4596	1.94718	0	0	0.293425	SVZCs	0.704227	0.802271	1.08658	0.411671	0.813215	0.883656
AC008957.2	21.0975	1.94676	8.38438e-99	2.09247e-96	0.244251	WMAs	0.653588	0.236882	0.818078	0.271808	0.284001	1.77847
LSAMP-AS1	19.4301	1.94648	4.29328e-84	1.34782e-82	0.0766284	ARPs	0.351718	0.0853351	0.295168	0.168453	0.155168	0.389179
NLGN4X	43.8388	1.94526	0	0	0.272286	ARPs	1.19958	0.42363	1.10903	0.212377	0.593615	1.25547
LUCAT1	37.5528	1.94511	0	1.858e-306	0.220179	ARPs	1.03149	0.301163	0.855795	0.430968	0.241827	1.20623
AL445259.1	39.3605	1.94425	0	0	0.183644	SVZCs	1.11848	0.149531	0.726084	0.244711	0.455353	0.375035
WNT5B	15.5021	1.94324	3.35935e-54	6.48864e-53	0.0508301	ARPs	0.281697	0.061712	0.218976	0.0934658	0.172458	0.251763
RBP1	7.58338	1.94305	3.36656e-14	2.19316e-13	0.0209451	ARPs	0.114989	0.0235873	0.0878052	0.0309219	0.0429633	0.0727152
MIR2052HG	22.6457	1.93709	1.53894e-113	6.85314e-112	0.0896552	ARPs	0.185901	0.13067	0.42823	0.12979	0.227278	0.189511
MIR124-2HG	7.183	1.93506	6.82001e-13	2.12757e-11	0.035686	WMAs	0.137899	0.0369593	0.142317	0.0344902	0.0392169	0.0814151
OMG	23.9268	1.93453	1.61112e-126	7.89403e-125	0.0891443	ARPs	0.465628	0.104503	0.351421	0.138045	0.157409	0.251692
CELF2-AS2	13.7331	1.93429	6.4306e-43	9.69481e-42	0.0490421	ARPs	0.255254	0.0543983	0.193644	0.0916704	0.0975053	0.228361
AC115622.1	31.5254	1.93259	3.90065e-218	2.34512e-216	0.143466	SVZCs	0.355738	0.235408	0.595443	0.193253	0.58314	0.416175
GABRA2	61.7931	1.93097	0	0	0.578328	SVZCs	1.77304	0.81741	1.88847	0.904641	0.831849	1.92443
SOX5-AS1	9.37667	1.92859	6.80915e-21	5.62537e-20	0.0324393	ARPs	0.118064	0.0348357	0.126589	0.0592533	0.0822014	0.209543
LINC02698	32.6909	1.92794	2.10653e-234	1.36081e-232	0.139002	SVZCs	0.572581	0.120987	0.573587	0.185296	0.486664	0.435053
SPRED1	54.5145	1.92261	0	0	0.415787	SVZCs	1.53465	0.645338	1.35398	0.564051	0.91522	1.54519
PCDH7	56.6345	1.92082	0	0	0.527192	SVZCs	1.93669	1.10758	1.99499	0.984931	1.81223	1.42572
CALN1	21.9273	1.9208	1.42575e-106	3.98865e-104	0.264076	WMAs	0.642036	0.7906	1.08741	0.302605	0.41831	1.64134
AC092969.1	7.4725	1.92066	7.86872e-14	2.60712e-12	0.0467883	WMAs	0.190033	0.0423925	0.186212	0.0489408	0.0526515	0.172024
ARHGAP29	19.8566	1.91842	9.6543e-88	3.1896e-86	0.0699872	ARPs	0.31597	0.0891611	0.301969	0.0359181	0.108553	0.385887
AC005162.3	35.2761	1.91796	1.36709e-272	3.41181e-270	0.189525	AR2	0.858055	0.442311	0.653426	0.492359	0.720835	0.218346
NT5E	28.7297	1.91577	1.62636e-181	1.2482e-179	0.106769	ARPs	0.484076	0.130135	0.421603	0.0803269	0.237957	0.198936
GNA14-AS1	20.549	1.91387	7.86415e-94	1.80667e-91	0.218874	WMAs	0.800536	0.178842	0.801028	0.126953	0.282047	1.8371
ROBO1	53.1395	1.91343	0	0	0.381899	SVZCs	1.46347	0.536421	1.36573	0.573672	0.684837	1.40106
SNCG	10.4292	1.91245	1.82326e-25	1.74576e-24	0.0298851	ARPs	0.279746	0.0358252	0.128664	0.0131051	0.036059	0.172714
DNM3	43.6806	1.91203	0	0	0.333333	ARPs	1.44891	0.499267	1.23455	0.528462	0.390121	1.30035
CACNA1B	34.6691	1.91133	2.30334e-263	1.71834e-261	0.142248	SVZCs	0.691657	0.254692	0.549561	0.177921	0.493794	0.400733
LYN	7.10538	1.91127	1.19988e-12	8.48257e-12	0.0196834	SVZCs	0.0622452	0.0240358	0.084403	0.0231436	0.0161736	0.111175
ASRGL1	38.6036	1.91046	0	0	0.182224	SVZCs	0.637534	0.246203	0.63341	0.211199	0.458236	0.905269
F3	29.1456	1.90847	9.50748e-187	8.04426e-184	0.454401	WMAs	0.964021	1.19893	1.44635	0.582702	0.623301	2.29607
MGAT4C	59.4944	1.90842	0	0	0.753257	ARPs	2.89569	1.81328	3.00864	1.73238	2.79968	2.32902
CYP2J2	39.3446	1.90731	0	0	0.184456	SVZCs	0.614857	0.141231	0.65706	0.221295	0.669916	0.4601
COL23A1	19.5481	1.89872	4.28158e-85	1.36892e-83	0.0605364	ARPs	0.251695	0.086603	0.29067	0.0594299	0.351531	0.26404
COL5A3	49.7961	1.8952	0	0	0.366274	SVZCs	1.41513	0.77997	1.24841	0.511626	0.717933	0.940195
EPHB1	46.9865	1.89486	0	0	0.418902	ARPs	1.49022	0.693041	1.5514	0.571719	0.498885	1.17329
KIAA0319	46.437	1.89448	0	0	0.32567	ARPs	1.31605	0.479185	1.18955	0.676414	0.91298	0.855436
EAF2	34.7105	1.89422	5.47404e-264	6.63967e-262	0.171137	ARPs	0.88119	0.216241	0.640453	0.472476	0.626733	0.362596
TRDN	25.3199	1.89276	1.9285e-141	1.10214e-139	0.103959	ARPs	0.693479	0.138963	0.440579	0.405998	0.34577	0.348627
NCR3LG1	9.64303	1.89067	5.2613e-22	5.41587e-21	0.0280032	SVZCs	0.132627	0.0325956	0.0988477	0.0276341	0.0830747	0.0856551
AC008957.1	18.6858	1.88998	6.45731e-78	1.66794e-76	0.0734578	SVZCs	0.217675	0.0680598	0.257565	0.076279	0.100696	0.724147
RGS20	59.8031	1.88942	0	0	0.599432	SVZCs	2.0437	1.39063	2.01163	1.01082	1.15932	2.3494
PREX2	66.6888	1.88762	0	0	0.805109	ARPs	2.89363	1.72139	2.88996	1.98324	2.136	2.69141
LINC01102	8.48467	1.88625	2.16332e-17	1.58927e-16	0.0250319	ARPs	0.0854078	0.0306541	0.108922	0.043706	0.0862078	0.0445114
RUBCNL	18.3811	1.88428	1.86325e-75	5.2126e-74	0.0592593	ARPs	0.291896	0.0730275	0.246612	0.0266757	0.193382	0.254496
C1QTNF7	10.5083	1.88292	7.90999e-26	9.16185e-25	0.033888	SVZCs	0.0850345	0.0736223	0.141572	0.0404074	0.102058	0.328071
MAST4	66.8526	1.88275	0	0	0.725446	SVZCs	2.50852	1.49904	2.47205	1.3715	1.77764	2.5142
CA8	28.3612	1.88123	6.08464e-177	5.02562e-174	0.438541	WMAs	1.77141	0.815487	1.54587	0.874944	0.694253	1.55359
SLC1A3	83.8233	1.88104	0	0	0.939732	SVZCs	3.48194	2.47547	3.52458	2.29684	2.73979	4.21872
AC107223.1	21.3496	1.8785	3.93578e-101	1.55681e-99	0.0916986	ARPs	0.230071	0.122216	0.390685	0.0899004	0.224684	0.326552
FMO5	14.1641	1.87751	1.52713e-45	2.44242e-44	0.0485313	ARPs	0.186053	0.054253	0.186359	0.0947749	0.114522	0.137194
FREM2	24.1914	1.8771	2.74234e-129	1.37077e-127	0.105492	ARPs	0.370786	0.13852	0.435515	0.097882	0.0981285	0.253051
KBTBD12	40.0215	1.87485	0	0	0.202516	SVZCs	0.727754	0.280922	0.741219	0.261987	0.23301	0.799194
AL590867.1	12.3833	1.87162	3.21682e-35	4.0461e-34	0.0472542	ARPs	0.0270674	0.0651868	0.220334	0.0534967	0.117396	0.156209
GFRA1	20.3968	1.86875	1.78464e-92	4.02007e-90	0.197462	WMAs	0.775475	0.243361	0.76752	0.318811	0.274666	1.13964
SARDH	7.40749	1.86751	1.28716e-13	8.17647e-13	0.0183908	ARPs	0.0832112	0.0220488	0.0782102	0.0368958	0.0613606	0.0588746
SLC1A4	43.6151	1.86622	0	0	0.270498	ARPs	0.982695	0.358726	0.945135	0.226377	0.686598	0.580754
AC104459.1	7.77197	1.86585	7.72768e-15	6.04449e-14	0.0200893	SVZCs	0.0518378	0.0256486	0.0798818	0.0225592	0.0490228	0.0873068
SCML1	11.8798	1.86511	1.50754e-32	1.10563e-30	0.0880254	WMAs	0.250569	0.0920816	0.285637	0.0697252	0.086868	0.551922
FAT3	51.0056	1.86459	0	0	0.58825	ARPs	2.20326	1.19645	2.24137	0.660546	2.32861	2.28709
LYVE1	29.7865	1.86273	5.84857e-195	3.22555e-193	0.125	SVZCs	0.378561	0.400979	0.435341	0.13975	0.414759	0.501341
KCND3	35.7521	1.8624	6.12683e-280	4.78693e-278	0.17289	SVZCs	0.711887	0.566501	0.682329	0.238308	0.594054	1.28259
SLC4A4	56.9073	1.86189	0	0	0.733589	ARPs	2.48057	1.57416	2.70199	1.21491	2.51387	2.66586
CADM1	68.1504	1.86165	0	0	0.854662	ARPs	3.37219	2.00738	3.19533	2.08465	2.4393	3.27196
PTN	26.7484	1.85905	1.29051e-157	7.99425e-155	0.369548	WMAs	1.24548	0.308238	1.2818	0.193049	0.540914	1.16389
APOL3	9.9964	1.85772	1.58042e-23	1.70687e-22	0.0310471	SVZCs	0.0764736	0.0473616	0.110367	0.0316881	0.0510297	0.170033
GABRB1	67.0518	1.85767	0	0	0.840358	ARPs	3.33936	2.09809	3.2927	2.15822	2.66888	2.9459
SYPL2	6.91588	1.85639	4.64954e-12	2.78235e-11	0.0191571	ARPs	0.0837414	0.0219529	0.077304	0.0196227	0.0295311	0.0852156
ZBTB20-AS2	8.72779	1.85622	2.59699e-18	1.97609e-17	0.0316731	ARPs	0.157768	0.0342515	0.118812	0.0942651	0.071824	0.135969
AP001528.1	22.6426	1.85604	1.64942e-113	5.59867e-112	0.0874594	SVZCs	0.124217	0.17666	0.322972	0.100124	0.218935	0.474809
AL354754.1	7.45814	1.85503	8.77509e-14	5.61963e-13	0.0260536	ARPs	0.0856035	0.0276643	0.0966509	0.0364207	0.111358	0.134672
CXXC4	14.2117	1.85462	7.75669e-46	2.22564e-44	0.0574909	AR2	0.277243	0.106357	0.191772	0.239212	0.24023	0.0568074
SLCO1C1	50.1642	1.85265	0	0	0.496807	ARPs	1.52152	0.807141	1.7018	0.842174	0.822979	1.41189
LRP4-AS1	13.544	1.85238	8.60094e-42	8.19688e-40	0.131642	WMAs	0.479534	0.0750128	0.396139	0.127708	0.12629	0.302122
AP000462.1	34.1773	1.84983	5.25232e-256	3.7959e-254	0.198255	SVZCs	0.960824	0.12736	0.674225	0.236672	0.256144	1.01834
AC091826.2	48.3434	1.8427	0	0	0.451341	ARPs	1.1005	0.75071	1.61181	0.934934	1.19867	1.13175
AP000962.1	10.4828	1.84149	1.03589e-25	9.96806e-25	0.0408685	ARPs	0.196512	0.0429965	0.146221	0.115392	0.0849266	0.203755
RBMS3-AS3	23.0153	1.83973	3.2754e-117	1.50694e-115	0.104215	ARPs	0.353063	0.133123	0.411896	0.170507	0.291466	0.671882
HSD17B6	10.027	1.83936	1.15983e-23	6.34612e-22	0.0769231	WMAs	0.197098	0.0343343	0.23828	0.060854	0.0724964	0.124666
SLC30A10	24.2437	1.83878	7.69939e-130	3.8709e-128	0.0952746	ARPs	0.295653	0.117594	0.369061	0.147215	0.274356	0.216518
LRP4-AS1	25.7133	1.83523	8.30849e-146	3.53213e-144	0.116883	SVZCs	0.479534	0.0750128	0.396139	0.127708	0.12629	0.302122
CACNB2	45.5647	1.8306	0	0	0.524138	ARPs	2.19639	1.02158	1.99096	0.817888	1.68961	1.95955
CEMIP2	15.8156	1.83019	2.42783e-56	4.99239e-55	0.0519481	SVZCs	0.18333	0.0506206	0.198638	0.0599628	0.0688604	0.312948
RFTN2	49.8966	1.82883	0	0	0.425579	AR2	1.73316	0.888143	1.28916	1.28091	1.26452	0.554028
SLC1A2	40.9827	1.82358	0	0	0.979381	WMAs	3.93361	2.58779	4.36221	2.1344	3.13006	3.86696
LINC00173	11.1648	1.82055	6.06322e-29	9.64831e-28	0.0532441	AR1	0.0476791	0.230588	0.159129	0.171646	0.140735	0.259368
AL445209.1	6.92249	1.81689	4.43781e-12	3.04288e-11	0.0178571	SVZCs	0.0530957	0.0166703	0.0631141	0.0183223	0.0422319	0.046441
EPHB2	8.1732	1.81679	3.00313e-16	1.17318e-14	0.0555115	WMAs	0.22883	0.107144	0.177003	0.0600697	0.0535065	0.233823
BRINP3	51.4278	1.8155	0	0	0.431615	SVZCs	1.61327	0.561944	1.5187	0.699727	1.23365	0.888559
AP003025.2	22.5995	1.81521	4.38503e-113	1.94523e-111	0.100128	ARPs	0.342285	0.117141	0.362801	0.188015	0.173937	0.441247
ZNF703	13.5935	1.81355	4.37863e-42	7.17499e-41	0.0424107	SVZCs	0.17506	0.0499862	0.147467	0.0442122	0.0673601	0.0991441
SLCO1C1	30.9701	1.81166	1.36149e-210	1.40166e-207	0.573354	WMAs	1.52152	0.807141	1.7018	0.842174	0.822979	1.41189
PDGFRB	39.9924	1.81127	0	0	0.222989	ARPs	0.802026	0.292485	0.784979	0.500993	0.630715	0.643605
AC022395.1	10.6617	1.81122	1.53824e-26	1.51811e-25	0.0418902	ARPs	0.18409	0.0441907	0.147178	0.0749126	0.0628492	0.225479
AC009879.4	31.2871	1.81032	6.98438e-215	6.42674e-213	0.154278	ARPs	0.415648	0.207685	0.593078	0.151862	0.310978	0.438682
DNM3	46.2675	1.80719	0	0	0.370739	SVZCs	1.44891	0.499267	1.23455	0.528462	0.390121	1.30035
DNMBP-AS1	8.95749	1.80444	3.32152e-19	2.60804e-18	0.0298851	ARPs	0.12281	0.0330173	0.110873	0.040139	0.218987	0.0636167
PTPRG	50.4934	1.80118	0	0	0.442979	SVZCs	1.37362	1.10218	1.65269	0.793527	0.820416	1.58287
AC005856.1	7.22307	1.80108	5.08265e-13	3.15641e-12	0.0247765	ARPs	0.100773	0.0268485	0.0905987	0.0444589	0.0516148	0.0908189
AP000857.2	7.14028	1.80053	9.31415e-13	5.72379e-12	0.0265645	ARPs	0.0767965	0.0279077	0.0940232	0.0528843	0.0278178	0.154035
AL109809.5	50.0425	1.80008	0	0	0.550192	ARPs	2.04485	0.939639	1.86086	1.04074	1.40263	1.38538
GNA14	30.3938	1.79756	6.63845e-203	6.06021e-200	0.590801	WMAs	1.7949	0.85679	2.01806	0.462409	1.05661	2.85282
AL353660.1	17.431	1.7963	4.80045e-68	1.98958e-66	0.0738124	AR2	0.21758	0.0672826	0.261884	0.132446	0.179765	0.0826798
HPSE2	41.4817	1.79584	0	0	0.614815	ARPs	2.90651	1.56144	2.64441	1.83682	3.54789	1.78088
MIR3659HG	19.2323	1.79098	1.9877e-82	5.3328e-81	0.0679789	SVZCs	0.256644	0.12462	0.243244	0.0765703	0.237972	0.212882
TMEM72-AS1	23.2152	1.79016	3.19912e-119	2.10583e-117	0.152168	AR1	0.147785	0.360982	0.438783	0.283529	0.448023	0.500898
STXBP6	36.3612	1.78727	1.74741e-289	2.39596e-287	0.232439	ARPs	0.857313	0.352405	0.899448	0.456382	0.459125	0.840513
FGL1	14.3675	1.78692	8.2816e-47	2.42643e-45	0.0718636	AR2	0.240879	0.020279	0.237646	0.0133917	0.0275411	0.0748653
NCAN	36.7993	1.78669	1.89178e-296	1.57754e-294	0.177151	SVZCs	0.70243	0.819197	0.692163	0.254073	0.513327	0.631321
PDE4B	61.8217	1.78584	0	0	0.719562	SVZCs	2.49171	1.9885	2.50867	1.45249	2.47404	2.61124
DGKG	49.1752	1.78317	0	0	0.45414	SVZCs	1.543	1.57289	1.58601	0.755437	2.03132	1.49467
RYR3	47.2558	1.78081	0	0	0.584213	SVZCs	2.08326	2.58977	2.37635	1.34599	2.89772	2.58815
LINC01239	12.3768	1.77942	3.49169e-35	4.99905e-34	0.0428166	SVZCs	0.0695776	0.0700442	0.182488	0.0566814	0.134457	0.152571
SCML1	20.1876	1.77721	1.25949e-90	4.3131e-89	0.0804598	ARPs	0.250569	0.0920816	0.285637	0.0697252	0.086868	0.551922
AC055874.1	10.1682	1.77499	2.74909e-24	3.04392e-23	0.0310471	SVZCs	0.0898005	0.0603415	0.111227	0.033799	0.138295	0.0987119
SYCP2L	15.498	1.77112	3.5773e-54	9.91187e-53	0.0951411	AR1	0.0937186	0.206066	0.289192	0.144084	0.257636	0.226394
DNAH14	7.94117	1.76879	2.00288e-15	1.60796e-14	0.0306412	SVZCs	0.111673	0.0309443	0.125911	0.0386205	0.0352059	0.136087
SPRY4-AS1	26.5985	1.76836	7.06141e-156	3.23167e-154	0.137175	SVZCs	0.373922	0.191897	0.45246	0.155256	0.28384	0.530016
RORB	47.9412	1.7665	0	0	0.484802	ARPs	1.66846	0.826932	1.682	0.605138	1.14942	1.18274
AC002429.2	26.3691	1.76442	3.09753e-153	1.76153e-150	0.613799	WMAs	2.17881	1.10855	2.38392	1.47299	1.3606	1.61603
ANKRD33B	10.2255	1.76288	1.52468e-24	1.41914e-23	0.0309068	ARPs	0.160479	0.0403401	0.130767	0.0331499	0.0608619	0.0926262
SLCO1C1	54.8185	1.76265	0	0	0.550731	SVZCs	1.52152	0.807141	1.7018	0.842174	0.822979	1.41189
SLC16A6	7.68548	1.76232	1.52426e-14	1.17687e-13	0.0241477	SVZCs	0.0647847	0.0724892	0.0793434	0.0240497	0.0985975	0.109955
LINC01182	19.6079	1.76089	1.32291e-85	6.73887e-84	0.102558	AR2	0.312208	0.202913	0.374539	0.356901	0.235494	0.1258
KBTBD12	34.9347	1.7599	2.20908e-267	2.75658e-265	0.205875	ARPs	0.727754	0.280922	0.741219	0.261987	0.23301	0.799194
GABRB1	75.3214	1.7592	0	0	0.890422	SVZCs	3.33936	2.09809	3.2927	2.15822	2.66888	2.9459
ABHD2	48.5403	1.7591	0	0	0.342735	SVZCs	1.22045	0.573592	1.05807	0.441897	0.947531	1.12587
GLUD1	55.5321	1.75814	0	0	0.628352	ARPs	1.96123	1.0765	2.02066	1.1343	1.50144	1.85554
XKR6	41.9139	1.75806	0	0	0.271104	SVZCs	1.07786	0.261981	0.976132	0.398137	0.52673	1.00057
IGSF10	20.0735	1.75776	1.25708e-89	4.24202e-88	0.0909323	ARPs	0.507217	0.106304	0.321572	0.252642	0.166988	0.431071
AC246817.1	8.97706	1.75745	2.781e-19	2.59336e-18	0.0296266	SVZCs	0.090029	0.0412283	0.116653	0.0359417	0.0586684	0.094035
LINC00499	39.4654	1.7573	0	0	0.546163	AR2	2.10579	0.631415	2.20259	0.452389	1.10097	1.21809
HTRA1	43.7978	1.7569	0	0	0.338186	ARPs	1.31047	0.468245	1.1047	0.272277	0.727667	0.777692
LINC02406	24.6372	1.75634	5.04247e-134	3.92205e-132	0.167297	AR1	0.170382	0.123261	0.487085	0.186239	0.312823	0.348769
STUM	23.0354	1.75557	2.06045e-117	1.33353e-115	0.154786	AR1	0.166861	0.609351	0.478193	0.283149	0.684105	0.667779
STK17B	29.1185	1.75434	2.09159e-186	1.10437e-184	0.13819	SVZCs	0.697412	0.109841	0.46362	0.161122	0.26987	0.279046
ZFHX4-AS1	15.7119	1.75421	1.25454e-55	2.48971e-54	0.0641124	ARPs	0.250059	0.0801945	0.248166	0.0477953	0.119461	0.177212
CD47	48.1681	1.75289	0	0	0.360998	SVZCs	1.06527	0.459338	1.08481	0.458195	0.846147	1.16116
XAF1	23.0101	1.75142	3.6891e-117	1.69503e-115	0.0855683	ARPs	0.305523	0.110155	0.330797	0.0708654	0.249371	0.410468
ADRB1	15.0768	1.7512	2.30106e-51	4.17052e-50	0.053129	ARPs	0.187467	0.058262	0.183952	0.0263555	0.136381	0.149443
AC091078.1	34.4311	1.74946	8.64187e-260	1.60314e-257	0.308699	AR1	0.38511	1.00761	0.947611	1.14562	1.07303	0.865878
CD47	43.5639	1.7484	0	0	0.349425	ARPs	1.06527	0.459338	1.08481	0.458195	0.846147	1.16116
PTCH1	39.9487	1.74827	0	0	0.232955	SVZCs	0.783441	0.196036	0.75552	0.289659	0.745492	0.352317
TSPOAP1-AS1	8.9236	1.74782	4.51388e-19	3.52831e-18	0.0293742	ARPs	0.0891245	0.0340021	0.109894	0.0601203	0.0458253	0.109751
HEPN1	36.4635	1.74739	4.20225e-291	5.80781e-289	0.255683	ARPs	1.09635	0.338975	0.856448	0.544639	0.464279	0.864467
SLC6A1	53.3193	1.74711	0	0	0.438109	SVZCs	1.08184	0.849148	1.3138	0.593529	1.34526	0.997827
BHMT2	21.0123	1.74703	5.06313e-98	1.91121e-96	0.0827586	ARPs	0.519935	0.0998702	0.301986	0.169435	0.243134	0.268024
STOX1	49.1213	1.74698	0	0	0.377638	SVZCs	1.32011	0.603	1.1951	0.522591	0.942	1.18788
ACSL6	51.6062	1.74566	0	0	0.42289	SVZCs	0.951657	0.64644	1.28093	0.573974	0.911533	1.05504
RFX3-AS1	39.3333	1.74512	0	0	0.388711	AR1	0.463986	0.98691	1.09164	1.0661	1.13004	0.930257
POLN	13.345	1.745	1.26636e-40	1.8108e-39	0.0510856	ARPs	0.164742	0.0593535	0.186457	0.0429601	0.047279	0.118062
SDS	22.5533	1.74429	1.24773e-112	5.51386e-111	0.0799489	ARPs	0.244447	0.104084	0.312989	0.0908151	0.237757	0.63639
CPED1	21.5913	1.74394	2.16615e-103	1.38642e-101	0.11352	AR2	0.691496	0.04854	0.399396	0.0381428	0.209122	0.136772
WDR86	9.70488	1.74297	2.87423e-22	2.49206e-21	0.0301405	ARPs	0.0579624	0.034749	0.111861	0.0285887	0.0251959	0.0837819
AL359232.1	12.1107	1.74207	9.26504e-34	1.68099e-32	0.0712831	AR1	0.0845922	0.156851	0.258732	0.174394	0.263049	0.21766
LRRC7	34.7583	1.74155	1.03691e-264	1.27104e-262	0.26871	ARPs	0.833303	0.379156	0.932845	0.446459	0.687791	0.933506
FJX1	9.524	1.74035	1.66644e-21	1.40415e-20	0.0339719	ARPs	0.0689484	0.039128	0.125155	0.029967	0.0516646	0.169293
B3GALT1	6.84214	1.74013	7.80177e-12	4.61849e-11	0.0237548	ARPs	0.0686173	0.0242648	0.0788592	0.0202013	0.0156556	0.0568171
AC074286.1	10.3147	1.73776	6.04403e-25	6.83178e-24	0.0357143	SVZCs	0.0465658	0.0324105	0.140504	0.0442381	0.0817396	0.118693
LRRN3	25.6804	1.73586	1.93676e-145	1.14262e-143	0.113155	ARPs	0.360213	0.141263	0.409038	0.179953	0.288208	0.283401
SERPINB9	23.1219	1.73377	2.78866e-118	9.82116e-117	0.0957792	SVZCs	0.495964	0.111979	0.313717	0.105077	0.26878	0.253183
CADM1	76.3479	1.73361	0	0	0.904424	SVZCs	3.37219	2.00738	3.19533	2.08465	2.4393	3.27196
C5orf64	22.8795	1.73309	7.43197e-116	5.41628e-114	0.11961	AR2	0.376007	0.24803	0.413409	0.254153	0.746482	0.143236
CSPG5	12.94	1.73134	2.67651e-38	2.31541e-36	0.117367	WMAs	0.26965	0.097957	0.352642	0.0694672	0.119863	0.20217
PTPRG	26.8933	1.73112	2.62921e-159	1.65831e-156	0.469469	WMAs	1.37362	1.10218	1.65269	0.793527	0.820416	1.58287
ADGRL3	76.7285	1.73111	0	0	0.905641	SVZCs	3.45287	2.37697	3.37614	2.25252	3.16973	3.20322
MCF2L2	9.87411	1.72854	5.39107e-23	2.86395e-21	0.0927835	WMAs	0.289686	0.149215	0.303432	0.208191	0.101629	0.351132
RORB-AS1	12.2701	1.72705	1.31145e-34	1.62248e-33	0.0431673	ARPs	0.191261	0.0482364	0.15152	0.0557123	0.0810276	0.0819431
SLITRK2	33.9227	1.72673	3.08813e-252	2.20426e-250	0.168628	SVZCs	0.664923	0.124022	0.514693	0.18513	0.362453	0.37834
PELI2	36.0168	1.72665	4.57278e-284	1.1838e-281	0.258709	AR2	0.932564	0.64391	0.811415	1.02128	0.888207	0.320648
RNF144B	8.07214	1.72603	6.90772e-16	4.8215e-15	0.0247765	ARPs	0.0779014	0.0318222	0.101623	0.0252351	0.119451	0.0559921
CHST7	14.7554	1.72189	2.84088e-49	5.25041e-48	0.0527597	SVZCs	0.178999	0.0687616	0.172585	0.0555348	0.100553	0.180942
CADM2	74.3623	1.72127	0	0	0.955811	ARPs	4.23145	2.85543	4.00762	3.05846	3.99778	3.40054
MT-CO3	45.1882	1.72125	0	0	0.473823	SVZCs	1.70041	1.81996	1.61009	0.794865	1.35328	1.09219
AP000462.1	17.7057	1.72114	3.78799e-70	6.28734e-68	0.211737	WMAs	0.960824	0.12736	0.674225	0.236672	0.256144	1.01834
HORMAD2-AS1	9.26617	1.71978	1.92952e-20	1.57347e-19	0.0316731	ARPs	0.0889384	0.0331139	0.105169	0.049179	0.0830666	0.0896577
MAL	22.614	1.71973	3.1576e-113	1.06866e-111	0.0882711	SVZCs	0.402532	0.150189	0.293465	0.0985317	0.220687	0.216344
UNC5C	21.95	1.7176	8.66616e-107	2.46417e-104	0.305313	WMAs	1.08268	0.225527	1.05817	0.177263	0.452321	1.36481
AL122014.1	7.96357	1.71592	1.67142e-15	6.25173e-14	0.0602696	WMAs	0.155835	0.0540615	0.205348	0.0971636	0.067089	0.0833898
LINC01896	24.8651	1.71453	1.7763e-136	9.73456e-135	0.116731	ARPs	0.447817	0.134613	0.387235	0.170993	0.214936	0.334498
TAFA1	20.0704	1.71397	1.33787e-89	4.5059e-88	0.10728	ARPs	0.332488	0.171048	0.477472	0.0898477	0.197831	0.304814
DIAPH3	24.4842	1.7137	2.17579e-132	1.12991e-130	0.115709	ARPs	0.567645	0.150055	0.425939	0.351066	0.29001	0.124433
EPHA6	51.5065	1.71244	0	0	0.626826	SVZCs	2.28217	1.11088	2.28797	1.30888	0.992409	1.89469
CLDN10	30.5953	1.71142	1.414e-205	8.20263e-204	0.153206	SVZCs	0.606951	0.212135	0.474596	0.170134	0.262945	0.324964
SLC25A48	36.0574	1.70975	1.05576e-284	1.41407e-282	0.212261	ARPs	0.774696	0.298388	0.759538	0.335617	0.415053	0.541039
CNTN1	42.7887	1.7082	0	0	0.561023	AR2	2.16831	2.40584	1.99686	2.43073	3.03329	1.08121
AC105383.1	33.9737	1.70566	5.45409e-253	6.04481e-251	0.208685	ARPs	0.633501	0.271599	0.702044	0.358958	0.627187	0.524692
TNFSF13	15.4376	1.70515	9.14457e-54	1.74491e-52	0.0579821	ARPs	0.219628	0.0644608	0.196475	0.0671871	0.131662	0.192783
LINC00683	7.38357	1.70152	1.54096e-13	9.76717e-13	0.0263091	ARPs	0.0715511	0.0291783	0.0919396	0.0432275	0.0697903	0.0509233
SPATA1	18.7393	1.70046	2.36722e-78	6.89495e-77	0.0814815	ARPs	0.238155	0.0960334	0.283365	0.134773	0.155682	0.301655
C8orf37-AS1	21.7341	1.69999	9.75972e-105	5.63335e-103	0.172534	AR1	0.203151	0.427968	0.549195	0.586764	0.514964	0.506928
KCNMB2-AS1	37.0208	1.69977	5.30508e-300	4.47769e-298	0.269075	SVZCs	0.719386	0.64886	1.02763	0.439793	0.884154	0.717405
PLAGL1	27.9881	1.69658	2.26978e-172	1.11686e-170	0.135349	SVZCs	0.322998	0.217797	0.447524	0.160533	0.128789	0.553145
IFI44L	9.96357	1.69614	2.20021e-23	2.9908e-22	0.0651731	AR1	0.0638618	0.161711	0.19366	0.178116	0.212664	0.164333
ATP1B2	52.0295	1.69589	0	0	0.51461	SVZCs	1.31124	0.874896	1.47428	0.712728	1.02753	1.53726
ADARB2	19.3185	1.69584	3.75072e-83	1.85345e-81	0.101096	AR2	0.636527	0.227784	0.32065	0.397158	0.447036	0.110365
CGRRF1	20.461	1.69562	4.79083e-93	1.69068e-91	0.0871009	ARPs	0.311476	0.0962564	0.283138	0.150438	0.157509	0.247207
WASF3-AS1	7.1355	1.69521	9.64358e-13	5.92413e-12	0.0286079	ARPs	0.157606	0.0330808	0.103382	0.0703801	0.0533104	0.124795
ALCAM	44.6949	1.69493	0	0	0.467688	ARPs	1.48672	0.778892	1.57222	0.649509	1.13709	1.09492
HS3ST5	14.0545	1.69213	7.2328e-45	7.33643e-43	0.159397	WMAs	0.610928	0.193805	0.522267	0.113952	0.192477	0.325529
PHACTR1	30.7557	1.69184	1.02607e-207	9.88728e-205	0.651864	WMAs	1.97459	1.42241	2.02836	1.61264	1.11298	2.03194
DTX4	14.3892	1.69053	6.0479e-47	9.93379e-46	0.0526181	ARPs	0.181979	0.0590015	0.179127	0.0912848	0.108405	0.244785
PCTP	22.8224	1.68673	2.7452e-115	9.39286e-114	0.0982143	SVZCs	0.240446	0.12171	0.323273	0.112033	0.324651	0.233123
AC097518.2	40.5096	1.68557	0	0	0.444823	AR2	1.18161	0.170597	1.53105	0.442181	0.910018	0.754396
VAX1	10.8818	1.68497	1.40781e-27	1.42924e-26	0.040613	ARPs	0.197435	0.0450433	0.138144	0.0952909	0.0418581	0.429634
APCDD1	40.6445	1.68478	0	0	0.257305	SVZCs	0.769559	0.479528	0.78957	0.317742	0.600483	0.525905
NFATC2	20.6151	1.68394	2.00708e-94	7.21508e-93	0.0873563	ARPs	0.612368	0.111853	0.322271	0.20827	0.405092	0.207085
HS3ST5	24.5739	1.68122	2.39992e-133	1.27104e-131	0.1341	ARPs	0.610928	0.193805	0.522267	0.113952	0.192477	0.325529
AC104459.1	6.87042	1.67845	6.40134e-12	3.80831e-11	0.0217114	ARPs	0.0518378	0.0256486	0.0798818	0.0225592	0.0490228	0.0873068
AC095060.1	14.8249	1.67829	1.01162e-49	1.88571e-48	0.0578328	SVZCs	0.093548	0.0807438	0.215993	0.0726276	0.0601315	0.153743
LRMDA	41.1685	1.67582	0	0	0.546871	ARPs	2.15212	1.22676	2.16338	2.14016	2.51205	2.04137
TFCP2L1	12.0929	1.67298	1.15195e-33	1.39287e-32	0.0411239	ARPs	0.170969	0.0541189	0.163246	0.0383307	0.245822	0.0966124
AC093110.1	7.68804	1.67036	1.49405e-14	9.84588e-14	0.0326948	ARPs	0.143063	0.0348046	0.106818	0.0658246	0.0474705	0.17595
GRAMD1C	44.847	1.66924	0	0	0.42963	ARPs	1.58075	0.657535	1.37572	0.699691	1.30321	1.04892
AP001825.1	18.8041	1.66727	6.9934e-79	2.05073e-77	0.0914432	ARPs	0.299168	0.111676	0.318645	0.183707	0.116624	0.494796
RHOJ	25.9383	1.66685	2.46189e-148	1.3556e-145	0.401269	WMAs	1.30153	0.476756	1.22581	0.390457	0.564197	1.0074
FAS	15.585	1.66647	9.21133e-55	1.13312e-52	0.163362	WMAs	0.430647	0.359462	0.44394	0.265213	0.162159	0.521521
A2ML1-AS1	18.3968	1.666	1.39392e-75	3.90591e-74	0.0927203	ARPs	0.39242	0.104125	0.298799	0.230148	0.176417	0.377678
LMO3	56.6623	1.66533	0	0	0.668628	SVZCs	2.1267	0.924944	2.03712	1.13217	1.53538	1.22266
RANBP17	7.18244	1.66516	6.84778e-13	2.13432e-11	0.0563045	WMAs	0.1685	0.0235174	0.228987	0.0155281	0.0780137	0.286102
CPEB3	51.5564	1.66503	0	0	0.494927	SVZCs	1.8513	0.813224	1.50936	0.74726	1.21978	0.903928
SPRED1	43.8881	1.66387	0	0	0.431673	ARPs	1.53465	0.645338	1.35398	0.564051	0.91522	1.54519
ASRGL1	32.8008	1.663	5.7294e-236	5.84567e-234	0.189783	ARPs	0.637534	0.246203	0.63341	0.211199	0.458236	0.905269
HES4	7.56259	1.66223	3.95115e-14	1.33984e-12	0.0539255	WMAs	0.141952	0.108145	0.194264	0.0674861	0.0655489	0.221908
AC074286.1	7.76957	1.66209	7.87524e-15	7.83458e-14	0.0488798	AR1	0.0465658	0.0324105	0.140504	0.0442381	0.0817396	0.118693
ETV5	10.8546	1.66013	1.89736e-27	1.92061e-26	0.0467433	ARPs	0.175309	0.0543626	0.1626	0.0287885	0.075803	0.157412
MIAT	39.0805	1.65866	0	0	0.217127	SVZCs	0.752699	0.214593	0.705824	0.281272	0.438902	0.662278
AC138627.1	27.2291	1.65785	2.93834e-163	2.8713e-161	0.270294	AR1	0.319235	0.61241	0.782386	0.625713	0.693944	0.549644
AC010974.2	9.52507	1.65663	1.64923e-21	1.391e-20	0.0398467	ARPs	0.149157	0.0448994	0.135217	0.140499	0.0658187	0.127962
AL157834.1	7.76647	1.65573	8.07036e-15	6.30827e-14	0.0247565	SVZCs	0.0732469	0.0262299	0.0786535	0.0256393	0.048065	0.05227
TUBB2B	39.2464	1.65222	0	0	0.26664	SVZCs	1.26728	0.481913	0.819689	0.339314	0.545663	1.18565
FLRT2	53.4386	1.65029	0	0	0.729842	AR2	2.90632	1.10373	2.22105	1.33092	2.03154	1.28585
NEDD9	12.1312	1.64945	7.21853e-34	5.57708e-32	0.0991277	WMAs	0.258817	0.0881299	0.320574	0.0897653	0.113744	0.532954
NCR3LG1	8.28318	1.64885	1.19933e-16	8.60315e-16	0.0324393	ARPs	0.132627	0.0325956	0.0988477	0.0276341	0.0830747	0.0856551
PCDH7	45.0657	1.64787	0	0	0.567561	ARPs	1.93669	1.10758	1.99499	0.984931	1.81223	1.42572
STXBP5	54.2784	1.64694	0	0	0.676884	ARPs	2.47725	1.20157	2.11411	1.33663	1.96305	1.80108
SCG3	30.1892	1.64671	3.28632e-200	1.8537e-198	0.171063	SVZCs	0.649347	0.237642	0.530813	0.201844	0.241142	0.413568
ATP2C1	43.3394	1.64657	0	0	0.396679	ARPs	2.0837	0.563944	1.21548	0.772876	0.726251	1.07691
FIRRE	17.7221	1.64619	2.8297e-70	6.76982e-69	0.0756899	SVZCs	0.276612	0.228632	0.28786	0.101265	0.281464	0.176202
NKAIN3	56.2699	1.64563	0	0	0.838314	ARPs	2.97344	2.11192	3.16666	2.191	2.61665	2.5442
EPHB2	15.223	1.64509	2.49021e-52	4.8287e-51	0.0519481	SVZCs	0.22883	0.107144	0.177003	0.0600697	0.0535065	0.233823
CARMIL1	56.408	1.645	0	0	0.742018	ARPs	2.62226	1.4854	2.45837	1.70823	2.15185	2.18005
TNFSF13	16.4541	1.6434	7.8383e-61	1.7005e-59	0.0643263	SVZCs	0.219628	0.0644608	0.196475	0.0671871	0.131662	0.192783
PPARGC1A	35.1854	1.64318	3.34198e-271	8.28095e-269	0.270158	AR2	0.830721	0.579787	0.775252	0.622553	0.926542	0.31841
VEGFC	14.8651	1.64299	5.55523e-50	9.80218e-49	0.0618135	ARPs	0.144247	0.0790038	0.228527	0.138415	0.156426	0.186025
MAST4	54.1759	1.64119	0	0	0.736398	ARPs	2.50852	1.49904	2.47205	1.3715	1.77764	2.5142
DPP10-AS1	8.30166	1.64003	1.02665e-16	4.12205e-15	0.0832672	WMAs	0.176063	0.214399	0.270491	0.274355	0.0949995	0.569707
LINC02774	9.66353	1.63936	4.3077e-22	5.63477e-21	0.0532441	AR1	0.0522798	0.0331643	0.154606	0.0383968	0.0840463	0.0800404
AL133257.1	28.2163	1.63925	3.69004e-175	2.71202e-173	0.165773	ARPs	0.42963	0.213098	0.553795	0.31787	0.392311	0.341045
DISP1	33.2003	1.63768	1.06692e-241	1.1284e-239	0.233206	ARPs	1.00637	0.317523	0.771446	0.473846	0.613402	0.50654
ELOVL2	35.3849	1.63693	2.91621e-274	3.6921e-272	0.232695	ARPs	0.685832	0.308665	0.753586	0.231967	0.440115	0.685862
SERPINB9	20.7305	1.63691	1.83804e-95	6.71884e-94	0.0965517	ARPs	0.495964	0.111979	0.313717	0.105077	0.26878	0.253183
NR2E1	20.8868	1.63612	7.0529e-97	2.61674e-95	0.0945083	ARPs	0.395008	0.105162	0.296155	0.113061	0.123422	0.302935
AL137009.1	26.6203	1.63462	3.94751e-156	2.54061e-154	0.157088	ARPs	0.640333	0.200531	0.524422	0.307081	0.265313	0.732694
GLUD1	61.1649	1.63345	0	0	0.697443	SVZCs	1.96123	1.0765	2.02066	1.1343	1.50144	1.85554
MT3	47.1534	1.63334	0	0	0.57082	SVZCs	2.87243	1.2776	1.75908	0.935902	1.36435	1.70464
ZNF703	11.9343	1.63227	7.84087e-33	9.25799e-32	0.0457216	ARPs	0.17506	0.0499862	0.147467	0.0442122	0.0673601	0.0991441
ERBB4	80	1.63162	0	0	0.958401	SVZCs	4.03476	2.87891	3.92794	2.83747	3.78491	3.65079
SLC35F1	44.0404	1.6309	0	0	0.528225	ARPs	1.84573	0.97421	1.80948	0.506596	1.05135	1.85328
DPP10-AS3	12.5055	1.63004	6.97001e-36	5.75689e-34	0.141158	WMAs	0.378122	0.464201	0.473095	0.548671	0.178522	0.867844
ADGRB3	67.2049	1.62885	0	0	0.923372	ARPs	3.86217	2.5519	3.62676	2.77298	3.46796	3.06469
WDR17	42.8236	1.62834	0	0	0.401022	ARPs	1.45464	0.575379	1.22514	0.777792	0.829592	0.867933
AC124854.1	24.8307	1.62822	4.17914e-136	3.76557e-134	0.167844	AR2	0.475106	0.289088	0.579822	0.300081	0.711838	0.226475
RANBP3L	48.1355	1.62785	0	0	0.635504	ARPs	2.60467	1.23395	2.14298	1.56781	1.7015	1.3727
AL513217.1	11.2574	1.62553	2.12868e-29	2.68622e-28	0.0446429	SVZCs	0.0663344	0.0806079	0.134788	0.0457042	0.126513	0.124925
LINC02328	30.8129	1.6243	1.75839e-208	1.59265e-206	0.194891	ARPs	0.457799	0.28639	0.704253	0.30567	0.359162	0.485503
CEMIP2	7.79501	1.6241	6.44014e-15	2.32717e-13	0.0666138	WMAs	0.18333	0.0506206	0.198638	0.0599628	0.0688604	0.312948
AL163541.1	8.49098	1.62334	2.04894e-17	8.5636e-16	0.0777161	WMAs	0.132908	0.119041	0.299841	0.0693004	0.107498	0.176412
LINC00645	12.1472	1.62245	5.93298e-34	1.35227e-32	0.0725944	AR2	0.378589	0.0197264	0.252754	0.0296441	0.279348	0.0892893
AL157834.1	7.16416	1.62244	7.8267e-13	4.82252e-12	0.0234994	ARPs	0.0732469	0.0262299	0.0786535	0.0256393	0.048065	0.05227
TRPM3	45.8527	1.62213	0	0	0.73447	AR2	2.43162	2.49824	2.75508	2.37648	4.01355	1.75485
RNF217-AS1	11.8568	1.62156	1.98461e-32	3.47531e-31	0.0829212	AR1	0.0883334	0.153414	0.250116	0.117515	0.18912	0.255837
AC079760.1	18.7061	1.6211	4.4169e-78	1.27792e-76	0.0952746	ARPs	0.171509	0.134317	0.366173	0.105664	0.142696	0.273164
GFRA1	34.294	1.62031	9.63915e-258	7.03962e-256	0.222606	SVZCs	0.775475	0.243361	0.76752	0.318811	0.274666	1.13964
ARHGAP29	10.6759	1.62028	1.32032e-26	8.14981e-25	0.0904044	WMAs	0.31597	0.0891611	0.301969	0.0359181	0.108553	0.385887
SMIM20	15.7087	1.61936	1.31934e-55	2.68591e-54	0.0647321	SVZCs	0.499812	0.0669629	0.192603	0.0668475	0.0883226	0.241363
AC006355.2	11.2602	1.6193	2.06203e-29	2.20571e-28	0.0541507	ARPs	0.220158	0.0546293	0.159142	0.121766	0.111077	0.175616
HES4	14.0011	1.6188	1.53493e-44	2.64253e-43	0.0523539	SVZCs	0.141952	0.108145	0.194264	0.0674861	0.0655489	0.221908
OSTM1-AS1	7.63223	1.61838	2.30733e-14	1.76497e-13	0.0322646	SVZCs	0.0884171	0.0218557	0.0970395	0.0326513	0.0214005	0.113682
AC008067.1	8.51375	1.61831	1.68398e-17	1.24266e-16	0.0390805	ARPs	0.179308	0.0470247	0.137866	0.169197	0.056929	0.14948
GLUL	43.6572	1.61771	0	0	0.547126	ARPs	1.94619	1.02026	1.86314	0.632107	1.43978	2.10922
SMIM20	14.7098	1.61679	5.57902e-49	9.62867e-48	0.0590038	ARPs	0.499812	0.0669629	0.192603	0.0668475	0.0883226	0.241363
AC115622.1	25.9236	1.61643	3.60603e-148	2.18313e-146	0.16424	ARPs	0.355738	0.235408	0.595443	0.193253	0.58314	0.416175
LINC02406	28.7875	1.61618	3.07229e-182	1.59071e-180	0.150162	SVZCs	0.170382	0.123261	0.487085	0.186239	0.312823	0.348769
TSHR	16.3532	1.6157	4.1277e-60	8.87724e-59	0.0914432	ARPs	0.497158	0.109503	0.303541	0.245791	0.195407	0.260237
AL445426.1	35.5344	1.61401	1.44721e-276	1.11812e-274	0.264813	SVZCs	1.22386	0.564093	0.922782	0.402363	0.965469	0.642083
AC137494.1	13.0578	1.61096	5.73701e-39	7.88497e-38	0.0615581	ARPs	0.151144	0.0708622	0.202374	0.0890628	0.111775	0.304729
AC004540.1	10.9072	1.61015	1.06508e-27	2.01678e-26	0.0570037	AR2	0.116489	0.143469	0.174104	0.120147	0.372561	0.0604328
RGS3	21.0744	1.60876	1.3665e-98	5.21493e-97	0.0888889	ARPs	0.462101	0.10904	0.301119	0.206461	0.262742	0.312041
AC092802.1	24.625	1.60781	6.81539e-134	3.63732e-132	0.129502	ARPs	0.429275	0.158711	0.421494	0.223862	0.292483	0.349904
POU6F2	18.1679	1.60574	9.26984e-74	4.14395e-72	0.121072	AR2	0.34869	0.200083	0.418066	0.203604	0.512694	0.157459
ARSF	8.54214	1.60556	1.31763e-17	1.81672e-16	0.0426309	AR2	0.112752	0.0585365	0.119355	0.0478532	0.113114	0.0408132
PHLPP1	53.1135	1.6012	0	0	0.698595	ARPs	2.26936	1.32463	2.23816	1.53338	2.00342	1.56753
AP001825.1	10.6744	1.6011	1.34077e-26	8.26133e-25	0.103886	WMAs	0.299168	0.111676	0.318645	0.183707	0.116624	0.494796
ARHGAP8	9.26143	1.59841	2.01719e-20	1.96452e-19	0.0355114	SVZCs	0.0477157	0.0753452	0.112456	0.0385534	0.0584256	0.202517
ADORA2B	11.8311	1.59828	2.6947e-32	1.95155e-30	0.0943695	WMAs	0.304428	0.124611	0.297862	0.0472731	0.108492	0.374942
SLC1A3	63.6403	1.59718	0	0	0.920051	ARPs	3.48194	2.47547	3.52458	2.29684	2.73979	4.21872
AC092691.3	21.1926	1.59694	1.11804e-99	4.3335e-98	0.122095	ARPs	0.422348	0.14967	0.397695	0.184102	0.226104	0.642894
FAM184A	47.6908	1.59679	0	0	0.559898	ARPs	1.93375	0.903278	1.69365	1.01909	0.994232	1.66973
CD302	16.5726	1.59619	1.0996e-61	2.44363e-60	0.0733078	ARPs	0.268176	0.0829991	0.232421	0.119888	0.168649	0.211877
TSPAN7	25.7215	1.59475	6.71733e-146	3.37716e-143	0.479778	WMAs	1.20535	0.468368	1.34297	0.412873	0.661185	1.16106
CDH10	37.8427	1.59075	0	0	0.359074	AR2	1.38702	0.39185	1.05667	0.540247	0.97873	0.48433
HDDC2	29.8832	1.59024	3.25794e-196	2.77685e-194	0.198467	ARPs	1.11678	0.240082	0.59721	0.372596	0.312555	0.651847
SYCP3	14.7117	1.58727	5.42066e-49	9.36467e-48	0.0784163	ARPs	0.335544	0.0818371	0.228128	0.131472	0.151941	0.317371
PYGM	11.7634	1.58602	6.02884e-32	1.29982e-30	0.0533496	AR2	0.153034	0.106749	0.153958	0.121133	0.127056	0.0539576
LINC00271	27.2333	1.5842	2.61819e-163	2.56567e-161	0.246145	AR1	0.291114	0.555825	0.699732	0.740695	0.650884	0.564694
CTSO	11.7334	1.58292	8.5901e-32	1.47301e-30	0.0689555	AR1	0.0624127	0.109168	0.176414	0.102809	0.158182	0.142239
CEND1	9.43873	1.58081	3.77323e-21	3.76347e-20	0.0363231	SVZCs	0.0941238	0.0919803	0.110279	0.0382348	0.0754269	0.111733
AC021055.1	10.9283	1.57821	8.4447e-28	1.0225e-26	0.0359172	SVZCs	0.134452	0.0306859	0.121993	0.0425339	0.0742619	0.0746934
AC007432.1	10.5356	1.57663	5.92008e-26	1.07018e-24	0.0562728	AR2	0.121529	0.117298	0.166704	0.144297	0.127051	0.0590406
ABCG1	12.3378	1.57559	5.6677e-35	8.07113e-34	0.0517451	SVZCs	0.186675	0.0674788	0.161404	0.0571052	0.110464	0.210646
HLF	16.4916	1.57377	4.21897e-61	1.59256e-59	0.0976857	AR2	0.302772	0.172382	0.270423	0.217196	0.266043	0.0992229
MEF2C-AS2	16.4272	1.57257	1.22131e-60	2.64135e-59	0.0886769	SVZCs	0.184936	0.0744758	0.281527	0.103746	0.170854	0.188921
PHKA1	42.7021	1.57143	0	0	0.358563	SVZCs	0.850484	0.479531	1.01364	0.464188	0.884618	0.891348
ROBO1	25.1576	1.56936	1.16762e-139	5.40062e-137	0.462331	WMAs	1.46347	0.536421	1.36573	0.573672	0.684837	1.40106
AC083837.1	9.04376	1.5684	1.51372e-19	1.81573e-18	0.0584812	AR1	0.0685035	0.441419	0.190856	0.414408	0.207525	0.760455
ERBB4	68.2234	1.56819	0	0	0.953001	ARPs	4.03476	2.87891	3.92794	2.83747	3.78491	3.65079
AL109809.5	51.3164	1.56788	0	0	0.631899	SVZCs	2.04485	0.939639	1.86086	1.04074	1.40263	1.38538
AL133538.1	8.06631	1.56747	7.24568e-16	5.05231e-15	0.0301405	ARPs	0.0497478	0.0359173	0.102907	0.0435394	0.0607029	0.0964302
REEP1	7.11475	1.56634	1.12114e-12	3.43874e-11	0.0515464	WMAs	0.167248	0.137074	0.17936	0.275178	0.0642272	0.141526
USP3	38.329	1.56581	0	0	0.348404	ARPs	1.03874	0.479668	1.03754	0.511961	0.996776	0.967359
HKDC1	12.6268	1.56569	1.50219e-36	1.95246e-35	0.0544061	ARPs	0.104213	0.0610772	0.170953	0.0737708	0.0954922	0.207115
OLFM1	12.8904	1.56562	5.09957e-38	7.74536e-37	0.0507305	SVZCs	0.198618	0.0827235	0.153047	0.0543658	0.115417	0.190688
RGS20	27.3983	1.56553	2.86971e-165	2.03164e-162	0.647898	WMAs	2.0437	1.39063	2.01163	1.01082	1.15932	2.3494
MT-ND3	36.4087	1.56402	3.09517e-290	8.32336e-288	0.488916	AR2	1.89313	1.62488	1.4849	0.815829	1.2759	0.767701
PCDH10	34.5199	1.56357	4.03892e-261	4.78191e-259	0.255683	ARPs	0.808931	0.329846	0.767794	0.403146	0.563486	0.536347
FLRT2	53.689	1.56118	0	0	0.707386	SVZCs	2.90632	1.10373	2.22105	1.33092	2.03154	1.28585
LINC00886	22.9164	1.56094	3.19081e-116	1.45071e-114	0.129757	ARPs	0.339125	0.166731	0.42874	0.213475	0.217969	0.332823
AC023095.1	38.4893	1.56087	0	0	0.374202	ARPs	1.30362	0.564229	1.17452	0.60677	0.85114	0.610202
AC097537.1	8.16081	1.56039	3.32775e-16	1.29707e-14	0.0880254	WMAs	0.21741	0.0503117	0.229249	0.102525	0.0837532	0.299314
PCTP	20.1357	1.56009	3.59544e-90	1.2216e-88	0.101405	ARPs	0.240446	0.12171	0.323273	0.112033	0.324651	0.233123
EMX2	16.3855	1.55908	2.42826e-60	3.41038e-58	0.173672	WMAs	0.76511	0.293331	0.489286	0.28335	0.194078	0.499674
ARHGAP24	22.1778	1.55777	5.63152e-109	1.64166e-106	0.461538	WMAs	1.43493	0.34167	1.64406	0.109308	0.883161	1.56733
PRELP	11.0757	1.5569	1.64651e-28	1.71524e-27	0.0452107	ARPs	0.231663	0.0510395	0.143292	0.10244	0.0755131	0.0732321
KLHL32	38.4249	1.5566	0	0	0.342529	ARPs	1.03178	0.519523	1.09991	0.90848	1.11032	0.640445
AC246817.1	7.86741	1.55564	3.62051e-15	2.4564e-14	0.0319285	ARPs	0.090029	0.0412283	0.116653	0.0359417	0.0586684	0.094035
CBR3	8.30775	1.5543	9.75296e-17	8.28835e-16	0.0342938	SVZCs	0.0960797	0.0435612	0.103768	0.0365545	0.0716088	0.136922
AC016716.2	12.2309	1.55425	2.1263e-34	2.61287e-33	0.062069	ARPs	0.217756	0.0681945	0.188355	0.198657	0.0906456	0.186459
ABCD2	32.9759	1.553	1.80084e-238	3.47062e-236	0.271864	AR2	0.719497	0.145931	0.712188	0.158573	0.516106	0.302992
AC010201.3	24.0704	1.55241	5.11072e-128	1.9233e-126	0.124797	SVZCs	0.294943	0.229529	0.363045	0.139092	0.282906	0.322768
SCRG1	26.3141	1.55107	1.32206e-152	8.2784e-151	0.161941	ARPs	1.11532	0.196617	0.492681	0.217903	0.262567	0.4838
CA8	40.2343	1.55068	0	0	0.475862	ARPs	1.77141	0.815487	1.54587	0.874944	0.694253	1.55359
AC002429.2	47.1673	1.55031	0	0	0.699878	SVZCs	2.17881	1.10855	2.38392	1.47299	1.3606	1.61603
OTUD7A	46.5625	1.54864	0	0	0.479505	SVZCs	1.309	0.860799	1.38411	0.70434	1.56694	1.27054
BRINP2	32.8963	1.54833	2.48508e-237	1.64205e-235	0.21043	SVZCs	0.505238	0.303334	0.666406	0.280553	0.582534	0.390549
RBP1	7.39042	1.54712	1.46366e-13	1.07687e-12	0.0296266	SVZCs	0.114989	0.0235873	0.0878052	0.0309219	0.0429633	0.0727152
SPDYE2	10.2442	1.54621	1.25682e-24	1.17422e-23	0.051341	ARPs	0.150678	0.0568194	0.157641	0.0933289	0.0810774	0.189204
AL390774.2	7.78514	1.54613	6.9637e-15	4.66353e-14	0.0385696	ARPs	0.169762	0.0437141	0.122651	0.0884843	0.0585211	0.187984
GRAMD1C	47.4046	1.54577	0	0	0.481128	SVZCs	1.58075	0.657535	1.37572	0.699691	1.30321	1.04892
ACBD7	19.8352	1.54574	1.48046e-87	4.87721e-86	0.0914432	ARPs	0.328264	0.10677	0.284402	0.110998	0.214709	0.175692
TMEM51	14.4923	1.54387	1.35547e-47	2.4503e-46	0.0556006	SVZCs	0.23066	0.165626	0.184865	0.0673232	0.0729546	0.146661
FAXDC2	28.0028	1.54144	1.50263e-172	1.90938e-170	0.195615	AR2	0.488742	0.389624	0.514417	0.468971	0.558579	0.207898
CHAC2	7.38154	1.54134	1.5647e-13	9.91589e-13	0.0367816	ARPs	0.19858	0.0374829	0.105413	0.0690475	0.0585772	0.0978503
CST3	45.4882	1.53956	0	0	0.589894	SVZCs	2.48239	1.33792	1.78132	0.9927	1.22631	1.56502
GALNT16	13.1464	1.539	1.7838e-39	1.60727e-37	0.155432	WMAs	0.237858	0.406648	0.435661	0.0960124	0.172176	1.17722
SOX21	8.51112	1.53646	1.72264e-17	1.27065e-16	0.0367816	ARPs	0.158166	0.0379648	0.106381	0.0592277	0.049658	0.0529086
KCNMB2	17.2612	1.53592	9.22489e-67	2.11788e-65	0.0996347	SVZCs	0.230931	0.125424	0.31089	0.118449	0.154058	0.327199
ADGRL3	62.2856	1.53188	0	0	0.904725	ARPs	3.45287	2.37697	3.37614	2.25252	3.16973	3.20322
COPS9	13.0925	1.53106	3.6366e-39	3.22644e-37	0.177637	WMAs	1.51683	0.207461	0.46032	0.186992	0.184218	0.426004
COL18A1	7.4748	1.5302	7.73209e-14	5.77203e-13	0.0267857	SVZCs	0.075143	0.0426169	0.0808964	0.0287554	0.0342041	0.0783125
TXNIP	23.0023	1.52877	4.42428e-117	3.28647e-115	0.172229	AR2	0.562137	0.398268	0.502341	0.410719	0.678026	0.203895
AC079760.1	10.0681	1.52761	7.64548e-24	4.2032e-22	0.121332	WMAs	0.171509	0.134317	0.366173	0.105664	0.142696	0.273164
AP001528.1	16.2674	1.52725	1.68128e-59	5.12961e-58	0.127437	AR1	0.124217	0.17666	0.322972	0.100124	0.218935	0.474809
AF165147.1	11.3633	1.52668	6.36753e-30	1.0439e-28	0.0858307	AR1	0.0968369	0.361149	0.256937	0.360539	0.298973	0.190026
NR2E1	21.8241	1.52582	1.37073e-105	4.40691e-104	0.106331	SVZCs	0.395008	0.105162	0.296155	0.113061	0.123422	0.302935
AL078459.1	27.329	1.5253	1.91917e-164	1.30032e-162	0.19719	ARPs	0.583057	0.24431	0.585888	0.448636	0.339349	0.837841
GLIPR1L1	13.2209	1.52504	6.64606e-40	9.31523e-39	0.0681992	ARPs	0.208178	0.0799282	0.214685	0.158099	0.125777	0.241623
AC007402.1	9.65774	1.52393	4.55788e-22	2.33205e-20	0.135607	WMAs	0.210015	0.0689112	0.501857	0.0417998	0.204287	0.294032
TP53BP2	39.181	1.5237	0	0	0.357344	ARPs	1.41762	0.485073	1.02784	0.647718	0.787829	1.06934
PPP1R9A	47.9902	1.52333	0	0	0.697829	ARPs	2.35585	1.31565	2.17921	1.73362	1.7053	1.9789
PLCB1	48.8039	1.52141	0	0	0.789017	ARPs	3.03766	1.88254	2.83265	1.53383	2.92141	2.55578
RIPOR2	35.6423	1.52064	3.10052e-278	7.85087e-276	0.317174	AR2	0.986415	0.440752	0.894982	0.44551	0.857444	0.408412
AC095060.1	13.1074	1.51953	2.98769e-39	4.13414e-38	0.0600255	ARPs	0.093548	0.0807438	0.215993	0.0726276	0.0601315	0.153743
AC104232.3	8.26421	1.51908	1.40625e-16	1.00604e-15	0.0357599	ARPs	0.0780717	0.0442939	0.122043	0.0776995	0.116654	0.0907686
AC013643.2	15.5694	1.51891	1.17543e-54	3.27516e-53	0.107943	AR1	0.100288	0.20626	0.264135	0.158336	0.181454	0.354189
MBNL3	13.455	1.51757	2.8768e-41	4.16338e-40	0.0722861	ARPs	0.268761	0.0854484	0.227456	0.0953022	0.086936	0.148239
DNMBP-AS1	8.97884	1.5175	2.73646e-19	2.5532e-18	0.0379464	SVZCs	0.12281	0.0330173	0.110873	0.040139	0.218987	0.0636167
FAM171B	50.3116	1.51718	0	0	0.608969	SVZCs	1.93275	0.763342	1.71742	0.954227	0.992551	1.10461
DCHS2	16.3159	1.51681	7.60439e-60	1.04267e-57	0.261697	WMAs	1.01152	0.373975	0.788655	0.586121	0.350305	0.542428
ACSL6	41.2009	1.51657	0	0	0.430907	ARPs	0.951657	0.64644	1.28093	0.573974	0.911533	1.05504
NKAIN3	63.2873	1.51652	0	0	0.884537	SVZCs	2.97344	2.11192	3.16666	2.191	2.61665	2.5442
LINC02328	32.2429	1.51572	4.42828e-228	2.78292e-226	0.216924	SVZCs	0.457799	0.28639	0.704253	0.30567	0.359162	0.485503
AC092839.1	12.0918	1.51521	1.16762e-33	1.41132e-32	0.0643678	ARPs	0.22864	0.0692083	0.18634	0.127701	0.107625	0.227437
EPB41L2	43.7182	1.515	0	0	0.523372	ARPs	1.58932	0.83681	1.55627	0.977415	1.31157	1.57418
RORB-AS1	12.2601	1.51374	1.48274e-34	2.0909e-33	0.0553977	SVZCs	0.191261	0.0482364	0.15152	0.0557123	0.0810276	0.0819431
PHKA1	37.3808	1.51258	8.0207e-306	1.16907e-303	0.346616	ARPs	0.850484	0.479531	1.01364	0.464188	0.884618	0.891348
DCUN1D1	36.0235	1.51251	3.58362e-284	4.78138e-282	0.308557	ARPs	1.15668	0.3914	0.861519	0.486313	0.700602	0.613006
ADAMTSL4-AS1	21.6405	1.51231	7.46226e-104	2.37274e-102	0.111201	SVZCs	0.197901	0.189645	0.31521	0.122125	0.29222	0.42187
SLC25A48	35.7812	1.51185	2.16869e-280	1.70208e-278	0.272524	SVZCs	0.774696	0.298388	0.759538	0.335617	0.415053	0.541039
MEST	11.3039	1.51064	1.25579e-29	1.35038e-28	0.0434227	ARPs	0.312666	0.0517536	0.140933	0.0846435	0.0429066	0.119507
AC097462.3	9.5882	1.50989	8.96343e-22	7.64924e-21	0.0436782	ARPs	0.108867	0.0517978	0.14098	0.0815977	0.0634149	0.0771215
OMG	22.4998	1.50825	4.16592e-112	1.4017e-110	0.126218	SVZCs	0.465628	0.104503	0.351421	0.138045	0.157409	0.251692
COPS9	25.1335	1.50744	2.1429e-139	8.72502e-138	0.155641	SVZCs	1.51683	0.207461	0.46032	0.186992	0.184218	0.426004
ACSS1	46.5678	1.50709	0	0	0.475446	SVZCs	1.16111	0.795406	1.33669	0.686806	1.11154	0.994105
ZNF208	9.81122	1.50598	1.0074e-22	8.84503e-22	0.0546616	ARPs	0.286428	0.0724114	0.193336	0.0738161	0.151198	0.206623
AC083843.3	11.7067	1.50576	1.17839e-31	1.55905e-30	0.0428166	SVZCs	0.148568	0.0548883	0.122126	0.0447269	0.122099	0.111628
NCKAP5	43.0572	1.50487	0	0	0.602299	ARPs	1.91632	1.15628	1.9715	2.10373	1.49583	1.18796
VIM	19.2873	1.49968	6.87232e-83	1.39416e-80	0.263283	WMAs	1.39925	0.795944	0.773972	0.954411	0.345836	0.960082
AC245187.2	6.98387	1.49943	2.87165e-12	2.56218e-11	0.0453884	AR1	0.046829	0.0209011	0.127117	0.0222264	0.0430217	0.0725369
IFIT3	10.7388	1.49736	6.69344e-27	6.66462e-26	0.047765	ARPs	0.141373	0.0546684	0.147246	0.0613925	0.0835952	0.194392
MAOA	28.1401	1.49702	3.16807e-174	1.57225e-172	0.170455	SVZCs	0.60706	0.235502	0.503303	0.208447	0.755667	0.422929
PRR5	16.3605	1.49644	3.66281e-60	5.1235e-58	0.180809	WMAs	0.5063	0.213321	0.49303	0.100444	0.203647	0.455589
GPC1	24.999	1.49474	6.26071e-138	2.53424e-136	0.124594	SVZCs	0.253334	0.25523	0.367803	0.146478	0.202566	0.302875
FRMD5	22.7466	1.49394	1.55007e-114	4.88837e-112	0.488501	WMAs	1.8867	1.51284	1.59395	1.22355	0.872499	1.39813
SLC35C2	27.0127	1.4931	1.04777e-160	4.89854e-159	0.176542	SVZCs	0.375761	0.21141	0.458549	0.187869	0.25516	0.524033
PDE7B	44.2308	1.49286	0	0	0.629374	ARPs	2.09492	1.21336	2.03543	1.3638	2.06383	1.67367
SLC30A10	23.3995	1.49284	4.32246e-121	1.55385e-119	0.127435	SVZCs	0.295653	0.117594	0.369061	0.147215	0.274356	0.216518
ZFHX4	49.7276	1.49198	0	0	0.600446	SVZCs	1.90233	1.08039	1.75634	0.994507	1.30063	1.43614
MBNL3	7.7484	1.49158	9.30561e-15	3.30073e-13	0.0785091	WMAs	0.268761	0.0854484	0.227456	0.0953022	0.086936	0.148239
CPEB3	41.4212	1.48927	0	0	0.493231	ARPs	1.8513	0.813224	1.50936	0.74726	1.21978	0.903928
CTXND1	25.0653	1.48826	1.19021e-138	6.68097e-137	0.128991	ARPs	0.910757	0.194087	0.470595	0.240001	0.620138	0.21053
FAM155A	38.5218	1.4879	0	0	0.585836	SVZCs	1.63764	1.85767	2.3009	1.43574	2.05779	2.05596
ETNPPL	45.5521	1.48733	0	0	0.701827	AR2	2.14628	0.925331	2.14818	1.03184	1.90503	1.30826
PRKCQ	14.9747	1.4872	1.0751e-50	2.79784e-49	0.120163	AR1	0.115132	0.256358	0.294222	0.157395	0.226542	0.65349
NDP	19.5918	1.48681	1.81792e-85	5.86094e-84	0.103959	ARPs	0.267978	0.127037	0.321831	0.0862477	0.19195	0.311343
ACBD7	21.1167	1.4866	5.58393e-99	1.72644e-97	0.0988231	SVZCs	0.328264	0.10677	0.284402	0.110998	0.214709	0.175692
TAFA1	10.6449	1.48419	1.84253e-26	1.13128e-24	0.133228	WMAs	0.332488	0.171048	0.477472	0.0898477	0.197831	0.304814
OPHN1	50.7612	1.48241	0	0	0.785441	ARPs	2.56605	1.66953	2.56817	1.6702	2.21583	2.55827
SPARCL1	61.631	1.48217	0	0	0.88819	SVZCs	3.30065	2.2931	3.07214	2.12459	2.57079	2.77438
OPHN1	61.0245	1.48123	0	0	0.83056	SVZCs	2.56605	1.66953	2.56817	1.6702	2.21583	2.55827
MTCP1	8.77456	1.48066	1.71574e-18	1.31534e-17	0.0436782	ARPs	0.140539	0.0507728	0.135713	0.0801497	0.0735884	0.213423
AC007402.1	14.4215	1.47976	3.78999e-47	9.20692e-46	0.148967	AR1	0.210015	0.0689112	0.501857	0.0417998	0.204287	0.294032
PPP2R2C	39.4298	1.47964	0	0	0.310471	SVZCs	1.01834	0.531106	0.882866	0.411049	0.588033	0.655057
SOX2-OT	41.621	1.47818	0	0	0.521073	ARPs	1.73766	0.836452	1.53568	1.06172	1.40333	1.32087
S100A13	23.5692	1.47752	7.97717e-123	2.90681e-121	0.141843	SVZCs	0.761442	0.193713	0.393106	0.15951	0.227887	0.358551
ZNF208	10.3876	1.47723	2.82251e-25	3.21448e-24	0.0592532	SVZCs	0.286428	0.0724114	0.193336	0.0738161	0.151198	0.206623
STOX1	38.7177	1.47709	0	0	0.392337	ARPs	1.32011	0.603	1.1951	0.522591	0.942	1.18788
CC2D2B	23.3456	1.47673	1.52717e-120	1.02076e-118	0.242363	AR1	0.255746	0.162633	0.593925	0.176827	0.379708	0.655981
LMO3	47.8647	1.47661	0	0	0.712058	AR2	2.1267	0.924944	2.03712	1.13217	1.53538	1.22266
AC023421.2	14.0261	1.47632	1.07955e-44	3.05212e-43	0.0850183	AR2	0.306641	0.126009	0.249589	0.264734	0.281619	0.0970268
ANKRD29	13.2986	1.47618	2.3576e-40	2.15224e-38	0.131642	WMAs	0.386524	0.228061	0.378052	0.199258	0.152842	0.33339
LINC01376	27.5659	1.47552	2.85717e-167	2.91516e-165	0.283387	AR1	0.33304	0.510319	0.741458	0.580471	0.576694	0.72532
ENOSF1	31.1035	1.47543	2.16003e-212	1.96671e-210	0.196169	ARPs	0.388103	0.270843	0.623249	0.296932	0.525435	0.750982
ARL17B	22.8247	1.47526	2.61008e-115	1.88632e-113	0.186358	AR2	0.39374	0.557268	0.507239	0.540942	0.682122	0.2132
ALDH1L1	46.0828	1.47477	0	0	0.537338	SVZCs	1.7647	1.08962	1.46101	0.784366	1.4296	1.95491
LINC01239	9.0259	1.47427	1.78226e-19	2.13268e-18	0.0610998	AR1	0.0695776	0.0700442	0.182488	0.0566814	0.134457	0.152571
AC022509.2	8.72397	1.47381	2.68609e-18	2.42216e-17	0.0359172	SVZCs	0.0686587	0.0416445	0.0961794	0.0357024	0.0586342	0.106338
DECR1	36.256	1.47291	7.98943e-288	1.08688e-285	0.332056	ARPs	1.18803	0.449794	0.946484	0.596456	0.800339	0.762755
LINC02060	29.0603	1.47156	1.13878e-185	8.97828e-184	0.195147	ARPs	0.341755	0.2515	0.583895	0.34648	0.422407	0.374986
AC008957.1	8.69097	1.47147	3.59364e-18	1.57403e-16	0.0983347	WMAs	0.217675	0.0680598	0.257565	0.076279	0.100696	0.724147
MEIKIN	33.4389	1.4713	3.7316e-245	2.55828e-243	0.274959	SVZCs	0.864662	0.405743	0.84558	0.391657	0.535456	0.621902
KCNQ3	16.1349	1.4706	1.44935e-58	1.94876e-56	0.230769	WMAs	0.652405	0.131043	0.810665	0.0770479	0.372132	1.26274
FGFRL1	9.2107	1.46984	3.24019e-20	1.56331e-18	0.0943695	WMAs	0.235159	0.224011	0.242631	0.188707	0.0945249	0.265062
ALPK1	15.5726	1.46982	1.11797e-54	1.37041e-52	0.187153	WMAs	0.613576	0.81815	0.556553	0.430181	0.238102	0.853929
LYSMD2	10.3449	1.46914	4.41566e-25	4.17382e-24	0.0500639	ARPs	0.173802	0.0523013	0.13859	0.0542446	0.063184	0.114003
MYO10	47.5046	1.46892	0	0	0.525974	SVZCs	1.47081	0.831835	1.4268	0.762435	0.858476	1.05639
AC002463.1	20.7714	1.46886	7.8516e-96	2.88224e-94	0.141252	ARPs	0.499426	0.169726	0.413453	0.288838	0.243209	0.621035
P2RY12	11.6174	1.46879	3.36048e-31	3.78613e-30	0.0643678	ARPs	0.259798	0.0730247	0.190363	0.162176	0.102492	0.331787
VILL	6.93064	1.46844	4.18926e-12	2.51168e-11	0.0270754	ARPs	0.145281	0.0321283	0.086499	0.044125	0.0310604	0.0627288
CHST1	23.9941	1.46827	3.20652e-127	1.58679e-125	0.135377	ARPs	0.268111	0.159239	0.390432	0.0881415	0.231541	0.379191
AL163541.1	14.0101	1.4677	1.352e-44	2.11742e-43	0.0771392	ARPs	0.132908	0.119041	0.299841	0.0693004	0.107498	0.176412
AL358334.4	6.97182	1.46653	3.12863e-12	1.88424e-11	0.0367816	ARPs	0.117559	0.0414367	0.110573	0.0558354	0.0494464	0.273846
LRP4	39.8437	1.46643	0	0	0.42682	ARPs	1.59013	0.646529	1.25608	0.652431	0.956886	0.778313
AC114316.1	7.76502	1.46449	8.16316e-15	6.37793e-14	0.0428166	SVZCs	0.107215	0.0283178	0.122491	0.0461385	0.0933026	0.0923214
LINC01239	10.1995	1.46428	1.99223e-24	1.84935e-23	0.0528736	ARPs	0.0695776	0.0700442	0.182488	0.0566814	0.134457	0.152571
LINC00903	12.6041	1.4636	2.0054e-36	2.95152e-35	0.0714286	SVZCs	0.233162	0.0514862	0.194918	0.0751378	0.0930628	0.298729
CPM	15.6483	1.46191	3.41042e-55	1.16559e-53	0.100122	AR2	0.358415	0.182504	0.272833	0.222799	0.200353	0.107841
SLC15A2	40.1389	1.46144	0	0	0.440926	AR2	1.35835	0.364786	1.10804	0.654294	0.839919	0.551917
ZNF727	9.52434	1.4608	1.6609e-21	1.39982e-20	0.044189	ARPs	0.174764	0.0504483	0.133155	0.0262925	0.104168	0.116469
MTMR10	34.3968	1.45999	2.81331e-259	3.25312e-257	0.286845	ARPs	0.832817	0.3678	0.798854	0.419814	0.617097	0.637201
GLI3	50.2624	1.45994	0	0	0.645292	SVZCs	1.79984	1.25377	1.8468	1.07874	1.54897	1.41895
AMER2	33.0272	1.45826	3.3028e-239	3.43036e-237	0.262835	ARPs	0.808293	0.34259	0.752696	0.386191	0.551721	0.498616
TUBB2A	17.4466	1.45645	3.65516e-68	8.5674e-67	0.0903003	SVZCs	0.566225	0.162117	0.260932	0.103132	0.182562	0.428766
GRIN2C	38.157	1.45618	0	0	0.292411	SVZCs	1.00389	0.642848	0.829407	0.38585	0.459833	0.948148
SLC35F1	24.2778	1.45609	3.36319e-130	1.35662e-127	0.579699	WMAs	1.84573	0.97421	1.80948	0.506596	1.05135	1.85328
TENM3	35.9487	1.45527	5.3078e-283	7.02777e-281	0.421456	ARPs	1.5892	0.724311	1.36499	1.09727	0.835901	1.13055
RBMS3-AS3	21.3707	1.45501	2.5055e-101	7.83024e-100	0.144481	SVZCs	0.353063	0.133123	0.411896	0.170507	0.291466	0.671882
LRRC7	33.0769	1.45393	6.37706e-240	4.25424e-238	0.323255	SVZCs	0.833303	0.379156	0.932845	0.446459	0.687791	0.933506
CLIP4	41.1077	1.45296	0	0	0.49272	ARPs	1.5937	0.721993	1.36045	1.06922	1.12695	1.06891
CBR3-AS1	12.5079	1.45216	6.76024e-36	9.80814e-35	0.0578328	SVZCs	0.112897	0.0622509	0.157563	0.0605018	0.127359	0.160242
AL354754.1	6.97526	1.45195	3.05315e-12	2.11489e-11	0.0375406	SVZCs	0.0856035	0.0276643	0.0966509	0.0364207	0.111358	0.134672
ZNF578	7.3634	1.45107	1.79282e-13	1.31292e-12	0.0282062	SVZCs	0.111413	0.0495257	0.0809991	0.0303917	0.0708239	0.0931318
GABRG1	38.7462	1.44919	0	0	0.439951	AR2	1.60493	0.572793	1.10966	1.02305	1.13435	0.556563
ENHO	28.5161	1.44901	7.39186e-179	5.53831e-177	0.207152	ARPs	0.784781	0.263144	0.599844	0.281478	0.388887	0.36036
LRP4	44.6168	1.4486	0	0	0.465097	SVZCs	1.59013	0.646529	1.25608	0.652431	0.956886	0.778313
KCNMB2	15.4319	1.44823	9.99165e-54	1.90445e-52	0.100894	ARPs	0.230931	0.125424	0.31089	0.118449	0.154058	0.327199
MT-CYB	38.0075	1.44812	0	0	0.423295	SVZCs	1.43365	1.463	1.29978	0.682085	1.07059	0.805143
BDH1	23.614	1.448	2.7688e-123	1.01105e-121	0.123782	SVZCs	0.308573	0.170099	0.339092	0.137985	0.282532	0.319721
TENM2	37.0619	1.44783	1.15656e-300	9.8336e-299	0.475852	SVZCs	1.34311	1.18563	1.63284	0.920159	1.16892	1.30861
TLCD4	29.7145	1.44768	4.99576e-194	4.20638e-192	0.210473	ARPs	0.68178	0.265819	0.604631	0.363318	0.446695	0.458196
USP3	39.9126	1.4466	0	0	0.387175	SVZCs	1.03874	0.479668	1.03754	0.511961	0.996776	0.967359
PDGFC	37.0295	1.4463	3.84611e-300	3.25419e-298	0.296672	SVZCs	0.74311	0.448461	0.8846	0.419911	0.66185	0.638455
NID1	24.525	1.44533	7.99939e-133	4.19182e-131	0.150702	ARPs	0.407904	0.19441	0.460201	0.116435	0.31412	0.345735
LINC01877	8.3623	1.44497	6.15088e-17	4.45271e-16	0.0452107	ARPs	0.0879075	0.0527615	0.137589	0.0636459	0.099337	0.160308
GMNN	19.805	1.44311	2.69742e-87	8.86112e-86	0.121839	ARPs	0.538242	0.145726	0.35527	0.225492	0.508331	0.170671
ABTB2	18.4977	1.44303	2.15543e-76	5.47779e-75	0.0907062	SVZCs	0.235762	0.181406	0.299761	0.12094	0.149818	0.515832
PDE3A	39.1458	1.44282	0	0	0.398133	SVZCs	1.28138	0.756567	1.32568	0.701613	0.713017	0.904034
AC107398.3	33.7323	1.44241	1.94256e-249	2.12579e-247	0.260026	ARPs	0.844689	0.340276	0.742699	0.349309	0.48696	0.479356
FGFR3	45.3392	1.44166	0	0	0.516234	SVZCs	0.995088	0.78495	1.36601	0.729892	1.17859	0.930208
PAPLN	39.5697	1.44077	0	0	0.426564	ARPs	1.54497	0.64102	1.23515	0.798464	1.27175	0.763686
AC020907.1	10.0648	1.43991	7.90363e-24	8.63549e-23	0.0426136	SVZCs	0.12463	0.0652015	0.125199	0.0479901	0.0913673	0.146423
CAMK2G	44.8469	1.43961	0	0	0.572473	AR2	1.47608	1.5122	1.44555	1.49659	1.79759	0.78665
PREX2	64.5764	1.43923	0	0	0.88819	SVZCs	2.89363	1.72139	2.88996	1.98324	2.136	2.69141
APOC1	12.977	1.43907	1.65205e-38	1.44721e-36	0.20222	WMAs	1.11967	0.137762	0.536763	0.0815286	0.232715	0.788384
NCKAP5	44.7438	1.43866	0	0	0.666748	AR2	1.91632	1.15628	1.9715	2.10373	1.49583	1.18796
PHACTR3	46.5265	1.43849	0	0	0.609781	SVZCs	1.73475	1.21655	1.75413	1.01632	1.42682	1.93489
AC104827.1	22.5497	1.43845	1.35057e-112	5.95317e-111	0.158621	ARPs	0.557202	0.193954	0.457497	0.371634	0.334722	0.574066
TSPAN12	10.6351	1.43836	2.04625e-26	2.01203e-25	0.0498084	ARPs	0.149739	0.0601585	0.155328	0.0891874	0.086657	0.0986912
MT-ND3	36.5152	1.43705	6.35985e-292	5.20338e-290	0.475649	SVZCs	1.89313	1.62488	1.4849	0.815829	1.2759	0.767701
SH3RF3	16.6788	1.4363	1.86975e-62	2.70256e-60	0.240285	WMAs	0.860966	0.520166	0.697196	0.525155	0.316642	0.836748
SPRY4-AS1	22.3292	1.43549	1.92273e-110	8.27539e-109	0.143806	ARPs	0.373922	0.191897	0.45246	0.155256	0.28384	0.530016
TUSC7	8.78887	1.43525	1.51078e-18	1.37268e-17	0.0525568	SVZCs	0.106876	0.0317916	0.131545	0.0506813	0.0675743	0.223976
ACAA2	15.5178	1.43509	2.62982e-54	5.09656e-53	0.0796935	ARPs	0.242133	0.0900953	0.227078	0.107949	0.135141	0.246393
FAM204A	33.5529	1.43454	8.15827e-247	8.84407e-245	0.284291	ARPs	0.946152	0.358888	0.773328	0.541286	0.498806	0.555093
HOPX	22.5512	1.4345	1.30702e-112	5.76849e-111	0.134866	ARPs	0.667593	0.179677	0.426582	0.105552	0.404825	0.697423
POU3F2	27.298	1.43414	4.47716e-164	5.30078e-162	0.208283	AR2	0.553557	0.393093	0.511296	0.511694	0.466451	0.220742
SLCO1A2	6.8366	1.43353	8.10933e-12	8.63982e-11	0.038246	AR2	0.122548	0.0969669	0.103116	0.136756	0.29013	0.0394261
RIDA	26.8911	1.43327	2.79155e-159	1.82028e-157	0.179566	ARPs	0.7917	0.217592	0.504681	0.221014	0.513122	0.38116
GSTM5	14.74	1.43327	3.56589e-49	1.09664e-47	0.0855055	AR2	0.446242	0.140528	0.224868	0.246024	0.102917	0.0892665
MT-ATP6	38.0969	1.4322	0	0	0.504058	SVZCs	1.89779	1.8445	1.58979	0.89454	1.38937	0.977328
DPP10	30.163	1.4317	7.24403e-200	9.30724e-198	0.808554	AR1	2.97949	4.90545	3.93936	4.39643	2.5974	4.3329
NKAIN3-IT1	12.5546	1.43154	3.75118e-36	4.81957e-35	0.0556833	ARPs	0.0894867	0.0663933	0.169881	0.0692896	0.0933267	0.122468
AC138150.1	16.7829	1.43037	3.25446e-63	1.06106e-61	0.129473	AR1	0.117727	0.302335	0.290222	0.288004	0.333052	0.243748
ZNF710-AS1	9.57242	1.42977	1.04427e-21	1.34868e-20	0.0683736	AR1	0.0602389	0.123252	0.154671	0.0809196	0.173604	0.109941
SHROOM2	20.2388	1.42973	4.46134e-91	1.53688e-89	0.0978289	ARPs	0.305394	0.124738	0.305936	0.156955	0.198274	0.180694
MTRNR2L12	22.9993	1.42952	4.73194e-117	3.5075e-115	0.190987	AR2	0.583969	0.716679	0.496499	0.243897	0.385953	0.214064
FAM171B	26.7404	1.42831	1.59758e-157	9.72283e-155	0.65345	WMAs	1.93275	0.763342	1.71742	0.954227	0.992551	1.10461
GDF10	7.40156	1.42399	1.34591e-13	9.91495e-13	0.0320617	SVZCs	0.184766	0.0576272	0.0883285	0.0338368	0.0522611	0.0856174
TMEM51	7.0858	1.42386	1.38241e-12	4.18827e-11	0.0705789	WMAs	0.23066	0.165626	0.184865	0.0673232	0.0729546	0.146661
TTPA	29.8951	1.42377	2.27602e-196	1.94951e-194	0.233206	ARPs	0.715642	0.288154	0.639733	0.311135	0.515677	0.39247
AL354863.1	9.07416	1.42335	1.14561e-19	1.69617e-18	0.0472594	AR2	0.175494	0.0236569	0.126618	0.017405	0.0258301	0.0491025
MT-ND1	34.526	1.42274	3.26667e-261	2.40596e-259	0.326705	SVZCs	1.12133	1.12368	0.980993	0.483559	0.761676	0.578242
AC023095.1	39.9156	1.42233	0	0	0.430195	SVZCs	1.30362	0.564229	1.17452	0.60677	0.85114	0.610202
PRR5	27.4541	1.42226	6.20737e-166	4.27249e-164	0.166284	ARPs	0.5063	0.213321	0.49303	0.100444	0.203647	0.455589
C5orf30	16.0705	1.42217	4.1088e-58	8.55036e-57	0.0825032	ARPs	0.213656	0.0936834	0.233645	0.127719	0.153929	0.136261
SELENBP1	18.339	1.42178	4.04206e-75	1.12086e-73	0.0980843	ARPs	0.31074	0.111709	0.275084	0.134734	0.126421	0.201104
ATL2	37.1024	1.42143	2.56828e-301	2.19985e-299	0.330966	SVZCs	0.783051	0.27912	0.844461	0.402342	0.601008	0.589396
MIR181A1HG	13.1616	1.42079	1.45942e-39	3.72806e-38	0.0838002	AR2	0.284183	0.0910326	0.226056	0.0626771	0.128284	0.090516
RMST	32.9298	1.42038	8.23759e-238	8.53021e-236	0.314687	ARPs	0.928944	0.473373	0.963322	0.871142	0.512791	0.595287
ESRRG	42.9293	1.42022	0	0	0.651644	AR2	2.183	0.759801	1.94752	0.768076	1.54008	1.17747
AL078587.2	8.4605	1.41891	2.66228e-17	1.1034e-15	0.0967486	WMAs	0.270331	0.149722	0.248812	0.22496	0.100437	0.35624
ATP8A1	17.8511	1.4189	2.83521e-71	4.86899e-69	0.31245	WMAs	0.788339	0.399424	0.805731	0.487639	0.38058	0.646393
BRINP2	29.0527	1.41847	1.42195e-185	1.11854e-183	0.202043	ARPs	0.505238	0.303334	0.666406	0.280553	0.582534	0.390549
PLEKHA6	30.7554	1.41845	1.03462e-207	1.65397e-205	0.280146	AR2	0.744612	0.563778	0.696884	0.591825	0.82588	0.319845
PTCH1	31.6115	1.41814	2.56328e-219	4.49092e-217	0.302801	AR2	0.783441	0.196036	0.75552	0.289659	0.745492	0.352317
LINC02649	34.9021	1.41779	6.91114e-267	1.32457e-264	0.473669	AR1	0.571388	1.21371	1.11815	0.825817	1.02345	1.79484
ZNF680	38.4121	1.41719	0	0	0.428608	ARPs	1.50974	0.599106	1.16041	0.847655	0.937027	0.912143
APOLD1	12.0753	1.41692	1.42597e-33	3.22469e-32	0.0779537	AR2	0.463481	0.246466	0.221964	0.468889	0.288099	0.0889956
LYSMD2	11.527	1.41509	9.64645e-31	1.25803e-29	0.0478896	SVZCs	0.173802	0.0523013	0.13859	0.0542446	0.063184	0.114003
KLHL2	27.3494	1.41486	1.09629e-164	7.4716e-163	0.199745	ARPs	0.556518	0.251068	0.565863	0.271497	0.572496	0.706284
CIRBP	34.5256	1.41467	3.31765e-261	6.22104e-259	0.421007	AR1	0.467451	0.599157	0.951164	0.530045	0.720052	1.03966
AC093610.1	9.23121	1.41456	2.67582e-20	1.29462e-18	0.114195	WMAs	0.201365	0.263011	0.334402	0.358921	0.138861	0.655635
TNIK	60.4288	1.41453	0	0	0.942529	ARPs	3.53596	2.60258	3.53566	2.80177	3.19634	3.13357
C2CD6	9.68253	1.41355	3.57748e-22	1.84677e-20	0.113402	WMAs	0.287004	0.0906519	0.31547	0.157985	0.130355	0.208616
AL121987.1	6.98988	1.41352	2.75116e-12	1.66036e-11	0.0342273	ARPs	0.133101	0.0382951	0.0989324	0.0786464	0.0410572	0.0866605
CADM2	75.6705	1.41228	0	0	0.974635	SVZCs	4.23145	2.85543	4.00762	3.05846	3.99778	3.40054
MIR181A1HG	13.752	1.4122	4.95703e-43	7.50915e-42	0.0722861	ARPs	0.284183	0.0910326	0.226056	0.0626771	0.128284	0.090516
AC023095.1	37.015	1.41147	6.56773e-300	1.85231e-297	0.453106	AR2	1.30362	0.564229	1.17452	0.60677	0.85114	0.610202
LGR4	39.9159	1.41058	0	0	0.566794	ARPs	1.85211	0.997839	1.71422	1.03691	1.52395	1.7199
ADRA1A	25.5345	1.41054	8.1563e-144	8.08406e-142	0.234348	AR2	0.629414	1.00702	0.647033	1.19658	0.975154	0.294358
PDE3A	20.9608	1.41037	1.49684e-97	3.60594e-95	0.417922	WMAs	1.28138	0.756567	1.32568	0.701613	0.713017	0.904034
CBR3-AS1	11.5859	1.40977	4.86079e-31	5.44817e-30	0.0544061	ARPs	0.112897	0.0622509	0.157563	0.0605018	0.127359	0.160242
ARFGEF3	25.2657	1.40975	7.61047e-141	3.13176e-139	0.157873	SVZCs	0.39502	0.36781	0.444389	0.191114	0.298494	0.430583
PON2	46.154	1.40959	0	0	0.665645	ARPs	2.44315	1.15091	1.90822	1.45947	1.57082	1.56377
MEIKIN	29.7698	1.40949	9.6009e-195	8.1233e-193	0.264112	ARPs	0.864662	0.405743	0.84558	0.391657	0.535456	0.621902
RIDA	28.7745	1.4082	4.47793e-182	2.31504e-180	0.193994	SVZCs	0.7917	0.217592	0.504681	0.221014	0.513122	0.38116
USP3-AS1	16.878	1.40748	6.52645e-64	1.50834e-62	0.102427	ARPs	0.25815	0.122108	0.296042	0.185143	0.20485	0.332301
CTH	15.8308	1.40735	1.90694e-56	3.82601e-55	0.0799489	ARPs	0.391791	0.0921865	0.228052	0.159062	0.253681	0.205753
PCDH9-AS4	15.4862	1.40669	4.29853e-54	8.56988e-53	0.10349	SVZCs	0.280584	0.0600472	0.265102	0.108403	0.13648	0.38725
GRID1	48.6473	1.40665	0	0	0.634131	SVZCs	1.72943	1.09196	1.7779	1.04899	1.55152	1.70082
CNTNAP3	32.0747	1.40582	9.92328e-226	6.18022e-224	0.26664	SVZCs	0.767792	0.472207	0.700708	0.32435	0.368622	0.774974
HPSE2	36.7296	1.40568	2.46521e-295	6.73371e-293	0.705481	AR2	2.90651	1.56144	2.64441	1.83682	3.54789	1.78088
PURG	33.9505	1.40566	1.19833e-252	1.32389e-250	0.347382	ARPs	0.978021	0.463259	0.940452	0.608669	0.624651	0.620008
AC058791.1	16.84	1.40544	1.2415e-63	2.85027e-62	0.10447	ARPs	0.537213	0.116638	0.283457	0.224499	0.220752	0.437433
RPS6KL1	11.8149	1.40521	3.26745e-32	4.36625e-31	0.0594562	SVZCs	0.133577	0.112088	0.152569	0.0603716	0.105898	0.288036
FGFR2	24.1593	1.40512	5.95947e-129	2.32285e-126	0.538462	WMAs	1.22445	0.870452	1.42845	0.902575	0.787458	1.75537
DCHS2	26.318	1.40438	1.19309e-152	7.49787e-151	0.254151	ARPs	1.01152	0.373975	0.788655	0.586121	0.350305	0.542428
AP000844.2	7.10443	1.40434	1.20822e-12	7.39602e-12	0.0362708	ARPs	0.113148	0.0396017	0.101588	0.0510141	0.0435115	0.130543
CHST7	12.6357	1.40403	1.34265e-36	1.74771e-35	0.0587484	ARPs	0.178999	0.0687616	0.172585	0.0555348	0.100553	0.180942
AL442067.3	8.78333	1.40271	1.58709e-18	2.26196e-17	0.0521315	AR2	0.0688913	0.0942548	0.128046	0.0865508	0.12779	0.0503761
AC007389.1	34.1074	1.40261	5.7287e-255	6.38999e-253	0.415581	ARPs	1.40102	0.720366	1.33228	0.496017	1.18529	1.21118
NCEH1	21.5426	1.40173	6.20901e-103	1.95632e-101	0.118709	SVZCs	0.295678	0.198813	0.334507	0.140066	0.435558	0.31218
CNTNAP3C	8.82674	1.4015	1.07775e-18	9.85426e-18	0.0377435	SVZCs	0.0880223	0.0579048	0.0957384	0.0373264	0.0397417	0.122856
PYGL	12.2845	1.40133	1.09679e-34	1.55233e-33	0.0629058	SVZCs	0.214692	0.0972768	0.174233	0.0695785	0.0748248	0.420791
STK32A	19.4747	1.40035	1.79921e-84	9.01947e-83	0.183922	AR2	0.647103	0.575421	0.509245	0.598904	1.32025	0.224392
CA8	41.4661	1.40029	0	0	0.529627	SVZCs	1.77141	0.815487	1.54587	0.874944	0.694253	1.55359
AL137017.1	7.64852	1.40003	2.03309e-14	2.44889e-13	0.0496955	AR2	0.0534842	0.0325095	0.13052	0.0238371	0.0569258	0.0514812
AMPH	14.4385	1.39982	2.96114e-47	4.90553e-46	0.0710089	ARPs	0.251523	0.0924816	0.227669	0.0515094	0.163764	0.157989
MKRN3	27.4057	1.39966	2.3482e-165	1.12357e-163	0.191356	SVZCs	0.458789	0.256759	0.504466	0.222083	0.315398	0.337693
CHKA	39.771	1.39915	0	0	0.479693	ARPs	1.37589	0.727864	1.34124	0.797964	1.00724	1.09399
A2ML1	18.1066	1.399	2.82782e-73	1.25604e-71	0.127406	AR2	0.27423	0.207372	0.306992	0.24616	0.288553	0.127738
AC107398.3	35.6673	1.39772	1.26906e-278	9.87075e-277	0.29444	SVZCs	0.844689	0.340276	0.742699	0.349309	0.48696	0.479356
EMX2OS	21.9955	1.39701	3.18296e-107	9.12535e-105	0.411578	WMAs	1.42993	0.696282	1.0862	0.667332	0.556971	1.1818
ZBTB34	13.6792	1.39691	1.35104e-42	2.01321e-41	0.0646232	ARPs	0.215647	0.0716105	0.178559	0.0790628	0.145821	0.09557
CCND3	26.1947	1.39663	3.051e-151	3.18793e-149	0.2419	AR2	0.7752	0.441593	0.607808	0.40862	0.709222	0.275871
SYNE1	52.3396	1.39657	0	0	0.818646	ARPs	2.7141	1.72195	2.5725	2.10959	2.31204	2.4257
PAQR8	21.541	1.39649	6.43658e-103	4.09697e-101	0.164434	AR2	0.447822	0.220251	0.379735	0.222413	0.365084	0.161654
SNTA1	39.2286	1.39611	0	0	0.438002	AR2	1.40037	0.760175	1.04353	0.797389	0.959707	0.529931
AC009560.4	11.2832	1.39608	1.58825e-29	1.70524e-28	0.0505747	ARPs	0.15069	0.0624768	0.156726	0.0884014	0.326935	0.154845
PRSS23	13.8923	1.39595	7.05564e-44	1.59557e-42	0.11609	AR1	0.119826	0.250302	0.288937	0.135175	0.223717	0.587606
PKIA-AS1	16.7624	1.3954	4.60048e-63	1.0204e-61	0.127029	SVZCs	0.323117	0.171027	0.387266	0.165333	0.314617	0.393805
PBX1	52.979	1.39537	0	0	0.8	AR2	2.39557	1.70892	2.31306	2.06301	2.20802	1.49546
CEP85L	42.4451	1.39513	0	0	0.607663	ARPs	1.76378	1.01991	1.73396	1.18864	1.45079	1.40011
GABRG1	35.7463	1.39491	7.54426e-280	9.91328e-278	0.390805	ARPs	1.60493	0.572793	1.10966	1.02305	1.13435	0.556563
HDAC2-AS2	24.8292	1.3947	4.34119e-136	1.73698e-134	0.166599	SVZCs	0.449404	0.259331	0.488597	0.214801	0.31675	0.323364
STK39	21.4403	1.39443	5.62277e-102	1.45563e-99	0.417922	WMAs	1.0628	0.647712	1.08727	0.703875	0.558429	1.16329
AL356737.2	16.356	1.39266	3.93963e-60	5.46664e-58	0.297383	WMAs	0.754955	0.11265	0.759712	0.14212	0.359974	1.02343
NR2E1	10.826	1.3917	2.59102e-27	1.63126e-25	0.128469	WMAs	0.395008	0.105162	0.296155	0.113061	0.123422	0.302935
LINC01414	7.94181	1.3912	1.99248e-15	7.42418e-14	0.103886	WMAs	0.184414	0.0494308	0.331238	0.0668994	0.139512	0.167859
PPP1R3C	28.9058	1.39091	1.01047e-183	5.28704e-182	0.173093	SVZCs	1.13279	0.543902	0.612424	0.279281	0.638758	0.87191
AL122014.1	11.8235	1.39022	2.95015e-32	6.42036e-31	0.0779537	AR2	0.155835	0.0540615	0.205348	0.0971636	0.067089	0.0833898
PTPRG-AS1	15.802	1.3902	3.01183e-56	6.18228e-55	0.0795455	SVZCs	0.187292	0.133195	0.250285	0.103006	0.127686	0.22458
AL135878.1	10.4458	1.39006	1.53081e-25	2.73308e-24	0.0655298	AR2	0.282404	0.114718	0.194878	0.200056	0.0920728	0.0788988
DMD	38.4665	1.38987	0	0	0.464068	AR2	1.21594	0.89369	1.19669	1.27336	1.12071	0.631893
AC010632.1	7.07327	1.38981	1.51327e-12	9.21456e-12	0.0316731	ARPs	0.118637	0.0343575	0.087641	0.0672104	0.0523939	0.0848908
CDH10	36.7587	1.38936	8.45162e-296	7.03085e-294	0.365869	SVZCs	1.38702	0.39185	1.05667	0.540247	0.97873	0.48433
AC036214.1	24.7606	1.38911	2.38603e-135	1.29533e-133	0.16424	ARPs	0.351541	0.231361	0.519867	0.14646	0.548068	0.351303
AL354771.1	11.3405	1.38906	8.26807e-30	1.05293e-28	0.065138	SVZCs	0.247517	0.0323654	0.187193	0.0756641	0.0877779	0.17151
AP003025.1	17.2554	1.38827	1.01938e-66	2.47115e-65	0.102937	ARPs	0.272139	0.125108	0.299256	0.165926	0.14695	0.402153
SFXN5	58.9064	1.38807	0	0	0.820414	SVZCs	2.49604	1.7685	2.35518	1.53579	1.97749	2.25592
PCSK6	10.0292	1.38792	1.13382e-23	1.2299e-22	0.0489042	SVZCs	0.125937	0.0874948	0.135115	0.0538063	0.0547509	0.125425
MIR2052HG	16.1902	1.38759	5.91586e-59	1.79233e-57	0.155077	AR1	0.185901	0.13067	0.42823	0.12979	0.227278	0.189511
SCRG1	26.4887	1.38689	1.30949e-154	5.90719e-153	0.191356	SVZCs	1.11532	0.196617	0.492681	0.217903	0.262567	0.4838
ADORA2B	18.7859	1.38659	9.84395e-79	2.88174e-77	0.100383	ARPs	0.304428	0.124611	0.297862	0.0472731	0.108492	0.374942
RIPOR2	33.0933	1.38572	3.71175e-240	3.89005e-238	0.293487	ARPs	0.986415	0.440752	0.894982	0.44551	0.857444	0.408412
CRIM1	38.5324	1.38554	0	0	0.381696	SVZCs	0.956608	0.627376	1.02849	0.523387	0.782999	1.37444
NOL4	38.0728	1.3844	0	0	0.404018	SVZCs	1.18835	0.62604	1.14482	0.599078	0.773467	1.16922
SCG3	24.9899	1.3844	7.8713e-138	4.34802e-136	0.187995	ARPs	0.649347	0.237642	0.530813	0.201844	0.241142	0.413568
UQCRB	26.9014	1.38439	2.11308e-159	9.83931e-158	0.203328	SVZCs	1.51238	0.253328	0.553064	0.249132	0.463208	0.380487
CASTOR1	10.0934	1.38413	5.91022e-24	5.40252e-23	0.0431673	ARPs	0.121216	0.0514207	0.129032	0.0200041	0.0789178	0.121219
AC073050.1	38.2379	1.3839	0	0	0.613282	ARPs	2.02267	1.24544	2.00925	0.961199	0.737455	1.68644
AGMO	8.21533	1.38346	2.11578e-16	1.76987e-15	0.0509334	SVZCs	0.0999799	0.127925	0.163378	0.0658144	0.409023	0.0728417
ST6GAL2	12.5142	1.38259	6.24499e-36	1.19426e-34	0.0997963	AR1	0.103687	0.306539	0.250652	0.122335	0.241298	0.103939
FAM184A	27.0111	1.38255	1.09327e-160	7.15579e-158	0.647105	WMAs	1.93375	0.903278	1.69365	1.01909	0.994232	1.66973
GLRB	13.2732	1.38228	3.31208e-40	4.67628e-39	0.0636015	ARPs	0.21404	0.0799229	0.196303	0.0945251	0.164381	0.152054
NRP1	22.106	1.38213	2.76798e-108	1.64985e-106	0.274949	AR1	0.317863	0.16881	0.680737	0.020935	0.0786286	1.30623
AL360015.1	11.1103	1.38202	1.11758e-28	1.16845e-27	0.065645	ARPs	0.163498	0.0880837	0.215103	0.189818	0.188288	0.139079
ASF1A	13.2174	1.38008	6.96625e-40	9.75612e-39	0.0643678	ARPs	0.325785	0.0719599	0.177479	0.0880129	0.121648	0.117909
FAM221A	14.6543	1.37914	1.26442e-48	2.16235e-47	0.0753512	ARPs	0.233265	0.0829489	0.20291	0.118343	0.148516	0.251112
ST6GAL2	14.2964	1.37891	2.30518e-46	6.69738e-45	0.088916	AR2	0.103687	0.306539	0.250652	0.122335	0.241298	0.103939
SLC22A23	31.9412	1.37866	7.15122e-224	6.87191e-222	0.279438	ARPs	0.766069	0.377153	0.784473	0.439466	0.614366	0.831074
FAM27C	8.41186	1.37842	4.03545e-17	4.43427e-16	0.0663369	AR1	0.0568196	0.298452	0.141499	0.262137	0.155647	0.148788
GPC5-AS2	15.7014	1.37788	1.4791e-55	1.85906e-53	0.256939	WMAs	0.587524	0.104722	0.646258	0.11801	0.299758	0.867188
PTAR1	34.9246	1.37761	3.15087e-267	3.9177e-265	0.363474	ARPs	1.21766	0.489243	0.970699	0.620472	0.658331	0.788259
LINC01338	12.6541	1.37739	1.06181e-36	2.54556e-35	0.0811206	AR2	0.38504	0.1879	0.198582	0.319103	0.311161	0.0811695
STXBP5	54.7926	1.37575	0	0	0.754058	SVZCs	2.47725	1.20157	2.11411	1.33663	1.96305	1.80108
AL160254.1	21.6043	1.37485	1.63671e-103	5.18516e-102	0.167411	SVZCs	0.434012	0.11703	0.414789	0.180832	0.241384	0.576966
AC091826.2	42.6657	1.37476	0	0	0.554992	SVZCs	1.1005	0.75071	1.61181	0.934934	1.19867	1.13175
SGIP1	43.3776	1.37269	0	0	0.574472	SVZCs	1.64275	1.43482	1.64373	0.960135	1.49209	1.51238
FZD4	11.0503	1.37234	2.18392e-28	2.68177e-27	0.0535714	SVZCs	0.1068	0.0814541	0.140753	0.0567397	0.0683976	0.228986
AZIN1-AS1	28.1038	1.37122	8.79733e-174	9.50715e-172	0.332267	AR1	0.382496	0.74789	0.790878	0.854667	0.939168	0.59436
ARSF	8.96605	1.37086	3.07344e-19	2.85838e-18	0.0440341	SVZCs	0.112752	0.0585365	0.119355	0.0478532	0.113114	0.0408132
FAM198B-AS1	25.2124	1.37064	2.92959e-140	2.79196e-138	0.245311	AR2	0.706946	0.425728	0.626857	0.407998	0.79301	0.290511
GLDC	23.37	1.37042	8.62903e-121	4.07822e-119	0.145083	ARPs	0.46796	0.182691	0.417552	0.194485	0.272625	0.417644
PLEKHO1	13.1011	1.36955	3.24637e-39	2.89503e-37	0.149881	WMAs	0.479414	0.191626	0.382926	0.220361	0.165996	0.417406
AC093157.1	24.8187	1.36928	5.63185e-136	3.07184e-134	0.176245	ARPs	0.639777	0.223214	0.498399	0.24286	0.488326	0.340108
ARSG	19.2802	1.36909	7.87529e-83	2.12107e-81	0.112013	SVZCs	0.189719	0.255724	0.304077	0.128901	0.382283	0.291045
IDI2-AS1	9.30998	1.36816	1.27854e-20	1.25432e-19	0.0474838	SVZCs	0.196879	0.0767165	0.121143	0.0486854	0.113536	0.0532906
NKAIN3-IT1	13.0858	1.36783	3.96714e-39	6.14924e-38	0.0633117	SVZCs	0.0894867	0.0663933	0.169881	0.0692896	0.0933267	0.122468
HHIPL1	24.8538	1.36671	2.35456e-136	9.45367e-135	0.144683	SVZCs	0.432382	0.208533	0.379593	0.164693	0.20244	0.30118
RIPOR2	35.5859	1.36655	2.31391e-277	1.79173e-275	0.331372	SVZCs	0.986415	0.440752	0.894982	0.44551	0.857444	0.408412
GPM6A	63.7713	1.36547	0	0	0.971903	ARPs	4.18696	3.25174	4.17424	3.51589	3.70992	3.60503
LINC01102	8.27333	1.36503	1.30266e-16	1.10218e-15	0.0342938	SVZCs	0.0854078	0.0306541	0.108922	0.043706	0.0862078	0.0445114
FAM153A	8.3406	1.365	7.39128e-17	5.33729e-16	0.0367816	ARPs	0.0746994	0.0426631	0.106401	0.0453212	0.0743585	0.101695
PON3	12.3933	1.36338	2.83941e-35	3.57398e-34	0.0735632	ARPs	0.235039	0.0905255	0.218153	0.146324	0.174666	0.130562
ZBTB20-AS5	27.1446	1.36279	2.93377e-162	1.97617e-160	0.237037	ARPs	0.913517	0.31039	0.66064	0.66422	0.434958	0.84882
BBOX1-AS1	11.5395	1.36267	8.34494e-31	9.28733e-30	0.0710089	ARPs	0.201553	0.0808783	0.196085	0.187537	0.246715	0.270452
INTU	41.249	1.3619	0	0	0.580843	ARPs	1.87148	0.931919	1.60071	1.22494	1.16741	1.69367
CLDN10	24.8318	1.36185	4.06599e-136	2.22125e-134	0.172414	ARPs	0.606951	0.212135	0.474596	0.170134	0.262945	0.324964
AL445928.2	7.07654	1.36183	1.47796e-12	9.00271e-12	0.0385696	ARPs	0.0935187	0.04397	0.109329	0.0783102	0.0605554	0.142923
SCG3	14.1617	1.36067	1.58183e-45	1.62348e-43	0.214116	WMAs	0.649347	0.237642	0.530813	0.201844	0.241142	0.413568
ATP5F1E	26.6434	1.36049	2.13433e-156	9.79364e-155	0.214286	SVZCs	1.88434	0.328898	0.589614	0.272195	0.362225	0.49666
PLIN5	37.1858	1.35978	1.15874e-302	9.97437e-301	0.352273	SVZCs	1.04029	0.457395	0.88995	0.444133	1.04386	0.692982
PLA2G5	13.9455	1.35943	3.35249e-44	5.20815e-43	0.0607918	ARPs	0.276498	0.07349	0.178703	0.0389554	0.195647	0.14372
CTXND1	22.2371	1.35868	1.505e-109	1.03383e-107	0.176127	AR2	0.910757	0.194087	0.470595	0.240001	0.620138	0.21053
LRRN3	23.7709	1.35796	6.68859e-125	2.47364e-123	0.158888	SVZCs	0.360213	0.141263	0.409038	0.179953	0.288208	0.283401
LHX2	28.4621	1.35774	3.455e-178	2.57197e-176	0.213793	ARPs	0.89128	0.274934	0.593875	0.275323	0.117063	0.380651
HEPH	28.8129	1.35716	1.47852e-182	1.14231e-180	0.221967	ARPs	0.734899	0.28537	0.613047	0.378568	0.497458	0.443126
MIR2052HG	17.7489	1.35715	1.7569e-70	7.45983e-69	0.148356	AR2	0.185901	0.13067	0.42823	0.12979	0.227278	0.189511
UQCRB	24.6129	1.35713	9.18041e-134	4.88449e-132	0.195658	ARPs	1.51238	0.253328	0.553064	0.249132	0.463208	0.380487
HSD17B11	13.9292	1.35696	4.20879e-44	6.50927e-43	0.0763729	ARPs	0.253653	0.0850139	0.204802	0.118978	0.160192	0.112846
LHX2	31.111	1.3554	1.7095e-212	1.00855e-210	0.220779	SVZCs	0.89128	0.274934	0.593875	0.275323	0.117063	0.380651
PCDH9-AS2	33.7616	1.35441	7.21526e-250	5.05651e-248	0.425325	SVZCs	1.38523	0.365281	1.16108	0.619404	0.707607	1.4091
C1orf54	20.3486	1.35344	4.77845e-92	1.66097e-90	0.13129	ARPs	0.53461	0.154165	0.35481	0.182305	0.292982	0.338148
SPATC1	8.19683	1.35329	2.46809e-16	2.05912e-15	0.0462662	SVZCs	0.122177	0.0625097	0.113849	0.0461161	0.103291	0.128228
MBNL3	14.1828	1.3529	1.17042e-45	2.05059e-44	0.0771104	SVZCs	0.268761	0.0854484	0.227456	0.0953022	0.086936	0.148239
RANBP3L	46.512	1.35289	0	0	0.751766	AR2	2.60467	1.23395	2.14298	1.56781	1.7015	1.3727
LGALS3	8.66784	1.35159	4.40388e-18	1.91682e-16	0.111816	WMAs	0.300368	0.24926	0.255823	0.156988	0.10817	0.481607
AC138123.1	7.15459	1.34794	8.39219e-13	7.66023e-12	0.059936	AR1	0.0705638	0.193445	0.170677	0.216502	0.191757	0.127869
AC092691.1	60.7032	1.34635	0	0	0.923093	SVZCs	3.27692	2.7543	3.30087	2.42294	3.1781	3.3177
STARD13-AS	14.9694	1.34506	1.16342e-50	2.07823e-49	0.101149	ARPs	0.403773	0.116545	0.273087	0.215386	0.219203	0.466971
ERI2	20.4102	1.34468	1.35621e-92	4.75221e-91	0.12516	ARPs	0.263322	0.145159	0.334161	0.197962	0.262728	0.312088
SFTPD	8.6223	1.34459	6.56223e-18	4.91247e-17	0.0469987	ARPs	0.107535	0.056588	0.137894	0.172706	0.0641492	0.172733
FAM199X	24.515	1.34404	1.02271e-132	5.34303e-131	0.185696	ARPs	0.738997	0.214185	0.473967	0.273077	0.473007	0.386574
ZNF277	31.5741	1.34368	8.3635e-219	7.79919e-217	0.301149	ARPs	0.887671	0.406101	0.820399	0.446349	0.600957	0.624507
NSUN3	24.4382	1.34361	6.7235e-132	3.46565e-130	0.179566	ARPs	0.432349	0.219404	0.484045	0.290611	0.324728	0.391192
AL137017.1	6.90178	1.3435	5.13535e-12	4.51001e-11	0.0517894	AR1	0.0534842	0.0325095	0.13052	0.0238371	0.0569258	0.0514812
LINC01896	24.0513	1.3425	8.08122e-128	3.03396e-126	0.143466	SVZCs	0.447817	0.134613	0.387235	0.170993	0.214936	0.334498
CPE	52.0054	1.34248	0	0	0.860536	ARPs	3.33066	1.98276	2.82622	2.28968	2.52829	2.36224
PKIA-AS1	15.4167	1.34233	1.2648e-53	2.4068e-52	0.12235	ARPs	0.323117	0.171027	0.387266	0.165333	0.314617	0.393805
COPS9	21.4718	1.34233	2.85503e-102	1.13971e-100	0.165262	ARPs	1.51683	0.207461	0.46032	0.186992	0.184218	0.426004
AC027018.1	13.3719	1.34232	8.82311e-41	1.26634e-39	0.0906769	ARPs	0.275827	0.103074	0.243178	0.166801	0.148708	0.316525
SOX21-AS1	24.4565	1.34229	4.29197e-132	2.2189e-130	0.195658	ARPs	0.510173	0.254265	0.550473	0.374689	0.30456	0.289847
SCN11A	14.3191	1.33988	1.66192e-46	3.98976e-45	0.141111	AR1	0.147469	0.183797	0.338055	0.196021	0.320644	0.255264
TBPL1	14.0803	1.3389	5.02123e-45	7.92839e-44	0.0750958	ARPs	0.324252	0.0857301	0.204106	0.133512	0.159333	0.172396
LINC01102	7.04482	1.3381	1.85698e-12	2.03792e-11	0.0409257	AR2	0.0854078	0.0306541	0.108922	0.043706	0.0862078	0.0445114
ENHO	29.3697	1.33802	1.34049e-189	7.19841e-188	0.228084	SVZCs	0.784781	0.263144	0.599844	0.281478	0.388887	0.36036
PCDH9-AS3	8.58959	1.33681	8.72792e-18	7.70804e-17	0.0497159	SVZCs	0.126165	0.0290018	0.11891	0.0487799	0.0560717	0.157752
CACNA1B	25.9521	1.33644	1.72323e-148	1.04875e-146	0.183653	ARPs	0.691657	0.254692	0.549561	0.177921	0.493794	0.400733
CSDC2	13.7485	1.33603	5.19797e-43	7.86726e-42	0.067433	ARPs	0.272301	0.084583	0.201164	0.100637	0.15269	0.203738
LINC00299	42.1768	1.33598	0	0	0.747637	ARPs	2.22941	1.59997	2.39598	1.21043	2.18964	2.25905
RWDD3	24.2188	1.33532	1.41036e-129	7.07016e-128	0.171392	ARPs	0.44735	0.196935	0.437763	0.251747	0.314961	0.357913
AC004158.1	22.9126	1.33508	3.4799e-116	2.54143e-114	0.204385	AR2	0.296823	0.26127	0.509029	0.527812	0.51856	0.233539
AC024145.1	17.5458	1.33472	6.40276e-69	1.51405e-67	0.119318	SVZCs	0.328472	0.153434	0.311292	0.135218	0.138107	0.602387
ATP8A1	29.1864	1.33471	2.88777e-187	2.31355e-185	0.280715	ARPs	0.788339	0.399424	0.805731	0.487639	0.38058	0.646393
AC005165.1	7.06708	1.33438	1.58233e-12	1.74257e-11	0.0453106	AR2	0.15276	0.0303554	0.117729	0.0826682	0.0628766	0.0483581
STXBP6	32.4963	1.33421	1.2039e-231	7.6912e-230	0.300325	SVZCs	0.857313	0.352405	0.899448	0.456382	0.459125	0.840513
AC017101.1	11.9532	1.33415	6.24982e-33	7.38945e-32	0.0730524	ARPs	0.323313	0.0851583	0.202217	0.113398	0.14424	0.347107
CSGALNACT1	51.9528	1.33398	0	0	0.807833	SVZCs	2.2825	1.74548	2.48615	1.6807	2.16714	2.27492
GARNL3	36.4943	1.33329	1.36361e-291	1.11303e-289	0.362622	SVZCs	0.793435	0.578526	0.943537	0.48409	0.636017	0.589716
AL358154.1	7.27054	1.33219	3.58059e-13	2.23722e-12	0.0408685	ARPs	0.164115	0.0419187	0.102365	0.0530617	0.0430526	0.0835588
FSIP2	14.6641	1.33079	1.09447e-48	1.87585e-47	0.099106	ARPs	0.192695	0.121246	0.280841	0.190876	0.183666	0.384043
PDK4	31.6562	1.32975	6.22455e-220	5.85175e-218	0.289655	ARPs	1.24756	0.496794	0.962166	0.528973	1.53594	0.532923
TEF	16.4421	1.32966	9.55258e-61	3.57861e-59	0.113033	AR2	0.254962	0.177336	0.263246	0.186674	0.234603	0.113163
AL133227.1	10.4944	1.3296	9.16337e-26	8.83238e-25	0.0615581	ARPs	0.151714	0.0663743	0.159123	0.0808934	0.0886432	0.21089
PDGFC	31.4034	1.32932	1.81625e-216	1.68465e-214	0.315198	ARPs	0.74311	0.448461	0.8846	0.419911	0.66185	0.638455
MLLT3	35.8638	1.32884	1.11983e-281	1.47707e-279	0.47484	ARPs	1.46691	0.772021	1.36719	0.830149	1.13331	0.98392
PPM1K-DT	12.6703	1.32878	8.63974e-37	2.08134e-35	0.0945189	AR2	0.161628	0.140624	0.225369	0.153611	0.220282	0.0958874
LUCAT1	31.2065	1.32874	8.69309e-214	5.14613e-212	0.32082	SVZCs	1.03149	0.301163	0.855795	0.430968	0.241827	1.20623
ZNF454	7.41154	1.32844	1.24837e-13	9.22187e-13	0.038961	SVZCs	0.127937	0.0433916	0.0917867	0.0375647	0.0811233	0.11256
ANGPTL4	25.5866	1.32791	2.15106e-144	1.82001e-142	0.370672	AR1	0.525051	1.42264	1.0056	0.638571	1.16992	2.34648
ABCG1	10.6854	1.32721	1.19074e-26	1.17885e-25	0.0556833	ARPs	0.186675	0.0674788	0.161404	0.0571052	0.110464	0.210646
AC007262.2	27.34	1.3271	1.41935e-164	1.69201e-162	0.283557	AR2	1.15715	0.508389	0.778141	0.656244	0.710227	0.384774
LINC01359	7.95134	1.32697	1.84506e-15	1.89532e-14	0.0593541	AR1	0.0494371	0.0517856	0.119685	0.0718477	0.0956251	0.104301
SSPO	8.20953	1.32677	2.22059e-16	1.85665e-15	0.0377435	SVZCs	0.0649874	0.0619156	0.0972025	0.0398904	0.0485038	0.0754089
COLCA1	6.86833	1.32653	6.49558e-12	3.86239e-11	0.0326948	ARPs	0.0665168	0.0356833	0.087195	0.0462839	0.0493188	0.0660838
RABGAP1	40.3909	1.32652	0	0	0.574713	ARPs	1.6299	0.894607	1.53201	0.998491	1.14247	1.28833
AVIL	17.3256	1.32638	3.01392e-67	6.9702e-66	0.100852	SVZCs	0.236438	0.167033	0.257688	0.110836	0.235363	0.346335
OLFM2	20.0721	1.32612	1.2943e-89	2.85982e-87	0.379857	WMAs	0.994424	0.691465	1.00238	0.351702	0.523488	0.985471
FAM184A	45.857	1.32603	0	0	0.628044	SVZCs	1.93375	0.903278	1.69365	1.01909	0.994232	1.66973
NLGN4X	19.8151	1.32557	2.20533e-87	4.72239e-85	0.406027	WMAs	1.19958	0.42363	1.10903	0.212377	0.593615	1.25547
LFNG	18.2296	1.32513	3.0058e-74	7.50691e-73	0.107346	SVZCs	0.172347	0.170424	0.283465	0.122924	0.300023	0.305245
IFIT3	10.8799	1.32511	1.43712e-27	1.73284e-26	0.0570211	SVZCs	0.141373	0.0546684	0.147246	0.0613925	0.0835952	0.194392
PAPPA2	7.86446	1.32509	3.70694e-15	3.75128e-14	0.0663369	AR1	0.0775816	0.180378	0.184085	0.144242	0.129149	0.162906
LINC01833	15.4796	1.32439	4.76406e-54	9.14583e-53	0.0863346	ARPs	0.310858	0.107701	0.250581	0.206805	0.128224	0.274245
STXBP6	17.4912	1.32344	1.67158e-68	2.69707e-66	0.301348	WMAs	0.857313	0.352405	0.899448	0.456382	0.459125	0.840513
BCL2L14	18.3539	1.32343	3.07431e-75	8.5661e-74	0.137676	ARPs	0.381694	0.163893	0.368582	0.375482	0.218804	0.3966
IDH2	31.9339	1.32331	9.02664e-224	5.59168e-222	0.249797	SVZCs	0.437881	0.445936	0.620533	0.29538	0.648034	0.616598
OGDHL	11.1152	1.32306	1.05838e-28	1.31455e-27	0.0517451	SVZCs	0.145816	0.0884103	0.13311	0.0553454	0.135752	0.100937
ENOSF1	31.3736	1.32304	4.6397e-216	2.77024e-214	0.22707	SVZCs	0.388103	0.270843	0.623249	0.296932	0.525435	0.750982
BSG	34.1716	1.32271	6.38796e-256	4.60703e-254	0.283685	SVZCs	0.751445	0.482358	0.714706	0.348689	0.684004	0.524226
LGR4	42.9942	1.32228	0	0	0.610593	SVZCs	1.85211	0.997839	1.71422	1.03691	1.52395	1.7199
WNT5B	13.8126	1.32116	2.13842e-43	3.59756e-42	0.0801542	SVZCs	0.281697	0.061712	0.218976	0.0934658	0.172458	0.251763
KIF6	15.5167	1.321	2.67534e-54	9.01919e-53	0.111328	AR2	0.267047	0.419215	0.289802	0.585548	0.507561	0.126237
PKN2-AS1	17.472	1.32035	2.3433e-68	5.50673e-67	0.144886	SVZCs	0.254532	0.228234	0.413235	0.186399	0.329579	0.344433
CYB5A	14.0012	1.31908	1.53168e-44	2.39666e-43	0.0840358	ARPs	0.398112	0.0946004	0.221189	0.0958435	0.118663	0.592278
APBB2	29.3641	1.3187	1.57981e-189	8.47039e-188	0.210836	SVZCs	0.484582	0.334921	0.562372	0.264368	0.398464	0.447512
FAM66A	13.6616	1.31847	1.72086e-42	2.55551e-41	0.0822478	ARPs	0.236996	0.0901049	0.211199	0.129907	0.142841	0.202247
SAP30	15.1856	1.3182	4.40282e-52	8.12846e-51	0.0947637	ARPs	0.513945	0.104994	0.243767	0.179655	0.170948	0.206026
SUOX	7.95036	1.3177	1.85963e-15	1.27441e-14	0.0395913	ARPs	0.166589	0.0419644	0.1015	0.0637063	0.0700688	0.104532
BRINP3	37.987	1.31678	0	0	0.555664	AR2	1.61327	0.561944	1.5187	0.699727	1.23365	0.888559
AKAP7	33.3379	1.3166	1.08915e-243	1.16613e-241	0.347893	ARPs	0.968991	0.50617	0.971251	0.546655	0.670508	1.01383
PDE3B	11.2091	1.31628	3.68031e-29	3.90906e-28	0.0996169	ARPs	0.296794	0.141052	0.320075	0.0677676	0.231027	0.182555
COA6-AS1	7.38882	1.31615	1.48141e-13	9.39491e-13	0.0378033	ARPs	0.111781	0.0443647	0.107019	0.0644173	0.0566982	0.0766184
AC017083.1	9.06455	1.31614	1.25122e-19	9.94612e-19	0.0485313	ARPs	0.156341	0.0520495	0.1249	0.106278	0.128211	0.0544277
SHTN1	35.6675	1.31501	1.25967e-278	1.63052e-276	0.497829	ARPs	1.72151	0.831332	1.44112	1.35088	0.890996	1.53551
CDS1	24.6763	1.31259	1.92122e-134	7.60812e-133	0.168628	SVZCs	0.549441	0.129273	0.444249	0.203087	0.249885	0.358888
GRID1	40.6155	1.31231	0	0	0.626309	ARPs	1.72943	1.09196	1.7779	1.04899	1.55152	1.70082
SMC4	7.00621	1.31134	2.44854e-12	1.48005e-11	0.035249	ARPs	0.12715	0.0409334	0.0986616	0.0508579	0.0517771	0.077738
LINC00923	9.18715	1.31064	4.03396e-20	3.25664e-19	0.067433	ARPs	0.177057	0.101728	0.235562	0.113976	0.166215	0.194571
FGD4	43.0711	1.30982	0	0	0.590097	SVZCs	1.75564	0.989741	1.58529	0.942097	1.84938	1.17746
HPSE2	34.6621	1.30916	2.93988e-263	2.18851e-261	0.651177	SVZCs	2.90651	1.56144	2.64441	1.83682	3.54789	1.78088
C1orf61	41.1748	1.30863	0	0	0.724649	ARPs	2.17634	1.45821	2.21593	1.04192	1.98491	1.92233
AL157938.2	7.77838	1.30795	7.34579e-15	4.91561e-14	0.0510856	ARPs	0.177817	0.0568583	0.135278	0.0974836	0.0657141	0.241241
RGCC	12.211	1.30772	2.71583e-34	6.22685e-33	0.0789281	AR2	0.42709	0.120954	0.198632	0.218828	0.192445	0.0850426
PLIN5	33.1817	1.30705	1.97858e-241	2.08623e-239	0.314687	ARPs	1.04029	0.457395	0.88995	0.444133	1.04386	0.692982
AL354733.3	10.2521	1.30632	1.15838e-24	1.08284e-23	0.0630907	ARPs	0.189744	0.0733481	0.172452	0.137583	0.124247	0.378741
SLC35C2	23.0873	1.30524	6.20743e-118	2.86732e-116	0.180587	ARPs	0.375761	0.21141	0.458549	0.187869	0.25516	0.524033
SLC46A3	14.8372	1.3046	8.42118e-50	1.47914e-48	0.0850575	ARPs	0.193773	0.095581	0.221343	0.100828	0.172749	0.223747
OMG	10.6887	1.30456	1.14917e-26	7.13146e-25	0.157018	WMAs	0.465628	0.104503	0.351421	0.138045	0.157409	0.251692
P2RY14	15.7514	1.30371	6.7227e-56	8.54251e-54	0.301348	WMAs	1.00987	0.242757	0.778182	0.614209	0.390005	1.15527
SHC1	11.3778	1.3032	5.39451e-30	6.90282e-29	0.0616883	SVZCs	0.158015	0.133608	0.149564	0.063326	0.106652	0.432325
AC097460.1	8.23955	1.30281	1.72866e-16	1.45234e-15	0.0515422	SVZCs	0.0792338	0.0975033	0.147698	0.0625187	0.134722	0.105134
AC024145.1	9.13296	1.30209	6.66497e-20	3.1629e-18	0.127676	WMAs	0.328472	0.153434	0.311292	0.135218	0.138107	0.602387
AC007014.1	7.84412	1.3015	4.35985e-15	2.94764e-14	0.047765	ARPs	0.12534	0.0537443	0.127598	0.0591698	0.102504	0.218411
BOLA3	8.87862	1.30119	6.76951e-19	6.22903e-18	0.0489042	SVZCs	0.502428	0.0708897	0.121914	0.0512764	0.0833591	0.113198
MAOA	24.2308	1.30073	1.05345e-129	5.28861e-128	0.172414	ARPs	0.60706	0.235502	0.503303	0.208447	0.755667	0.422929
MYBPC1	25.9041	1.30072	5.9906e-148	6.11217e-146	0.255055	AR2	1.04372	0.373781	0.58335	0.509295	0.870813	0.27877
ARRB1	37.5219	1.3004	0	3.52622e-306	0.405844	SVZCs	1.10733	0.562735	1.00978	0.535611	0.966375	0.542768
ZFHX4	39.667	1.3	0	0	0.617625	ARPs	1.90233	1.08039	1.75634	0.994507	1.30063	1.43614
MTRNR2L8	10.5048	1.29964	8.20982e-26	9.50279e-25	0.0562094	SVZCs	0.142501	0.203615	0.159198	0.0677543	0.117693	0.117199
NOL4	32.8194	1.29947	3.10906e-236	3.18151e-234	0.401277	ARPs	1.18835	0.62604	1.14482	0.599078	0.773467	1.16922
CYB5A	14.9132	1.29934	2.70412e-50	5.09262e-49	0.0903003	SVZCs	0.398112	0.0946004	0.221189	0.0958435	0.118663	0.592278
PNMT	9.07323	1.29885	1.15543e-19	9.19097e-19	0.0467433	ARPs	0.222505	0.0545811	0.12929	0.0803097	0.163947	0.0887148
NTM-AS1	14.5174	1.29881	9.40424e-48	1.70446e-46	0.0947646	SVZCs	0.258561	0.057534	0.238893	0.104072	0.107074	0.282742
AL163541.1	11.1895	1.29852	4.58857e-29	7.32524e-28	0.103288	AR1	0.132908	0.119041	0.299841	0.0693004	0.107498	0.176412
AC095060.1	9.79298	1.29781	1.20685e-22	1.60712e-21	0.0925225	AR1	0.093548	0.0807438	0.215993	0.0726276	0.0601315	0.153743
CHST10	15.2745	1.29745	1.13036e-52	2.21039e-51	0.0821834	SVZCs	0.184556	0.10556	0.202632	0.0874486	0.103523	0.167789
LINC02656	7.94286	1.29692	1.97579e-15	2.02662e-14	0.0593541	AR1	0.050506	0.111903	0.11981	0.0783242	0.0990399	0.221772
CBR3	7.19165	1.29621	6.40118e-13	3.95542e-12	0.0372925	ARPs	0.0960797	0.0435612	0.103768	0.0365545	0.0716088	0.136922
TTPA	30.5116	1.29566	1.83008e-204	1.05283e-202	0.261364	SVZCs	0.715642	0.288154	0.639733	0.311135	0.515677	0.39247
MACROD2	34.4242	1.29519	1.09584e-259	8.03691e-258	0.451907	SVZCs	1.23668	0.962235	1.38563	0.798123	1.22199	1.31316
SLC9A6	20.174	1.29491	1.65809e-90	5.66133e-89	0.142784	ARPs	0.416013	0.172607	0.379981	0.211537	0.358333	0.232954
MT-CO2	35.3467	1.29447	1.12726e-273	8.59439e-272	0.510958	SVZCs	1.60754	1.88322	1.50416	0.886676	1.32014	0.980415
SESN3	35.5107	1.29437	3.36306e-276	4.30496e-274	0.469732	ARPs	1.63474	0.711237	1.26476	0.858251	0.964558	0.734779
FGFR3	36.7196	1.29206	3.55434e-295	4.9919e-293	0.511877	ARPs	0.995088	0.78495	1.36601	0.729892	1.17859	0.930208
LEPR	19.0345	1.29095	8.83133e-81	4.27279e-79	0.180755	AR2	0.524159	0.35971	0.470419	0.319578	0.4532	0.219521
CCDC88C	16.4759	1.29064	5.46261e-61	1.20011e-59	0.0886335	ARPs	0.245285	0.110416	0.251222	0.158432	0.158383	0.450237
KLKB1	24.9392	1.29039	2.79922e-137	1.54135e-135	0.197701	ARPs	0.517023	0.248451	0.524638	0.27329	0.381084	0.261238
PANK1	6.85736	1.28982	7.01447e-12	4.76374e-11	0.0342938	SVZCs	0.0478583	0.0695197	0.0867532	0.0363963	0.092673	0.0746529
PDE3A	32.5453	1.28961	2.44282e-232	2.4351e-230	0.446488	ARPs	1.28138	0.756567	1.32568	0.701613	0.713017	0.904034
AC125613.1	27.0606	1.28892	2.86976e-161	1.91815e-159	0.233461	ARPs	0.480473	0.325234	0.662249	0.367507	0.497451	0.567431
TTYH1	45.1304	1.2879	0	0	0.617492	SVZCs	1.39468	1.05409	1.50781	0.892122	1.24806	1.06706
AC002429.2	38.9355	1.28786	0	0	0.78514	AR2	2.17881	1.10855	2.38392	1.47299	1.3606	1.61603
AC097518.2	18.4727	1.28735	3.42663e-76	6.64076e-74	0.473434	WMAs	1.18161	0.170597	1.53105	0.442181	0.910018	0.754396
KLHL2	27.9314	1.28662	1.10943e-171	5.4513e-170	0.221185	SVZCs	0.556518	0.251068	0.565863	0.271497	0.572496	0.706284
MYO10	36.7308	1.28659	2.35753e-295	3.32451e-293	0.513155	ARPs	1.47081	0.831835	1.4268	0.762435	0.858476	1.05639
ADGRB3	69.9841	1.28592	0	0	0.964894	SVZCs	3.86217	2.5519	3.62676	2.77298	3.46796	3.06469
AL133538.1	8.01046	1.28429	1.14284e-15	9.27151e-15	0.0381494	SVZCs	0.0497478	0.0359173	0.102907	0.0435394	0.0607029	0.0964302
HKDC1	12.6753	1.28401	8.10148e-37	1.20206e-35	0.0645292	SVZCs	0.104213	0.0610772	0.170953	0.0737708	0.0954922	0.207115
LINC00158	9.41443	1.28345	4.75642e-21	4.72644e-20	0.0482955	SVZCs	0.12035	0.0630579	0.129506	0.0552467	0.0893758	0.0906047
MMADHC	11.1899	1.28262	4.56829e-29	4.84334e-28	0.0625798	ARPs	0.212018	0.066555	0.1548	0.104334	0.109294	0.156724
HS2ST1	39.6298	1.27998	0	0	0.530844	SVZCs	1.30393	0.852395	1.41242	0.823737	0.999387	1.44828
SUCLG2-AS1	32.6653	1.27985	4.86168e-234	4.87433e-232	0.422733	ARPs	1.3509	0.688203	1.22501	0.71221	1.0818	0.955344
ABHD2	34.529	1.27978	2.94956e-261	3.51616e-259	0.4	ARPs	1.22045	0.573592	1.05807	0.441897	0.947531	1.12587
ABCC8	17.5746	1.27962	3.85482e-69	9.15289e-68	0.100852	SVZCs	0.243941	0.252459	0.25609	0.113527	0.27843	0.322934
AC053513.1	34.2982	1.2778	8.33712e-258	6.10158e-256	0.426745	SVZCs	0.73696	0.843064	1.22349	0.687842	0.937421	0.907835
NT5DC1	28.2006	1.27612	5.74867e-175	4.21609e-173	0.277905	ARPs	0.678755	0.376579	0.745499	0.452911	0.665025	0.501947
SHE	8.37681	1.2759	5.43814e-17	4.66953e-16	0.0418019	SVZCs	0.112757	0.0225075	0.101868	0.043333	0.0466348	0.0861246
FAM153A	8.62577	1.27587	6.36619e-18	5.65974e-17	0.0422078	SVZCs	0.0746994	0.0426631	0.106401	0.0453212	0.0743585	0.101695
EHHADH	16.9561	1.27571	1.73566e-64	4.06551e-63	0.10728	ARPs	0.231083	0.128186	0.286028	0.132975	0.339428	0.271039
MGAM	13.3196	1.27565	1.78125e-40	2.84361e-39	0.083401	SVZCs	0.20138	0.173269	0.245383	0.108738	0.134406	0.133021
ARRB1	34.7754	1.27562	5.73296e-265	1.38109e-262	0.442875	AR2	1.10733	0.562735	1.00978	0.535611	0.966375	0.542768
FOXP2	13.6866	1.27518	1.22092e-42	2.02069e-41	0.0984172	SVZCs	0.552044	0.0923483	0.360371	0.164887	0.232002	0.250578
TOX	34.3997	1.2743	2.54737e-259	2.97536e-257	0.523883	ARPs	1.55797	0.946634	1.57164	1.02933	1.07197	0.974884
RMST	18.2409	1.27422	2.44289e-74	4.58074e-72	0.371134	WMAs	0.928944	0.473373	0.963322	0.871142	0.512791	0.595287
AC073475.1	32.1445	1.2738	1.05325e-226	1.03213e-224	0.490932	ARPs	0.883931	0.877835	1.48136	0.877947	1.28401	1.27731
AC073475.1	35.4635	1.27352	1.79458e-275	1.38036e-273	0.496347	SVZCs	0.883931	0.877835	1.48136	0.877947	1.28401	1.27731
SYNPO2	31.3253	1.27346	2.11234e-215	3.6097e-213	0.405603	AR2	1.44018	1.19017	1.08823	1.51889	0.888171	0.595818
FBXL14	11.1493	1.27299	7.2202e-29	7.60148e-28	0.0528736	ARPs	0.217017	0.0631397	0.146267	0.0798933	0.0902319	0.119903
AC092691.3	19.4633	1.27269	2.24664e-84	6.12704e-83	0.16112	SVZCs	0.422348	0.14967	0.397695	0.184102	0.226104	0.642894
SH3BGR	16.2803	1.27156	1.36233e-59	5.02223e-58	0.131547	AR2	1.11595	0.428923	0.293313	0.816928	0.320424	0.13207
GLDC	24.2764	1.2714	3.47789e-130	1.33756e-128	0.160511	SVZCs	0.46796	0.182691	0.417552	0.194485	0.272625	0.417644
LGI1	40.5711	1.27076	0	0	0.603167	AR2	1.98855	1.18246	1.52673	0.964788	1.2731	0.913595
AC137494.1	12.1946	1.26785	3.32072e-34	4.63564e-33	0.0817776	SVZCs	0.151144	0.0708622	0.202374	0.0890628	0.111775	0.304729
ATP1B2	35.9941	1.26784	1.03454e-283	1.37502e-281	0.548404	ARPs	1.31124	0.874896	1.47428	0.712728	1.02753	1.53726
AP000787.1	16.4321	1.26732	1.1277e-60	2.46037e-59	0.113921	ARPs	0.508246	0.136925	0.302493	0.234643	0.169407	0.387017
ST3GAL1	30.1668	1.26716	6.45361e-200	3.62845e-198	0.251015	SVZCs	0.578126	0.527657	0.628263	0.309889	0.455709	0.962569
AC125618.1	7.94494	1.26709	1.94287e-15	1.32988e-14	0.0413793	ARPs	0.12216	0.0459021	0.107104	0.0722893	0.0793739	0.076097
SGCD	23.0916	1.26704	5.62854e-118	3.67019e-116	0.329648	AR1	0.487365	1.0876	0.920857	1.39878	1.11559	0.641285
APOL3	7.86669	1.26656	3.6414e-15	2.47009e-14	0.0421456	ARPs	0.0764736	0.0473616	0.110367	0.0316881	0.0510297	0.170033
SCRN3	17.6844	1.26627	5.53392e-70	1.40948e-68	0.115964	ARPs	0.354484	0.128253	0.284543	0.182839	0.224253	0.249373
ZSCAN23	13.2292	1.26559	5.9534e-40	8.35451e-39	0.0725415	ARPs	0.284089	0.0785185	0.179307	0.120714	0.147499	0.138423
MED12L	44.3287	1.26363	0	0	0.796424	ARPs	2.6531	1.70351	2.46709	2.23466	2.05382	2.45817
CPEB3	40.3503	1.26204	0	0	0.613398	AR2	1.8513	0.813224	1.50936	0.74726	1.21978	0.903928
LINC01237	23.7841	1.26033	4.88005e-125	1.80864e-123	0.159903	SVZCs	0.380181	0.113609	0.405947	0.189816	0.226719	0.227603
AL512662.2	29.4219	1.25979	2.8809e-190	2.36261e-188	0.283014	ARPs	0.770569	0.387204	0.757206	0.740713	0.511084	0.69645
AL360091.3	12.5498	1.25964	3.9848e-36	5.11405e-35	0.0932312	ARPs	0.320447	0.105842	0.236905	0.189702	0.131707	0.282434
AC073475.1	31.205	1.25878	9.11927e-214	1.32919e-211	0.558336	AR1	0.883931	0.877835	1.48136	0.877947	1.28401	1.27731
LYPD6	23.5997	1.25863	3.88266e-123	1.85779e-121	0.185441	ARPs	0.62895	0.264672	0.545222	0.362533	0.503664	0.276569
DCHS1	7.09971	1.25843	1.25022e-12	7.64634e-12	0.0329502	ARPs	0.0911157	0.0379174	0.0884258	0.0191838	0.0374282	0.0644064
LINC01359	9.47529	1.2583	2.66029e-21	2.22536e-20	0.0462324	ARPs	0.0494371	0.0517856	0.119685	0.0718477	0.0956251	0.104301
AC211433.1	14.5665	1.25827	4.58884e-48	7.769e-47	0.100639	ARPs	0.313145	0.115386	0.256629	0.208134	0.139508	0.365203
SALL3	25.7347	1.25797	4.78212e-146	2.83576e-144	0.196679	ARPs	0.847651	0.245816	0.510695	0.356699	0.417312	0.333777
AC012358.3	15.8571	1.2575	1.25634e-56	2.53386e-55	0.101405	ARPs	0.273013	0.119298	0.264616	0.212321	0.168527	0.342367
TSPOAP1	24.8497	1.25645	2.60481e-136	1.42525e-134	0.181354	ARPs	0.516261	0.223703	0.46934	0.305886	0.332079	0.361354
TPCN1	37.738	1.25635	0	0	0.533496	AR2	1.22373	0.9572	1.22627	0.854513	1.37273	0.697236
TMEM47	27.1724	1.2562	1.3758e-162	1.5962e-160	0.297199	AR2	0.855863	0.455549	0.659628	0.689724	0.428617	0.330055
NTM-AS1	7.00902	1.25559	2.40001e-12	7.18345e-11	0.114195	WMAs	0.258561	0.057534	0.238893	0.104072	0.107074	0.282742
AC025442.2	8.81701	1.25523	1.17557e-18	9.05629e-18	0.0475096	ARPs	0.146855	0.0517324	0.119327	0.087243	0.0708228	0.0892446
MT-ND4	33.8482	1.25507	3.85189e-251	2.73255e-249	0.483563	SVZCs	1.60262	1.95544	1.43447	0.849996	1.35881	0.854797
AC097537.1	13.1999	1.25487	8.78424e-40	1.38197e-38	0.104302	SVZCs	0.21741	0.0503117	0.229249	0.102525	0.0837532	0.299314
XKR6	17.7292	1.25438	2.49649e-70	4.22455e-68	0.365583	WMAs	1.07786	0.261981	0.976132	0.398137	0.52673	1.00057
ASIC1	11.9257	1.25406	8.69943e-33	1.18115e-31	0.0657468	SVZCs	0.152524	0.109074	0.158366	0.069474	0.164291	0.0716695
GLCCI1	28.6788	1.25373	7.01298e-181	5.32342e-179	0.283014	ARPs	0.881206	0.405699	0.785328	0.509087	0.611699	0.477947
NT5E	21.498	1.25249	1.62597e-102	1.03117e-100	0.19123	AR2	0.484076	0.130135	0.421603	0.0803269	0.237957	0.198936
AMER2	32.2325	1.25207	6.18827e-228	3.87493e-226	0.318385	SVZCs	0.808293	0.34259	0.752696	0.386191	0.551721	0.498616
AHCYL2	43.0534	1.25165	0	0	0.804087	ARPs	2.93339	1.81221	2.58028	1.94347	2.25927	2.42419
NAPEPLD	25.0556	1.25141	1.51651e-138	8.47146e-137	0.201022	ARPs	0.544733	0.244286	0.506077	0.346776	0.36381	0.361304
GRAMD1B	37.7995	1.25074	0	0	0.437094	SVZCs	1.06244	0.59659	1.06879	0.589685	0.983877	0.751691
AL589740.1	39.3612	1.25015	0	0	0.77983	SVZCs	2.79317	1.38231	2.64663	1.87333	1.40439	2.39754
AC017083.1	8.53534	1.24995	1.39747e-17	1.92375e-16	0.0560292	AR2	0.156341	0.0520495	0.1249	0.106278	0.128211	0.0544277
AC087564.1	35.4758	1.24989	1.16277e-275	8.96365e-274	0.482143	SVZCs	1.03227	0.939859	1.37197	0.805369	1.23826	1.24703
AC110023.1	18.6792	1.24928	7.30708e-78	3.01048e-76	0.217341	AR1	0.297625	0.67042	0.601076	0.711877	0.666335	0.586633
NEDD4L	37.1762	1.24889	1.65199e-302	4.85658e-300	0.549086	AR2	1.71637	0.983345	1.34373	1.37615	1.05599	0.784894
MEIS1	30.1833	1.24876	3.92124e-200	2.20824e-198	0.267045	SVZCs	0.650615	0.368913	0.689771	0.349228	0.592291	0.438911
ZBTB34	13.8725	1.24864	9.29332e-44	1.57569e-42	0.0762987	SVZCs	0.215647	0.0716105	0.178559	0.0790628	0.145821	0.09557
GJA1	40.731	1.24857	0	0	0.721315	AR2	2.36596	1.19497	1.8019	1.74995	1.92512	1.14105
SOX5	59.1639	1.24838	0	0	0.948148	ARPs	3.62097	2.75209	3.57976	3.26044	3.48571	3.42777
ST7-AS2	12.7606	1.24746	2.72172e-37	3.59135e-36	0.0960409	ARPs	0.244743	0.112051	0.24804	0.255823	0.174277	0.326783
AC022509.2	7.57599	1.24739	3.56403e-14	2.31876e-13	0.038825	ARPs	0.0686587	0.0416445	0.0961794	0.0357024	0.0586342	0.106338
FOXG1	17.5335	1.24659	7.95364e-69	1.28931e-66	0.327518	WMAs	0.811734	0.455891	0.786774	0.621737	0.408242	0.743427
MT-ATP8	14.7907	1.24634	1.68186e-49	3.11832e-48	0.0868506	SVZCs	0.15893	0.257493	0.221638	0.0994705	0.162762	0.11061
SPARC	12.1958	1.24493	3.27271e-34	7.4888e-33	0.100853	AR2	0.529252	0.525661	0.248613	1.04237	0.937654	0.112514
ZNF883	13.1649	1.2447	1.39767e-39	1.94641e-38	0.0791826	ARPs	0.220202	0.0896445	0.200688	0.106484	0.142458	0.189993
MID1	32.8557	1.24342	9.43118e-237	9.67952e-235	0.426054	ARPs	1.46795	0.686458	1.20478	0.878437	1.01922	0.70997
MT-ND4	31.0426	1.24299	1.43762e-211	2.37481e-209	0.539099	AR2	1.60262	1.95544	1.43447	0.849996	1.35881	0.854797
AC068308.1	28.4151	1.24253	1.31448e-177	1.73382e-175	0.38246	AR2	1.24841	0.0625002	1.12481	0.0823496	0.161604	0.630698
COL5A3	19.6471	1.24247	6.12129e-86	1.2792e-83	0.503569	WMAs	1.41513	0.77997	1.24841	0.511626	0.717933	0.940195
LINC02328	15.2859	1.24234	9.48746e-53	1.11946e-50	0.249009	WMAs	0.457799	0.28639	0.704253	0.30567	0.359162	0.485503
CARMIL1	52.8084	1.24157	0	0	0.836445	SVZCs	2.62226	1.4854	2.45837	1.70823	2.15185	2.18005
KIAA0319	37.0928	1.24126	3.66675e-301	3.13299e-299	0.454951	SVZCs	1.31605	0.479185	1.18955	0.676414	0.91298	0.855436
PLIN1	8.30823	1.24115	9.71392e-17	1.29407e-15	0.0560292	AR2	0.110977	0.124651	0.118993	0.120191	0.189115	0.0520757
AC079760.1	13.5266	1.24094	1.08927e-41	2.34993e-40	0.148094	AR1	0.171509	0.134317	0.366173	0.105664	0.142696	0.273164
MINPP1	14.517	1.24093	9.45703e-48	1.58946e-46	0.0922095	ARPs	0.329343	0.0999766	0.221951	0.152389	0.173147	0.230801
CYFIP2	39.9909	1.2402	0	0	0.511769	SVZCs	1.43124	0.728296	1.22521	0.702113	0.971739	0.945187
LINC02024	11.7079	1.23971	1.16053e-31	1.53602e-30	0.0580357	SVZCs	0.114288	0.0797129	0.132071	0.0580686	0.113397	0.141679
RIMS1	7.14871	1.23953	8.75997e-13	2.71325e-11	0.103886	WMAs	0.289823	0.213072	0.310068	0.225514	0.143194	0.261351
TSPAN15	8.34451	1.23895	7.15111e-17	6.11618e-16	0.0405844	SVZCs	0.103555	0.0610308	0.101436	0.0442387	0.0424455	0.121642
AL158064.1	16.4913	1.23861	4.23659e-61	9.19696e-60	0.119318	SVZCs	0.22959	0.163973	0.295588	0.136055	0.201657	0.350741
MT-CO1	33.3431	1.2386	9.16229e-244	6.23216e-242	0.434253	SVZCs	1.06599	1.7582	1.25758	0.725912	1.0794	1.01144
ARHGAP5-AS1	7.78878	1.23858	6.76569e-15	4.53311e-14	0.0436782	ARPs	0.216303	0.0470986	0.107774	0.0962448	0.0588849	0.0683355
AC105383.1	29.657	1.237	2.75299e-193	1.51109e-191	0.282062	SVZCs	0.633501	0.271599	0.702044	0.358958	0.627187	0.524692
TNS3	30.0664	1.23678	1.33125e-198	1.16033e-196	0.288123	ARPs	0.786135	0.419529	0.801296	0.603914	0.759775	0.433389
ORMDL1	21.2562	1.23595	2.89132e-100	1.12697e-98	0.16143	ARPs	0.41184	0.186156	0.393346	0.215303	0.291372	0.429356
MT-ATP6	31.2627	1.2356	1.50195e-214	2.52925e-212	0.580999	AR2	1.89779	1.8445	1.58979	0.89454	1.38937	0.977328
FAM234B	13.0454	1.23481	6.75383e-39	1.0399e-37	0.0787338	SVZCs	0.203521	0.100065	0.183177	0.0819634	0.167575	0.176283
CYB5B	29.0228	1.23446	3.38843e-185	2.65337e-183	0.307535	ARPs	0.94406	0.403457	0.774443	0.404327	0.561093	0.969508
IDI2-AS1	7.87173	1.23442	3.49776e-15	4.35368e-14	0.0552984	AR2	0.196879	0.0767165	0.121143	0.0486854	0.113536	0.0532906
ALDH1A1	28.3491	1.23395	8.58471e-177	4.29731e-175	0.329951	SVZCs	0.669784	1.16827	1.05915	0.588312	1.22048	0.916097
FGD6	34.1367	1.23351	2.10794e-255	2.36649e-253	0.439847	ARPs	1.26519	0.646984	1.14398	0.898664	0.679699	0.85496
LINC00461	43.1684	1.2331	0	0	0.762708	ARPs	2.09077	1.51355	2.23304	1.6477	1.96351	1.78485
AC093157.1	25.0545	1.23286	1.5604e-138	6.33845e-137	0.20211	SVZCs	0.639777	0.223214	0.498399	0.24286	0.488326	0.340108
ZBTB20-AS1	12.4865	1.23256	8.84687e-36	1.12706e-34	0.0796935	ARPs	0.315575	0.0931497	0.20653	0.196863	0.129615	0.271891
SELENBP1	9.15291	1.23246	5.54214e-20	2.64452e-18	0.1364	WMAs	0.31074	0.111709	0.275084	0.134734	0.126421	0.201104
AGMO	6.92236	1.23197	4.44195e-12	4.79437e-11	0.0579781	AR2	0.0999799	0.127925	0.163378	0.0658144	0.409023	0.0728417
SCARA3	34.101	1.23153	7.13909e-255	5.13807e-253	0.357752	SVZCs	0.815893	0.748339	0.902178	0.484817	0.656785	1.45121
RORA-AS1	23.716	1.23135	2.4648e-124	1.19086e-122	0.220945	ARPs	0.756832	0.280755	0.565891	0.489515	0.406532	0.752228
SLC48A1	24.2076	1.23107	1.84843e-129	7.05412e-128	0.182224	SVZCs	0.405614	0.289112	0.421585	0.201621	0.29728	0.397692
MGLL	38.6905	1.2309	0	0	0.522524	SVZCs	1.41592	0.888144	1.3275	0.779715	0.779993	1.27052
CNTFR	25.6389	1.23076	5.62444e-145	5.63907e-143	0.257491	AR2	0.827723	0.351029	0.568338	0.381199	0.602696	0.282243
CYB5B	31.692	1.23068	2.00209e-220	1.22061e-218	0.33543	SVZCs	0.94406	0.403457	0.774443	0.404327	0.561093	0.969508
NDUFA12	16.0581	1.23017	5.01978e-58	1.04148e-56	0.11341	ARPs	0.943855	0.130598	0.283133	0.173869	0.20263	0.244018
MGLL	21.5266	1.23016	8.76908e-103	2.28721e-100	0.555115	WMAs	1.41592	0.888144	1.3275	0.779715	0.779993	1.27052
AL365259.1	12.907	1.2295	4.11214e-38	1.0182e-36	0.116443	AR2	0.0796388	0.163565	0.280403	0.294639	0.204693	0.1293
CTNNBIP1	21.1047	1.22945	7.20519e-99	2.22374e-97	0.134334	SVZCs	0.282353	0.239748	0.329544	0.153982	0.293399	0.223681
AL445259.1	26.1245	1.22945	1.91898e-150	1.98714e-148	0.297686	AR2	1.11848	0.149531	0.726084	0.244711	0.455353	0.375035
MTMR10	33.3169	1.22918	2.19791e-243	1.48627e-241	0.343547	SVZCs	0.832817	0.3678	0.798854	0.419814	0.617097	0.637201
AC124854.1	21.2385	1.22896	4.2143e-100	1.63895e-98	0.182631	ARPs	0.475106	0.289088	0.579822	0.300081	0.711838	0.226475
AL160272.1	35.9435	1.22877	6.39902e-283	5.07968e-281	0.475446	SVZCs	1.42119	1.14126	1.37931	0.818973	1.79367	1.03381
GRAMD1B	33.2568	1.22848	1.62582e-242	1.73006e-240	0.403831	ARPs	1.06244	0.59659	1.06879	0.589685	0.983877	0.751691
POU6F2	16.1608	1.22846	9.53777e-59	2.00646e-57	0.12848	ARPs	0.34869	0.200083	0.418066	0.203604	0.512694	0.157459
SESN3	36.9418	1.22838	9.86856e-299	2.71699e-296	0.548599	AR2	1.63474	0.711237	1.26476	0.858251	0.964558	0.734779
AC004470.1	9.65184	1.22812	4.8283e-22	4.15927e-21	0.0664112	ARPs	0.238696	0.080887	0.18012	0.170266	0.162717	0.31117
PDE5A	23.1668	1.22782	9.83376e-119	4.57897e-117	0.218391	ARPs	0.626577	0.287398	0.576514	0.418102	0.326668	0.778144
AL391807.1	29.6497	1.22747	3.42403e-193	2.86216e-191	0.290421	ARPs	0.710284	0.377277	0.729073	0.585204	0.578575	0.646526
PLCG2	34.3425	1.22709	1.82395e-258	2.09513e-256	0.7106	ARPs	3.57539	1.50418	2.21859	1.96855	1.97373	1.63696
ATP13A5	22.3761	1.22641	6.72606e-111	2.23066e-109	0.173295	SVZCs	0.504072	0.237362	0.44515	0.214822	0.387623	0.27616
CASKIN2	11.467	1.22628	1.93227e-30	2.49648e-29	0.0610795	SVZCs	0.145887	0.075941	0.145935	0.0649978	0.102914	0.108888
PDE9A	26.2191	1.22561	1.60895e-151	1.68624e-149	0.282339	AR2	0.597309	0.464591	0.608607	0.513196	0.506705	0.306224
AC024257.3	12.6996	1.22457	5.94511e-37	7.7972e-36	0.067433	ARPs	0.105649	0.080401	0.178687	0.110266	0.114336	0.181967
AC007325.2	7.80113	1.22455	6.13532e-15	6.13532e-14	0.0637184	AR1	0.0522032	0.0724088	0.117988	0.054141	0.105513	0.0588044
WASF3	34.246	1.22423	4.99891e-257	5.68565e-255	0.479183	ARPs	1.55158	0.728153	1.25356	0.932145	0.96202	0.936521
F11-AS1	28.0422	1.22395	4.97791e-173	6.34866e-171	0.352984	AR2	0.702264	0.339682	0.961186	0.219017	0.556843	0.525504
NRSN1	11.3192	1.22381	1.05409e-29	1.71834e-28	0.126564	AR1	0.130306	0.0475907	0.281461	0.0590002	0.282534	0.0729802
SPI1	9.12615	1.22366	7.09752e-20	6.75852e-19	0.0531656	SVZCs	0.1248	0.0547439	0.123431	0.0547276	0.107545	0.119331
SLC46A3	15.6625	1.22365	2.73163e-55	5.53507e-54	0.0913149	SVZCs	0.193773	0.095581	0.221343	0.100828	0.172749	0.223747
SPI1	8.45187	1.22322	2.86668e-17	2.098e-16	0.0508301	ARPs	0.1248	0.0547439	0.123431	0.0547276	0.107545	0.119331
LINC00391	19.6921	1.22295	2.52237e-86	8.20835e-85	0.130013	ARPs	0.320297	0.155747	0.33174	0.248684	0.239935	0.245248
SIX3	12.2452	1.22274	1.78252e-34	2.19587e-33	0.0692209	ARPs	0.229063	0.0826569	0.183245	0.164991	0.129579	0.197558
SPECC1	34.5992	1.22273	2.59459e-262	3.12523e-260	0.499106	ARPs	1.47636	0.76037	1.29704	1.04988	1.05016	1.16103
CCNG2	15.097	1.22232	1.69562e-51	3.08772e-50	0.0957854	ARPs	0.319899	0.110915	0.241916	0.130838	0.173235	0.128081
BICC1	26.5503	1.22229	2.55023e-155	1.63526e-153	0.286845	ARPs	0.849258	0.444978	0.836223	0.482353	0.617037	0.52653
GPR37L1	31.6159	1.2209	2.23345e-219	1.35215e-217	0.328734	SVZCs	0.810782	0.408956	0.760907	0.39822	0.624188	0.488282
CGNL1	31.3013	1.22079	4.47631e-215	4.12987e-213	0.361941	ARPs	1.00608	0.518079	0.948604	0.660674	0.925999	0.801762
CDH4	21.6591	1.22067	4.98363e-104	1.31971e-101	0.600317	WMAs	1.76531	1.39378	1.58704	1.3279	0.981636	1.32965
COL21A1	7.85106	1.2201	4.12528e-15	5.11458e-14	0.0638246	AR2	0.219824	0.998306	0.181005	1.72224	0.978119	0.0817395
ENOX1	31.9092	1.2201	1.99085e-223	1.90781e-221	0.456194	ARPs	1.04623	0.793817	1.34106	0.415841	1.29059	1.48695
AC079950.1	7.07292	1.21999	1.5171e-12	1.06881e-11	0.041599	SVZCs	0.050703	0.104532	0.109746	0.0485949	0.111407	0.0540098
CSGALNACT1	40.8259	1.21996	0	0	0.792593	ARPs	2.2825	1.74548	2.48615	1.6807	2.16714	2.27492
EPS8	32.2116	1.21996	1.2144e-227	1.20021e-225	0.428097	ARPs	1.3854	0.646753	1.13726	0.844495	1.01974	1.06781
SLC25A5	9.85892	1.21995	6.27179e-23	6.64128e-22	0.0541802	SVZCs	0.223914	0.0651616	0.139516	0.0622922	0.066956	0.135133
CYP4V2	33.1921	1.21968	1.39828e-241	9.38226e-240	0.350446	SVZCs	0.852549	0.437782	0.808307	0.428003	0.691037	0.601242
AL139807.1	14.7806	1.21966	1.95387e-49	3.61878e-48	0.0840097	SVZCs	0.187763	0.108001	0.230143	0.105365	0.127916	0.323858
EHHADH	18.2322	1.21926	2.86581e-74	7.16247e-73	0.111201	SVZCs	0.231083	0.128186	0.286028	0.132975	0.339428	0.271039
MYO10	22.9945	1.21922	5.29402e-117	1.76586e-114	0.602696	WMAs	1.47081	0.831835	1.4268	0.762435	0.858476	1.05639
MTRNR2L12	24.1386	1.21895	9.84444e-129	3.74046e-127	0.180804	SVZCs	0.583969	0.716679	0.496499	0.243897	0.385953	0.214064
GSTM5	7.34884	1.21796	1.99933e-13	6.45179e-12	0.111023	WMAs	0.446242	0.140528	0.224868	0.246024	0.102917	0.0892665
PCDH10	31.3987	1.21796	2.109e-216	1.2614e-214	0.323864	SVZCs	0.808931	0.329846	0.767794	0.403146	0.563486	0.536347
SFTPD-AS1	6.86767	1.217	6.52587e-12	3.87973e-11	0.0393359	ARPs	0.0650539	0.0437222	0.0988424	0.113782	0.0628147	0.0820858
ZFPM2	31.7302	1.21628	5.95896e-221	5.6326e-219	0.461558	ARPs	1.30932	0.766182	1.3017	0.799226	1.44839	0.905489
C3orf70	32.8166	1.2162	3.41361e-236	2.23009e-234	0.359781	SVZCs	0.939675	0.592062	0.929747	0.506937	0.74193	1.11396
GASK1B	20.7549	1.21595	1.10634e-95	6.4394e-94	0.194153	AR2	0.45849	0.391968	0.431682	0.453124	0.459591	0.208961
AL158840.1	17.7071	1.21558	3.69681e-70	1.56393e-68	0.161754	AR2	0.246031	0.0952796	0.362792	0.0732845	0.391215	0.172539
DIO2	9.9753	1.21509	1.95509e-23	2.66178e-22	0.113471	AR1	0.114076	0.0604178	0.247276	0.0194986	0.145457	0.236259
AC098829.1	23.2622	1.21458	1.06966e-119	3.81754e-118	0.253247	SVZCs	0.490697	0.574285	0.680349	0.350614	0.569559	0.892231
EYA1	32.6166	1.21437	2.38911e-233	4.4799e-231	0.502314	AR2	1.36378	0.820836	1.26115	1.02268	1.62216	0.737215
PDK4	33.8032	1.21402	1.76956e-250	1.24515e-248	0.317776	SVZCs	1.24756	0.496794	0.962166	0.528973	1.53594	0.532923
PLAGL1	21.314	1.21386	8.41346e-101	3.31286e-99	0.168838	ARPs	0.322998	0.217797	0.447524	0.160533	0.128789	0.553145
MB21D2	7.95253	1.21382	1.82739e-15	2.30768e-14	0.0550548	AR2	0.126014	0.0672264	0.138509	0.0997554	0.161325	0.0620809
AC005520.2	7.27393	1.21305	3.4917e-13	3.22919e-12	0.0578993	AR1	0.0550973	0.0646659	0.123381	0.0646903	0.0861178	0.0898794
APOE	35.3855	1.21232	2.85645e-274	2.18261e-272	0.674716	SVZCs	2.82555	1.72975	1.98777	1.31334	1.88031	1.94687
AL161772.1	9.28797	1.21138	1.57263e-20	1.28424e-19	0.0533844	ARPs	0.210353	0.0599035	0.133613	0.114251	0.0718258	0.0812493
SUCLG2-AS1	34.548	1.21106	1.5267e-261	1.12924e-259	0.448661	SVZCs	1.3509	0.688203	1.22501	0.71221	1.0818	0.955344
PRSS23	15.9924	1.21076	1.44284e-57	3.00975e-56	0.112825	SVZCs	0.119826	0.250302	0.288937	0.135175	0.223717	0.587606
DPH6-DT	30.1183	1.21067	2.79303e-199	4.12299e-197	0.446041	AR2	1.5882	1.17832	1.19419	1.46139	1.32701	0.690208
AIFM3	18.941	1.20986	5.23844e-80	1.37877e-78	0.118101	SVZCs	0.221993	0.145662	0.286427	0.133989	0.180023	0.263522
MAF	11.7451	1.20984	7.48539e-32	1.60785e-30	0.0898904	AR2	0.338072	0.236875	0.18926	0.382319	0.230104	0.0862468
CHKA	40.4289	1.20956	0	0	0.557427	SVZCs	1.37589	0.727864	1.34124	0.797964	1.00724	1.09399
AC007193.2	15.4493	1.20938	7.63003e-54	1.45752e-52	0.123372	ARPs	0.276432	0.14038	0.298994	0.180291	0.250823	0.28473
SPARCL1	43.1551	1.20901	0	0	0.871264	ARPs	3.30065	2.2931	3.07214	2.12459	2.57079	2.77438
TUB	16.3202	1.20892	7.08953e-60	2.62471e-58	0.142022	AR2	0.361124	0.225784	0.302425	0.279124	0.424372	0.142163
KLKB1	23.411	1.20837	3.30194e-121	2.57403e-119	0.227527	AR2	0.517023	0.248451	0.524638	0.27329	0.381084	0.261238
TOX	36.0906	1.20829	3.18733e-285	8.3764e-283	0.602923	AR2	1.55797	0.946634	1.57164	1.02933	1.07197	0.974884
LDLRAD3	33.8305	1.208	7.02858e-251	4.96581e-249	0.376826	SVZCs	1.09405	0.685987	0.994963	0.552664	1.08635	1.15991
RUNX1T1	29.2553	1.2079	3.84514e-188	3.10204e-186	0.344828	ARPs	0.870947	0.529962	0.961032	0.731501	1.055	0.819947
ARRB1	31.7717	1.20778	1.5908e-221	1.51191e-219	0.375734	ARPs	1.10733	0.562735	1.00978	0.535611	0.966375	0.542768
RAB11FIP2	30.6825	1.20769	9.73021e-207	8.7673e-205	0.375223	ARPs	1.06696	0.512083	0.933985	0.604676	0.588558	0.881984
ASIC1	10.2299	1.20757	1.45632e-24	2.53358e-23	0.0745432	AR2	0.152524	0.109074	0.158366	0.069474	0.164291	0.0716695
ASAP2	35.0501	1.20756	3.88281e-269	4.89798e-267	0.522605	ARPs	1.42349	0.80928	1.35539	0.810779	0.991629	1.22612
ACSS1	34.2044	1.20737	2.08083e-256	2.35896e-254	0.499106	ARPs	1.16111	0.795406	1.33669	0.686806	1.11154	0.994105
ITSN1	45.5484	1.20712	0	0	0.710024	SVZCs	1.89582	1.28694	1.83402	1.18718	1.50661	1.83961
HS2ST1	33.7283	1.20711	2.22454e-249	2.42671e-247	0.525926	ARPs	1.30393	0.852395	1.41242	0.823737	0.999387	1.44828
UQCR10	8.66422	1.20672	4.54626e-18	1.97631e-16	0.158604	WMAs	0.746465	0.206578	0.332743	0.171791	0.157895	0.393887
FN1	11.6906	1.20635	1.42339e-31	1.0202e-29	0.203013	WMAs	0.48681	0.344469	0.482167	0.308593	0.237838	1.27783
EFR3A	31.1886	1.20591	1.52081e-213	1.392e-211	0.387229	ARPs	1.27097	0.535483	0.96845	0.639637	0.791276	0.933479
AC091885.2	10.9036	1.2052	1.10737e-27	1.33709e-26	0.0838068	SVZCs	0.336432	0.0255078	0.195866	0.0896933	0.100077	0.146224
ARHGAP22	7.80904	1.20502	5.76238e-15	4.52973e-14	0.0458604	SVZCs	0.055125	0.133664	0.116163	0.0520518	0.134964	0.184143
TNC	9.57117	1.205	1.05708e-21	1.36472e-20	0.0913587	AR1	0.136977	2.0549	0.291499	1.89741	1.94145	0.496436
ZBTB43	27.2331	1.20488	2.6329e-163	1.24266e-161	0.23681	SVZCs	0.591814	0.267099	0.531281	0.265548	0.457244	0.546655
PHLPP1	50.1547	1.20479	0	0	0.800933	SVZCs	2.26936	1.32463	2.23816	1.53338	2.00342	1.56753
AC093879.1	22.9797	1.20377	7.43786e-117	3.39946e-115	0.225287	ARPs	0.960481	0.303541	0.597131	0.695443	0.39782	0.739431
ASAP2	39.6596	1.20367	0	0	0.556209	SVZCs	1.42349	0.80928	1.35539	0.810779	0.991629	1.22612
KCTD8	31.7816	1.20365	1.16131e-221	7.13024e-220	0.377841	SVZCs	1.21327	0.675736	1.13014	0.647136	1.15901	1.16471
ARHGEF37	7.67975	1.20313	1.594e-14	1.93072e-13	0.0518879	AR2	0.119854	0.0775492	0.112133	0.114615	0.135848	0.0502541
MAPK4	40.5683	1.20309	0	0	0.706981	SVZCs	2.40861	2.09289	2.02428	1.34909	2.26098	2.66417
AC083843.3	9.91394	1.20301	3.62072e-23	3.23136e-22	0.0487867	ARPs	0.148568	0.0548883	0.122126	0.0447269	0.122099	0.111628
AP003025.2	10.2317	1.20293	1.43025e-24	8.20091e-23	0.156225	WMAs	0.342285	0.117141	0.362801	0.188015	0.173937	0.441247
FAM227B	25.8038	1.20264	8.04757e-147	4.805e-145	0.246488	ARPs	0.516287	0.329912	0.641628	0.445333	0.428674	0.435404
SMIM20	6.99032	1.20176	2.74251e-12	8.1874e-11	0.0911975	WMAs	0.499812	0.0669629	0.192603	0.0668475	0.0883226	0.241363
FEZF1-AS1	9.95384	1.20173	2.4264e-23	2.18005e-22	0.0607918	ARPs	0.176463	0.0657924	0.14533	0.0700607	0.104354	0.160081
PDE4A	7.0318	1.20158	2.03887e-12	1.23565e-11	0.0360153	ARPs	0.105815	0.0420558	0.0942071	0.0633666	0.0400867	0.068153
STEAP2-AS1	8.55754	1.20137	1.15298e-17	1.29649e-16	0.0878673	AR1	0.104775	0.128103	0.226348	0.154317	0.29514	0.141402
MYOM1	22.6994	1.20126	4.53981e-114	3.24713e-112	0.248721	AR2	0.566853	0.547323	0.57023	0.680441	0.901218	0.288401
POU6F2	17.238	1.20067	1.37648e-66	3.1539e-65	0.135349	SVZCs	0.34869	0.200083	0.418066	0.203604	0.512694	0.157459
GPD2	35.459	1.20031	2.10672e-275	1.61686e-273	0.456372	SVZCs	1.16196	0.760894	1.15722	0.667402	1.07169	1.13697
DAB1	17.2252	1.20022	1.71893e-66	5.8289e-65	0.21094	AR1	0.256712	0.451054	0.514313	0.410805	0.44949	0.467917
PDK4	29.0131	1.20019	4.49742e-185	6.26568e-183	0.3676	AR2	1.24756	0.496794	0.962166	0.528973	1.53594	0.532923
AC117834.1	6.84302	1.19997	7.754e-12	4.59177e-11	0.0490421	ARPs	0.125809	0.0563514	0.125024	0.10495	0.0598906	0.140232
EED	20.1148	1.19937	5.4778e-90	1.85571e-88	0.141507	ARPs	0.500449	0.164156	0.343357	0.247151	0.218476	0.247221
FGD4	34.1677	1.19883	7.29538e-256	8.21677e-254	0.563985	ARPs	1.75564	0.989741	1.58529	0.942097	1.84938	1.17746
FZD7	7.40509	1.19811	1.31066e-13	8.32418e-13	0.0418902	ARPs	0.168964	0.0466243	0.103916	0.0888541	0.026686	0.10574
ZMAT3	29.5958	1.19791	1.69098e-192	9.2233e-191	0.286932	SVZCs	0.706298	0.447957	0.70747	0.370516	0.6248	0.502789
PDK2	15.3795	1.19788	2.24739e-53	4.43722e-52	0.0925325	SVZCs	0.254505	0.115933	0.210317	0.0971577	0.142018	0.159741
SGO2	8.19065	1.19745	2.59812e-16	1.84275e-15	0.0500639	ARPs	0.117897	0.056098	0.124277	0.0944849	0.105096	0.0826189
HEPN1	16.0809	1.19716	3.4736e-58	4.58172e-56	0.375892	WMAs	1.09635	0.338975	0.856448	0.544639	0.464279	0.864467
GMNN	16.8837	1.19669	5.92914e-64	2.32935e-62	0.16078	AR2	0.538242	0.145726	0.35527	0.225492	0.508331	0.170671
ZBTB43	25.0819	1.19531	7.84264e-139	4.41658e-137	0.222478	ARPs	0.591814	0.267099	0.531281	0.265548	0.457244	0.546655
INHBB	10.7031	1.19516	9.84348e-27	1.16622e-25	0.0556006	SVZCs	0.10778	0.0661217	0.137948	0.0625994	0.0874655	0.0828506
NDUFB3	11.0265	1.19441	2.84794e-28	2.94999e-27	0.0720307	ARPs	0.811642	0.0850132	0.184871	0.0943476	0.122392	0.196601
DIPK2A	23.2324	1.1937	2.1441e-119	1.00376e-117	0.201533	ARPs	0.349378	0.258597	0.515835	0.287956	0.356852	0.366384
AC027117.1	15.7603	1.19366	5.83302e-56	1.16292e-54	0.101405	ARPs	0.157133	0.111837	0.239536	0.115768	0.187654	0.149615
AL024508.1	7.87676	1.19363	3.35982e-15	2.28086e-14	0.0503193	ARPs	0.121907	0.0556577	0.123026	0.0879809	0.0704857	0.200883
P2RY1	20.6254	1.1936	1.62255e-94	5.84489e-93	0.159387	ARPs	0.355466	0.190271	0.391605	0.2716	0.220202	0.204995
PDE7B	41.6352	1.19302	0	0	0.702922	SVZCs	2.09492	1.21336	2.03543	1.3638	2.06383	1.67367
FGFR2	33.511	1.19251	3.33482e-246	3.60389e-244	0.528736	ARPs	1.22445	0.870452	1.42845	0.902575	0.787458	1.75537
PPM1B	32.0625	1.19222	1.47098e-225	1.42537e-223	0.413793	ARPs	1.39826	0.572735	1.01761	0.725078	0.992364	0.885103
ADGRG1	32.3787	1.19171	5.48021e-230	3.48184e-228	0.331778	SVZCs	0.588798	0.68279	0.800079	0.429571	0.550008	0.895732
AC025159.1	24.2575	1.19084	5.50838e-130	2.11612e-128	0.237216	SVZCs	0.367189	0.44289	0.665032	0.346253	0.50958	0.460558
IDH2-DT	25.7291	1.19026	5.53024e-146	2.35681e-144	0.202516	SVZCs	0.634906	0.464309	0.498247	0.249216	0.556691	0.502704
PHF21B	41.1278	1.18996	0	0	0.60836	SVZCs	1.73979	0.952159	1.50126	0.927647	1.42682	1.17363
COMMD6	14.2033	1.18995	8.73499e-46	1.40481e-44	0.101149	ARPs	0.887281	0.117226	0.249787	0.145572	0.149657	0.206443
ATP10D	28.0355	1.18968	6.00833e-173	4.3153e-171	0.291443	ARPs	0.970493	0.376265	0.713953	0.46054	0.601765	0.612182
MT-ND2	30.5056	1.18934	2.19589e-204	1.26118e-202	0.371144	SVZCs	1.17419	1.2717	1.00467	0.564774	0.812402	0.659163
FAM13A	31.5043	1.18874	7.58708e-218	1.32259e-215	0.426309	AR2	1.52802	0.7416	0.979322	1.08181	1.03365	0.547765
RNF217-AS1	12.7872	1.18833	1.93258e-37	2.90599e-36	0.0870536	SVZCs	0.0883334	0.153414	0.250116	0.117515	0.18912	0.255837
PIK3IP1	19.5088	1.18753	9.24917e-85	2.53439e-83	0.129667	SVZCs	0.261052	0.144211	0.302499	0.144178	0.225333	0.286032
CNTNAP3	15.2062	1.18746	3.21549e-52	3.73062e-50	0.313243	WMAs	0.767792	0.472207	0.700708	0.32435	0.368622	0.774974
SMURF2	30.1494	1.18736	1.09366e-199	9.55644e-198	0.367816	ARPs	0.819757	0.512865	0.926629	0.525486	0.55606	1.24807
PIK3IP1	18.1674	1.18717	9.35448e-74	2.54915e-72	0.122605	ARPs	0.261052	0.144211	0.302499	0.144178	0.225333	0.286032
ZNF730	12.8442	1.18693	9.26841e-38	1.23757e-36	0.0807152	ARPs	0.120331	0.0934485	0.201315	0.115154	0.182001	0.19873
PREX2	31.7514	1.1866	3.03375e-221	3.39486e-218	0.925456	WMAs	2.89363	1.72139	2.88996	1.98324	2.136	2.69141
TMEM220-AS1	15.995	1.18627	1.38546e-57	4.08687e-56	0.176898	AR1	0.178334	0.335349	0.367597	0.354133	0.364747	0.455345
LYPD6	21.741	1.18623	8.39842e-105	5.48665e-103	0.228015	AR2	0.62895	0.264672	0.545222	0.362533	0.503664	0.276569
SNRK	25.3592	1.1859	7.1068e-142	4.08847e-140	0.226054	ARPs	0.523394	0.284549	0.558965	0.322592	0.477679	0.396605
SLC1A3	34.1036	1.18539	6.5186e-255	9.83175e-252	0.976209	WMAs	3.48194	2.47547	3.52458	2.29684	2.73979	4.21872
C12orf60	11.9	1.18519	1.18299e-32	1.59681e-31	0.0777192	SVZCs	0.130388	0.109738	0.198813	0.0923317	0.132902	0.169017
TSC22D3	8.43428	1.18506	3.33249e-17	4.52463e-16	0.0584653	AR2	0.366952	0.105662	0.132719	0.100561	0.385854	0.0605507
FH	8.2275	1.1849	1.91155e-16	1.36192e-15	0.0416347	ARPs	0.123541	0.0479077	0.105772	0.0537007	0.0731775	0.106594
CIRBP	34.8901	1.18448	1.05075e-266	7.87271e-265	0.394886	SVZCs	0.467451	0.599157	0.951164	0.530045	0.720052	1.03966
NUDT7	8.18391	1.18421	2.74773e-16	1.94608e-15	0.0411239	ARPs	0.102102	0.0492581	0.108618	0.0525323	0.107516	0.0711745
AC008014.1	20.6925	1.18353	4.04912e-95	2.06565e-93	0.312191	AR1	0.432008	0.858181	0.800792	0.85839	0.687538	0.595768
SPATA1	16.4457	1.18306	9.00182e-61	1.95049e-59	0.119927	SVZCs	0.238155	0.0960334	0.283365	0.134773	0.155682	0.301655
ASB8	13.1828	1.18301	1.10288e-39	1.53773e-38	0.0794381	ARPs	0.238669	0.0897435	0.193249	0.105246	0.134487	0.17723
AC010198.1	8.55041	1.18297	1.22647e-17	9.09695e-17	0.0469987	ARPs	0.0623334	0.0569808	0.124982	0.0648583	0.0921504	0.09976
AL121827.2	9.34665	1.18279	9.04644e-21	7.44887e-20	0.0521073	ARPs	0.0323735	0.0613321	0.134174	0.0303013	0.0764604	0.136042
TRIM16L	11.9779	1.18259	4.63763e-33	5.51902e-32	0.0725415	ARPs	0.222333	0.0803518	0.17388	0.104323	0.148951	0.108508
NIN	34.6486	1.18235	4.68813e-263	5.66659e-261	0.547382	ARPs	1.45686	0.865429	1.41654	0.990195	1.02067	1.21258
LRRC49	28.4922	1.18232	1.46139e-178	1.09258e-176	0.290421	ARPs	0.71364	0.387425	0.729404	0.541815	0.579916	0.671571
DIPK1C	13.0906	1.18221	3.72584e-39	5.78038e-38	0.0779221	SVZCs	0.0891858	0.128545	0.188826	0.0876317	0.130878	0.104179
AL137009.1	12.2216	1.1822	2.38474e-34	1.85902e-32	0.233148	WMAs	0.640333	0.200531	0.524422	0.307081	0.265313	0.732694
AL139807.1	13.154	1.18207	1.61442e-39	2.24286e-38	0.0863346	ARPs	0.187763	0.108001	0.230143	0.105365	0.127916	0.323858
TYW5	19.5394	1.18196	5.07533e-85	1.62121e-83	0.143295	ARPs	0.467506	0.167098	0.345456	0.198894	0.248447	0.337282
FUT10	32.766	1.18133	1.79851e-235	1.16836e-233	0.369521	SVZCs	1.12075	0.48437	0.872231	0.478656	0.687502	0.69842
SLC39A12	24.8052	1.18127	7.88735e-136	7.05186e-134	0.305481	AR2	0.832171	0.56095	0.729617	0.579406	0.812259	0.38779
TRIM9	46.2848	1.18097	0	0	0.770495	SVZCs	2.10252	1.64984	2.12286	1.44549	1.68507	2.39568
FSBP	7.00528	1.18017	2.46485e-12	1.71422e-11	0.036526	SVZCs	0.152102	0.0207729	0.082185	0.0371034	0.0544702	0.0478303
CYP4V2	29.5269	1.17953	1.29927e-191	1.07827e-189	0.33742	ARPs	0.852549	0.437782	0.808307	0.428003	0.691037	0.601242
FAM171B	38.9614	1.17928	0	0	0.699147	AR2	1.93275	0.763342	1.71742	0.954227	0.992551	1.10461
TNS3	28.5607	1.17918	2.06694e-179	2.76843e-177	0.35542	AR2	0.786135	0.419529	0.801296	0.603914	0.759775	0.433389
ZBED5-AS1	16.249	1.17831	2.27166e-59	4.8346e-58	0.116731	ARPs	0.16728	0.133287	0.279653	0.189418	0.203954	0.172311
NPL	39.2956	1.1782	0	0	0.685993	AR2	1.78248	1.26618	1.68665	1.23701	2.2695	1.0801
STK17A	20.0436	1.17807	2.29709e-89	7.69171e-88	0.155556	ARPs	0.597341	0.184283	0.376983	0.187504	0.307694	0.399766
AL157396.1	29.6801	1.17806	1.38682e-193	2.0299e-191	0.356638	AR2	0.96328	0.676145	0.78977	0.468621	0.658701	0.42632
LINC02427	14.3626	1.17775	8.877e-47	2.13701e-45	0.161478	AR1	0.153032	0.202862	0.317792	0.218174	0.275107	0.28506
GRM3	37.6697	1.17756	0	0	0.696468	AR2	1.94749	0.176246	1.90596	0.12317	0.272449	1.2617
MLLT3	35.8059	1.17664	8.93355e-281	7.04329e-279	0.508929	SVZCs	1.46691	0.772021	1.36719	0.830149	1.13331	0.98392
PCDH9	69.2563	1.17637	0	0	0.994927	SVZCs	4.63326	3.85997	4.63304	3.82982	4.46861	4.3173
ZNF277	31.4845	1.17625	1.41528e-217	8.4941e-216	0.337865	SVZCs	0.887671	0.406101	0.820399	0.446349	0.600957	0.624507
AL590652.1	7.942	1.17596	1.98942e-15	2.50774e-14	0.0562728	AR2	0.0948766	0.0887558	0.132824	0.118334	0.123514	0.0609722
MID1	33.4527	1.17591	2.35389e-245	4.69291e-243	0.512302	AR2	1.46795	0.686458	1.20478	0.878437	1.01922	0.70997
LINC00595	8.19265	1.17485	2.55538e-16	1.8128e-15	0.0462324	ARPs	0.140453	0.0498071	0.10912	0.0504996	0.0668176	0.0686019
EPB41L2	39.9397	1.17438	0	0	0.614854	SVZCs	1.58932	0.83681	1.55627	0.977415	1.31157	1.57418
GPR37L1	28.3868	1.17425	2.944e-177	2.18688e-175	0.302682	ARPs	0.810782	0.408956	0.760907	0.39822	0.624188	0.488282
AKAP7	33.2748	1.17384	8.94908e-243	6.03976e-241	0.390625	SVZCs	0.968991	0.50617	0.971251	0.546655	0.670508	1.01383
RAP1GAP2	14.4096	1.17354	4.50191e-47	8.06669e-46	0.0896916	SVZCs	0.151383	0.187418	0.220715	0.1039	0.235691	0.223966
MRPL15	9.38611	1.17277	6.22545e-21	6.16503e-20	0.0533685	SVZCs	0.178283	0.0569604	0.120112	0.0550654	0.0980616	0.148575
MGST1	42.265	1.17212	0	0	0.740869	SVZCs	2.46035	1.59022	2.00227	1.34618	1.75933	2.42926
S100A13	19.1541	1.17185	8.94833e-82	2.75193e-80	0.157088	ARPs	0.761442	0.193713	0.393106	0.15951	0.227887	0.358551
ANO5	29.7466	1.1718	1.91731e-194	1.05406e-192	0.343141	SVZCs	0.667474	0.524491	0.849689	0.466436	0.675367	1.12234
IFI44	13.0922	1.17154	3.64871e-39	5.03676e-38	0.0871009	ARPs	0.141813	0.0992316	0.211061	0.127522	0.153874	0.184216
SLC6A11	24.9694	1.17147	1.31372e-137	5.31151e-136	0.223011	SVZCs	0.480714	0.300805	0.555968	0.28529	1.45505	0.939886
AC007325.2	10.1203	1.17056	4.48836e-24	4.93819e-23	0.0525568	SVZCs	0.0522032	0.0724088	0.117988	0.054141	0.105513	0.0588044
ACSL3	33.7345	1.17046	1.80628e-249	1.9829e-247	0.533589	ARPs	1.7526	0.850417	1.39066	0.979827	1.23729	1.4959
LINC00886	20.9831	1.16961	9.36183e-98	2.84629e-96	0.168831	SVZCs	0.339125	0.166731	0.42874	0.213475	0.217969	0.332823
AADAT	11.9126	1.16956	1.01724e-32	1.19865e-31	0.0720307	ARPs	0.168821	0.0826386	0.177131	0.0959933	0.0937283	0.161269
AC034195.1	10.5574	1.16799	4.69669e-26	6.87461e-25	0.120454	AR1	0.147395	0.212304	0.305165	0.202474	0.302303	0.276988
SPON1	41.8871	1.16772	0	0	0.740666	SVZCs	2.30575	1.75362	2.14296	1.47004	2.26863	1.69132
MARC1	12.4684	1.16691	1.11056e-35	2.61721e-34	0.0930572	AR2	0.227693	0.101471	0.200244	0.106644	0.165542	0.0941639
AC124854.1	22.6078	1.16679	3.63424e-113	1.22877e-111	0.190341	SVZCs	0.475106	0.289088	0.579822	0.300081	0.711838	0.226475
LINC01877	8.28558	1.16646	1.17534e-16	9.95558e-16	0.0531656	SVZCs	0.0879075	0.0527615	0.137589	0.0636459	0.099337	0.160308
CYFIP2	33.2061	1.16626	8.80402e-242	9.3398e-240	0.481992	ARPs	1.43124	0.728296	1.22521	0.702113	0.971739	0.945187
PLPP5	13.783	1.16603	3.22466e-43	4.91059e-42	0.0899106	ARPs	0.242188	0.10102	0.213923	0.110105	0.119987	0.262439
SHTN1	19.9449	1.16588	1.65951e-88	3.64358e-86	0.561459	WMAs	1.72151	0.831332	1.44112	1.35088	0.890996	1.53551
CEP350	35.7231	1.1657	1.7329e-279	2.25993e-277	0.618135	ARPs	1.84695	1.00621	1.58776	1.04164	1.76356	1.35021
PLEKHG1	36.4502	1.16528	6.83981e-291	5.55675e-289	0.509943	SVZCs	1.39444	0.822831	1.25699	0.752032	1.25143	1.07596
DSCAS	9.77799	1.1646	1.39969e-22	1.85822e-21	0.089904	AR1	0.0889562	0.136061	0.189423	0.111794	0.166903	0.18879
MKRN3	22.7293	1.16433	2.30014e-114	1.02825e-112	0.199234	ARPs	0.458789	0.256759	0.504466	0.222083	0.315398	0.337693
IQCA1	35.7321	1.16431	1.25455e-279	1.64228e-277	0.683525	ARPs	2.0498	1.31694	1.96334	1.5144	2.01617	1.56658
AL713852.1	8.83469	1.16404	1.00377e-18	4.53395e-17	0.137193	WMAs	0.287205	0.0796064	0.285129	0.0656085	0.137356	0.187701
MRO	21.5485	1.16375	5.46337e-103	2.20377e-101	0.16705	ARPs	0.496513	0.208776	0.418807	0.217144	0.4139	0.255577
TP53	17.8802	1.16357	1.68335e-71	4.0722e-70	0.129667	SVZCs	0.250321	0.235999	0.300488	0.145376	0.184153	0.448182
COL5A2	16.6789	1.16278	1.8664e-62	4.19608e-61	0.128736	ARPs	0.297929	0.173984	0.354502	0.214169	0.19681	0.187757
AC083864.5	12.556	1.16236	3.68347e-36	7.05965e-35	0.146058	AR1	0.144954	0.473973	0.299463	0.213859	0.222523	0.328146
CADM1	32.3138	1.16206	4.47686e-229	5.35525e-226	0.954005	WMAs	3.37219	2.00738	3.19533	2.08465	2.4393	3.27196
ACAA2	15.0234	1.16116	5.1601e-51	9.80306e-50	0.0986201	SVZCs	0.242133	0.0900953	0.227078	0.107949	0.135141	0.246393
NHS	9.19178	1.16084	3.86386e-20	1.86163e-18	0.0959556	WMAs	0.327235	0.509029	0.280185	0.531195	0.135081	0.55474
BCO1	8.02661	1.16073	1.002e-15	1.04132e-14	0.0791388	AR1	0.0714491	0.150907	0.153223	0.159989	0.150707	0.272205
UQCRFS1	8.07989	1.16034	6.48244e-16	4.53014e-15	0.0521073	ARPs	0.212758	0.0568005	0.122774	0.065892	0.0816749	0.132348
PPM1K	31.7131	1.16023	1.02583e-220	9.67014e-219	0.453895	ARPs	1.68126	0.670632	1.14276	0.938481	1.01018	0.671059
ZNF404	15.9117	1.16005	5.25425e-57	1.06528e-55	0.102682	ARPs	0.195462	0.119627	0.249957	0.153126	0.165343	0.241777
FUT10	29.4946	1.15975	3.37346e-191	2.78632e-189	0.344061	ARPs	1.12075	0.48437	0.872231	0.478656	0.687502	0.69842
AL122014.1	12.6524	1.15959	1.0851e-36	1.60452e-35	0.0756899	SVZCs	0.155835	0.0540615	0.205348	0.0971636	0.067089	0.0833898
LRP8	14.8592	1.15932	6.06353e-50	1.13577e-48	0.0998377	SVZCs	0.200043	0.136152	0.224806	0.106935	0.123225	0.202944
KLHL32	31.6772	1.1591	3.20574e-220	5.64502e-218	0.457247	AR2	1.03178	0.519523	1.09991	0.90848	1.11032	0.640445
PPM1K	33.7656	1.15897	6.30421e-250	1.34168e-247	0.517174	AR2	1.68126	0.670632	1.14276	0.938481	1.01018	0.671059
PRODH	17.2996	1.15886	4.73893e-67	1.09086e-65	0.110187	SVZCs	0.133136	0.14884	0.248196	0.118822	0.248627	0.165454
AC007014.1	7.79495	1.15881	6.44356e-15	5.04918e-14	0.0558036	SVZCs	0.12534	0.0537443	0.127598	0.0591698	0.102504	0.218411
FAP	7.17087	1.15817	7.45223e-13	8.34197e-12	0.0550548	AR2	0.363984	0.278983	0.134238	0.41547	0.772322	0.0623864
TENM3	18.1546	1.15769	1.18081e-73	2.17885e-71	0.51705	WMAs	1.5892	0.724311	1.36499	1.09727	0.835901	1.13055
AL162511.1	10.9531	1.15753	6.41946e-28	1.22425e-26	0.0752741	AR2	0.178901	0.49199	0.179915	0.74565	0.149	0.0846744
TDRD10	10.8739	1.15735	1.53485e-27	1.84939e-26	0.0527597	SVZCs	0.210835	0.0361754	0.134691	0.0626387	0.0635389	0.13207
AC008050.1	11.2665	1.15608	1.92055e-29	3.84442e-28	0.0911084	AR2	0.16971	0.122164	0.21653	0.126204	0.185251	0.102994
INO80C	6.97618	1.15606	3.03319e-12	1.82739e-11	0.042401	ARPs	0.0948905	0.0458938	0.0995346	0.083162	0.0728644	0.0931629
MIS18BP1	9.13601	1.156	6.4799e-20	5.1902e-19	0.056705	ARPs	0.160616	0.0686647	0.147028	0.0891375	0.114712	0.123655
DIPK1C	9.70459	1.15571	2.88224e-22	3.78158e-21	0.0980506	AR1	0.0891858	0.128545	0.188826	0.0876317	0.130878	0.104179
PRSS35	10.4727	1.15561	1.15261e-25	2.06315e-24	0.0842875	AR2	0.121354	0.0245213	0.178503	0.0164169	0.0231669	0.0840855
HDDC2	13.6958	1.15497	1.07559e-42	1.03934e-40	0.285488	WMAs	1.11678	0.240082	0.59721	0.372596	0.312555	0.651847
KLF12	36.2041	1.1548	5.25295e-287	1.39103e-284	0.611693	AR2	1.56327	0.997246	1.49388	1.1977	1.46167	0.936655
MEIS1	26.2455	1.1546	8.05247e-152	5.0061e-150	0.264879	ARPs	0.650615	0.368913	0.689771	0.349228	0.592291	0.438911
LINC00595	8.68225	1.15443	3.87998e-18	3.47346e-17	0.049513	SVZCs	0.140453	0.0498071	0.10912	0.0504996	0.0668176	0.0686019
AC079142.1	25.0593	1.15434	1.38183e-138	7.73159e-137	0.302171	ARPs	0.76774	0.489572	0.877912	0.508645	0.834374	0.798807
CELF2-AS2	11.0999	1.15418	1.25561e-28	1.55561e-27	0.0856331	SVZCs	0.255254	0.0543983	0.193644	0.0916704	0.0975053	0.228361
CKMT2	18.9327	1.15387	6.13272e-80	1.60926e-78	0.145495	SVZCs	0.455922	0.216958	0.325985	0.159738	0.50378	0.227533
FAM153CP	10.7011	1.15356	1.00619e-26	1.19047e-25	0.0608766	SVZCs	0.0816164	0.0816615	0.143615	0.0671193	0.084958	0.131192
KCNA2	19.9244	1.15355	2.50188e-88	1.32101e-86	0.196102	AR2	0.479644	0.270761	0.407887	0.227286	0.366625	0.204078
WIF1	24.8792	1.15318	1.24994e-136	1.13509e-134	0.384653	AR2	0.912277	0.0271199	0.919234	0.0723141	0.0342559	0.51746
PNPLA7	25.1265	1.15308	2.5519e-139	2.38613e-137	0.284531	AR2	0.549051	0.52263	0.599491	0.585835	0.56526	0.31427
SLC25A5	8.74192	1.15289	2.2919e-18	1.74931e-17	0.0559387	ARPs	0.223914	0.0651616	0.139516	0.0622922	0.066956	0.135133
AC004158.1	21.6015	1.15237	1.73882e-103	7.03848e-102	0.194891	ARPs	0.296823	0.26127	0.509029	0.527812	0.51856	0.233539
TBC1D4	12.235	1.15215	2.02212e-34	2.48749e-33	0.0899106	ARPs	0.167294	0.112057	0.23391	0.142529	0.172628	0.129675
ATP2C1	20.5255	1.15207	1.27526e-93	2.91046e-91	0.541634	WMAs	2.0837	0.563944	1.21548	0.772876	0.726251	1.07691
CHL1-AS2	17.9349	1.15195	6.299e-72	2.7314e-70	0.174421	AR2	0.54774	0.293991	0.437579	0.235187	0.348238	0.220771
TBC1D1	34.5297	1.1514	2.87722e-261	2.12363e-259	0.466924	SVZCs	1.36263	0.831415	1.16815	0.691966	1.08797	1.2292
FAM118B	17.2488	1.15139	1.14155e-66	2.76153e-65	0.11622	ARPs	0.324315	0.137609	0.283446	0.181549	0.170507	0.237768
LYPD1	16.0728	1.15127	3.95599e-58	8.31214e-57	0.113231	SVZCs	0.39017	0.0549031	0.260577	0.125772	0.140244	0.164883
SLC39A11	37.1211	1.15107	1.28371e-301	3.68032e-299	0.724239	AR2	2.04756	1.84738	1.97363	2.25103	2.52586	1.33246
HAP1	8.85152	1.15106	8.6337e-19	3.90996e-17	0.120539	WMAs	0.473945	0.206443	0.290509	0.190989	0.141324	0.623864
PIGC	19.7257	1.15074	1.29773e-86	3.59858e-85	0.155641	SVZCs	0.483373	0.238596	0.362762	0.17978	0.247644	0.361807
STK17A	21.1632	1.15068	2.08749e-99	6.4714e-98	0.167614	SVZCs	0.597341	0.184283	0.376983	0.187504	0.307694	0.399766
FBXO7	22.9542	1.15041	1.33731e-116	6.10411e-115	0.199234	ARPs	0.570889	0.233535	0.459906	0.33412	0.382047	0.370927
LINC02021	7.44579	1.15036	9.63635e-14	9.1061e-13	0.0744836	AR1	0.0615885	0.124984	0.131909	0.154049	0.135413	0.100082
AC009879.4	13.3116	1.15018	1.98204e-40	1.81417e-38	0.256939	WMAs	0.415648	0.207685	0.593078	0.151862	0.310978	0.438682
LGI1	38.8082	1.14948	0	0	0.605519	SVZCs	1.98855	1.18246	1.52673	0.964788	1.2731	0.913595
PYGB	24.0836	1.14929	3.71369e-128	3.11178e-126	0.263581	AR2	0.512912	0.541882	0.535702	0.526318	0.734738	0.277247
MSANTD4	23.2676	1.14827	9.43196e-120	3.36967e-118	0.20556	SVZCs	0.470454	0.232797	0.443629	0.22467	0.306017	0.448542
RHPN2	12.3462	1.14781	5.10442e-35	4.08001e-33	0.185567	WMAs	0.378764	0.289638	0.416137	0.252482	0.209384	0.448936
METTL7A	33.3254	1.14768	1.65407e-243	1.12069e-241	0.421266	SVZCs	1.24805	0.579199	0.953738	0.542371	0.869224	0.627244
CTXND1	22.2407	1.14761	1.38654e-109	4.57651e-108	0.183644	SVZCs	0.910757	0.194087	0.470595	0.240001	0.620138	0.21053
NR3C2	34.7971	1.14735	2.69328e-265	3.3249e-263	0.63908	ARPs	1.73889	1.15093	1.75562	1.4248	1.83904	1.22803
GPSM2	27.8798	1.14711	4.68382e-171	3.32274e-169	0.303704	ARPs	0.817332	0.415104	0.760583	0.569021	0.727192	0.690619
LINC01572	19.349	1.14638	2.07854e-83	6.46678e-82	0.179821	ARPs	0.260821	0.250859	0.489288	0.468307	0.408472	0.335662
GRIN2C	17.0722	1.14599	2.39094e-65	3.6378e-63	0.379857	WMAs	1.00389	0.642848	0.829407	0.38585	0.459833	0.948148
RGN	18.8286	1.14524	4.4011e-79	1.29605e-77	0.156322	ARPs	0.453154	0.189091	0.378707	0.256347	0.300336	0.301998
SOX5-AS1	7.5997	1.14451	2.96821e-14	2.25904e-13	0.057224	SVZCs	0.118064	0.0348357	0.126589	0.0592533	0.0822014	0.209543
SLC25A48	15.9922	1.14449	1.44857e-57	1.90344e-55	0.314036	WMAs	0.774696	0.298388	0.759538	0.335617	0.415053	0.541039
PLEKHO1	20.3406	1.14336	5.62716e-92	1.95402e-90	0.157344	ARPs	0.479414	0.191626	0.382926	0.220361	0.165996	0.417406
HRH1	8.38841	1.14305	4.92769e-17	2.02059e-15	0.117367	WMAs	0.431601	0.311665	0.307485	0.224977	0.15101	0.427183
KLHL15	9.20451	1.14262	3.43241e-20	2.77812e-19	0.0536398	ARPs	0.142201	0.0609942	0.130024	0.0943342	0.122263	0.240161
SMURF2	32.2465	1.14239	3.93928e-228	2.4801e-226	0.395292	SVZCs	0.819757	0.512865	0.926629	0.525486	0.55606	1.24807
ZCRB1	14.6534	1.14235	1.28108e-48	2.1892e-47	0.102427	ARPs	0.543016	0.119957	0.247899	0.127612	0.186304	0.215552
PHLPP1	47.0352	1.14225	0	0	0.838002	AR2	2.26936	1.32463	2.23816	1.53338	2.00342	1.56753
MAST4	27.5509	1.14175	4.31699e-167	3.18631e-164	0.865979	WMAs	2.50852	1.49904	2.47205	1.3715	1.77764	2.5142
FKBP9	15.9689	1.1415	2.1036e-57	4.30525e-56	0.112133	ARPs	0.237887	0.126618	0.260661	0.13893	0.128621	0.307399
MEF2C	30.087	1.14124	7.15909e-199	4.0121e-197	0.345576	SVZCs	0.862756	0.49014	0.815225	0.451778	0.59973	0.800113
AC027117.1	16.3016	1.14093	9.60808e-60	2.05237e-58	0.112825	SVZCs	0.157133	0.111837	0.239536	0.115768	0.187654	0.149615
AP003025.1	8.71171	1.14	2.99338e-18	1.3161e-16	0.133228	WMAs	0.272139	0.125108	0.299256	0.165926	0.14695	0.402153
AC004982.2	8.56306	1.13999	1.09916e-17	8.16833e-17	0.0510856	ARPs	0.095121	0.0573896	0.122372	0.0854441	0.0701746	0.113295
CLASP2	37.0549	1.13959	1.49518e-300	2.1433e-298	0.673308	ARPs	1.98079	1.19307	1.80189	1.70784	1.63915	1.36426
MCF2L2	13.9083	1.13942	5.64075e-44	8.69678e-43	0.111367	ARPs	0.289686	0.149215	0.303432	0.208191	0.101629	0.351132
PPP1R3D	10.5759	1.13898	3.85562e-26	4.50039e-25	0.0706169	SVZCs	0.317164	0.0867191	0.148677	0.0702612	0.117656	0.129301
AC024145.1	15.2884	1.13892	9.13216e-53	1.71148e-51	0.120562	ARPs	0.328472	0.153434	0.311292	0.135218	0.138107	0.602387
AC053513.1	26.7099	1.13869	3.60762e-157	3.35035e-155	0.511784	AR1	0.73696	0.843064	1.22349	0.687842	0.937421	0.907835
CHAMP1	7.33077	1.13862	2.28828e-13	1.44093e-12	0.0436782	ARPs	0.0939776	0.0481069	0.103013	0.0585221	0.0583271	0.118155
LINC01080	8.77774	1.13841	1.66796e-18	1.93711e-17	0.0890311	AR1	0.0810588	0.114559	0.170479	0.126722	0.179216	0.144376
NDUFB4	18.825	1.13833	4.71365e-79	1.38573e-77	0.163729	ARPs	1.43574	0.195565	0.388975	0.241361	0.225279	0.342875
GRIA2	22.3788	1.13791	6.32645e-111	1.89194e-108	0.684377	WMAs	1.57343	0.56401	1.65493	0.423195	1.07276	1.2939
AC015908.2	7.8908	1.13775	3.00245e-15	3.04992e-14	0.0724469	AR1	0.0731299	0.215397	0.154388	0.209416	0.166999	0.350604
TMEM170B	19.8102	1.13765	2.4327e-87	7.99908e-86	0.162452	ARPs	0.519404	0.192235	0.382776	0.251616	0.276622	0.308419
LINC00923	9.269	1.13763	1.87895e-20	1.83298e-19	0.0750812	SVZCs	0.177057	0.101728	0.235562	0.113976	0.166215	0.194571
HORMAD2-AS1	8.30305	1.13751	1.01468e-16	8.61464e-16	0.0487013	SVZCs	0.0889384	0.0331139	0.105169	0.049179	0.0830666	0.0896577
GULP1	8.28004	1.13747	1.23136e-16	1.636e-15	0.0767357	AR2	0.138698	0.188178	0.186183	0.194623	0.129426	0.0889459
RPL36AL	10.1514	1.13679	3.26738e-24	3.60858e-23	0.0793425	SVZCs	0.706282	0.0967316	0.184059	0.087922	0.138406	0.19403
AC003681.1	12.0251	1.13664	2.62248e-33	3.14462e-32	0.0814815	ARPs	0.187564	0.0938496	0.195846	0.145746	0.124791	0.263187
AC018638.7	8.44693	1.13664	2.99055e-17	2.59485e-16	0.0489042	SVZCs	0.124007	0.0462946	0.0980948	0.0458113	0.0997647	0.0805501
RAB31	33.1772	1.13647	2.29531e-241	1.53715e-239	0.417817	SVZCs	1.21508	0.750043	1.01658	0.589044	0.983251	1.14095
LINC00886	10.7831	1.1362	4.13813e-27	2.58187e-25	0.183981	WMAs	0.339125	0.166731	0.42874	0.213475	0.217969	0.332823
FGD6	19.8717	1.13615	7.15421e-88	1.55112e-85	0.507534	WMAs	1.26519	0.646984	1.14398	0.898664	0.679699	0.85496
PFDN1	18.6371	1.13611	1.60643e-77	4.60935e-76	0.145083	ARPs	0.3886	0.172894	0.347006	0.220903	0.25322	0.412536
AC063979.2	10.9571	1.13605	6.14069e-28	6.30985e-27	0.0704981	ARPs	0.182812	0.0898137	0.187746	0.220494	0.13889	0.0979232
GJA1	32.1489	1.13568	9.13648e-227	8.9786e-225	0.629374	ARPs	2.36596	1.19497	1.8019	1.74995	1.92512	1.14105
EDNRB	33.7736	1.13548	4.82073e-250	1.0387e-247	0.582217	AR2	1.47992	0.442056	1.31095	0.373191	0.999618	0.803527
HEY2	16.2261	1.13523	3.2964e-59	7.00259e-58	0.120307	ARPs	0.351606	0.142726	0.290412	0.245983	0.156658	0.15021
ZFAND4	18.3152	1.13518	6.25642e-75	1.73074e-73	0.138953	ARPs	0.362076	0.1601	0.323074	0.222411	0.285105	0.28544
AL137139.2	27.6631	1.135	1.9431e-168	2.38184e-166	0.548599	AR2	1.49904	1.40066	1.45137	1.72434	0.542369	0.911665
SLC15A2	35.1096	1.13472	4.81154e-270	3.63643e-268	0.482346	SVZCs	1.35835	0.364786	1.10804	0.654294	0.839919	0.551917
SELENBP1	17.3815	1.13446	1.13887e-67	2.64441e-66	0.124797	SVZCs	0.31074	0.111709	0.275084	0.134734	0.126421	0.201104
DLC1	19.491	1.13445	1.30828e-84	2.70144e-82	0.680412	WMAs	2.18256	0.612776	1.81025	0.758702	1.20254	1.79039
KLKB1	24.3341	1.13422	8.54989e-131	3.30285e-129	0.23539	SVZCs	0.517023	0.248451	0.524638	0.27329	0.381084	0.261238
EPAS1	10.3303	1.13407	5.13937e-25	2.98135e-23	0.161776	WMAs	0.312069	0.239631	0.358656	0.0630835	0.179451	0.657637
GPATCH2	23.5879	1.13309	5.12677e-123	2.44632e-121	0.221967	ARPs	0.529522	0.298839	0.56753	0.374098	0.456379	0.610221
RNF139	6.89166	1.13265	5.51467e-12	3.28927e-11	0.0416347	ARPs	0.108107	0.0443284	0.0947475	0.0632016	0.0763934	0.0827859
PCDH9	56.2182	1.13193	0	0	0.991571	ARPs	4.63326	3.85997	4.63304	3.82982	4.46861	4.3173
PHF21B	34.2038	1.13192	2.12666e-256	2.40305e-254	0.582886	ARPs	1.73979	0.952159	1.50126	0.927647	1.42682	1.17363
OTUD7A	31.9416	1.13181	7.06615e-224	6.80902e-222	0.529246	ARPs	1.309	0.860799	1.38411	0.70434	1.56694	1.27054
OSBPL6	34.8931	1.13172	9.44553e-267	7.09233e-265	0.518669	SVZCs	1.29974	0.894488	1.26519	0.770523	1.16371	1.11446
MRVI1-AS1	11.8643	1.13108	1.8148e-32	2.43824e-31	0.0797484	SVZCs	0.114882	0.0936387	0.178281	0.0853567	0.0990956	0.308325
CA2	19.0948	1.13088	2.78893e-81	7.42502e-80	0.144886	SVZCs	0.486989	0.208332	0.324149	0.16112	0.196347	0.369667
AC091912.3	6.90886	1.13071	4.88576e-12	3.34294e-11	0.0434253	SVZCs	0.0445874	0.0557786	0.116236	0.0547652	0.0923898	0.0735416
KCNMB2	7.3689	1.13044	1.72037e-13	5.58274e-12	0.135607	WMAs	0.230931	0.125424	0.31089	0.118449	0.154058	0.327199
ST6GAL2	14.6769	1.13028	9.06871e-49	1.67159e-47	0.0919237	SVZCs	0.103687	0.306539	0.250652	0.122335	0.241298	0.103939
ST7-OT4	6.76228	1.12999	1.35836e-11	7.94227e-11	0.0421456	ARPs	0.098632	0.0418232	0.0893601	0.0579682	0.0843016	0.0814595
PLXNA2	33.7843	1.12995	3.35357e-250	2.35496e-248	0.452719	SVZCs	1.20851	0.85124	1.0883	0.64175	1.00063	0.760845
COLCA2	12.9094	1.12988	3.98556e-38	5.36512e-37	0.0809706	ARPs	0.256551	0.0935486	0.194418	0.126651	0.161423	0.132458
GLRB	12.8073	1.12951	1.49199e-37	2.24836e-36	0.0801542	SVZCs	0.21404	0.0799229	0.196303	0.0945251	0.164381	0.152054
MRPL34	8.88994	1.12905	6.11397e-19	4.75653e-18	0.0643678	ARPs	0.283554	0.0710931	0.149412	0.0955831	0.0704342	0.138914
ATIC	21.0315	1.12895	3.37924e-98	1.27976e-96	0.175479	ARPs	0.544178	0.205181	0.404185	0.328175	0.306335	0.31147
CHSY1	26.3202	1.12874	1.12678e-152	5.02415e-151	0.249391	SVZCs	0.588433	0.355016	0.576985	0.305283	0.508007	0.871614
ZFPM2	33.2262	1.12845	4.5027e-242	3.03298e-240	0.499188	SVZCs	1.30932	0.766182	1.3017	0.799226	1.44839	0.905489
AC098588.3	15.5354	1.12828	1.99903e-54	4.0131e-53	0.120739	SVZCs	0.283344	0.197447	0.335325	0.167419	0.24496	0.270705
ARL14EP	12.8051	1.1277	1.53439e-37	2.03939e-36	0.088378	ARPs	0.331801	0.0982091	0.203339	0.137716	0.155592	0.234267
SPX	9.58861	1.12751	8.92754e-22	1.42981e-20	0.0689403	AR2	0.28903	0.213017	0.150376	0.355975	0.233656	0.0716439
CALN1	22.5332	1.12715	1.96324e-112	1.20753e-110	0.423625	AR1	0.642036	0.7906	1.08741	0.302605	0.41831	1.64134
CAAP1	21.5169	1.1271	1.0822e-102	4.34506e-101	0.177522	ARPs	0.462728	0.219319	0.428937	0.228957	0.338715	0.348474
SOX21-AS1	21.0496	1.12651	2.30618e-98	1.39133e-96	0.250183	AR2	0.510173	0.254265	0.550473	0.374689	0.30456	0.289847
SULT1C4	11.4382	1.12632	2.69489e-30	2.95239e-29	0.0733078	ARPs	0.218583	0.0820349	0.171121	0.166904	0.175016	0.144372
ALG1L9P	15.8039	1.12627	2.92331e-56	8.40875e-55	0.216468	AR1	0.203825	0.356762	0.40114	0.393176	0.345651	0.358719
DCUN1D1	31.7674	1.12581	1.82604e-221	1.11918e-219	0.386769	SVZCs	1.15668	0.3914	0.861519	0.486313	0.700602	0.613006
HNMT	9.4111	1.12532	4.90953e-21	7.66823e-20	0.0818514	AR2	0.267767	0.212457	0.165148	0.376639	0.205369	0.0791013
PLIN2	15.2479	1.12484	1.69967e-52	3.31059e-51	0.107549	SVZCs	0.353668	0.156788	0.238333	0.11637	0.28633	0.27517
SEMA4A	9.26732	1.12384	1.90879e-20	9.29999e-19	0.131642	WMAs	0.220096	0.0788333	0.277134	0.0505174	0.136746	0.142152
MRPL15	8.58858	1.12258	8.80507e-18	6.5589e-17	0.0521073	ARPs	0.178283	0.0569604	0.120112	0.0550654	0.0980616	0.148575
BDH1	19.5495	1.12237	4.16737e-85	1.33487e-83	0.134866	ARPs	0.308573	0.170099	0.339092	0.137985	0.282532	0.319721
MTX2	26.585	1.12199	1.01283e-155	6.50649e-154	0.30447	ARPs	0.937767	0.387378	0.707897	0.560157	0.623627	0.705929
DEPP1	12.2502	1.12147	1.67563e-34	2.36098e-33	0.0821834	SVZCs	0.273102	0.231649	0.22758	0.111059	0.289404	0.472498
AC018638.7	8.02878	1.12115	9.84491e-16	6.82903e-15	0.0446999	ARPs	0.124007	0.0462946	0.0980948	0.0458113	0.0997647	0.0805501
MMGT1	7.58995	1.12034	3.20034e-14	2.08684e-13	0.0487867	ARPs	0.157751	0.0526949	0.11121	0.0731631	0.0804943	0.101069
LCN12	9.756	1.11864	1.73878e-22	2.29871e-21	0.0974687	AR1	0.0901759	0.118995	0.186405	0.131628	0.138545	0.186361
KCTD8	27.0241	1.11837	7.70826e-161	5.13243e-159	0.394381	ARPs	1.21327	0.675736	1.13014	0.647136	1.15901	1.16471
FKBP9	8.54488	1.11738	1.2867e-17	5.49023e-16	0.1364	WMAs	0.237887	0.126618	0.260661	0.13893	0.128621	0.307399
FZD6	13.7212	1.1172	7.58129e-43	1.13949e-41	0.0934866	ARPs	0.223774	0.107472	0.220036	0.154101	0.179111	0.292465
ZDHHC21	31.8943	1.11684	3.20428e-223	3.06216e-221	0.5106	ARPs	1.58166	0.767172	1.25333	1.10446	1.24333	1.34494
PPIP5K2	28.3439	1.1166	9.93916e-177	7.35159e-175	0.34023	ARPs	0.864837	0.437576	0.784043	0.574631	0.574469	0.772081
FAM155A	28.0296	1.11653	7.08748e-173	7.58841e-171	0.692464	AR1	1.63764	1.85767	2.3009	1.43574	2.05779	2.05596
SAT1	19.1684	1.11621	6.79321e-82	1.3701e-79	0.479778	WMAs	1.29284	0.433766	1.13784	0.366879	0.682077	1.36276
C2CD6	15.9362	1.1158	3.55313e-57	7.36748e-56	0.127435	SVZCs	0.287004	0.0906519	0.31547	0.157985	0.130355	0.208616
F11-AS1	15.2053	1.11574	3.26297e-52	3.77308e-50	0.370341	WMAs	0.702264	0.339682	0.961186	0.219017	0.556843	0.525504
TBC1D30	11.2656	1.1154	1.93916e-29	2.44973e-28	0.0685877	SVZCs	0.157738	0.0950991	0.170254	0.0821966	0.14552	0.195149
TEX15	11.704	1.1152	1.21629e-31	2.5997e-30	0.104994	AR2	0.355318	0.147854	0.246726	0.15138	0.16098	0.121489
EXOSC8	11.9904	1.11445	3.98819e-33	4.76085e-32	0.0819923	ARPs	0.228504	0.0924944	0.190468	0.12447	0.11088	0.217924
UFL1-AS1	20.5118	1.11429	1.68942e-93	8.4936e-92	0.340995	AR1	0.390838	0.478543	0.710637	0.494375	0.49271	0.52626
CISD1	18.6334	1.11423	1.72149e-77	4.44003e-76	0.145495	SVZCs	0.483128	0.199386	0.319889	0.160535	0.243236	0.381165
FGFR2	35.8019	1.11367	1.03114e-280	8.1112e-279	0.573255	SVZCs	1.22445	0.870452	1.42845	0.902575	0.787458	1.75537
INHBB	9.55964	1.11362	1.18168e-21	1.00398e-20	0.056705	ARPs	0.10778	0.0661217	0.137948	0.0625994	0.0874655	0.0828506
SYCP2L	14.8703	1.11357	5.13722e-50	9.63298e-49	0.116274	SVZCs	0.0937186	0.206066	0.289192	0.144084	0.257636	0.226394
ABTB2	8.41823	1.11281	3.82214e-17	1.57284e-15	0.11816	WMAs	0.235762	0.181406	0.299761	0.12094	0.149818	0.515832
LINC00598	23.8071	1.11266	2.81929e-125	1.36594e-123	0.292465	ARPs	0.984428	0.454386	0.808193	0.541026	0.606069	0.682504
AC004039.1	7.27842	1.11254	3.37754e-13	2.11264e-12	0.054917	ARPs	0.165169	0.0629762	0.131511	0.128007	0.0595012	0.237501
NR1D1	9.62138	1.11243	6.49513e-22	1.04458e-20	0.079659	AR2	0.226788	0.0939712	0.158684	0.0917881	0.145296	0.0765328
CPT1A	29.1019	1.11162	3.3984e-186	1.79165e-184	0.303166	SVZCs	0.629275	0.474009	0.664071	0.362036	0.529929	0.615157
C12orf29	11.5427	1.11156	8.03737e-31	8.95364e-30	0.0786718	ARPs	0.299034	0.0896383	0.184516	0.105759	0.158901	0.121455
SLC22A23	29.9458	1.11005	4.98879e-197	2.76898e-195	0.334416	SVZCs	0.766069	0.377153	0.784473	0.439466	0.614366	0.831074
STK39	29.3674	1.10961	1.43488e-189	1.1712e-187	0.428608	ARPs	1.0628	0.647712	1.08727	0.703875	0.558429	1.16329
MT-CYB	27.8681	1.10916	6.49474e-171	8.16313e-169	0.526431	AR2	1.43365	1.463	1.29978	0.682085	1.07059	0.805143
TBC1D24	7.44247	1.10811	9.88194e-14	3.25241e-12	0.112609	WMAs	0.184533	0.135071	0.227093	0.132074	0.111783	0.356314
FEZF1-AS1	10.5339	1.10793	6.02807e-26	7.00314e-25	0.0645292	SVZCs	0.176463	0.0657924	0.14533	0.0700607	0.104354	0.160081
AC093535.1	24.4711	1.10744	2.99721e-132	1.55416e-130	0.302937	ARPs	0.83646	0.41041	0.738757	0.867314	0.585607	0.805815
AKR1C3	10.7969	1.1072	3.56162e-27	3.57089e-26	0.0730524	ARPs	0.331927	0.0822498	0.169472	0.127844	0.0954712	0.0994746
AC011416.4	17.9533	1.10656	4.51871e-72	1.19386e-70	0.152746	ARPs	0.437207	0.196298	0.383241	0.224709	0.301515	0.293633
RABL3	14.1584	1.10647	1.6574e-45	2.64833e-44	0.100894	ARPs	0.3319	0.117609	0.238013	0.138284	0.201197	0.241348
TNIK	59.2258	1.10647	0	0	0.97017	SVZCs	3.53596	2.60258	3.53566	2.80177	3.19634	3.13357
ARSJ	19.8887	1.10643	5.09611e-88	1.69171e-86	0.173946	ARPs	0.653727	0.230584	0.443647	0.283537	0.313924	0.52779
TRAF4	9.13363	1.10627	6.6238e-20	6.31436e-19	0.0531656	SVZCs	0.100062	0.0674634	0.120668	0.0578647	0.0709327	0.193459
ASPH	40.2042	1.10605	0	0	0.809451	ARPs	2.521	1.71674	2.38226	1.82366	2.19196	2.44697
COX7C	21.7975	1.10559	2.45027e-105	7.86306e-104	0.215706	SVZCs	1.46423	0.282724	0.501294	0.264255	0.372695	0.466115
DMXL2	27.5696	1.10529	2.57498e-167	1.80093e-165	0.307791	ARPs	0.817641	0.415151	0.745321	0.488115	0.55531	0.556855
AC079352.1	21.4197	1.10515	8.76361e-102	4.87977e-100	0.353215	AR1	0.564919	0.286426	0.968286	0.330593	1.1444	0.623981
TRDMT1	22.1105	1.10452	2.50254e-108	1.06259e-106	0.209706	ARPs	0.464182	0.259378	0.49271	0.437266	0.319294	0.416924
PLCH1	18.008	1.10417	1.68683e-72	3.01629e-70	0.493259	WMAs	1.46599	0.77864	1.23135	1.1327	0.755385	0.811624
NKAIN2	27.4286	1.10363	1.25045e-165	8.5897e-164	0.491188	ARPs	1.19108	0.930435	1.4586	1.09201	1.21999	1.14238
LINC01414	10.9885	1.10337	4.33885e-28	8.31114e-27	0.13179	AR2	0.184414	0.0494308	0.331238	0.0668994	0.139512	0.167859
NUF2	8.18261	1.10321	2.77753e-16	1.96678e-15	0.0600255	ARPs	0.172669	0.0682079	0.141192	0.11389	0.0709879	0.18064
PIPOX	14.5201	1.10321	9.03171e-48	1.63779e-46	0.103287	SVZCs	0.146273	0.146724	0.223747	0.110397	0.227999	0.195711
PLD5	10.2757	1.10319	9.06934e-25	1.01817e-23	0.0923295	SVZCs	0.136249	0.052193	0.21575	0.106237	0.128623	0.175621
AC015983.2	26.2297	1.10279	1.21826e-151	7.56016e-150	0.289911	ARPs	0.826016	0.404976	0.728646	0.452885	0.714161	0.595748
DYNC1I1	15.6225	1.10275	5.11229e-55	1.03348e-53	0.165381	SVZCs	0.454869	0.392651	0.460575	0.240893	0.379038	0.309516
AC004594.1	10.1395	1.10245	3.69043e-24	3.39849e-23	0.0779055	ARPs	0.205285	0.0965259	0.196875	0.128519	0.128669	0.265681
DCXR	14.5655	1.10227	4.65862e-48	8.49225e-47	0.101867	SVZCs	0.360053	0.141183	0.23034	0.11391	0.218431	0.250175
LINC02422	7.19785	1.10214	6.11698e-13	6.88061e-12	0.0562728	AR2	0.083653	0.0737235	0.117153	0.057305	0.0799058	0.0562838
LRRC75A	13.1529	1.10209	1.6371e-39	2.56277e-38	0.096388	SVZCs	0.16901	0.12068	0.201187	0.0987719	0.103974	0.217857
RAB34	13.4146	1.10184	4.96352e-41	7.99742e-40	0.0872565	SVZCs	0.186208	0.12497	0.195852	0.0960382	0.168134	0.369733
RGS20	33.3195	1.10169	2.01623e-243	2.15209e-241	0.704215	ARPs	2.0437	1.39063	2.01163	1.01082	1.15932	2.3494
CLK4	22.0192	1.10166	1.88639e-107	7.8937e-106	0.194636	ARPs	0.476725	0.230142	0.441697	0.281088	0.314798	0.457839
MRO	22.377	1.1008	6.59941e-111	2.19075e-109	0.182833	SVZCs	0.496513	0.208776	0.418807	0.217144	0.4139	0.255577
KCNN2	8.58064	1.10065	9.43475e-18	1.30603e-16	0.0811206	AR2	0.188672	0.465099	0.174573	0.83597	0.636243	0.085207
FAM200B	15.1574	1.10006	6.77137e-52	1.24351e-50	0.119285	ARPs	0.60854	0.136669	0.273025	0.144983	0.202914	0.28144
CASC15	12.17	1.09953	4.49024e-34	1.02613e-32	0.114738	AR2	0.208832	0.432593	0.259108	1.14946	0.304878	0.129298
IFIT1	7.00307	1.09941	2.5041e-12	1.74082e-11	0.0454545	SVZCs	0.118537	0.0275397	0.104376	0.0500712	0.0571822	0.0520389
CDH20	45.0832	1.09928	0	0	0.940804	AR2	3.39866	2.76713	3.25254	2.77296	3.53351	2.53382
NDUFB5	13.6767	1.09847	1.39853e-42	2.08308e-41	0.105747	ARPs	0.38801	0.11578	0.233362	0.120166	0.169298	0.243779
AL021707.1	6.84766	1.09793	7.50702e-12	4.45008e-11	0.0526181	ARPs	0.130429	0.0562988	0.116861	0.0860494	0.0816477	0.146511
ATP13A4	34.4585	1.09756	3.35526e-260	3.94556e-258	0.714432	ARPs	2.17209	1.41654	2.03896	1.82498	2.09663	1.5356
HECTD2	22.8947	1.09727	5.24792e-116	2.37663e-114	0.221711	ARPs	0.626639	0.283095	0.530692	0.318833	0.382295	0.673454
NQO1	12.5292	1.09694	5.16545e-36	7.53214e-35	0.0846185	SVZCs	0.584223	0.100324	0.192691	0.0947182	0.0928885	0.151066
SORCS2	36.5255	1.09604	4.37442e-292	3.58744e-290	0.578328	SVZCs	1.44076	1.01733	1.37923	0.87139	1.15042	1.63247
MPPED2	27.0068	1.09594	1.23033e-160	8.16063e-159	0.333078	ARPs	0.742435	0.511235	0.886437	0.710182	0.643384	0.604143
NLGN3	13.3119	1.09581	1.97446e-40	2.80713e-39	0.0873563	ARPs	0.17058	0.103707	0.209903	0.106578	0.168151	0.111526
MB21D2	8.01434	1.09519	1.1073e-15	7.65795e-15	0.0518519	ARPs	0.126014	0.0672264	0.138509	0.0997554	0.161325	0.0620809
C11orf74	10.5462	1.09517	5.29043e-26	5.13069e-25	0.0699872	ARPs	0.273494	0.0802278	0.164209	0.156887	0.145606	0.12174
TARBP1	25.4469	1.09474	7.64022e-143	4.4247e-141	0.261303	ARPs	0.63619	0.334794	0.614798	0.432291	0.42792	0.540815
FOXG1-AS1	19.8708	1.09425	7.29e-88	2.41307e-86	0.178033	ARPs	0.447337	0.220307	0.422777	0.331837	0.224886	0.282894
AL606923.2	9.91352	1.09416	3.6362e-23	6.09076e-22	0.10743	AR2	0.299095	0.464167	0.28089	0.627285	0.281642	0.141421
CCDC102B	13.9142	1.09413	5.1943e-44	1.18157e-42	0.169916	AR1	0.190136	0.241403	0.369538	0.223412	0.291871	0.280174
NDRG4	25.3861	1.09395	3.5897e-142	1.48955e-140	0.23681	SVZCs	0.528903	0.380388	0.523061	0.279093	0.401341	0.559634
CACNA1A	16.4478	1.09388	8.70176e-61	2.7195e-59	0.308699	AR1	0.393983	0.120933	0.708372	0.131523	0.124861	0.515055
COX7B	17.8192	1.0933	5.01426e-71	1.20879e-69	0.145698	SVZCs	0.988916	0.164694	0.321232	0.163437	0.231695	0.362858
GLI3	33.3892	1.09274	1.96394e-244	2.10926e-242	0.666667	ARPs	1.79984	1.25377	1.8468	1.07874	1.54897	1.41895
LINC00513	25.587	1.09264	2.12768e-144	1.24258e-142	0.298084	ARPs	1.3445	0.427542	0.759742	0.659139	0.611478	1.24974
RBKS	13.2239	1.0926	6.38944e-40	8.95916e-39	0.0962963	ARPs	0.191152	0.117246	0.235296	0.153032	0.181505	0.256832
SGCE	27.1103	1.09256	7.43889e-162	4.98176e-160	0.334355	ARPs	1.07167	0.453386	0.798985	0.509617	0.531755	0.738629
LRP4	33.5749	1.09254	3.90667e-247	7.97191e-245	0.555664	AR2	1.59013	0.646529	1.25608	0.652431	0.956886	0.778313
ARL6	17.7371	1.09192	2.1703e-70	5.56861e-69	0.143806	ARPs	0.347628	0.169266	0.33156	0.248669	0.243375	0.256119
PCDH9-AS2	15.5942	1.09174	7.96654e-55	9.83485e-53	0.450436	WMAs	1.38523	0.365281	1.16108	0.619404	0.707607	1.4091
HILPDA	11.7039	1.09171	1.21794e-31	2.08233e-30	0.181263	AR1	0.210049	0.840845	0.404238	0.425941	0.734561	1.45365
MSANTD4	21.3126	1.09092	8.67748e-101	3.41295e-99	0.192848	ARPs	0.470454	0.232797	0.443629	0.22467	0.306017	0.448542
MMP28	26.3362	1.0908	7.38483e-153	3.30128e-151	0.236404	SVZCs	0.483369	0.387187	0.539659	0.2896	0.597318	0.385075
C1orf54	19.3213	1.09069	3.5542e-83	9.60242e-82	0.1597	SVZCs	0.53461	0.154165	0.35481	0.182305	0.292982	0.338148
MT-ND1	25.145	1.09044	1.60146e-139	1.51789e-137	0.422168	AR2	1.12133	1.12368	0.980993	0.483559	0.761676	0.578242
HERPUD2	26.7027	1.0904	4.37378e-157	2.83071e-155	0.309323	ARPs	0.750823	0.401685	0.719115	0.505742	0.574547	0.56476
AC025159.1	17.3054	1.09014	4.28262e-67	1.46081e-65	0.306663	AR1	0.367189	0.44289	0.665032	0.346253	0.50958	0.460558
COL4A2	7.52321	1.08977	5.34489e-14	5.11629e-13	0.0768112	AR1	0.0859612	0.62519	0.174838	0.27778	0.344153	0.399114
PML	13.1119	1.08974	2.81635e-39	4.39097e-38	0.0880682	SVZCs	0.157446	0.158573	0.19172	0.0946676	0.114513	0.534407
HDAC2-AS2	19.9492	1.08952	1.52339e-88	5.07651e-87	0.183397	ARPs	0.449404	0.259331	0.488597	0.214801	0.31675	0.323364
PAPLN	33.597	1.0894	1.85409e-247	3.82847e-245	0.553471	AR2	1.54497	0.64102	1.23515	0.798464	1.27175	0.763686
AC106791.1	21.169	1.08921	1.84397e-99	7.13123e-98	0.199745	ARPs	0.595792	0.252071	0.476201	0.358011	0.474756	0.332137
PUDP	18.2295	1.08916	3.00903e-74	7.50958e-73	0.145698	SVZCs	0.28982	0.226734	0.367232	0.189437	0.36283	0.3274
NUDT7	7.93043	1.08898	2.18381e-15	1.7516e-14	0.0515422	SVZCs	0.102102	0.0492581	0.108618	0.0525323	0.107516	0.0711745
TMTC4	15.8293	1.08842	1.95507e-56	4.03698e-55	0.112216	SVZCs	0.196963	0.136104	0.25286	0.126897	0.141844	0.235112
AL591686.2	14.522	1.08712	8.78591e-48	1.59489e-46	0.130682	SVZCs	0.210106	0.0803288	0.347406	0.178585	0.324732	0.19462
LINC00158	7.82665	1.08697	5.01056e-15	3.37638e-14	0.054917	ARPs	0.12035	0.0630579	0.129506	0.0552467	0.0893758	0.0906047
ALDOC	25.1004	1.08688	4.92452e-139	2.77775e-137	0.249553	ARPs	0.881868	0.337758	0.617065	0.159922	0.371762	0.490183
ALDH1L1-AS2	8.87365	1.08671	7.07848e-19	6.50987e-18	0.0562094	SVZCs	0.11967	0.0735106	0.134767	0.0657197	0.128154	0.0673449
TBC1D10A	15.4125	1.08643	1.34907e-53	2.56434e-52	0.108812	ARPs	0.183643	0.130369	0.259045	0.0601933	0.187035	0.299902
ZNF107	16.1641	1.08635	9.03516e-59	1.90188e-57	0.129757	ARPs	0.27874	0.148774	0.293125	0.186807	0.207331	0.280313
CEP350	38.351	1.08591	0	0	0.665179	SVZCs	1.84695	1.00621	1.58776	1.04164	1.76356	1.35021
ZNF365	12.6029	1.08515	2.03631e-36	2.99574e-35	0.0943588	SVZCs	0.294277	0.134508	0.230462	0.115259	0.281327	0.14325
JAM2	21.2226	1.08507	5.90049e-100	3.61002e-98	0.256029	AR2	0.697886	0.461846	0.534835	0.506018	0.585161	0.287685
MT-ATP8	11.7128	1.08503	1.09648e-31	2.3465e-30	0.107917	AR2	0.15893	0.257493	0.221638	0.0994705	0.162762	0.11061
SCRG1	11.5971	1.08438	4.26051e-31	3.02244e-29	0.244251	WMAs	1.11532	0.196617	0.492681	0.217903	0.262567	0.4838
AC079142.1	26.3157	1.0843	1.2677e-152	5.63803e-151	0.310877	SVZCs	0.76774	0.489572	0.877912	0.508645	0.834374	0.798807
RGS11	9.37582	1.0842	6.86405e-21	3.38711e-19	0.153846	WMAs	0.367633	0.179288	0.290192	0.200362	0.147383	0.249313
TOX	33.5036	1.08415	4.2746e-246	2.9539e-244	0.581169	SVZCs	1.55797	0.946634	1.57164	1.02933	1.07197	0.974884
SLC6A11	23.6078	1.08333	3.20603e-123	1.5404e-121	0.19719	ARPs	0.480714	0.300805	0.555968	0.28529	1.45505	0.939886
LINC01572	16.4119	1.0827	1.57298e-60	4.88073e-59	0.211813	AR1	0.260821	0.250859	0.489288	0.468307	0.408472	0.335662
NTSR2	22.4517	1.08231	1.23072e-111	4.121e-110	0.190747	SVZCs	0.550972	0.223495	0.41888	0.219701	0.461901	0.339123
AP001172.1	14.1558	1.08214	1.71922e-45	2.74458e-44	0.123372	ARPs	0.287978	0.141583	0.279156	0.246275	0.163897	0.377644
KIAA1211	24.3505	1.08209	5.72473e-131	4.8914e-129	0.351523	AR2	0.835659	0.837313	0.822321	0.683801	1.49304	0.47163
RAPGEF3	26.5627	1.08162	1.83287e-155	8.34413e-154	0.251826	SVZCs	0.621666	0.531433	0.563335	0.305612	0.593941	0.497082
RABGAP1	39.2629	1.08144	0	0	0.656656	SVZCs	1.6299	0.894607	1.53201	0.998491	1.14247	1.28833
C10orf90	20.0623	1.08133	1.57666e-89	5.29472e-88	0.175734	ARPs	0.430631	0.245855	0.463581	0.279517	0.76623	0.282369
COX7B	16.6	1.08132	6.96982e-62	1.55188e-60	0.137931	ARPs	0.988916	0.164694	0.321232	0.163437	0.231695	0.362858
AC012459.1	9.6624	1.08126	4.35553e-22	3.75574e-21	0.0720307	ARPs	0.293967	0.0850799	0.172187	0.139059	0.194418	0.216847
FAM171A1	37.4667	1.08116	3.21724e-307	9.53899e-305	0.689647	AR2	1.45027	1.5531	1.57878	1.5181	1.62974	1.03647
LINC01578	28.8752	1.08077	2.44354e-183	1.90059e-181	0.402299	ARPs	1.12498	0.550369	0.936995	0.676791	0.773271	0.988785
AIFM3	16.7043	1.08074	1.2193e-62	2.75017e-61	0.118774	ARPs	0.221993	0.145662	0.286427	0.133989	0.180023	0.263522
AC125613.1	25.7094	1.08037	9.18303e-146	3.89914e-144	0.279424	SVZCs	0.480473	0.325234	0.662249	0.367507	0.497451	0.567431
AP003025.2	18.0424	1.08019	9.05467e-73	2.22455e-71	0.160106	SVZCs	0.342285	0.117141	0.362801	0.188015	0.173937	0.441247
MYO6	35.4835	1.08	8.84135e-276	1.1276e-273	0.661047	ARPs	1.81445	1.10672	1.66387	1.1117	1.32542	1.64978
AL353660.1	15.1987	1.07996	3.60926e-52	6.97912e-51	0.101258	SVZCs	0.21758	0.0672826	0.261884	0.132446	0.179765	0.0826798
NR1D2	25.0878	1.07889	6.76018e-139	6.30405e-137	0.328624	AR2	0.837355	0.400927	0.662652	0.679081	0.64731	0.36808
SDC2	27.3327	1.07861	1.73184e-164	1.17569e-162	0.355811	ARPs	1.14911	0.53347	0.911727	0.60599	0.741254	1.00126
AC023421.2	11.6573	1.07796	2.10521e-31	2.38503e-30	0.103959	ARPs	0.306641	0.126009	0.249589	0.264734	0.281619	0.0970268
ASF1A	12.291	1.07782	1.01246e-34	1.43414e-33	0.0852273	SVZCs	0.325785	0.0719599	0.177479	0.0880129	0.121648	0.117909
NTRK2	46.8971	1.07772	0	0	0.956395	AR2	3.22528	2.68243	3.25258	2.6792	3.2857	2.54762
CPED1	9.06179	1.07768	1.28325e-19	5.99947e-18	0.174465	WMAs	0.691496	0.04854	0.399396	0.0381428	0.209122	0.136772
BICC1	27.1837	1.0769	1.01123e-162	4.75979e-161	0.292614	SVZCs	0.849258	0.444978	0.836223	0.482353	0.617037	0.52653
HEG1	17.1211	1.07664	1.03328e-65	4.1777e-64	0.173691	AR2	0.425655	0.34391	0.35443	0.458235	0.300361	0.183721
EML4	21.751	1.07639	6.75711e-105	2.7577e-103	0.21175	ARPs	0.565442	0.266253	0.496711	0.285693	0.338303	0.568751
FRRS1L	13.8803	1.07623	8.34376e-44	1.28414e-42	0.0960409	ARPs	0.257065	0.121695	0.241268	0.199291	0.245137	0.243551
LINC02422	8.26254	1.07545	1.42603e-16	1.20363e-15	0.0511364	SVZCs	0.083653	0.0737235	0.117153	0.057305	0.0799058	0.0562838
SLC9B1	11.6394	1.07543	2.59925e-31	4.42001e-30	0.13762	AR1	0.142212	0.162032	0.279182	0.239771	0.227263	0.189048
ATP10B	18.2663	1.07535	1.53573e-74	6.92774e-73	0.239708	AR2	0.817229	0.412628	0.571001	0.374195	0.384639	0.311466
FAM66D	23.3758	1.07532	7.5269e-121	3.56705e-119	0.246743	ARPs	0.339485	0.299463	0.551406	0.325261	0.437133	0.47141
MERTK	34.9055	1.07511	6.13325e-267	1.48785e-264	0.634105	AR2	1.79747	0.456371	1.42938	0.566173	1.0951	0.919286
P2RY1	18.3673	1.0751	2.40246e-75	1.09516e-73	0.195615	AR2	0.355466	0.190271	0.391605	0.2716	0.220202	0.204995
ELMOD1	15.6888	1.07504	1.80422e-55	3.66872e-54	0.110187	SVZCs	0.323564	0.210716	0.270962	0.137782	0.421957	0.467134
S1PR1	16.0953	1.07487	2.75343e-58	5.79239e-57	0.125406	SVZCs	0.447428	0.132698	0.260228	0.13199	0.194715	0.179867
UQCR10	16.0655	1.07473	4.45169e-58	9.34235e-57	0.148945	SVZCs	0.746465	0.206578	0.332743	0.171791	0.157895	0.393887
TMEM126A	7.65477	1.0746	1.93664e-14	1.27263e-13	0.0523627	ARPs	0.342459	0.0561675	0.114829	0.0644433	0.0675755	0.112423
SHROOM2	18.6987	1.07448	5.07023e-78	1.31258e-76	0.130073	SVZCs	0.305394	0.124738	0.305936	0.156955	0.198274	0.180694
LINC00310	7.79643	1.0744	6.36838e-15	7.84793e-14	0.0708892	AR2	0.189768	0.0958458	0.136559	0.15329	0.117486	0.0671764
MAL	16.5677	1.07358	1.19206e-61	2.64741e-60	0.120817	ARPs	0.402532	0.150189	0.293465	0.0985317	0.220687	0.216344
ATP2B2	32.2328	1.07356	6.12245e-228	3.84065e-226	0.493506	SVZCs	1.07758	0.961968	1.1717	0.721914	1.28679	1.13573
CSDC2	13.2212	1.07356	6.61763e-40	1.04443e-38	0.0850244	SVZCs	0.272301	0.084583	0.201164	0.100637	0.15269	0.203738
ANP32E	14.7515	1.07351	3.00904e-49	5.22178e-48	0.122605	ARPs	0.320262	0.136178	0.267752	0.177123	0.180112	0.355732
RNF146	18.3108	1.07347	6.79226e-75	1.87598e-73	0.148659	ARPs	0.344539	0.170031	0.329339	0.195479	0.213886	0.341053
AL513217.1	7.21377	1.07307	5.44227e-13	4.99847e-12	0.0709921	AR1	0.0663344	0.0806079	0.134788	0.0457042	0.126513	0.124925
CCDC80	10.9356	1.07292	7.78743e-28	1.19587e-26	0.129473	AR1	0.129363	0.245309	0.255049	0.321636	0.203238	0.359858
USP53	26.9472	1.07289	6.1513e-160	4.05681e-158	0.357599	ARPs	0.836235	0.50806	0.872439	0.613178	1.0097	0.708531
BPNT1	8.43611	1.07281	3.28081e-17	2.3979e-16	0.0492976	ARPs	0.111963	0.0572771	0.116895	0.0606601	0.103287	0.0908022
AC006581.2	8.83113	1.07266	1.03622e-18	8.00229e-18	0.0625798	ARPs	0.170839	0.07458	0.150884	0.129276	0.110588	0.0967493
COL5A3	28.2212	1.07262	3.21066e-175	2.36471e-173	0.458493	ARPs	1.41513	0.77997	1.24841	0.511626	0.717933	0.940195
SLC25A33	23.1674	1.07251	9.70635e-119	7.3679e-117	0.289647	AR2	0.694071	0.433148	0.583614	0.705755	0.589644	0.319783
ARSF	7.50762	1.07237	6.02141e-14	3.8833e-13	0.049553	ARPs	0.112752	0.0585365	0.119355	0.0478532	0.113114	0.0408132
RIOK2	7.32964	1.07221	2.30773e-13	1.45264e-12	0.0444444	ARPs	0.141566	0.0505078	0.103394	0.0703861	0.0826202	0.121305
MT-CO2	27.9326	1.07149	1.07181e-171	1.35698e-169	0.595859	AR2	1.60754	1.88322	1.50416	0.886676	1.32014	0.980415
MFGE8	10.8538	1.07138	1.91286e-27	1.2109e-25	0.20222	WMAs	0.418552	0.0918801	0.414018	0.085799	0.218383	0.267872
WRN	27.759	1.07127	1.35815e-169	9.57609e-168	0.416347	ARPs	1.1006	0.593762	0.994617	0.724053	0.712986	1.01307
RHBDL3	6.97654	1.07115	3.02532e-12	2.69444e-11	0.103579	AR1	0.0930167	0.360931	0.186327	0.144574	0.39926	0.131797
SENP8	9.55455	1.07077	1.24118e-21	1.05222e-20	0.0664112	ARPs	0.112356	0.0732984	0.148204	0.0740462	0.114622	0.194916
POLR3F	9.13422	1.0705	6.58779e-20	5.27418e-19	0.0613027	ARPs	0.167751	0.0671951	0.136252	0.0927969	0.0968027	0.139655
SLC25A12	31.759	1.06997	2.38604e-221	1.45982e-219	0.430804	SVZCs	1.05122	0.62423	0.956245	0.567036	0.84372	0.992097
PTPRG	30.5407	1.06988	7.52575e-205	6.72856e-203	0.603831	ARPs	1.37362	1.10218	1.65269	0.793527	0.820416	1.58287
AC004253.1	7.15896	1.06961	8.12932e-13	5.00455e-12	0.0559387	ARPs	0.144765	0.0639121	0.129732	0.0901722	0.094852	0.215048
MYO6	40.2397	1.06929	0	0	0.692573	SVZCs	1.81445	1.10672	1.66387	1.1117	1.32542	1.64978
PHACTR1	33.7641	1.06879	6.64645e-250	7.31953e-248	0.717497	ARPs	1.97459	1.42241	2.02836	1.61264	1.11298	2.03194
AC090579.1	7.07871	1.06876	1.45504e-12	8.86622e-12	0.0590038	ARPs	0.112325	0.0686743	0.138992	0.104428	0.0817895	0.0935992
CTBS	13.8019	1.06805	2.48109e-43	3.78659e-42	0.10447	ARPs	0.261274	0.116355	0.230085	0.12024	0.168519	0.255108
AC021231.1	20.7971	1.06771	4.59315e-96	2.38171e-94	0.313937	AR1	0.384247	0.408454	0.684128	0.400544	0.621641	0.546263
TMEM126B	13.0673	1.0672	5.06496e-39	6.98067e-38	0.0996169	ARPs	0.479727	0.112365	0.22249	0.134992	0.14033	0.183724
MIR2052HG	9.18477	1.06679	4.12393e-20	1.97869e-18	0.161776	WMAs	0.185901	0.13067	0.42823	0.12979	0.227278	0.189511
S1PR1	15.0847	1.06664	2.04101e-51	3.70501e-50	0.118008	ARPs	0.447428	0.132698	0.260228	0.13199	0.194715	0.179867
NUDT3	23.2314	1.0666	2.19282e-119	7.80196e-118	0.22362	SVZCs	0.423689	0.348843	0.469623	0.251672	0.296331	0.571891
FBXO21	23.5113	1.06646	3.12424e-122	1.48669e-120	0.245211	ARPs	0.556385	0.304963	0.557769	0.384509	0.436011	0.541106
EFNA5	29.6116	1.06605	1.06094e-192	8.8471e-191	0.597446	ARPs	1.95899	1.14845	1.70627	1.29315	1.43986	1.53378
GCNA	7.57077	1.06597	3.71021e-14	4.41722e-13	0.064799	AR2	0.235963	0.125	0.125793	0.181994	0.118521	0.0620618
SGK3	34.4737	1.06592	1.98978e-260	2.34781e-258	0.687612	ARPs	1.95639	1.24411	1.81981	1.32432	1.38191	1.40825
ATP13A5	19.1954	1.0656	4.04222e-82	1.24533e-80	0.178033	ARPs	0.504072	0.237362	0.44515	0.214822	0.387623	0.27616
ZNF714	20.8791	1.06544	8.28874e-97	3.06869e-95	0.192848	ARPs	0.481994	0.237098	0.444663	0.293049	0.321784	0.398418
TMEM168	23.1439	1.06495	1.67626e-118	7.78441e-117	0.241379	ARPs	0.516977	0.295651	0.54214	0.335849	0.416219	0.622615
ARHGEF26-AS1	33.5798	1.06417	3.30763e-247	6.78945e-245	0.627771	AR2	1.70783	1.09669	1.48571	1.40301	1.53248	0.968766
SEMA4A	14.7619	1.06392	2.5788e-49	7.93778e-48	0.141778	AR2	0.220096	0.0788333	0.277134	0.0505174	0.136746	0.142152
METTL4	14.3905	1.06377	5.93792e-47	9.75776e-46	0.116731	ARPs	0.433424	0.130244	0.255252	0.232601	0.218862	0.228144
SELENOT	18.6008	1.06323	3.16465e-77	9.04298e-76	0.160409	ARPs	0.413596	0.188917	0.360826	0.251055	0.222479	0.30927
TADA1	8.63114	1.06321	6.0742e-18	4.55303e-17	0.0572158	ARPs	0.158084	0.0626949	0.126809	0.0758525	0.107959	0.123452
AC092802.1	20.7263	1.06311	2.00689e-95	6.01202e-94	0.185471	SVZCs	0.429275	0.158711	0.421494	0.223862	0.292483	0.349904
EYA2	35.1613	1.06284	7.80436e-271	1.92009e-268	0.625335	AR2	2.01061	1.33351	1.43661	1.27101	1.61915	0.930143
PIP4K2A	30.3861	1.06271	8.37894e-203	4.75721e-201	0.422687	SVZCs	0.907215	1.00222	1.02547	0.618513	0.975469	1.44958
IGSF10	8.55116	1.06144	1.21863e-17	5.2126e-16	0.149881	WMAs	0.507217	0.106304	0.321572	0.252642	0.166988	0.431071
FBLN1	17.9477	1.06125	5.00583e-72	1.21947e-70	0.14306	SVZCs	0.372997	0.195478	0.328001	0.170609	0.242758	0.175974
FOXG1-AS1	10.9598	1.06114	5.96212e-28	3.88771e-26	0.206979	WMAs	0.447337	0.220307	0.422777	0.331837	0.224886	0.282894
NME9	20.4181	1.06092	1.15395e-92	4.05168e-91	0.18825	ARPs	0.492206	0.252441	0.469439	0.478859	0.381188	0.345727
ZCCHC24	24.8937	1.06081	8.7028e-137	3.51047e-135	0.239448	SVZCs	0.442838	0.472407	0.541456	0.295968	0.401843	0.844133
AC046158.1	7.41439	1.06073	1.22189e-13	7.76897e-13	0.0590038	ARPs	0.116317	0.0678084	0.136586	0.15823	0.083318	0.181997
LYPLAL1-DT	15.9633	1.06031	2.30396e-57	4.70975e-56	0.143295	ARPs	0.270108	0.192013	0.365646	0.224155	0.344876	0.252075
AC012085.2	11.9835	1.0603	4.33548e-33	5.16831e-32	0.114943	ARPs	0.336125	0.138832	0.270466	0.255114	0.207731	0.368545
[truncated: 5,192 more rows]

## Sheet: Extended_Data_Table_3_AR1_marke
names	scores	logfoldchanges	pvals	pvals_adj	pct_nz_group	AR1 vs:	weighted_expr_AR1	weighted_expr_ARPs	weighted_expr_A0	weighted_expr_SVZCs	weighted_expr_WMAs	weighted_expr_AR2
G0S2	10.5341	7.29726	6.01351e-26	8.35103e-25	0.00146163	AR2	0.185189	0.0164808	0.013626	0.105313	0.00824268	0.00129263
TNNT1	15.3255	6.46742	5.16613e-53	9.87945e-52	0.00344968	SVZCs	0.272949	0.00584987	0.0632063	0.00354033	0.0128813	0.0477866
CABLES1	73.3957	6.25409	0	0	0.0882711	SVZCs	2.60167	0.407327	2.47521	0.151512	2.33226	2.07489
HSPA6	11.528	5.97622	9.53717e-31	1.5952e-29	0.124527	A0	0.185626	0.0261126	0.0032348	0.13157	0.0103578	0.00719691
LINC00839	7.45357	5.82452	9.08453e-14	1.15564e-12	0.00396511	WMAs	0.1497	0.0072898	0.0930082	0.00721569	0.00284552	0.0855961
WIF1	41.6483	5.76019	0	0	0.0199234	ARPs	0.912277	0.0271199	0.919234	0.0723141	0.0342559	0.51746
TNNT1	14.46	5.74123	2.16768e-47	2.93394e-46	0.00485313	ARPs	0.272949	0.00584987	0.0632063	0.00354033	0.0128813	0.0477866
SEL1L3	50.5581	5.72736	0	0	0.028612	SVZCs	1.04101	0.0411628	0.561565	0.0339966	0.0495617	0.572198
TMEM100	12.2754	5.63325	1.22821e-34	1.29582e-33	0.00408685	ARPs	0.182345	0.00402199	0.0742827	0.00608438	0.0786398	0.0173617
GRM3	67.8425	5.51915	0	0	0.0949675	SVZCs	1.94749	0.176246	1.90596	0.12317	0.272449	1.2617
SEL1L3	47.7348	5.44621	0	0	0.0339719	ARPs	1.04101	0.0411628	0.561565	0.0339966	0.0495617	0.572198
WIF1	29.2765	5.41802	2.06333e-188	8.13375e-186	0.0317209	WMAs	0.912277	0.0271199	0.919234	0.0723141	0.0342559	0.51746
AC068308.1	48.0665	5.2678	0	0	0.0431673	ARPs	1.24841	0.0625002	1.12481	0.0823496	0.161604	0.630698
ZNF676	11.5023	5.2281	1.28374e-30	1.54199e-29	0.00507305	SVZCs	0.174671	0.0134271	0.121697	0.00507906	0.028121	0.138024
SEL1L3	33.6357	5.17222	5.03906e-248	4.60013e-245	0.0444092	WMAs	1.04101	0.0411628	0.561565	0.0339966	0.0495617	0.572198
AL031710.1	8.3809	5.15842	5.2526e-17	3.55052e-16	0.00357599	ARPs	0.122595	0.00364533	0.0338774	0.00529542	0.0087769	0.0204221
GJB6	33.9745	5.12753	5.30275e-253	5.24081e-251	0.0184659	SVZCs	0.525419	0.0325059	0.391214	0.0195787	0.27309	0.259212
POU3F1	9.19308	5.08429	3.81739e-20	3.39378e-19	0.0036526	SVZCs	0.126736	0.0127813	0.104698	0.00397485	0.0475902	0.0835608
HGD	13.4672	5.06301	2.43878e-41	3.72693e-40	0.00730519	SVZCs	0.226203	0.0108185	0.0733045	0.00756456	0.0143625	0.0617062
TMEM100	12.7213	5.03456	4.50197e-37	6.27959e-36	0.00669643	SVZCs	0.182345	0.00402199	0.0742827	0.00608438	0.0786398	0.0173617
GRM3	62.9134	4.96296	0	0	0.122095	ARPs	1.94749	0.176246	1.90596	0.12317	0.272449	1.2617
AC005009.2	24.6111	4.93956	9.60022e-134	4.39936e-132	0.0135958	SVZCs	0.376669	0.018616	0.259939	0.014796	0.0478368	0.224867
AC068308.1	49.7153	4.8554	0	0	0.0578328	SVZCs	1.24841	0.0625002	1.12481	0.0823496	0.161604	0.630698
HSPA6	8.90226	4.81966	5.47218e-19	6.12948e-18	0.00584653	AR2	0.185626	0.0261126	0.0032348	0.13157	0.0103578	0.00719691
ARHGAP24	50.9109	4.79174	0	0	0.0793425	SVZCs	1.43493	0.34167	1.64406	0.109308	0.883161	1.56733
CRYAB	64.2231	4.78766	0	0	0.300853	AR2	2.67023	1.24654	0.459103	1.72805	0.916091	0.39657
TMPRSS3	10.1716	4.75403	2.65384e-24	2.68872e-23	0.00507305	SVZCs	0.12778	0.00997254	0.108021	0.00503855	0.0564837	0.208995
CXCL14	21.537	4.70158	7.0092e-103	2.47103e-101	0.0115666	SVZCs	0.319721	0.0568206	0.380834	0.0143749	0.0952953	0.439939
GRID2	58.7259	4.68473	0	0	0.188515	SVZCs	2.25906	0.682851	2.43339	0.28772	2.25762	1.90409
CPED1	34.3646	4.68008	8.52884e-259	8.72759e-257	0.0300325	SVZCs	0.691496	0.04854	0.399396	0.0381428	0.209122	0.136772
CABLES1	64.431	4.63422	0	0	0.204598	ARPs	2.60167	0.407327	2.47521	0.151512	2.33226	2.07489
G0S2	7.10102	4.61943	1.23841e-12	1.47124e-11	0.00713719	WMAs	0.185189	0.0164808	0.013626	0.105313	0.00824268	0.00129263
AL031710.1	8.74179	4.61853	2.29442e-18	1.9193e-17	0.00446429	SVZCs	0.122595	0.00364533	0.0338774	0.00529542	0.0087769	0.0204221
SNCG	18.0117	4.61295	1.57637e-72	4.00324e-71	0.0119724	SVZCs	0.279746	0.0358252	0.128664	0.0131051	0.036059	0.172714
AC005009.2	23.1641	4.60546	1.0493e-118	3.62191e-117	0.0166028	ARPs	0.376669	0.018616	0.259939	0.014796	0.0478368	0.224867
APOC1	46.9097	4.60266	0	0	0.065138	SVZCs	1.11967	0.137762	0.536763	0.0815286	0.232715	0.788384
TNNT1	9.80089	4.59735	1.11598e-22	2.22491e-21	0.0150674	WMAs	0.272949	0.00584987	0.0632063	0.00354033	0.0128813	0.0477866
HGD	12.6516	4.54448	1.09598e-36	1.20658e-35	0.0091954	ARPs	0.226203	0.0108185	0.0733045	0.00756456	0.0143625	0.0617062
SLIT1	40.8636	4.53591	0	0	0.0444399	SVZCs	0.822204	0.0574507	0.660194	0.053526	0.175799	0.799394
LINC00645	15.7263	4.52988	9.98053e-56	1.56663e-54	0.0153257	ARPs	0.378589	0.0197264	0.252754	0.0296441	0.279348	0.0892893
CRYAB	80.3528	4.5281	0	0	0.945301	A0	2.67023	1.24654	0.459103	1.72805	0.916091	0.39657
LINC00839	10.8594	4.47891	1.80025e-27	1.99906e-26	0.00588474	SVZCs	0.1497	0.0072898	0.0930082	0.00721569	0.00284552	0.0855961
LINC00839	10.2516	4.46412	1.16425e-24	9.70861e-24	0.00715198	ARPs	0.1497	0.0072898	0.0930082	0.00721569	0.00284552	0.0855961
DIO3OS	11.022	4.45889	2.9924e-28	3.39347e-27	0.00649351	SVZCs	0.157901	0.0233482	0.166894	0.00774781	0.0484244	0.37005
CRYM	14.1257	4.45708	2.63737e-45	1.08917e-43	0.0198255	WMAs	0.364394	0.0320794	0.151983	0.0363133	0.0198187	0.124941
ACPP	12.4669	4.43393	1.13166e-35	1.99074e-34	0.0121803	AR2	0.233301	0.055703	0.0377903	0.138818	0.0684547	0.0120834
SLIT1	38.6726	4.43096	0	0	0.0464879	ARPs	0.822204	0.0574507	0.660194	0.053526	0.175799	0.799394
GJB6	31.5965	4.38675	4.12991e-219	3.47734e-217	0.0260536	ARPs	0.525419	0.0325059	0.391214	0.0195787	0.27309	0.259212
FABP7	9.34499	4.37931	9.18997e-21	1.69394e-19	0.0158604	WMAs	0.250187	0.0367929	0.0542968	0.0444278	0.0135666	0.0581237
FGL1	15.0776	4.33647	2.27243e-51	4.18866e-50	0.012987	SVZCs	0.240879	0.020279	0.237646	0.0133917	0.0275411	0.0748653
CPED1	32.1692	4.32476	4.76202e-227	4.19275e-225	0.0360153	ARPs	0.691496	0.04854	0.399396	0.0381428	0.209122	0.136772
WIF1	41.5508	4.3124	0	0	0.0499188	SVZCs	0.912277	0.0271199	0.919234	0.0723141	0.0342559	0.51746
GRM3	42.8828	4.26258	0	0	0.18636	WMAs	1.94749	0.176246	1.90596	0.12317	0.272449	1.2617
SPRY4	9.7424	4.22042	1.98803e-22	1.89724e-21	0.00811688	SVZCs	0.124914	0.0306271	0.0760223	0.00711212	0.0399977	0.144613
HSPH1	80.204	4.21728	0	0	0.930172	A0	2.32298	0.613806	0.402081	1.48794	0.595241	0.444792
SLC10A1	11.2407	4.20367	2.5743e-29	2.40513e-28	0.010728	ARPs	0.165743	0.0097359	0.0403548	0.0364247	0.0192148	0.0363557
TMEM241	58.4159	4.18707	0	0	0.123377	SVZCs	1.39093	0.202638	1.17248	0.153337	0.778983	1.22707
ATP5F1E	61.0573	4.15728	0	0	0.214286	SVZCs	1.88434	0.328898	0.589614	0.272195	0.362225	0.49666
ZNF98	52.7964	4.14767	0	0	0.118101	SVZCs	1.60289	0.565627	1.64436	0.20199	0.691382	1.43473
NRP1	20.0643	4.14465	1.51461e-89	4.6704e-88	0.0174513	SVZCs	0.317863	0.16881	0.680737	0.020935	0.0786286	1.30623
COPS9	37.8454	4.13655	0	0	0.177637	WMAs	1.51683	0.207461	0.46032	0.186992	0.184218	0.426004
HGD	8.71113	4.13312	3.00848e-18	4.94383e-17	0.0150674	WMAs	0.226203	0.0108185	0.0733045	0.00756456	0.0143625	0.0617062
FOXJ1	7.57949	4.12267	3.46918e-14	3.25171e-13	0.00682095	AR2	0.111828	0.02166	0.0170508	0.0818676	0.020115	0.00676925
COPS9	55.744	4.11292	0	0	0.155641	SVZCs	1.51683	0.207461	0.46032	0.186992	0.184218	0.426004
AL121894.3	6.79482	4.10587	1.08451e-11	6.96698e-11	0.00527597	SVZCs	0.0835208	0.00993702	0.0768022	0.00504628	0.0280607	0.0311283
TRIM29	6.85513	4.07914	7.12462e-12	4.02071e-11	0.00613027	ARPs	0.0905467	0.00559146	0.0813788	0.00606288	0.00708122	0.0705863
TMEM132C	45.7826	4.06684	0	0	0.0752841	SVZCs	1.114	0.138313	1.44668	0.115216	0.131522	0.998202
HSPH1	62.3708	4.03866	0	0	0.353715	AR2	2.32298	0.613806	0.402081	1.48794	0.595241	0.444792
GABRA4	34.7771	3.99873	5.39528e-265	5.67158e-263	0.0409903	SVZCs	0.64525	0.0565746	0.605828	0.0551546	0.0813952	0.847045
TRIM29	7.23687	3.96202	4.59166e-13	3.14233e-12	0.00568182	SVZCs	0.0905467	0.00559146	0.0813788	0.00606288	0.00708122	0.0705863
GABRA4	33.0104	3.96102	5.76469e-239	5.46386e-237	0.0416347	ARPs	0.64525	0.0565746	0.605828	0.0551546	0.0813952	0.847045
AC091885.2	19.7019	3.95234	2.07598e-86	4.96661e-85	0.0232439	ARPs	0.336432	0.0255078	0.195866	0.0896933	0.100077	0.146224
COPS9	52.2467	3.94781	0	0	0.165262	ARPs	1.51683	0.207461	0.46032	0.186992	0.184218	0.426004
LINC00645	15.9286	3.93508	4.0149e-57	8.26568e-56	0.0239448	SVZCs	0.378589	0.0197264	0.252754	0.0296441	0.279348	0.0892893
SLC13A5	9.23512	3.90779	2.57996e-20	2.31024e-19	0.00892857	SVZCs	0.132679	0.0116653	0.174039	0.0094086	0.0857841	0.171602
G0S2	12.2125	3.89036	2.66604e-34	4.89856e-33	0.141984	A0	0.185189	0.0164808	0.013626	0.105313	0.00824268	0.00129263
NDUFB4	52.5098	3.89022	0	0	0.163729	ARPs	1.43574	0.195565	0.388975	0.241361	0.225279	0.342875
TMEM132C	30.3617	3.86388	1.76156e-202	7.93616e-200	0.0872324	WMAs	1.114	0.138313	1.44668	0.115216	0.131522	0.998202
SH3BGR	44.9828	3.86166	0	0	0.131547	AR2	1.11595	0.428923	0.293313	0.816928	0.320424	0.13207
ZSCAN31	12.061	3.86013	1.69623e-33	1.75649e-32	0.0206897	ARPs	0.304674	0.0242317	0.138784	0.0353257	0.0390965	0.0652865
ADGRV1	42.327	3.84417	0	0	0.549564	WMAs	4.2535	2.81577	4.18414	2.87645	1.76282	4.02428
ATP5F1E	56.2805	3.84133	0	0	0.244444	ARPs	1.88434	0.328898	0.589614	0.272195	0.362225	0.49666
AC068308.1	31.3086	3.82444	3.56e-215	2.02453e-212	0.113402	WMAs	1.24841	0.0625002	1.12481	0.0823496	0.161604	0.630698
ZNF676	10.3541	3.81956	4.00736e-25	3.38072e-24	0.0130268	ARPs	0.174671	0.0134271	0.121697	0.00507906	0.028121	0.138024
NDUFB3	37.9684	3.81819	0	0	0.0720307	ARPs	0.811642	0.0850132	0.184871	0.0943476	0.122392	0.196601
CCBE1	20.5853	3.81136	3.71756e-94	1.20978e-92	0.0298295	SVZCs	0.453149	0.041929	0.247892	0.0400219	0.0536538	0.279974
APOC1	42.011	3.80456	0	0	0.107024	ARPs	1.11967	0.137762	0.536763	0.0815286	0.232715	0.788384
TMEM132C	42.5172	3.78624	0	0	0.0888889	ARPs	1.114	0.138313	1.44668	0.115216	0.131522	0.998202
HSPA1A	76.4064	3.78355	0	0	0.949665	A0	2.29875	1.30812	0.501245	1.86182	1.39193	0.610147
AP000229.1	14.5071	3.76727	1.09292e-47	2.44761e-46	0.0199756	AR2	0.223306	0.0475925	0.0478747	0.141746	0.112808	0.0182084
TMPRSS3	9.34759	3.76552	8.96635e-21	6.7267e-20	0.0091954	ARPs	0.12778	0.00997254	0.108021	0.00503855	0.0564837	0.208995
CRYM	19.4606	3.75341	2.36847e-84	5.49948e-83	0.0234994	ARPs	0.364394	0.0320794	0.151983	0.0363133	0.0198187	0.124941
PLEKHG4B	6.92168	3.74852	4.46316e-12	3.80317e-11	0.0090134	AR2	0.115725	0.0200216	0.00949825	0.0634045	0.0105487	0.00908668
TMEM241	53.4755	3.74825	0	0	0.1553	ARPs	1.39093	0.202638	1.17248	0.153337	0.778983	1.22707
CCBE1	19.5825	3.74282	2.17859e-85	5.14468e-84	0.0286079	ARPs	0.453149	0.041929	0.247892	0.0400219	0.0536538	0.279974
TRIB1	9.32461	3.74255	1.11397e-20	1.00976e-19	0.00913149	SVZCs	0.12502	0.0174577	0.136393	0.00990005	0.0329131	0.0861457
FGL1	14.0199	3.73284	1.17726e-44	1.51931e-43	0.0166028	ARPs	0.240879	0.020279	0.237646	0.0133917	0.0275411	0.0748653
AC245407.2	9.68311	3.72467	3.55723e-22	4.42137e-21	0.0133983	AR2	0.150826	0.0184209	0.0293567	0.0322044	0.0292129	0.0122388
COX7A1	11.8936	3.72255	1.2771e-32	3.71042e-31	0.0269627	WMAs	0.370069	0.0356687	0.0732655	0.0377197	0.0333621	0.0796119
HSPE1	73.6407	3.71163	0	0	0.909514	A0	1.89715	0.464732	0.359453	1.05435	0.47051	0.43764
AC009951.6	12.5385	3.70919	4.59571e-36	5.00079e-35	0.0155811	ARPs	0.198193	0.0166205	0.0376705	0.0226583	0.0198893	0.0217207
PLEKHG4B	8.60852	3.68432	7.40074e-18	8.39266e-17	0.101251	A0	0.115725	0.0200216	0.00949825	0.0634045	0.0105487	0.00908668
ATP5F1E	39.4496	3.67666	0	0	0.298969	WMAs	1.88434	0.328898	0.589614	0.272195	0.362225	0.49666
AL445259.1	45.2383	3.67507	0	0	0.120051	ARPs	1.11848	0.149531	0.726084	0.244711	0.455353	0.375035
NDUFB4	36.586	3.66397	4.78196e-293	7.54029e-290	0.219667	WMAs	1.43574	0.195565	0.388975	0.241361	0.225279	0.342875
SIX3-AS1	10.2781	3.6634	8.84552e-25	7.39935e-24	0.0132822	ARPs	0.166863	0.0142302	0.0521473	0.0395938	0.023533	0.0629633
OAF	41.415	3.66296	0	0	0.0775162	SVZCs	0.744673	0.148589	0.788908	0.0836946	0.146769	0.760776
NDUFB3	39.3234	3.66105	0	0	0.0866477	SVZCs	0.811642	0.0850132	0.184871	0.0943476	0.122392	0.196601
LINC00499	49.2234	3.65647	0	0	0.201705	SVZCs	2.10579	0.631415	2.20259	0.452389	1.10097	1.21809
RUBCNL	20.0733	3.64825	1.264e-89	3.91151e-88	0.0239448	SVZCs	0.291896	0.0730275	0.246612	0.0266757	0.193382	0.254496
UQCRB	53.8925	3.64432	0	0	0.203328	SVZCs	1.51238	0.253328	0.553064	0.249132	0.463208	0.380487
ETV1	42.1782	3.64077	0	0	0.080763	SVZCs	0.819894	0.165658	0.631543	0.0969797	0.396592	0.587
BOLA3	28.3878	3.63297	2.86445e-177	1.73417e-175	0.0489042	SVZCs	0.502428	0.0708897	0.121914	0.0512764	0.0833591	0.113198
SLC7A10	17.8281	3.62536	4.27934e-71	1.06876e-69	0.0213068	SVZCs	0.256129	0.0469876	0.278849	0.0233794	0.182818	0.197936
COX7A1	16.5655	3.62443	1.2367e-61	2.14184e-60	0.0301405	ARPs	0.370069	0.0356687	0.0732655	0.0377197	0.0333621	0.0796119
UQCRB	51.0121	3.61706	0	0	0.195658	ARPs	1.51238	0.253328	0.553064	0.249132	0.463208	0.380487
G0S2	9.55061	3.61388	1.28939e-21	9.88263e-21	0.0132822	ARPs	0.185189	0.0164808	0.013626	0.105313	0.00824268	0.00129263
AC097518.2	40.6206	3.60261	0	0	0.100383	ARPs	1.18161	0.170597	1.53105	0.442181	0.910018	0.754396
SLC13A5	8.6939	3.59599	3.50221e-18	2.43959e-17	0.00996169	ARPs	0.132679	0.0116653	0.174039	0.0094086	0.0857841	0.171602
ZNF728	8.82939	3.57897	1.05247e-18	8.92674e-18	0.0113636	SVZCs	0.122252	0.017119	0.103692	0.0108229	0.0585323	0.117006
ASNS	15.8643	3.57536	1.11983e-56	3.25078e-55	0.188827	A0	0.208554	0.0299264	0.0192669	0.0411361	0.0209083	0.0204584
CRYM	20.0759	3.57148	1.19857e-89	3.71236e-88	0.0292208	SVZCs	0.364394	0.0320794	0.151983	0.0363133	0.0198187	0.124941
AP000462.1	41.9605	3.57067	0	0	0.105236	ARPs	0.960824	0.12736	0.674225	0.236672	0.256144	1.01834
FSTL5	54.5438	3.56385	0	0	0.247765	ARPs	1.99019	0.427989	1.68162	1.22388	1.25772	1.23046
TMA7	51.4106	3.55571	0	0	0.192979	SVZCs	1.39436	0.240694	0.427373	0.229426	0.341082	0.386674
NDUFB4	53.4418	3.55243	0	0	0.211039	SVZCs	1.43574	0.195565	0.388975	0.241361	0.225279	0.342875
RANBP17	9.21097	3.55183	3.23182e-20	2.88279e-19	0.0150162	SVZCs	0.1685	0.0235174	0.228987	0.0155281	0.0780137	0.286102
OXTR	10.8353	3.54692	2.34315e-27	2.59361e-26	0.0144075	SVZCs	0.161713	0.0257356	0.127834	0.0149061	0.254278	0.272758
COX7A1	17.2511	3.54228	1.09805e-66	2.59302e-65	0.0328734	SVZCs	0.370069	0.0356687	0.0732655	0.0377197	0.0333621	0.0796119
PTN	51.5628	3.53866	0	0	0.150162	SVZCs	1.24548	0.308238	1.2818	0.193049	0.540914	1.16389
LHX2	30.7249	3.53369	2.64349e-207	1.29158e-204	0.104679	WMAs	0.89128	0.274934	0.593875	0.275323	0.117063	0.380651
ADRA1B	9.65574	3.53066	4.64771e-22	4.38361e-21	0.0107549	SVZCs	0.1491	0.0245742	0.138423	0.0138171	0.0190891	0.243183
KCNQ3	28.3354	3.52211	1.26707e-176	7.60463e-175	0.0582386	SVZCs	0.652405	0.131043	0.810665	0.0770479	0.372132	1.26274
COMMD6	39.7654	3.52176	0	0	0.101149	ARPs	0.887281	0.117226	0.249787	0.145572	0.149657	0.206443
COX6C	47.0751	3.51863	0	0	0.161175	ARPs	1.24018	0.194182	0.33669	0.229858	0.290751	0.328991
ATP5PF	50.7962	3.51455	0	0	0.205364	ARPs	1.46811	0.256457	0.461225	0.286211	0.31335	0.387876
TMEM100	11.3891	3.51368	4.73836e-30	7.34467e-29	0.0180268	AR2	0.182345	0.00402199	0.0742827	0.00608438	0.0786398	0.0173617
SERPINH1	34.9282	3.51357	2.77136e-267	5.34102e-265	0.425953	A0	0.537619	0.253079	0.0604712	0.540263	0.127545	0.1008
HSPH1	40.9481	3.50043	0	0	0.421094	WMAs	2.32298	0.613806	0.402081	1.48794	0.595241	0.444792
RERG	27.0575	3.49253	3.11424e-161	1.61243e-159	0.0546616	ARPs	0.606992	0.0715563	0.797368	0.0811374	0.0910406	0.528704
NDUFA12	40.9927	3.4922	0	0	0.11341	ARPs	0.943855	0.130598	0.283133	0.173869	0.20263	0.244018
HSPB1	74.8805	3.49089	0	0	0.940355	A0	2.10876	1.34622	0.497015	1.81872	1.18058	0.650573
ASNS	12.6893	3.48793	6.77864e-37	1.22283e-35	0.0199756	AR2	0.208554	0.0299264	0.0192669	0.0411361	0.0209083	0.0204584
RPL36AL	34.974	3.4814	5.59411e-268	5.95275e-266	0.0793425	SVZCs	0.706282	0.0967316	0.184059	0.087922	0.138406	0.19403
ATP5MD	51.5323	3.48135	0	0	0.204951	SVZCs	1.39594	0.275852	0.449328	0.240658	0.325702	0.413933
TMA7	48.396	3.47809	0	0	0.191826	ARPs	1.39436	0.240694	0.427373	0.229426	0.341082	0.386674
HSPA1B	67.1821	3.47055	0	0	0.833576	A0	1.3954	0.839406	0.24211	1.22441	0.818354	0.330783
MOXD1	18.3724	3.467	2.18432e-75	1.69517e-73	0.0634417	WMAs	0.658211	0.433235	0.529894	0.49814	0.0808643	0.410397
MRPL51	24.5687	3.46049	2.72996e-133	5.63705e-131	0.0888184	WMAs	0.726069	0.0963362	0.180034	0.114438	0.0925092	0.162608
DACH1	21.7778	3.45954	3.76884e-105	4.80666e-103	0.0959556	WMAs	0.812278	0.174157	0.681224	0.206637	0.107871	0.491671
COX7C	52.7566	3.4582	0	0	0.215706	SVZCs	1.46423	0.282724	0.501294	0.264255	0.372695	0.466115
ASNS	8.75908	3.45622	1.96858e-18	3.26123e-17	0.0237906	WMAs	0.208554	0.0299264	0.0192669	0.0411361	0.0209083	0.0204584
AL354863.1	12.635	3.44972	1.35427e-36	1.86947e-35	0.0158279	SVZCs	0.175494	0.0236569	0.126618	0.017405	0.0258301	0.0491025
AC009951.6	8.62749	3.4478	6.2715e-18	1.01331e-16	0.0214116	WMAs	0.198193	0.0166205	0.0376705	0.0226583	0.0198893	0.0217207
HSPH1	56.1034	3.44138	0	0	0.371648	ARPs	2.32298	0.613806	0.402081	1.48794	0.595241	0.444792
MT3	63.4907	3.42823	0	0	0.57082	SVZCs	2.87243	1.2776	1.75908	0.935902	1.36435	1.70464
DYNLL1	39.3227	3.42499	0	0	0.391753	WMAs	2.01247	0.482091	0.654921	0.563126	0.472181	0.553773
EPHA4	25.8983	3.42388	6.95807e-148	1.8286e-145	0.0848533	WMAs	0.773505	0.138411	0.862971	0.170073	0.103252	0.507195
GABRA4	22.3761	3.41812	6.72988e-111	9.33838e-109	0.0674068	WMAs	0.64525	0.0565746	0.605828	0.0551546	0.0813952	0.847045
HSPA1A	56.8402	3.41412	0	0	0.409501	AR2	2.29875	1.30812	0.501245	1.86182	1.39193	0.610147
NRXN1	63.5465	3.41184	0	0	0.660308	SVZCs	4.13812	2.37303	4.26992	1.9163	3.57449	3.65921
TXN	23.8859	3.40316	4.29193e-126	7.87763e-124	0.0975416	WMAs	0.725055	0.135256	0.17259	0.147192	0.0959051	0.170218
MRPL51	34.5629	3.39921	9.1084e-262	1.01598e-259	0.0827586	ARPs	0.726069	0.0963362	0.180034	0.114438	0.0925092	0.162608
POU3F1	8.26631	3.39288	1.38166e-16	9.22791e-16	0.00970626	ARPs	0.126736	0.0127813	0.104698	0.00397485	0.0475902	0.0835608
DYNLL1	54.6636	3.38731	0	0	0.350958	ARPs	2.01247	0.482091	0.654921	0.563126	0.472181	0.553773
CCBE1	13.3684	3.37856	9.24682e-41	3.4161e-39	0.0404441	WMAs	0.453149	0.041929	0.247892	0.0400219	0.0536538	0.279974
HSPE1	55.2489	3.36755	0	0	0.341535	AR2	1.89715	0.464732	0.359453	1.05435	0.47051	0.43764
COX7C	49.3156	3.34681	0	0	0.215581	ARPs	1.46423	0.282724	0.501294	0.264255	0.372695	0.466115
ARHGAP29	18.4944	3.34494	2.29166e-76	6.08712e-75	0.0316558	SVZCs	0.31597	0.0891611	0.301969	0.0359181	0.108553	0.385887
RPL36AL	32.8866	3.33718	3.41984e-237	3.18054e-235	0.0807152	ARPs	0.706282	0.0967316	0.184059	0.087922	0.138406	0.19403
ATP5PF	52.3393	3.33375	0	0	0.245536	SVZCs	1.46811	0.256457	0.461225	0.286211	0.31335	0.387876
CHI3L1	29.3545	3.3317	2.09393e-189	1.40229e-187	0.0691964	SVZCs	0.686185	0.913106	0.68118	0.093442	0.440589	2.43744
UNC5C	44.276	3.33166	0	0	0.134537	SVZCs	1.08268	0.225527	1.05817	0.177263	0.452321	1.36481
AC009951.6	12.2915	3.31939	1.00656e-34	1.73892e-33	0.0209501	AR2	0.198193	0.0166205	0.0376705	0.0226583	0.0198893	0.0217207
NOP10	17.2638	3.3121	8.80982e-67	1.64573e-65	0.0309068	ARPs	0.30952	0.0358738	0.0634079	0.0441103	0.0364418	0.0798274
PLCG2	57.6099	3.30967	0	0	0.7106	ARPs	3.57539	1.50418	2.21859	1.96855	1.97373	1.63696
ZSCAN31	11.9295	3.30827	8.30735e-33	1.05176e-31	0.03125	SVZCs	0.304674	0.0242317	0.138784	0.0353257	0.0390965	0.0652865
RERG	28.0063	3.30425	1.36179e-172	7.9933e-171	0.0590503	SVZCs	0.606992	0.0715563	0.797368	0.0811374	0.0910406	0.528704
LINC00498	11.1742	3.3023	5.45439e-29	5.05106e-28	0.0181354	ARPs	0.180978	0.019911	0.137317	0.0275134	0.0431126	0.0884225
AL121820.2	17.412	3.29678	6.69287e-68	1.27359e-66	0.0309068	ARPs	0.29036	0.0337089	0.136548	0.0804919	0.0682216	0.118277
NLGN4X	47.1132	3.29273	0	0	0.145495	SVZCs	1.19958	0.42363	1.10903	0.212377	0.593615	1.25547
NOP10	12.0515	3.28903	1.90372e-33	5.68332e-32	0.036479	WMAs	0.30952	0.0358738	0.0634079	0.0441103	0.0364418	0.0798274
FGL1	9.49278	3.28598	2.24953e-21	4.2783e-20	0.0261697	WMAs	0.240879	0.020279	0.237646	0.0133917	0.0275411	0.0748653
CSTB	31.8208	3.2855	3.33617e-222	2.14318e-219	0.187946	WMAs	1.20723	0.261217	0.336586	0.262194	0.215447	0.387066
H2AFZ	14.2525	3.27718	4.32649e-46	1.82586e-44	0.0507534	WMAs	0.394084	0.0878527	0.0967186	0.128427	0.0486229	0.120375
NDUFB3	25.3761	3.265	4.63589e-142	1.08661e-139	0.114988	WMAs	0.811642	0.0850132	0.184871	0.0943476	0.122392	0.196601
HSPE1	53.206	3.25989	0	0	0.323372	ARPs	1.89715	0.464732	0.359453	1.05435	0.47051	0.43764
ADAMTS17	48.6905	3.25806	0	0	0.201022	ARPs	1.46389	0.298114	1.34097	0.356734	0.473552	1.13102
ATP5MD	47.4906	3.25796	0	0	0.214815	ARPs	1.39594	0.275852	0.449328	0.240658	0.325702	0.413933
AC009951.6	12.7855	3.25775	1.97478e-37	2.78251e-36	0.0204951	SVZCs	0.198193	0.0166205	0.0376705	0.0226583	0.0198893	0.0217207
SH3RF1	51.915	3.25506	0	0	0.20556	SVZCs	1.38157	0.338257	1.12898	0.27175	0.729764	0.837946
COX7B	42.7109	3.24928	0	0	0.145698	SVZCs	0.988916	0.164694	0.321232	0.163437	0.231695	0.362858
COX6C	47.8595	3.24866	0	0	0.200284	SVZCs	1.24018	0.194182	0.33669	0.229858	0.290751	0.328991
AL356737.2	35.1776	3.24121	4.40483e-271	5.26909e-269	0.091954	ARPs	0.754955	0.11265	0.759712	0.14212	0.359974	1.02343
JDP2	45.7449	3.23986	0	0	0.170037	AR2	1.08045	0.481806	0.337106	0.707408	0.390806	0.187304
SCRG1	44.4784	3.23839	0	0	0.161941	ARPs	1.11532	0.196617	0.492681	0.217903	0.262567	0.4838
HSPE1	38.1493	3.23757	0	0	0.375099	WMAs	1.89715	0.464732	0.359453	1.05435	0.47051	0.43764
COX7B	40.5748	3.2373	0	0	0.137931	ARPs	0.988916	0.164694	0.321232	0.163437	0.231695	0.362858
PARD6G-AS1	35.9666	3.23072	2.78062e-283	5.51198e-281	0.102314	AR2	0.717947	0.15591	0.141764	0.39951	0.141666	0.106049
SMIM20	29.1771	3.22948	3.7911e-187	2.48607e-185	0.0647321	SVZCs	0.499812	0.0669629	0.192603	0.0668475	0.0883226	0.241363
RLBP1	15.6073	3.22696	6.4907e-55	1.28591e-53	0.0243506	SVZCs	0.235086	0.0291759	0.199058	0.0279119	0.0480061	0.211054
SMIM20	27.9106	3.2269	1.98282e-171	1.10585e-169	0.0590038	ARPs	0.499812	0.0669629	0.192603	0.0668475	0.0883226	0.241363
AC005009.2	15.0967	3.22269	1.70142e-51	8.50467e-50	0.0436162	WMAs	0.376669	0.018616	0.259939	0.014796	0.0478368	0.224867
DLC1	56.6483	3.21822	0	0	0.394891	ARPs	2.18256	0.612776	1.81025	0.758702	1.20254	1.79039
ME1	51.7212	3.21703	0	0	0.230651	ARPs	1.57588	0.345305	1.28626	0.439077	0.992666	1.19098
SLC10A1	7.52899	3.21598	5.11332e-14	6.60883e-13	0.0190325	WMAs	0.165743	0.0097359	0.0403548	0.0364247	0.0192148	0.0363557
ATP2C1	58.5143	3.21488	0	0	0.396679	ARPs	2.0837	0.563944	1.21548	0.772876	0.726251	1.07691
TRMT112	12.0227	3.20272	2.70131e-33	8.02298e-32	0.0340999	WMAs	0.296375	0.0526001	0.0632798	0.0739495	0.0367841	0.0734892
PDE4D	56.8646	3.20024	0	0	0.469221	ARPs	2.64621	0.885971	2.41091	1.23638	2.17051	2.03512
C6orf118	9.11404	3.19497	7.93677e-20	9.10471e-19	0.017296	AR2	0.137779	0.0689667	0.0344763	0.437709	0.0356185	0.0160024
COMMD6	40.1785	3.18843	0	0	0.130682	SVZCs	0.887281	0.117226	0.249787	0.145572	0.149657	0.206443
NDUFA1	37.0856	3.18591	4.79862e-301	6.00953e-299	0.109781	SVZCs	0.797947	0.133284	0.198032	0.1259	0.129051	0.208765
SMIM26	17.9005	3.18577	1.16888e-71	8.64575e-70	0.0666138	WMAs	0.490164	0.0725329	0.116785	0.0759657	0.0672094	0.130698
ATP5PF	34.4807	3.1825	1.56256e-260	1.69391e-257	0.27042	WMAs	1.46811	0.256457	0.461225	0.286211	0.31335	0.387876
GNA14-AS1	37.2884	3.17992	2.53267e-304	3.29057e-302	0.101055	SVZCs	0.800536	0.178842	0.801028	0.126953	0.282047	1.8371
CRYAB	37.1386	3.16433	6.69514e-302	1.22239e-298	0.536875	WMAs	2.67023	1.24654	0.459103	1.72805	0.916091	0.39657
RLBP1	14.6649	3.16214	1.08239e-48	1.50373e-47	0.0273308	ARPs	0.235086	0.0291759	0.199058	0.0279119	0.0480061	0.211054
ATP5PD	34.4177	3.16155	1.37152e-259	1.51041e-257	0.0996169	ARPs	0.732402	0.113959	0.194708	0.124183	0.193473	0.180022
AC010624.5	9.36075	3.16062	7.91703e-21	7.21602e-20	0.0190747	SVZCs	0.166639	0.0233826	0.0352851	0.020075	0.0200516	0.094833
ZSCAN31	7.75747	3.15921	8.66394e-15	1.1722e-13	0.038065	WMAs	0.304674	0.0242317	0.138784	0.0353257	0.0390965	0.0652865
BOLA3	25.9198	3.1514	3.98284e-148	1.85705e-146	0.0607918	ARPs	0.502428	0.0708897	0.121914	0.0512764	0.0833591	0.113198
NDUFA1	24.7471	3.14793	3.32789e-135	7.1262e-133	0.127676	WMAs	0.797947	0.133284	0.198032	0.1259	0.129051	0.208765
SNCG	15.7573	3.14565	6.11504e-56	9.63354e-55	0.0298851	ARPs	0.279746	0.0358252	0.128664	0.0131051	0.036059	0.172714
COMMD6	26.9008	3.14548	2.14656e-159	6.36445e-157	0.145123	WMAs	0.887281	0.117226	0.249787	0.145572	0.149657	0.206443
GPR171	10.2959	3.13955	7.34942e-25	6.15973e-24	0.0189017	ARPs	0.16428	0.0200578	0.0672625	0.0613165	0.0269085	0.128337
MRPL51	35.1743	3.13751	4.94006e-271	5.35533e-269	0.102881	SVZCs	0.726069	0.0963362	0.180034	0.114438	0.0925092	0.162608
SNCG	11.0091	3.1361	3.45338e-28	8.60616e-27	0.0348929	WMAs	0.279746	0.0358252	0.128664	0.0131051	0.036059	0.172714
ATP5ME	50.8095	3.13425	0	0	0.242898	SVZCs	1.40814	0.371686	0.531505	0.301391	0.35786	0.476742
DYNLL1	53.6404	3.13117	0	0	0.435323	AR2	2.01247	0.482091	0.654921	0.563126	0.472181	0.553773
RERG	18.4305	3.13086	7.48222e-76	5.8591e-74	0.0721649	WMAs	0.606992	0.0715563	0.797368	0.0811374	0.0910406	0.528704
AC245407.2	9.32533	3.13032	1.10637e-20	8.26617e-20	0.0163474	ARPs	0.150826	0.0184209	0.0293567	0.0322044	0.0292129	0.0122388
GRID2	46.1213	3.12985	0	0	0.342529	ARPs	2.25906	0.682851	2.43339	0.28772	2.25762	1.90409
MERTK	56.2215	3.12182	0	0	0.323116	ARPs	1.79747	0.456371	1.42938	0.566173	1.0951	0.919286
STK17B	32.844	3.11883	1.38609e-236	1.28223e-234	0.0947637	ARPs	0.697412	0.109841	0.46362	0.161122	0.26987	0.279046
ATP5F1E	51.5104	3.1174	0	0	0.350305	AR2	1.88434	0.328898	0.589614	0.272195	0.362225	0.49666
HTRA1	53.3819	3.11317	0	0	0.224026	SVZCs	1.31047	0.468245	1.1047	0.272277	0.727667	0.777692
HSP90AA1	82.9869	3.11112	0	0	0.993308	A0	2.87225	1.90243	1.07502	3.00212	1.74308	1.13794
IQCM	12.533	3.10645	4.92329e-36	9.42543e-35	0.162351	A0	0.271329	0.103011	0.0355523	0.185892	0.0481286	0.0402348
FAT3	56.9964	3.10545	0	0	0.372159	SVZCs	2.20326	1.19645	2.24137	0.660546	2.32861	2.28709
FLRT2	60.3855	3.10075	0	0	0.581354	ARPs	2.90632	1.10373	2.22105	1.33092	2.03154	1.28585
DYNLL1	55.2421	3.09963	0	0	0.422687	SVZCs	2.01247	0.482091	0.654921	0.563126	0.472181	0.553773
NDUFA1	34.9191	3.09824	3.81221e-267	4.43777e-265	0.112644	ARPs	0.797947	0.133284	0.198032	0.1259	0.129051	0.208765
SOD1	47.1962	3.09611	0	0	0.213538	ARPs	1.27426	0.263327	0.355655	0.387029	0.309112	0.375199
AL354771.1	14.149	3.09382	1.89479e-45	2.47572e-44	0.0280971	ARPs	0.247517	0.0323654	0.187193	0.0756641	0.0877779	0.17151
GNA14	53.5804	3.09374	0	0	0.284091	SVZCs	1.7949	0.85679	2.01806	0.462409	1.05661	2.85282
AC092040.1	14.6714	3.09334	9.83241e-49	1.36763e-47	0.0280971	ARPs	0.249114	0.0326083	0.0855526	0.046485	0.0390576	0.14245
HOPX	31.9661	3.09246	3.22334e-224	2.67506e-222	0.0874594	SVZCs	0.667593	0.179677	0.426582	0.105552	0.404825	0.697423
LYPD1	23.0107	3.07995	3.64221e-117	1.23871e-115	0.045977	ARPs	0.39017	0.0549031	0.260577	0.125772	0.140244	0.164883
SCRG1	45.7517	3.07421	0	0	0.191356	SVZCs	1.11532	0.196617	0.492681	0.217903	0.262567	0.4838
SMIM26	25.1465	3.07191	1.54213e-139	6.61268e-138	0.0630907	ARPs	0.490164	0.0725329	0.116785	0.0759657	0.0672094	0.130698
DNAJB1	59.7365	3.07028	0	0	0.778295	A0	1.22312	0.684728	0.251124	1.11912	0.580612	0.473451
PLCG2	57.2734	3.06776	0	0	0.819732	AR2	3.57539	1.50418	2.21859	1.96855	1.97373	1.63696
MEST	12.8992	3.0657	4.54977e-38	1.56269e-36	0.0467883	WMAs	0.312666	0.0517536	0.140933	0.0846435	0.0429066	0.119507
TOMM5	25.0819	3.06177	7.83369e-139	3.34257e-137	0.062069	ARPs	0.481457	0.0714497	0.122974	0.080977	0.0837804	0.124371
CHORDC1	67.1276	3.05262	0	0	0.853942	A0	1.48462	0.365955	0.344566	0.82692	0.385147	0.393702
NDUFA4	43.0075	3.05211	0	0	0.199745	ARPs	1.23482	0.257669	0.441775	0.264835	0.281848	0.529863
NDUFA12	40.6674	3.04734	0	0	0.152192	SVZCs	0.943855	0.130598	0.283133	0.173869	0.20263	0.244018
LINC00499	41.8972	3.0347	0	0	0.260281	ARPs	2.10579	0.631415	2.20259	0.452389	1.10097	1.21809
LINC01351	7.69715	3.03175	1.39136e-14	8.69039e-14	0.0137931	ARPs	0.112064	0.0143962	0.0698488	0.0258544	0.0264111	0.0384843
ATP5PD	35.4786	3.03008	1.04984e-275	1.16727e-273	0.113231	SVZCs	0.732402	0.113959	0.194708	0.124183	0.193473	0.180022
ALDOC	41.6011	3.02888	0	0	0.136364	SVZCs	0.881868	0.337758	0.617065	0.159922	0.371762	0.490183
NQO1	20.214	3.02731	7.36808e-91	7.40866e-89	0.0943695	WMAs	0.584223	0.100324	0.192691	0.0947182	0.0928885	0.151066
SAP18	30.9571	3.01794	2.03788e-210	1.55031e-208	0.0913149	SVZCs	0.610674	0.107771	0.190175	0.0988572	0.11201	0.18767
SLC35F1	53.6217	3.01514	0	0	0.310674	SVZCs	1.84573	0.97421	1.80948	0.506596	1.05135	1.85328
PIK3C2A	61.1552	3.01315	0	0	0.49834	ARPs	2.31048	0.753586	1.94701	0.935446	1.44903	1.59028
NOP10	17.5045	3.00794	1.32317e-68	3.19422e-67	0.0401786	SVZCs	0.30952	0.0358738	0.0634079	0.0441103	0.0364418	0.0798274
NDUFA4	44.8811	3.00714	0	0	0.216924	SVZCs	1.23482	0.257669	0.441775	0.264835	0.281848	0.529863
RPS24	50.2022	3.00379	0	0	0.333333	ARPs	1.73237	0.457568	0.782566	0.523928	0.626769	0.69451
PLA2G5	19.4262	3.00323	4.63194e-84	1.35597e-82	0.0357143	SVZCs	0.276498	0.07349	0.178703	0.0389554	0.195647	0.14372
SMIM26	26.1805	3.00269	4.43179e-151	2.30148e-149	0.0671672	SVZCs	0.490164	0.0725329	0.116785	0.0759657	0.0672094	0.130698
AL354863.1	11.582	3.00243	5.08252e-31	4.94982e-30	0.0214559	ARPs	0.175494	0.0236569	0.126618	0.017405	0.0258301	0.0491025
NQO1	30.128	2.99783	2.08365e-199	1.46616e-197	0.0846185	SVZCs	0.584223	0.100324	0.192691	0.0947182	0.0928885	0.151066
SLC7A11	60.9006	2.99755	0	0	0.711328	AR2	3.08145	1.6198	1.72634	2.16629	1.77935	1.28181
COA6	18.5612	2.9883	6.61675e-77	1.40131e-75	0.0401022	ARPs	0.327832	0.0477317	0.0813453	0.0583231	0.0588219	0.0848525
SLC5A3	52.5419	2.98716	0	0	0.310597	AR2	1.44109	0.518244	0.540142	1.10787	0.511769	0.341294
DDIT3	16.9755	2.98622	1.24699e-64	8.10412e-63	0.0769231	WMAs	0.502832	0.128759	0.112362	0.21081	0.0792348	0.174977
LRP4-AS1	25.638	2.98168	5.76128e-145	2.61253e-143	0.0710089	ARPs	0.479534	0.0750128	0.396139	0.127708	0.12629	0.302122
HSPB1	54.0443	2.98117	0	0	0.449208	AR2	2.10876	1.34622	0.497015	1.81872	1.18058	0.650573
ATP5MD	32.3538	2.98055	1.22479e-229	8.67102e-227	0.27042	WMAs	1.39594	0.275852	0.449328	0.240658	0.325702	0.413933
APOC1	26.465	2.97757	2.44989e-154	6.79894e-152	0.20222	WMAs	1.11967	0.137762	0.536763	0.0815286	0.232715	0.788384
HSPA4L	47.2044	2.97734	0	0	0.265134	ARPs	1.48493	0.36018	0.392709	0.649543	0.398817	0.389243
DNAJA1	34.3158	2.97588	4.55724e-258	4.79062e-255	0.260111	WMAs	1.2878	0.313985	0.292773	0.697955	0.287904	0.388506
HSP90AA1	64.1669	2.97547	0	0	0.729111	AR2	2.87225	1.90243	1.07502	3.00212	1.74308	1.13794
EPHA4	34.8164	2.97521	1.37239e-265	1.57122e-263	0.0960409	ARPs	0.773505	0.138411	0.862971	0.170073	0.103252	0.507195
ARHGAP24	40.2396	2.97363	0	0	0.202299	ARPs	1.43493	0.34167	1.64406	0.109308	0.883161	1.56733
CSTB	42.795	2.97326	0	0	0.209706	ARPs	1.20723	0.261217	0.336586	0.262194	0.215447	0.387066
NDUFB4	47.2429	2.96916	0	0	0.283069	AR2	1.43574	0.195565	0.388975	0.241361	0.225279	0.342875
FSBP	10.2713	2.96837	9.49185e-25	7.93045e-24	0.0206897	ARPs	0.152102	0.0207729	0.082185	0.0371034	0.0544702	0.0478303
LSM3	23.4027	2.96784	4.0091e-121	1.43229e-119	0.058493	ARPs	0.443774	0.0689628	0.121979	0.0744379	0.104179	0.101305
CSTB	44.9203	2.96714	0	0	0.214489	SVZCs	1.20723	0.261217	0.336586	0.262194	0.215447	0.387066
GPC5-AS1	9.92186	2.96467	3.34452e-23	2.67515e-22	0.0209451	ARPs	0.15939	0.0218934	0.179924	0.0265206	0.0682123	0.286528
PRSS35	8.4652	2.96254	2.55711e-17	2.06534e-16	0.0168425	SVZCs	0.121354	0.0245213	0.178503	0.0164169	0.0231669	0.0840855
ADAMTS17	49.0781	2.95448	0	0	0.253247	SVZCs	1.46389	0.298114	1.34097	0.356734	0.473552	1.13102
HSPA1B	48.9509	2.95331	0	0	0.269428	AR2	1.3954	0.839406	0.24211	1.22441	0.818354	0.330783
SNRPE	23.0863	2.95055	6.3627e-118	2.58154e-116	0.0592532	SVZCs	0.403659	0.0639909	0.110418	0.0623449	0.0810236	0.130568
CHORDC1	50.017	2.94939	0	0	0.276373	ARPs	1.48462	0.365955	0.344566	0.82692	0.385147	0.393702
ADRB1	13.7958	2.94875	2.69985e-43	4.27856e-42	0.025974	SVZCs	0.187467	0.058262	0.183952	0.0263555	0.136381	0.149443
UNC5C	39.8666	2.94827	0	0	0.156577	ARPs	1.08268	0.225527	1.05817	0.177263	0.452321	1.36481
DNAJA1	62.0544	2.94801	0	0	0.814664	A0	1.2878	0.313985	0.292773	0.697955	0.287904	0.388506
RANBP17	8.37558	2.9472	5.49512e-17	3.71156e-16	0.0199234	ARPs	0.1685	0.0235174	0.228987	0.0155281	0.0780137	0.286102
HSPA6	8.00615	2.94668	1.18351e-15	7.68408e-15	0.0163474	ARPs	0.185626	0.0261126	0.0032348	0.13157	0.0103578	0.00719691
NDUFA6	25.2539	2.94275	1.02594e-140	4.45986e-139	0.0671775	ARPs	0.488824	0.0788014	0.146024	0.092025	0.0910643	0.16519
AC010624.5	8.79301	2.93819	1.45604e-18	1.02579e-17	0.0201788	ARPs	0.166639	0.0233826	0.0352851	0.020075	0.0200516	0.094833
UQCRB	46.7445	2.93366	0	0	0.294032	AR2	1.51238	0.253328	0.553064	0.249132	0.463208	0.380487
ASNS	11.8886	2.93234	1.35623e-32	1.37326e-31	0.0291188	ARPs	0.208554	0.0299264	0.0192669	0.0411361	0.0209083	0.0204584
ADARB2	29.3605	2.93102	1.75375e-189	1.71857e-187	0.101096	AR2	0.636527	0.227784	0.32065	0.397158	0.447036	0.110365
SLC7A11-AS1	12.4748	2.93068	1.02481e-35	1.10611e-34	0.0296296	ARPs	0.214475	0.030891	0.0645925	0.0879179	0.0436501	0.0941825
FOXP2	17.3151	2.92899	3.61829e-67	6.7958e-66	0.0590038	ARPs	0.552044	0.0923483	0.360371	0.164887	0.232002	0.250578
PTGES3	59.7389	2.92785	0	0	0.505968	AR2	2.0279	0.796392	0.629959	1.40399	0.72183	0.624364
IQCM	9.80638	2.92455	1.05688e-22	1.33759e-21	0.0338611	AR2	0.271329	0.103011	0.0355523	0.185892	0.0481286	0.0402348
FABP7	12.1544	2.92312	5.43385e-34	5.6743e-33	0.0278416	ARPs	0.250187	0.0367929	0.0542968	0.0444278	0.0135666	0.0581237
HDDC2	43.5309	2.92088	0	0	0.198467	ARPs	1.11678	0.240082	0.59721	0.372596	0.312555	0.651847
HSPD1	66.4796	2.91941	0	0	0.875182	A0	1.61138	0.551463	0.425274	1.14166	0.478644	0.636428
TRIB1	8.37915	2.91873	5.33133e-17	3.60233e-16	0.0153257	ARPs	0.12502	0.0174577	0.136393	0.00990005	0.0329131	0.0861457
POLR2K	17.3525	2.9165	1.88702e-67	3.56152e-66	0.0429119	ARPs	0.313368	0.0475934	0.0850635	0.0609352	0.0573274	0.094969
RPL36A	36.8689	2.91497	1.45618e-297	1.77245e-295	0.152192	SVZCs	0.89766	0.182193	0.332923	0.176274	0.282318	0.280857
ZNF728	7.98428	2.91291	1.41348e-15	9.15661e-15	0.0166028	ARPs	0.122252	0.017119	0.103692	0.0108229	0.0585323	0.117006
CACYBP	24.405	2.91207	1.51431e-131	3.01905e-129	0.1364	WMAs	0.724867	0.154567	0.137243	0.311341	0.132272	0.142635
SNRPE	21.9447	2.91175	9.72804e-107	2.95504e-105	0.058493	ARPs	0.403659	0.0639909	0.110418	0.0623449	0.0810236	0.130568
NQO1	28.4554	2.91076	4.17825e-178	2.47344e-176	0.0840358	ARPs	0.584223	0.100324	0.192691	0.0947182	0.0928885	0.151066
PTGES3	75.8755	2.91053	0	0	0.944719	A0	2.0279	0.796392	0.629959	1.40399	0.72183	0.624364
BOLA3	17.5637	2.90852	4.66867e-69	3.29849e-67	0.0848533	WMAs	0.502428	0.0708897	0.121914	0.0512764	0.0833591	0.113198
EDNRB	53.4075	2.90684	0	0	0.305804	SVZCs	1.47992	0.442056	1.31095	0.373191	0.999618	0.803527
NDUFA4	29.7475	2.90449	1.87063e-194	7.81834e-192	0.252974	WMAs	1.23482	0.257669	0.441775	0.264835	0.281848	0.529863
MORN2	20.3941	2.90364	1.88809e-92	4.90988e-91	0.0515964	ARPs	0.377077	0.0594068	0.0981134	0.0999859	0.071347	0.104981
RPL38	42.0425	2.90329	0	0	0.189326	SVZCs	1.07911	0.262127	0.350839	0.230787	0.277458	0.308095
TMA7	31.4624	2.89925	2.84409e-217	1.64436e-214	0.284695	WMAs	1.39436	0.240694	0.427373	0.229426	0.341082	0.386674
NT5E	28.9449	2.89619	3.25383e-184	2.09416e-182	0.0726461	SVZCs	0.484076	0.130135	0.421603	0.0803269	0.237957	0.198936
GTF3C6	30.0615	2.8958	1.5425e-198	1.08318e-196	0.099106	ARPs	0.645307	0.114943	0.199015	0.140175	0.119539	0.218057
POMP	37.8745	2.89394	0	0	0.158621	ARPs	0.925245	0.186338	0.283539	0.201682	0.222168	0.295337
AL445259.1	42.8776	2.89352	0	0	0.183644	SVZCs	1.11848	0.149531	0.726084	0.244711	0.455353	0.375035
SH3RF1	46.3905	2.88881	0	0	0.240868	ARPs	1.38157	0.338257	1.12898	0.27175	0.729764	0.837946
SAP18	29.0842	2.88685	5.6833e-186	3.58461e-184	0.0906769	ARPs	0.610674	0.107771	0.190175	0.0988572	0.11201	0.18767
VIM	32.6874	2.88502	2.36091e-234	1.78044e-231	0.263283	WMAs	1.39925	0.795944	0.773972	0.954411	0.345836	0.960082
AL356737.2	35.1582	2.88423	8.71439e-271	9.41751e-269	0.12155	SVZCs	0.754955	0.11265	0.759712	0.14212	0.359974	1.02343
SPRY1	7.72527	2.8832	1.11614e-14	8.2049e-14	0.0162338	SVZCs	0.12099	0.0190365	0.0886503	0.0172822	0.038822	0.0455794
COX7C	32.5797	2.87977	7.9606e-233	5.8756e-230	0.306899	WMAs	1.46423	0.282724	0.501294	0.264255	0.372695	0.466115
RPL23	37.1364	2.87908	7.26386e-302	1.0285e-299	0.144317	ARPs	0.882957	0.176264	0.337591	0.196704	0.245134	0.298069
TXN	31.7142	2.87821	9.90797e-221	8.4657e-219	0.113921	ARPs	0.725055	0.135256	0.17259	0.147192	0.0959051	0.170218
ADORA2B	20.1831	2.87794	1.37965e-90	4.32341e-89	0.0375406	SVZCs	0.304428	0.124611	0.297862	0.0472731	0.108492	0.374942
TOMM5	25.6006	2.87422	1.5016e-144	7.45213e-143	0.0744724	SVZCs	0.481457	0.0714497	0.122974	0.080977	0.0837804	0.124371
AL354863.1	8.17485	2.87407	2.96234e-16	4.37665e-15	0.0222046	WMAs	0.175494	0.0236569	0.126618	0.017405	0.0258301	0.0491025
PITPNA-AS1	7.36493	2.86899	1.77237e-13	1.06336e-12	0.016092	ARPs	0.121106	0.0174694	0.0415669	0.0335674	0.0256763	0.0431574
COX6C	30.3428	2.86379	3.12916e-202	1.39167e-199	0.268834	WMAs	1.24018	0.194182	0.33669	0.229858	0.290751	0.328991
RPL36A	34.9156	2.86292	4.30934e-267	4.9997e-265	0.144572	ARPs	0.89766	0.182193	0.332923	0.176274	0.282318	0.280857
CHORDC1	35.5815	2.86094	2.7093e-277	3.24088e-274	0.337827	WMAs	1.48462	0.365955	0.344566	0.82692	0.385147	0.393702
GRIA2	52.2011	2.85934	0	0	0.296672	SVZCs	1.57343	0.56401	1.65493	0.423195	1.07276	1.2939
GNG5	29.8351	2.85901	1.37015e-195	9.43068e-194	0.100383	ARPs	0.621684	0.112275	0.188096	0.115704	0.120902	0.212297
GPC5-AS2	30.1298	2.85638	1.97148e-199	1.40433e-197	0.0891443	ARPs	0.587524	0.104722	0.646258	0.11801	0.299758	0.867188
DIO3OS	9.36102	2.85616	7.89669e-21	5.93449e-20	0.0217114	ARPs	0.157901	0.0233482	0.166894	0.00774781	0.0484244	0.37005
CACYBP	43.5238	2.85519	0	0	0.574047	A0	0.724867	0.154567	0.137243	0.311341	0.132272	0.142635
LSM3	24.0661	2.85362	5.65979e-128	2.46966e-126	0.0679789	SVZCs	0.443774	0.0689628	0.121979	0.0744379	0.104179	0.101305
AC006994.2	30.3928	2.85096	6.83329e-203	7.50149e-201	0.104507	AR2	0.627505	0.127211	0.160498	0.296039	0.167356	0.114214
FABP5	22.5238	2.84965	2.42415e-112	3.47494e-110	0.141158	WMAs	0.847119	0.395356	0.319237	0.578319	0.169672	0.66737
DNAH7	54.6547	2.84415	0	0	0.484291	ARPs	2.28003	0.798534	1.98941	1.58911	1.45074	1.39546
ATP5ME	32.6992	2.84353	1.60226e-234	1.23516e-231	0.298969	WMAs	1.40814	0.371686	0.531505	0.301391	0.35786	0.476742
HSPA4L	47.8613	2.84312	0	0	0.34324	AR2	1.48493	0.36018	0.392709	0.649543	0.398817	0.389243
AC139100.2	7.34708	2.8424	2.02583e-13	1.89168e-12	0.0922316	A0	0.0754763	0.0151142	0.0108716	0.0288042	0.00946469	0.00726121
ZNF727	11.5796	2.84158	5.22702e-31	6.33119e-30	0.0245536	SVZCs	0.174764	0.0504483	0.133155	0.0262925	0.104168	0.116469
FTL	37.095	2.84068	3.38081e-301	5.86401e-298	0.632038	WMAs	2.58658	1.1426	1.49617	1.54444	0.998731	1.61223
SLITRK2	33.8437	2.83833	4.48849e-251	4.7041e-249	0.112133	ARPs	0.664923	0.124022	0.514693	0.18513	0.362453	0.37834
BVES-AS1	7.71526	2.8368	1.20732e-14	7.55989e-14	0.0150702	ARPs	0.120297	0.0177346	0.0633708	0.0579877	0.0427723	0.0474819
GTF3C6	20.9396	2.83586	2.33282e-97	2.57725e-95	0.116574	WMAs	0.645307	0.114943	0.199015	0.140175	0.119539	0.218057
NFATC2	29.6083	2.83556	1.16958e-192	7.8175e-191	0.0873563	ARPs	0.612368	0.111853	0.322271	0.20827	0.405092	0.207085
DNAJA1	46.5037	2.83102	0	0	0.240358	ARPs	1.2878	0.313985	0.292773	0.697955	0.287904	0.388506
SOD1	32.2303	2.83023	6.63958e-228	4.60654e-225	0.276764	WMAs	1.27426	0.263327	0.355655	0.387029	0.309112	0.375199
LINC00498	11.1593	2.83023	6.44892e-29	7.42739e-28	0.0257711	SVZCs	0.180978	0.019911	0.137317	0.0275134	0.0431126	0.0884225
AC092040.1	9.77611	2.82829	1.42592e-22	2.82981e-21	0.0436162	WMAs	0.249114	0.0326083	0.0855526	0.046485	0.0390576	0.14245
TSC22D3	20.5132	2.82826	1.64139e-93	6.77856e-92	0.0584653	AR2	0.366952	0.105662	0.132719	0.100561	0.385854	0.0605507
SAP18	20.2143	2.82808	7.32652e-91	7.38829e-89	0.107851	WMAs	0.610674	0.107771	0.190175	0.0988572	0.11201	0.18767
HSPA4L	60.3359	2.82767	0	0	0.808263	A0	1.48493	0.36018	0.392709	0.649543	0.398817	0.389243
TOMM5	17.0558	2.82307	3.16285e-65	2.08196e-63	0.0832672	WMAs	0.481457	0.0714497	0.122974	0.080977	0.0837804	0.124371
CHORDC1	51.1307	2.82268	0	0	0.351766	AR2	1.48462	0.365955	0.344566	0.82692	0.385147	0.393702
S100A1	39.4442	2.8217	0	0	0.171469	SVZCs	0.970159	0.3607	0.356269	0.208425	0.271274	0.400493
TMEM126A	19.1902	2.82149	4.46599e-82	1.00797e-80	0.0523627	ARPs	0.342459	0.0561675	0.114829	0.0644433	0.0675755	0.112423
AC012404.1	40.6746	2.81784	0	0	0.17931	ARPs	1.01287	0.22209	0.744892	0.499403	0.473888	0.766734
ATP5PF	46.1556	2.81779	0	0	0.309622	AR2	1.46811	0.256457	0.461225	0.286211	0.31335	0.387876
ETV1	36.3205	2.81769	7.67196e-289	1.03557e-286	0.121839	ARPs	0.819894	0.165658	0.631543	0.0969797	0.396592	0.587
GNG5	31.068	2.81308	6.51861e-212	4.98085e-210	0.107143	SVZCs	0.621684	0.112275	0.188096	0.115704	0.120902	0.212297
SMIM20	18.5893	2.81188	3.92439e-77	3.15864e-75	0.0911975	WMAs	0.499812	0.0669629	0.192603	0.0668475	0.0883226	0.241363
TUBB2A	27.9789	2.80951	2.93183e-172	1.71799e-170	0.0903003	SVZCs	0.566225	0.162117	0.260932	0.103132	0.182562	0.428766
DYNLL1	64.6393	2.80887	0	0	0.916497	A0	2.01247	0.482091	0.654921	0.563126	0.472181	0.553773
OAF	25.239	2.80624	1.49552e-140	3.45863e-138	0.138779	WMAs	0.744673	0.148589	0.788908	0.0836946	0.146769	0.760776
NDUFA12	26.3597	2.80509	3.97216e-153	1.09361e-150	0.188739	WMAs	0.943855	0.130598	0.283133	0.173869	0.20263	0.244018
COX17	28.4303	2.80487	8.55106e-178	5.03627e-176	0.0934866	ARPs	0.582165	0.107094	0.167401	0.129421	0.128102	0.158827
HS3ST5	26.0149	2.80265	3.35846e-149	1.72856e-147	0.0903003	SVZCs	0.610928	0.193805	0.522267	0.113952	0.192477	0.325529
HSPA4L	32.921	2.80071	1.09925e-237	9.07928e-235	0.33069	WMAs	1.48493	0.36018	0.392709	0.649543	0.398817	0.389243
EIF4EBP1	6.83072	2.79952	8.44874e-12	7.35475e-11	0.089904	A0	0.103496	0.0429787	0.0155407	0.0373617	0.0173003	0.0238318
ME1	50.893	2.79837	0	0	0.297484	SVZCs	1.57588	0.345305	1.28626	0.439077	0.992666	1.19098
ATP5F1E	62.4322	2.79679	0	0	0.884201	A0	1.88434	0.328898	0.589614	0.272195	0.362225	0.49666
SEC61G	21.5715	2.79647	3.32892e-103	4.08057e-101	0.122125	WMAs	0.644266	0.123877	0.174303	0.130401	0.1224	0.192809
CACYBP	34.234	2.7956	7.53632e-257	1.26297e-254	0.135932	AR2	0.724867	0.154567	0.137243	0.311341	0.132272	0.142635
TOMM7	39.8223	2.79499	0	0	0.189935	SVZCs	1.03397	0.249185	0.393737	0.231998	0.240486	0.405269
CTXND1	36.2275	2.79459	2.25104e-287	2.9919e-285	0.128991	ARPs	0.910757	0.194087	0.470595	0.240001	0.620138	0.21053
DLC1	56.2279	2.79285	0	0	0.496753	SVZCs	2.18256	0.612776	1.81025	0.758702	1.20254	1.79039
ESRRG	51.6874	2.79058	0	0	0.419923	ARPs	2.183	0.759801	1.94752	0.768076	1.54008	1.17747
RPL36AL	21.5756	2.78968	3.04319e-103	3.74356e-101	0.120539	WMAs	0.706282	0.0967316	0.184059	0.087922	0.138406	0.19403
MEST	18.0516	2.78881	7.66463e-73	1.55307e-71	0.0434227	ARPs	0.312666	0.0517536	0.140933	0.0846435	0.0429066	0.119507
RPL35A	39.9839	2.78851	0	0	0.195402	ARPs	1.0986	0.254228	0.401781	0.285953	0.35046	0.405366
OAF	35.6627	2.78712	1.49859e-278	1.88355e-276	0.11954	ARPs	0.744673	0.148589	0.788908	0.0836946	0.146769	0.760776
PARD6G-AS1	23.7307	2.78672	1.73797e-124	3.10774e-122	0.138779	WMAs	0.717947	0.15591	0.141764	0.39951	0.141666	0.106049
PARD6G-AS1	42.533	2.78565	0	0	0.565319	A0	0.717947	0.15591	0.141764	0.39951	0.141666	0.106049
FOXJ1	8.46232	2.78247	2.62119e-17	2.90974e-16	0.107943	A0	0.111828	0.02166	0.0170508	0.0818676	0.020115	0.00676925
BCO2	33.1402	2.78044	7.84169e-241	1.17254e-238	0.13106	AR2	0.705006	0.166906	0.215374	0.499027	0.185616	0.138909
ATP5ME	45.148	2.77826	0	0	0.269221	ARPs	1.40814	0.371686	0.531505	0.301391	0.35786	0.476742
SEC61G	30.6115	2.77807	8.61085e-206	6.53634e-204	0.108301	ARPs	0.644266	0.123877	0.174303	0.130401	0.1224	0.192809
MRPL36	12.0188	2.77787	2.82952e-33	2.91178e-32	0.0291188	ARPs	0.212644	0.0339647	0.0689512	0.0504217	0.0365956	0.0841695
PTN	43.6978	2.77702	0	0	0.209451	ARPs	1.24548	0.308238	1.2818	0.193049	0.540914	1.16389
SCRG1	29.3268	2.7717	4.71998e-189	1.88202e-186	0.244251	WMAs	1.11532	0.196617	0.492681	0.217903	0.262567	0.4838
DNM3	31.7792	2.77164	1.25433e-221	7.9114e-219	0.310864	WMAs	1.44891	0.499267	1.23455	0.528462	0.390121	1.30035
CAP2	24.8352	2.77114	3.7403e-136	2.37639e-134	0.0872107	AR2	0.506784	0.367143	0.135171	0.547355	0.188266	0.0922822
ACPP	13.3551	2.77032	1.10668e-40	2.33946e-39	0.177771	A0	0.233301	0.055703	0.0377903	0.138818	0.0684547	0.0120834
FAP	17.1929	2.76985	3.00004e-66	8.8874e-65	0.0550548	AR2	0.363984	0.278983	0.134238	0.41547	0.772322	0.0623864
MRPS6	49.8119	2.76955	0	0	0.317905	AR2	1.402	0.399753	0.536652	0.877919	0.42939	0.371037
POMP	38.9478	2.76835	0	0	0.177354	SVZCs	0.925245	0.186338	0.283539	0.201682	0.222168	0.295337
ESRRG	54.5792	2.76823	0	0	0.437297	SVZCs	2.183	0.759801	1.94752	0.768076	1.54008	1.17747
GLUL	54.4542	2.76729	0	0	0.424107	SVZCs	1.94619	1.02026	1.86314	0.632107	1.43978	2.10922
FZD7	7.48521	2.76687	7.14303e-14	9.17747e-13	0.0317209	WMAs	0.168964	0.0466243	0.103916	0.0888541	0.026686	0.10574
CPED1	27.7293	2.7656	3.09887e-169	2.6029e-167	0.11352	AR2	0.691496	0.04854	0.399396	0.0381428	0.209122	0.136772
PCDH9-AS2	44.5172	2.76433	0	0	0.258238	ARPs	1.38523	0.365281	1.16108	0.619404	0.707607	1.4091
RPS24	50.7261	2.75664	0	0	0.398742	SVZCs	1.73237	0.457568	0.782566	0.523928	0.626769	0.69451
GPC5	68.9832	2.75478	0	0	0.851055	SVZCs	4.20267	2.7928	4.36219	2.3757	3.94296	4.3087
AKAP12	37.1124	2.75223	1.76951e-301	2.24031e-299	0.120942	SVZCs	0.7837	0.231428	0.746118	0.162592	0.164128	1.09622
NDUFB4	57.8558	2.75189	0	0	0.8103	A0	1.43574	0.195565	0.388975	0.241361	0.225279	0.342875
OXTR	9.65705	2.75122	4.58877e-22	3.55402e-21	0.0227331	ARPs	0.161713	0.0257356	0.127834	0.0149061	0.254278	0.272758
ACSBG1	53.2142	2.74947	0	0	0.336039	SVZCs	1.75564	1.32959	1.66763	0.53759	1.80478	1.47952
SLC1A2	67.5593	2.74886	0	0	0.878653	SVZCs	3.93361	2.58779	4.36221	2.1344	3.13006	3.86696
RPL39	23.6054	2.74747	3.39081e-123	5.88135e-121	0.169707	WMAs	0.8505	0.195264	0.277435	0.188565	0.182041	0.212747
TXN	32.5386	2.74739	3.0403e-232	2.67685e-230	0.12987	SVZCs	0.725055	0.135256	0.17259	0.147192	0.0959051	0.170218
SERPINH1	25.3161	2.74691	2.12339e-141	1.41112e-139	0.0991474	AR2	0.537619	0.253079	0.0604712	0.540263	0.127545	0.1008
TRDN	30.481	2.74678	4.65132e-204	3.46999e-202	0.103959	ARPs	0.693479	0.138963	0.440579	0.405998	0.34577	0.348627
GNG5	20.5633	2.74586	5.85356e-94	6.17204e-92	0.121332	WMAs	0.621684	0.112275	0.188096	0.115704	0.120902	0.212297
ABCD2	33.4472	2.74514	2.83127e-245	2.85514e-243	0.119285	ARPs	0.719497	0.145931	0.712188	0.158573	0.516106	0.302992
COPS9	44.6696	2.74383	0	0	0.328624	AR2	1.51683	0.207461	0.46032	0.186992	0.184218	0.426004
SLC2A12	20.707	2.74247	2.99521e-95	8.09849e-94	0.0487867	ARPs	0.344541	0.0596512	0.347182	0.0873402	0.234958	0.185714
SPRY1	7.24087	2.74245	4.4581e-13	2.63371e-12	0.0176245	ARPs	0.12099	0.0190365	0.0886503	0.0172822	0.038822	0.0455794
AC055733.2	12.1959	2.74162	3.26737e-34	3.4264e-33	0.0311622	ARPs	0.220268	0.0361801	0.0830502	0.080524	0.0486985	0.152828
UBB	27.4956	2.74127	1.98388e-166	6.3723e-164	0.19429	WMAs	0.933104	0.312449	0.281281	0.539169	0.207558	0.311363
AKAP12	24.9131	2.73752	5.36563e-137	1.19316e-134	0.137986	WMAs	0.7837	0.231428	0.746118	0.162592	0.164128	1.09622
TOMM7	26.4929	2.73679	1.17051e-154	3.2746e-152	0.217288	WMAs	1.03397	0.249185	0.393737	0.231998	0.240486	0.405269
SLIT1	23.1829	2.7304	6.76989e-119	1.08726e-116	0.140365	WMAs	0.822204	0.0574507	0.660194	0.053526	0.175799	0.799394
FRMD4A	48.6909	2.72995	0	0	0.325081	SVZCs	1.5151	0.508678	1.62386	0.42858	1.2049	1.68991
NDUFA6	17.1227	2.72512	1.00455e-65	6.66305e-64	0.0888184	WMAs	0.488824	0.0788014	0.146024	0.092025	0.0910643	0.16519
MERTK	56.5058	2.72486	0	0	0.418019	SVZCs	1.79747	0.456371	1.42938	0.566173	1.0951	0.919286
FLRT2	60.1401	2.7235	0	0	0.729842	AR2	2.90632	1.10373	2.22105	1.33092	2.03154	1.28585
S100A13	34.0071	2.72244	1.7473e-253	1.73679e-251	0.141843	SVZCs	0.761442	0.193713	0.393106	0.15951	0.227887	0.358551
LUCAT1	28.1243	2.72219	4.9441e-174	1.71511e-171	0.190325	WMAs	1.03149	0.301163	0.855795	0.430968	0.241827	1.20623
ATP2C1	39.9282	2.72039	0	0	0.541634	WMAs	2.0837	0.563944	1.21548	0.772876	0.726251	1.07691
DACH1	28.057	2.71952	3.27778e-173	1.87944e-171	0.119796	ARPs	0.812278	0.174157	0.681224	0.206637	0.107871	0.491671
SLC1A4	43.8604	2.71809	0	0	0.192573	SVZCs	0.982695	0.358726	0.945135	0.226377	0.686598	0.580754
KCNQ3	24.5889	2.71627	1.66136e-133	6.67816e-132	0.0853129	ARPs	0.652405	0.131043	0.810665	0.0770479	0.372132	1.26274
SLC15A2	47.312	2.71471	0	0	0.271009	ARPs	1.35835	0.364786	1.10804	0.654294	0.839919	0.551917
ETV5	10.4056	2.71383	2.33762e-25	2.44695e-24	0.025974	SVZCs	0.175309	0.0543626	0.1626	0.0287885	0.075803	0.157412
RPL30	39.162	2.71327	0	0	0.229885	ARPs	1.20625	0.305242	0.426525	0.324328	0.309638	0.385334
GPR171	6.90904	2.71069	4.87958e-12	5.60135e-11	0.0269627	WMAs	0.16428	0.0200578	0.0672625	0.0613165	0.0269085	0.128337
NDUFA6	25.5015	2.70927	1.89776e-143	9.35132e-142	0.0848214	SVZCs	0.488824	0.0788014	0.146024	0.092025	0.0910643	0.16519
HSPD1	34.7648	2.70747	8.28672e-265	9.27311e-262	0.387787	WMAs	1.61138	0.551463	0.425274	1.14166	0.478644	0.636428
PPP1R3C	38.367	2.70741	0	0	0.173093	SVZCs	1.13279	0.543902	0.612424	0.279281	0.638758	0.87191
STIP1	45.0927	2.70562	0	0	0.606634	A0	0.751715	0.278756	0.15853	0.51391	0.204809	0.19731
RPL23	37.8176	2.70558	0	0	0.167411	SVZCs	0.882957	0.176264	0.337591	0.196704	0.245134	0.298069
SEC61G	31.6713	2.69922	3.85915e-220	3.09893e-218	0.118304	SVZCs	0.644266	0.123877	0.174303	0.130401	0.1224	0.192809
BHMT2	25.5893	2.69883	2.00655e-144	9.07528e-143	0.0827586	ARPs	0.519935	0.0998702	0.301986	0.169435	0.243134	0.268024
CRYZ	26.5953	2.6988	7.70004e-156	5.87064e-154	0.0906212	AR2	0.468111	0.0935527	0.126335	0.189682	0.112415	0.0879618
UQCR10	22.2251	2.69752	1.96382e-109	2.70337e-107	0.158604	WMAs	0.746465	0.206578	0.332743	0.171791	0.157895	0.393887
RPL38	38.5329	2.69605	0	0	0.202554	ARPs	1.07911	0.262127	0.350839	0.230787	0.277458	0.308095
COX7B	26.2728	2.69493	3.92701e-152	1.06428e-149	0.215702	WMAs	0.988916	0.164694	0.321232	0.163437	0.231695	0.362858
AC106845.1	45.7737	2.69445	0	0	0.275862	ARPs	1.48135	0.422048	1.22178	0.441672	0.968162	0.784142
XKR6	37.8841	2.69423	0	0	0.174968	ARPs	1.07786	0.261981	0.976132	0.398137	0.52673	1.00057
AL390783.1	15.1026	2.6929	1.55784e-51	2.87914e-50	0.0377435	SVZCs	0.250666	0.0473578	0.208848	0.0431147	0.133001	0.353366
ADRA1B	8.58119	2.69219	9.38977e-18	6.47577e-17	0.0186462	ARPs	0.1491	0.0245742	0.138423	0.0138171	0.0190891	0.243183
RPL39	34.9428	2.69182	1.66361e-267	1.76485e-265	0.156859	SVZCs	0.8505	0.195264	0.277435	0.188565	0.182041	0.212747
COA6	18.5805	2.69148	4.61895e-77	1.24018e-75	0.0539773	SVZCs	0.327832	0.0477317	0.0813453	0.0583231	0.0588219	0.0848525
CST3	55.0374	2.6912	0	0	0.589894	SVZCs	2.48239	1.33792	1.78132	0.9927	1.22631	1.56502
SRP14	32.118	2.69048	2.47199e-226	1.68144e-223	0.343378	WMAs	1.48066	0.433689	0.563038	0.478194	0.422689	0.67016
RPL30	27.6736	2.68931	1.45068e-168	4.88582e-166	0.247423	WMAs	1.20625	0.305242	0.426525	0.324328	0.309638	0.385334
MT3	51.847	2.68819	0	0	0.644189	ARPs	2.87243	1.2776	1.75908	0.935902	1.36435	1.70464
CXCL14	18.0417	2.68792	9.17545e-73	1.85487e-71	0.0416347	ARPs	0.319721	0.0568206	0.380834	0.0143749	0.0952953	0.439939
TCP1	20.2066	2.68597	8.57096e-91	8.59325e-89	0.112609	WMAs	0.553638	0.150451	0.14454	0.315209	0.108789	0.177295
AC006994.2	29.4778	2.68591	5.55162e-191	3.6753e-189	0.107791	ARPs	0.627505	0.127211	0.160498	0.296039	0.167356	0.114214
GPC5-AS1	10.0507	2.6847	9.12488e-24	9.06998e-23	0.025974	SVZCs	0.15939	0.0218934	0.179924	0.0265206	0.0682123	0.286528
TMA7	43.1251	2.68337	0	0	0.313033	AR2	1.39436	0.240694	0.427373	0.229426	0.341082	0.386674
TNNT1	11.8615	2.68071	1.87514e-32	3.09167e-31	0.0433618	AR2	0.272949	0.00584987	0.0632063	0.00354033	0.0128813	0.0477866
TOMM7	37.0774	2.67899	6.50064e-301	9.16696e-299	0.198467	ARPs	1.03397	0.249185	0.393737	0.231998	0.240486	0.405269
COA6	12.4898	2.67883	8.48529e-36	2.71796e-34	0.0563045	WMAs	0.327832	0.0477317	0.0813453	0.0583231	0.0588219	0.0848525
TRMT112	16.12	2.67524	1.84515e-58	3.04511e-57	0.0434227	ARPs	0.296375	0.0526001	0.0632798	0.0739495	0.0367841	0.0734892
GPC5-AS2	30.6111	2.67428	8.71057e-206	6.37489e-204	0.109172	SVZCs	0.587524	0.104722	0.646258	0.11801	0.299758	0.867188
CASTOR1	8.2624	2.67308	1.42777e-16	1.12311e-15	0.0204951	SVZCs	0.121216	0.0514207	0.129032	0.0200041	0.0789178	0.121219
NACA	41.9803	2.67267	0	0	0.245211	ARPs	1.20428	0.311968	0.484588	0.353595	0.380289	0.421601
TDRD10	13.6933	2.67162	1.11318e-42	1.38162e-41	0.0303959	ARPs	0.210835	0.0361754	0.134691	0.0626387	0.0635389	0.13207
CACYBP	33.4101	2.67088	9.78301e-245	9.7802e-243	0.127458	ARPs	0.724867	0.154567	0.137243	0.311341	0.132272	0.142635
ATP5MF	20.9204	2.66932	3.49342e-97	3.8472e-95	0.134021	WMAs	0.651653	0.166074	0.214302	0.170176	0.1349	0.240684
MRPL36	8.1655	2.66833	3.20095e-16	4.71511e-15	0.038065	WMAs	0.212644	0.0339647	0.0689512	0.0504217	0.0365956	0.0841695
P2RY14	38.665	2.66718	0	0	0.185951	ARPs	1.00987	0.242757	0.778182	0.614209	0.390005	1.15527
CTXND1	35.5503	2.66501	8.22194e-277	1.5934e-274	0.176127	AR2	0.910757	0.194087	0.470595	0.240001	0.620138	0.21053
PRDX1	30.5734	2.66464	2.76558e-205	1.31422e-202	0.291039	WMAs	1.23956	0.352743	0.431379	0.436366	0.327173	0.420831
NRXN1	59.9632	2.66442	0	0	0.812771	ARPs	4.13812	2.37303	4.26992	1.9163	3.57449	3.65921
APOLD1	21.1491	2.66325	2.81002e-99	1.23548e-97	0.0779537	AR2	0.463481	0.246466	0.221964	0.468889	0.288099	0.0889956
SNRPD1	19.7797	2.66045	4.45493e-87	1.0747e-85	0.0630907	ARPs	0.377636	0.0700609	0.128897	0.07336	0.0849785	0.152467
CDC26	20.6053	2.66044	2.45829e-94	6.54476e-93	0.0646232	ARPs	0.383421	0.0713086	0.126106	0.0883125	0.0858418	0.107283
AL031710.1	7.31033	2.66028	2.66495e-13	2.4006e-12	0.0190012	AR2	0.122595	0.00364533	0.0338774	0.00529542	0.0087769	0.0204221
TUBB2B	44.9524	2.65879	0	0	0.26664	SVZCs	1.26728	0.481913	0.819689	0.339314	0.545663	1.18565
CACNB2	50.6884	2.65871	0	0	0.466112	SVZCs	2.19639	1.02158	1.99096	0.817888	1.68961	1.95955
COX6C	41.4794	2.65652	0	0	0.272107	AR2	1.24018	0.194182	0.33669	0.229858	0.290751	0.328991
RPL32	40.889	2.65631	0	0	0.262835	ARPs	1.31319	0.358474	0.566545	0.376361	0.381966	0.510543
EPHA4	34.6919	2.6546	1.04297e-263	1.08978e-261	0.125	SVZCs	0.773505	0.138411	0.862971	0.170073	0.103252	0.507195
HSPA5	27.382	2.65396	4.49082e-165	1.41624e-162	0.250595	WMAs	1.12411	0.51801	0.341908	0.614103	0.285236	0.551645
RFTN2	53.6796	2.65379	0	0	0.425579	AR2	1.73316	0.888143	1.28916	1.28091	1.26452	0.554028
TXNDC17	8.74496	2.64789	2.23094e-18	3.68882e-17	0.0412371	WMAs	0.224619	0.0394965	0.0672151	0.0403245	0.0393965	0.0781365
GNA14-AS1	33.1514	2.64713	5.40047e-241	5.23303e-239	0.126437	ARPs	0.800536	0.178842	0.801028	0.126953	0.282047	1.8371
CDH10	41.8242	2.64611	0	0	0.257471	ARPs	1.38702	0.39185	1.05667	0.540247	0.97873	0.48433
FABP7	11.9187	2.64554	9.45537e-33	1.19623e-31	0.0407873	SVZCs	0.250187	0.0367929	0.0542968	0.0444278	0.0135666	0.0581237
SRP14	44.2891	2.64491	0	0	0.3106	ARPs	1.48066	0.433689	0.563038	0.478194	0.422689	0.67016
DYNLRB1	32.8039	2.64444	5.18118e-236	4.66845e-234	0.12845	SVZCs	0.691541	0.163425	0.174803	0.147921	0.157468	0.170294
SLC22A3	10.2619	2.64428	1.04604e-24	1.40267e-23	0.0341048	AR2	0.196531	0.0418584	0.0828279	0.0363788	0.190168	0.0341476
TXNDC17	12.5932	2.64416	2.30222e-36	2.52017e-35	0.0360153	ARPs	0.224619	0.0394965	0.0672151	0.0403245	0.0393965	0.0781365
SF3B6	20.1048	2.64166	6.70125e-90	1.67725e-88	0.0641124	ARPs	0.398531	0.075535	0.103776	0.0785499	0.104885	0.110275
PRR5	28.8128	2.64113	1.48258e-182	9.36807e-181	0.0886769	SVZCs	0.5063	0.213321	0.49303	0.100444	0.203647	0.455589
POLR2K	11.6932	2.64095	1.3806e-31	3.85303e-30	0.0563045	WMAs	0.313368	0.0475934	0.0850635	0.0609352	0.0573274	0.094969
HSD17B6	11.9281	2.64086	8.44524e-33	8.60651e-32	0.0306513	ARPs	0.197098	0.0343343	0.23828	0.060854	0.0724964	0.124666
PTGES3	38.9831	2.64045	0	0	0.53291	WMAs	2.0279	0.796392	0.629959	1.40399	0.72183	0.624364
MRPS6	46.6267	2.63996	0	0	0.29272	ARPs	1.402	0.399753	0.536652	0.877919	0.42939	0.371037
COMMD6	35.3699	2.63922	4.95331e-274	9.3386e-272	0.186358	AR2	0.887281	0.117226	0.249787	0.145572	0.149657	0.206443
PARD6G-AS1	32.7725	2.63798	1.45235e-235	1.33285e-233	0.123627	ARPs	0.717947	0.15591	0.141764	0.39951	0.141666	0.106049
RPL39	33.0147	2.63647	4.99288e-239	4.74528e-237	0.150958	ARPs	0.8505	0.195264	0.277435	0.188565	0.182041	0.212747
FLRT2	61.093	2.63438	0	0	0.707386	SVZCs	2.90632	1.10373	2.22105	1.33092	2.03154	1.28585
AL451165.2	7.21465	2.63074	5.40729e-13	3.18254e-12	0.0201788	ARPs	0.123473	0.0209971	0.0469401	0.0484099	0.0253053	0.0390949
MORN2	13.5285	2.6307	1.06104e-41	3.97489e-40	0.0769231	WMAs	0.377077	0.0594068	0.0981134	0.0999859	0.071347	0.104981
KLF2	9.44785	2.62847	3.45873e-21	4.38535e-20	0.126564	A0	0.140678	0.125261	0.0241341	0.13469	0.101997	0.0719142
RNF43	7.27909	2.6281	3.36073e-13	4.13565e-12	0.0293418	WMAs	0.164664	0.031463	0.292617	0.040664	0.0285426	0.187635
FTH1	33.9564	2.62528	9.80846e-253	9.45155e-250	0.678033	WMAs	2.65582	1.29017	1.66508	1.27908	1.14591	1.60326
NDUFB3	41.055	2.62377	0	0	0.575502	A0	0.811642	0.0850132	0.184871	0.0943476	0.122392	0.196601
SH3BGRL3	12.1808	2.61957	3.9326e-34	1.20302e-32	0.0618557	WMAs	0.331691	0.106234	0.0839933	0.106169	0.0620356	0.10111
DIO2	7.65529	2.61754	1.9288e-14	1.40263e-13	0.0146104	SVZCs	0.114076	0.0604178	0.247276	0.0194986	0.145457	0.236259
COX6C	52.1022	2.61728	0	0	0.752691	A0	1.24018	0.194182	0.33669	0.229858	0.290751	0.328991
TMEM126A	19.4651	2.61717	2.17121e-84	6.41562e-83	0.0622971	SVZCs	0.342459	0.0561675	0.114829	0.0644433	0.0675755	0.112423
ABCD2	34.2785	2.61593	1.64315e-257	1.67158e-255	0.14164	SVZCs	0.719497	0.145931	0.712188	0.158573	0.516106	0.302992
AC106845.1	48.087	2.61371	0	0	0.314732	SVZCs	1.48135	0.422048	1.22178	0.441672	0.968162	0.784142
TXNDC17	13.0478	2.61363	6.54319e-39	9.51313e-38	0.039164	SVZCs	0.224619	0.0394965	0.0672151	0.0403245	0.0393965	0.0781365
POMP	25.4005	2.61348	2.48846e-142	5.87242e-140	0.214909	WMAs	0.925245	0.186338	0.283539	0.201682	0.222168	0.295337
RPL30	40.2666	2.61128	0	0	0.261972	SVZCs	1.20625	0.305242	0.426525	0.324328	0.309638	0.385334
EDNRB	47.3276	2.60948	0	0	0.322861	ARPs	1.47992	0.442056	1.31095	0.373191	0.999618	0.803527
CRYZ	26.2283	2.60581	1.26526e-151	6.06239e-150	0.0855683	ARPs	0.468111	0.0935527	0.126335	0.189682	0.112415	0.0879618
COPS9	54.9447	2.60549	0	0	0.806517	A0	1.51683	0.207461	0.46032	0.186992	0.184218	0.426004
RPL23A	37.8884	2.60507	0	0	0.215326	ARPs	1.08592	0.279522	0.483831	0.315211	0.30916	0.528333
RPL38	26.7503	2.60249	1.22603e-157	3.60431e-155	0.233148	WMAs	1.07911	0.262127	0.350839	0.230787	0.277458	0.308095
KCNE4	14.7389	2.60177	3.6275e-49	1.68684e-47	0.0983347	WMAs	0.599977	0.418968	0.167429	0.504049	0.127008	0.196576
SAP30	26.3617	2.60148	3.76449e-153	1.82389e-151	0.0947637	ARPs	0.513945	0.104994	0.243767	0.179655	0.170948	0.206026
SLC7A10	15.7258	2.60119	1.00686e-55	1.57973e-54	0.0355045	ARPs	0.256129	0.0469876	0.278849	0.0233794	0.182818	0.197936
RPS13	22.5387	2.59716	1.73154e-112	2.51326e-110	0.176844	WMAs	0.823991	0.235098	0.324101	0.24612	0.191833	0.365092
AP000462.1	38.2377	2.59546	0	0	0.198255	SVZCs	0.960824	0.12736	0.674225	0.236672	0.256144	1.01834
MRPL51	31.0855	2.59512	3.78793e-212	4.61064e-210	0.142266	AR2	0.726069	0.0963362	0.180034	0.114438	0.0925092	0.162608
RPL35A	40.4654	2.59494	0	0	0.231534	SVZCs	1.0986	0.254228	0.401781	0.285953	0.35046	0.405366
ATP2C1	56.1439	2.59282	0	0	0.527597	SVZCs	2.0837	0.563944	1.21548	0.772876	0.726251	1.07691
SOD1	55.6867	2.59246	0	0	0.796043	A0	1.27426	0.263327	0.355655	0.387029	0.309112	0.375199
SNRPD1	20.4138	2.59166	1.25987e-92	4.03182e-91	0.070414	SVZCs	0.377636	0.0700609	0.128897	0.07336	0.0849785	0.152467
GTF3C6	29.8997	2.59089	1.98711e-196	1.37591e-194	0.128044	SVZCs	0.645307	0.114943	0.199015	0.140175	0.119539	0.218057
GSTM5	22.9155	2.59061	3.25829e-116	1.72829e-114	0.0855055	AR2	0.446242	0.140528	0.224868	0.246024	0.102917	0.0892665
SH3BGR	47.2716	2.5901	0	0	0.682572	A0	1.11595	0.428923	0.293313	0.816928	0.320424	0.13207
SNRPG	24.0894	2.58993	3.22656e-128	1.2153e-126	0.0871009	ARPs	0.480768	0.0976093	0.148899	0.113786	0.122048	0.168338
AC073050.1	34.3138	2.58822	4.88985e-258	4.98908e-255	0.435369	WMAs	2.02267	1.24544	2.00925	0.961199	0.737455	1.68644
LINC02698	25.4833	2.58716	3.01906e-143	1.34963e-141	0.0863346	ARPs	0.572581	0.120987	0.573587	0.185296	0.486664	0.435053
CYP39A1	10.1256	2.58715	4.2553e-24	5.58518e-23	0.0336175	AR2	0.195363	0.0762017	0.0706294	0.212961	0.114241	0.0352748
CHRDL1	25.0037	2.58689	5.57606e-138	2.35321e-136	0.0842912	ARPs	0.485961	0.0990759	0.521851	0.113095	0.107748	0.364902
UQCRB	30.4043	2.586	4.82131e-203	2.20067e-200	0.351308	WMAs	1.51238	0.253328	0.553064	0.249132	0.463208	0.380487
RGCC	21.2008	2.58553	9.38286e-100	4.15698e-98	0.0789281	AR2	0.42709	0.120954	0.198632	0.218828	0.192445	0.0850426
SVBP	7.14265	2.58309	9.15495e-13	1.09626e-11	0.0333069	WMAs	0.172027	0.0366982	0.0579056	0.0504401	0.030845	0.052321
SF3B6	20.6654	2.58299	7.09061e-95	2.31832e-93	0.072849	SVZCs	0.398531	0.075535	0.103776	0.0785499	0.104885	0.110275
NDUFB2	21.6444	2.57948	6.86548e-104	8.56704e-102	0.169707	WMAs	0.728521	0.215476	0.289779	0.220284	0.164963	0.327613
GPAM	37.9718	2.57758	0	0	0.176339	SVZCs	0.833846	0.278555	0.987407	0.197325	0.886381	0.632866
NUPR1	46.3966	2.5767	0	0	0.663078	A0	0.985334	0.496305	0.247947	0.690098	0.299232	0.34904
BANF1	11.7476	2.57662	7.26528e-32	2.05238e-30	0.0602696	WMAs	0.311362	0.0883566	0.101785	0.120738	0.0594319	0.109898
SAT1	45.0947	2.57613	0	0	0.280235	SVZCs	1.29284	0.433766	1.13784	0.366879	0.682077	1.36276
EIF1AY	13.5605	2.57262	6.86602e-42	8.39556e-41	0.0398467	ARPs	0.231513	0.0428589	0.0889425	0.0649934	0.0494915	0.0741251
RPL32	42.2158	2.57236	0	0	0.28957	SVZCs	1.31319	0.358474	0.566545	0.376361	0.381966	0.510543
AC092040.1	14.2791	2.57173	2.95265e-46	4.91967e-45	0.0440341	SVZCs	0.249114	0.0326083	0.0855526	0.046485	0.0390576	0.14245
NDUFB1	31.1867	2.57085	1.61511e-213	1.31831e-211	0.133333	ARPs	0.721192	0.163715	0.238933	0.175373	0.22422	0.22952
ATP5MD	42.7322	2.56714	0	0	0.344214	AR2	1.39594	0.275852	0.449328	0.240658	0.325702	0.413933
UQCR10	32.4294	2.56552	1.05739e-230	9.17017e-229	0.148945	SVZCs	0.746465	0.206578	0.332743	0.171791	0.157895	0.393887
MRPL47	17.6592	2.56203	8.64171e-70	1.68416e-68	0.0556833	ARPs	0.30292	0.0581864	0.115419	0.0962998	0.0761089	0.114283
GDF10	11.9176	2.55989	9.5831e-33	1.21195e-31	0.0320617	SVZCs	0.184766	0.0576272	0.0883285	0.0338368	0.0522611	0.0856174
NDUFC1	36.0243	2.55968	3.49037e-284	4.50115e-282	0.174713	ARPs	0.875912	0.213205	0.290545	0.223286	0.244696	0.325611
SNRPE	14.5387	2.55884	6.8908e-48	3.08043e-46	0.0848533	WMAs	0.403659	0.0639909	0.110418	0.0623449	0.0810236	0.130568
COX7A1	17.9637	2.55859	3.75033e-72	1.41258e-70	0.251673	A0	0.370069	0.0356687	0.0732655	0.0377197	0.0333621	0.0796119
IGSF10	25.4853	2.55836	2.87051e-143	1.28488e-141	0.0909323	ARPs	0.507217	0.106304	0.321572	0.252642	0.166988	0.431071
SEZ6L	7.91288	2.55563	2.51502e-15	2.46806e-14	0.0243605	AR2	0.158993	0.128761	0.0372174	0.10084	0.0616044	0.0288903
AL390783.1	14.1724	2.55439	1.35777e-45	1.7821e-44	0.0398467	ARPs	0.250666	0.0473578	0.208848	0.0431147	0.133001	0.353366
FKBP4	28.6634	2.55376	1.09143e-180	1.23731e-178	0.391621	A0	0.429216	0.132619	0.0873656	0.20571	0.0940258	0.0890675
AL360178.1	15.9262	2.55295	4.17056e-57	6.71666e-56	0.051341	ARPs	0.29967	0.057837	0.235481	0.143585	0.174436	0.296433
PIK3C2A	61.3493	2.55184	0	0	0.627029	SVZCs	2.31048	0.753586	1.94701	0.935446	1.44903	1.59028
SLC22A3	11.0684	2.55135	1.78561e-28	2.03425e-27	0.0267857	SVZCs	0.196531	0.0418584	0.0828279	0.0363788	0.190168	0.0341476
NDUFAF4	18.0234	2.55118	1.27611e-72	2.57524e-71	0.051341	ARPs	0.30895	0.0599296	0.107561	0.0847874	0.0936975	0.132206
SPARC	21.8296	2.55051	1.21533e-105	5.75168e-104	0.100853	AR2	0.529252	0.525661	0.248613	1.04237	0.937654	0.112514
CSTB	50.4537	2.55046	0	0	0.733198	A0	1.20723	0.261217	0.336586	0.262194	0.215447	0.387066
POLR2K	17.1363	2.55028	7.94927e-66	1.85572e-64	0.0590503	SVZCs	0.313368	0.0475934	0.0850635	0.0609352	0.0573274	0.094969
EAF2	37.0568	2.55004	1.39576e-300	1.95238e-298	0.171137	ARPs	0.88119	0.216241	0.640453	0.472476	0.626733	0.362596
DYNLRB1	21.6943	2.54716	2.3246e-104	2.92175e-102	0.143537	WMAs	0.691541	0.163425	0.174803	0.147921	0.157468	0.170294
RPL32	28.3848	2.54674	3.11818e-177	1.11515e-174	0.310071	WMAs	1.31319	0.358474	0.566545	0.376361	0.381966	0.510543
TMEM126A	12.7555	2.54641	2.90356e-37	9.71306e-36	0.073751	WMAs	0.342459	0.0561675	0.114829	0.0644433	0.0675755	0.112423
SLIRP	38.1507	2.54579	0	0	0.20894	ARPs	1.01515	0.263418	0.412787	0.310128	0.297432	0.469753
TPT1	45.2797	2.54578	0	0	0.398212	ARPs	1.68833	0.562646	0.653931	0.61254	0.600765	0.662035
APOE	50.6255	2.5454	0	0	0.674716	SVZCs	2.82555	1.72975	1.98777	1.31334	1.88031	1.94687
SLC14A1	45.138	2.54263	0	0	0.430938	AR2	1.96223	1.5663	1.77509	1.66874	2.39889	0.717619
NDUFS5	33.0532	2.54215	1.401e-239	1.28573e-237	0.154221	SVZCs	0.770733	0.184778	0.222176	0.181812	0.208709	0.247048
ZFHX4-AS1	14.2237	2.53685	6.53038e-46	1.07927e-44	0.0401786	SVZCs	0.250059	0.0801945	0.248166	0.0477953	0.119461	0.177212
PRDX1	41.5702	2.53659	0	0	0.267433	ARPs	1.23956	0.352743	0.431379	0.436366	0.327173	0.420831
MFGE8	24.4163	2.53648	1.14861e-131	5.18142e-130	0.0809659	SVZCs	0.418552	0.0918801	0.414018	0.085799	0.218383	0.267872
AL138828.1	28.4973	2.53498	1.2649e-178	7.55236e-177	0.117497	ARPs	0.636295	0.142775	0.536686	0.319501	0.384543	0.67454
SERPINB9	26.4964	2.53485	1.06745e-154	5.66208e-153	0.0957792	SVZCs	0.495964	0.111979	0.313717	0.105077	0.26878	0.253183
HSPA8	55.2466	2.53319	0	0	0.791388	A0	1.25132	0.358996	0.358388	0.880251	0.379587	0.375836
COX17	18.9248	2.531	7.12393e-80	5.9693e-78	0.130849	WMAs	0.582165	0.107094	0.167401	0.129421	0.128102	0.158827
HSPA8	42.252	2.53028	0	0	0.25696	ARPs	1.25132	0.358996	0.358388	0.880251	0.379587	0.375836
ATP5PO	29.3259	2.53013	4.8497e-189	3.24154e-187	0.119521	SVZCs	0.589998	0.13283	0.235012	0.130316	0.178798	0.225507
STK17B	31.3953	2.52827	2.34184e-216	1.8297e-214	0.13819	SVZCs	0.697412	0.109841	0.46362	0.161122	0.26987	0.279046
DIAPH3	26.4783	2.52771	1.7237e-154	1.29147e-152	0.111815	AR2	0.567645	0.150055	0.425939	0.351066	0.29001	0.124433
SLC8A1	27.3285	2.52697	1.94624e-164	6.08244e-162	0.260904	WMAs	1.42883	0.659566	1.78509	0.460923	0.438685	1.56527
NDUFB3	32.1765	2.52629	3.76133e-227	4.96124e-225	0.167357	AR2	0.811642	0.0850132	0.184871	0.0943476	0.122392	0.196601
RPS23	36.4553	2.52525	5.66221e-291	7.70283e-289	0.228863	ARPs	1.10789	0.301789	0.428779	0.302171	0.344013	0.428392
FKBP4	23.004	2.52468	4.24928e-117	2.28539e-115	0.0881851	AR2	0.429216	0.132619	0.0873656	0.20571	0.0940258	0.0890675
MANF	7.59677	2.52459	3.03624e-14	3.97011e-13	0.038858	WMAs	0.202807	0.0911314	0.0562572	0.0741866	0.0383299	0.0976685
FTL	46.3643	2.52458	0	0	0.599234	ARPs	2.58658	1.1426	1.49617	1.54444	0.998731	1.61223
CHAC2	12.2053	2.52391	2.91193e-34	3.05828e-33	0.0367816	ARPs	0.19858	0.0374829	0.105413	0.0690475	0.0585772	0.0978503
AC058791.1	26.6088	2.52332	5.37302e-156	2.66271e-154	0.10447	ARPs	0.537213	0.116638	0.283457	0.224499	0.220752	0.437433
RPS23	38.2717	2.52313	0	0	0.239448	SVZCs	1.10789	0.301789	0.428779	0.302171	0.344013	0.428392
TXN	29.7391	2.52066	2.39653e-194	2.44516e-192	0.163459	AR2	0.725055	0.135256	0.17259	0.147192	0.0959051	0.170218
PHGDH	32.212	2.51844	1.19903e-227	1.59978e-225	0.165408	AR2	0.733693	0.28799	0.299768	0.38491	0.24602	0.173092
MT3	37.8197	2.51746	0	0	0.778747	WMAs	2.87243	1.2776	1.75908	0.935902	1.36435	1.70464
AL627171.2	23.1378	2.51726	1.93055e-118	3.05802e-116	0.215702	WMAs	0.871689	0.249366	0.286819	0.273815	0.217498	0.23544
MYBPC1	39.8736	2.51662	0	0	0.255055	AR2	1.04372	0.373781	0.58335	0.509295	0.870813	0.27877
NDUFS5	31.3238	2.5166	2.21468e-215	1.83359e-213	0.150192	ARPs	0.770733	0.184778	0.222176	0.181812	0.208709	0.247048
FAM200B	28.3717	2.51612	4.51954e-177	2.65284e-175	0.119285	ARPs	0.60854	0.136669	0.273025	0.144983	0.202914	0.28144
COX17	28.3688	2.51525	4.90296e-177	2.95797e-175	0.115666	SVZCs	0.582165	0.107094	0.167401	0.129421	0.128102	0.158827
MRPS6	33.0902	2.51392	4.11016e-240	3.56454e-237	0.358446	WMAs	1.402	0.399753	0.536652	0.877919	0.42939	0.371037
AC090993.1	7.13242	2.51375	9.862e-13	6.65071e-12	0.0194805	SVZCs	0.138387	0.0401731	0.220613	0.0256563	0.141655	0.161719
AC009951.6	13.7143	2.51347	8.33569e-43	1.85125e-41	0.184754	A0	0.198193	0.0166205	0.0376705	0.0226583	0.0198893	0.0217207
ATP5PF	55.0681	2.51127	0	0	0.816701	A0	1.46811	0.256457	0.461225	0.286211	0.31335	0.387876
TMA7	52.5253	2.50765	0	0	0.780623	A0	1.39436	0.240694	0.427373	0.229426	0.341082	0.386674
ARHGAP26-AS1	8.76377	2.50711	1.88823e-18	1.32597e-17	0.0296296	ARPs	0.167249	0.0315216	0.0713554	0.0653902	0.0746821	0.0633084
NDUFA12	35.4053	2.50598	1.41267e-274	2.70749e-272	0.218758	AR2	0.943855	0.130598	0.283133	0.173869	0.20263	0.244018
RAB39A	8.9403	2.50391	3.88104e-19	4.61073e-18	0.11929	A0	0.117204	0.0575183	0.0216857	0.0922264	0.0359626	0.0299364
PET100	18.4748	2.50293	3.29442e-76	8.73058e-75	0.0610795	SVZCs	0.337012	0.0784352	0.111001	0.0683133	0.0778861	0.115518
CCDC151	11.4429	2.50285	2.55182e-30	3.99291e-29	0.0331303	AR2	0.172203	0.0857705	0.0667979	0.126977	0.0486289	0.0326163
ATP5PO	27.8162	2.5007	2.76002e-170	1.53438e-168	0.117497	ARPs	0.589998	0.13283	0.235012	0.130316	0.178798	0.225507
ZCRB1	26.5693	2.50046	1.53509e-155	7.58581e-154	0.102427	ARPs	0.543016	0.119957	0.247899	0.127612	0.186304	0.215552
SOD1	42.7612	2.50033	0	0	0.312058	AR2	1.27426	0.263327	0.355655	0.387029	0.309112	0.375199
RPL39	32.2205	2.49971	9.11403e-228	1.22072e-225	0.183191	AR2	0.8505	0.195264	0.277435	0.188565	0.182041	0.212747
TXN	37.068	2.49893	9.21081e-301	2.23443e-298	0.530695	A0	0.725055	0.135256	0.17259	0.147192	0.0959051	0.170218
UBL5	27.756	2.49774	1.47326e-169	8.47551e-168	0.117898	SVZCs	0.598037	0.15763	0.195409	0.13534	0.164715	0.280471
AC025580.3	8.80097	2.49657	1.35634e-18	9.55942e-18	0.0229885	ARPs	0.134459	0.0251821	0.0463161	0.069945	0.033383	0.0423437
BCO2	31.2776	2.49484	9.42475e-215	7.76591e-213	0.141507	ARPs	0.705006	0.166906	0.215374	0.499027	0.185616	0.138909
PLCG2	50.2231	2.49422	0	0	0.836648	SVZCs	3.57539	1.50418	2.21859	1.96855	1.97373	1.63696
AC008892.1	16.7021	2.49422	1.26467e-62	2.23036e-61	0.0533844	ARPs	0.300946	0.0604569	0.103127	0.162947	0.0656374	0.17693
DNAJB4	23.2792	2.49347	7.19468e-120	1.19992e-117	0.176051	WMAs	0.744704	0.191955	0.189363	0.4979	0.179292	0.19554
EPAS1	19.4983	2.49175	1.13533e-84	3.36334e-83	0.057224	SVZCs	0.312069	0.239631	0.358656	0.0630835	0.179451	0.657637
RASL10A	15.2848	2.49111	9.65875e-53	1.83495e-51	0.0470779	SVZCs	0.281348	0.0586219	0.252098	0.0561841	0.134191	0.29805
DYNLRB1	30.3671	2.48917	1.49615e-202	1.09037e-200	0.135121	ARPs	0.691541	0.163425	0.174803	0.147921	0.157468	0.170294
ATP5MG	39.4082	2.48909	0	0	0.212459	SVZCs	0.941444	0.299814	0.418357	0.245704	0.346776	0.382341
MICOS10	30.0798	2.48666	8.89934e-199	6.27476e-197	0.139974	ARPs	0.707291	0.168478	0.314372	0.198449	0.192295	0.290845
HDDC2	28.4504	2.48562	4.81934e-178	1.74149e-175	0.285488	WMAs	1.11678	0.240082	0.59721	0.372596	0.312555	0.651847
PLCG2	36.0614	2.48554	9.147e-285	1.17522e-281	0.870738	WMAs	3.57539	1.50418	2.21859	1.96855	1.97373	1.63696
NDUFC1	37.2154	2.4855	3.85167e-303	4.9123e-301	0.197849	SVZCs	0.875912	0.213205	0.290545	0.223286	0.244696	0.325611
RNF43	10.3224	2.48545	5.58242e-25	4.69123e-24	0.0275862	ARPs	0.164664	0.031463	0.292617	0.040664	0.0285426	0.187635
RHOJ	45.5162	2.48544	0	0	0.287541	SVZCs	1.30153	0.476756	1.22581	0.390457	0.564197	1.0074
CYP2J2	29.3876	2.48529	7.90234e-190	5.16257e-188	0.109834	ARPs	0.614857	0.141231	0.65706	0.221295	0.669916	0.4601
COX7C	42.6211	2.48499	0	0	0.351523	AR2	1.46423	0.282724	0.501294	0.264255	0.372695	0.466115
MT1E	46.3703	2.48411	0	0	0.393263	SVZCs	1.65617	0.741842	0.752369	0.564003	0.802866	1.0489
UQCRH	32.8604	2.48229	8.09115e-237	7.32851e-235	0.150162	SVZCs	0.72998	0.184562	0.286918	0.175959	0.2638	0.271529
NDUFA1	39.4914	2.47902	0	0	0.57172	A0	0.797947	0.133284	0.198032	0.1259	0.129051	0.208765
LPAR1	9.10164	2.47858	8.89796e-20	7.81246e-19	0.0271916	SVZCs	0.16789	0.128873	0.149199	0.032273	0.0323744	0.282662
TMEM251	7.53736	2.47824	4.79575e-14	2.93878e-13	0.0217114	ARPs	0.125773	0.0237678	0.0527608	0.039524	0.0247776	0.05861
AC005162.3	35.149	2.47703	1.20414e-270	2.21014e-268	0.189525	AR2	0.858055	0.442311	0.653426	0.492359	0.720835	0.218346
TSHR	22.7961	2.47647	5.01171e-115	1.66849e-113	0.0914432	ARPs	0.497158	0.109503	0.303541	0.245791	0.195407	0.260237
LINC01338	20.2396	2.4737	4.38467e-91	1.75843e-89	0.0811206	AR2	0.38504	0.1879	0.198582	0.319103	0.311161	0.0811695
NOP10	19.067	2.47035	4.74685e-81	2.02544e-79	0.263602	A0	0.30952	0.0358738	0.0634079	0.0441103	0.0364418	0.0798274
SRP14	44.8114	2.46944	0	0	0.353896	SVZCs	1.48066	0.433689	0.563038	0.478194	0.422689	0.67016
RPL12	33.1952	2.46918	1.26249e-241	1.17101e-239	0.179789	SVZCs	0.845357	0.227562	0.348793	0.21509	0.271781	0.300926
ST13	47.9356	2.46887	0	0	0.393666	AR2	1.42687	0.465995	0.471372	0.840913	0.460863	0.452234
LINC00844	28.2549	2.46787	1.23897e-175	1.09363e-173	0.142509	AR2	0.691482	0.193956	0.241122	0.269653	0.309913	0.165647
DNAJA1	44.5426	2.46688	0	0	0.341778	AR2	1.2878	0.313985	0.292773	0.697955	0.287904	0.388506
AP000462.1	25.0798	2.46677	8.2639e-139	1.87369e-136	0.211737	WMAs	0.960824	0.12736	0.674225	0.236672	0.256144	1.01834
HIST2H2BF	7.47436	2.46672	7.75782e-14	7.1517e-13	0.0236297	AR2	0.115435	0.049027	0.0427953	0.173467	0.0624448	0.0218941
CFAP97D2	7.31688	2.46651	2.53807e-13	2.28749e-12	0.0250914	AR2	0.137823	0.0557874	0.061846	0.315756	0.0687884	0.026385
ASNS	11.5524	2.46522	7.17977e-31	8.67223e-30	0.0424107	SVZCs	0.208554	0.0299264	0.0192669	0.0411361	0.0209083	0.0204584
NDUFB1	31.8478	2.46297	1.40986e-222	1.15622e-220	0.157062	SVZCs	0.721192	0.163715	0.238933	0.175373	0.22422	0.22952
ADAM33	19.3604	2.46078	1.66719e-83	3.8403e-82	0.0633461	ARPs	0.367838	0.0776667	0.13051	0.26845	0.10747	0.0831839
NACA	42.1784	2.46028	0	0	0.289773	SVZCs	1.20428	0.311968	0.484588	0.353595	0.380289	0.421601
CHRDL1	17.0095	2.45947	6.98571e-65	4.58099e-63	0.107851	WMAs	0.485961	0.0990759	0.521851	0.113095	0.107748	0.364902
DDIT3	27.5139	2.45799	1.19803e-166	1.21519e-164	0.39133	A0	0.502832	0.128759	0.112362	0.21081	0.0792348	0.174977
PTCH1	33.2575	2.45683	1.59311e-242	1.57002e-240	0.151724	ARPs	0.783441	0.196036	0.75552	0.289659	0.745492	0.352317
ADAMTS17	29.9581	2.45573	3.45553e-197	1.47991e-194	0.333862	WMAs	1.46389	0.298114	1.34097	0.356734	0.473552	1.13102
CTXND1	35.4538	2.45394	2.53467e-275	2.80025e-273	0.183644	SVZCs	0.910757	0.194087	0.470595	0.240001	0.620138	0.21053
ATP5PD	30.6938	2.45308	6.89266e-207	7.97021e-205	0.166139	AR2	0.732402	0.113959	0.194708	0.124183	0.193473	0.180022
AC007402.1	8.9489	2.45281	3.59045e-19	3.08757e-18	0.0351055	SVZCs	0.210015	0.0689112	0.501857	0.0417998	0.204287	0.294032
HSPA8	42.7603	2.45126	0	0	0.327406	AR2	1.25132	0.358996	0.358388	0.880251	0.379587	0.375836
CXXC4	15.345	2.45043	3.82575e-53	9.38581e-52	0.0574909	AR2	0.277243	0.106357	0.191772	0.239212	0.24023	0.0568074
UFC1	14.2936	2.45022	2.39761e-46	1.02304e-44	0.0880254	WMAs	0.414064	0.0914994	0.128071	0.116741	0.0897141	0.141217
AC245407.2	10.6377	2.45005	1.98959e-26	2.93697e-25	0.142275	A0	0.150826	0.0184209	0.0293567	0.0322044	0.0292129	0.0122388
PLCB1	59.3755	2.44922	0	0	0.731331	SVZCs	3.03766	1.88254	2.83265	1.53383	2.92141	2.55578
DACH1	28.0391	2.44863	5.42493e-173	3.20598e-171	0.135958	SVZCs	0.812278	0.174157	0.681224	0.206637	0.107871	0.491671
ALDH1L2	9.18791	2.447	4.00542e-20	7.21059e-19	0.0555115	WMAs	0.26982	0.0990622	0.0637155	0.129987	0.0552471	0.0783995
ZFPM2-AS1	18.8049	2.44653	6.88803e-79	1.49528e-77	0.0720307	ARPs	0.391585	0.084279	0.297526	0.157184	0.259318	0.314532
SOD1	43.7504	2.44646	0	0	0.311891	SVZCs	1.27426	0.263327	0.355655	0.387029	0.309112	0.375199
HSPD1	45.0874	2.44614	0	0	0.381354	ARPs	1.61138	0.551463	0.425274	1.14166	0.478644	0.636428
BOLA3	23.2367	2.44521	1.94046e-119	1.06175e-117	0.106943	AR2	0.502428	0.0708897	0.121914	0.0512764	0.0833591	0.113198
FKBP4	15.8569	2.44289	1.26028e-56	6.99508e-55	0.0967486	WMAs	0.429216	0.132619	0.0873656	0.20571	0.0940258	0.0890675
SH3BGR	25.4375	2.442	9.71222e-143	2.30765e-140	0.274385	WMAs	1.11595	0.428923	0.293313	0.816928	0.320424	0.13207
CRYAB	42.7633	2.43946	0	0	0.598978	ARPs	2.67023	1.24654	0.459103	1.72805	0.916091	0.39657
SLC8A1	39.6686	2.43839	0	0	0.268263	SVZCs	1.42883	0.659566	1.78509	0.460923	0.438685	1.56527
PTGES3	50.8854	2.4381	0	0	0.50728	ARPs	2.0279	0.796392	0.629959	1.40399	0.72183	0.624364
SERPINB9	24.9403	2.43799	2.71913e-137	1.13373e-135	0.0965517	ARPs	0.495964	0.111979	0.313717	0.105077	0.26878	0.253183
RPL23A	25.8139	2.43726	6.19719e-147	1.55783e-144	0.264076	WMAs	1.08592	0.279522	0.483831	0.315211	0.30916	0.528333
AMPH	14.3609	2.4357	9.09723e-47	1.53344e-45	0.0460633	SVZCs	0.251523	0.0924816	0.227669	0.0515094	0.163764	0.157989
MRPL51	37.7225	2.43532	0	0	0.540879	A0	0.726069	0.0963362	0.180034	0.114438	0.0925092	0.162608
ST13	33.4941	2.4349	5.88246e-246	5.23237e-243	0.406027	WMAs	1.42687	0.465995	0.471372	0.840913	0.460863	0.452234
COX7A1	14.4419	2.4341	2.8178e-47	6.24199e-46	0.0611449	AR2	0.370069	0.0356687	0.0732655	0.0377197	0.0333621	0.0796119
HSPA8	29.8479	2.43405	9.33327e-196	3.94843e-193	0.318002	WMAs	1.25132	0.358996	0.358388	0.880251	0.379587	0.375836
MFGE8	23.0086	2.43323	3.82172e-117	1.29722e-115	0.0804598	ARPs	0.418552	0.0918801	0.414018	0.085799	0.218383	0.267872
PDCD5	28.6788	2.43106	7.00493e-181	4.24827e-179	0.13742	ARPs	0.662989	0.160767	0.227002	0.167194	0.183829	0.231562
RLBP1	9.18319	2.43003	4.18505e-20	7.53006e-19	0.0531324	WMAs	0.235086	0.0291759	0.199058	0.0279119	0.0480061	0.211054
DNAJA4	28.7987	2.42918	2.22458e-182	2.56381e-180	0.409951	A0	0.483547	0.148072	0.109261	0.184981	0.136299	0.148511
LPIN3	10.8203	2.42912	2.7595e-27	6.67552e-26	0.0586836	WMAs	0.274349	0.118879	0.14503	0.170172	0.0569604	0.177762
OMG	24.0748	2.42848	4.59037e-128	1.72524e-126	0.0891443	ARPs	0.465628	0.104503	0.351421	0.138045	0.157409	0.251692
RPL38	36.7154	2.42821	4.14987e-295	9.05403e-293	0.252375	AR2	1.07911	0.262127	0.350839	0.230787	0.277458	0.308095
RASL10A	14.4145	2.42806	4.19643e-47	5.64459e-46	0.0487867	ARPs	0.281348	0.0586219	0.252098	0.0561841	0.134191	0.29805
GARS	23.1882	2.42777	5.99192e-119	9.66789e-117	0.199841	WMAs	0.804304	0.269574	0.221757	0.371684	0.206651	0.287274
FAM200B	29.1189	2.42478	2.07005e-186	1.35491e-184	0.134943	SVZCs	0.60854	0.136669	0.273025	0.144983	0.202914	0.28144
DYNLRB1	30.0612	2.42467	1.55861e-198	1.63347e-196	0.153959	AR2	0.691541	0.163425	0.174803	0.147921	0.157468	0.170294
EMX2	23.9263	2.4237	1.63046e-126	3.02463e-124	0.173672	WMAs	0.76511	0.293331	0.489286	0.28335	0.194078	0.499674
PDE4D	52.4477	2.42282	0	0	0.622565	SVZCs	2.64621	0.885971	2.41091	1.23638	2.17051	2.03512
SLC7A11-AS1	8.1814	2.42262	2.80556e-16	4.15208e-15	0.0428232	WMAs	0.214475	0.030891	0.0645925	0.0879179	0.0436501	0.0941825
BMPER	14.3759	2.42239	7.326e-47	3.18869e-45	0.0896114	WMAs	0.465776	0.181322	0.607038	0.140415	0.104962	0.522294
ATP5MD	52.2712	2.42141	0	0	0.787896	A0	1.39594	0.275852	0.449328	0.240658	0.325702	0.413933
METTL5	24.5695	2.42109	2.67809e-133	1.07527e-131	0.099106	ARPs	0.485867	0.110473	0.176323	0.130937	0.154033	0.174769
TPT1	31.2142	2.42107	6.8351e-214	3.70484e-211	0.446471	WMAs	1.68833	0.562646	0.653931	0.61254	0.600765	0.662035
AC005165.1	7.3273	2.42088	2.34834e-13	1.40093e-12	0.0240102	ARPs	0.15276	0.0303554	0.117729	0.0826682	0.0628766	0.0483581
UFC1	20.3565	2.42049	4.06428e-92	1.05295e-90	0.0802043	ARPs	0.414064	0.0914994	0.128071	0.116741	0.0897141	0.141217
FRMD4A	42.3111	2.42049	0	0	0.32848	ARPs	1.5151	0.508678	1.62386	0.42858	1.2049	1.68991
GABRG1	48.9463	2.41721	0	0	0.439951	AR2	1.60493	0.572793	1.10966	1.02305	1.13435	0.556563
RPS24	31.2777	2.41682	9.37914e-215	5.24778e-212	0.451229	WMAs	1.73237	0.457568	0.782566	0.523928	0.626769	0.69451
S100A13	30.5618	2.41677	3.93893e-205	2.95761e-203	0.157088	ARPs	0.761442	0.193713	0.393106	0.15951	0.227887	0.358551
ST13	45.0965	2.41494	0	0	0.345594	ARPs	1.42687	0.465995	0.471372	0.840913	0.460863	0.452234
BRINP3	43.1474	2.41412	0	0	0.342273	ARPs	1.61327	0.561944	1.5187	0.699727	1.23365	0.888559
HERPUD1	19.2785	2.41181	8.13861e-83	7.12951e-81	0.153053	WMAs	0.65242	0.216363	0.179769	0.311494	0.159496	0.245541
LINC00513	41.681	2.41047	0	0	0.298084	ARPs	1.3445	0.427542	0.759742	0.659139	0.611478	1.24974
EPHB1	29.9752	2.41001	2.06499e-197	8.95432e-195	0.359239	WMAs	1.49022	0.693041	1.5514	0.571719	0.498885	1.17329
PDZRN4	9.44517	2.40951	3.54839e-21	4.26815e-20	0.0560292	AR2	0.307669	0.359176	0.256383	1.13975	1.14677	0.0656065
PRR34-AS1	9.01842	2.40944	1.90819e-19	2.16607e-18	0.0299635	AR2	0.148369	0.032873	0.0400781	0.03578	0.0471987	0.0296612
CDS1	26.3622	2.40773	3.71989e-153	1.8048e-151	0.104981	ARPs	0.549441	0.129273	0.444249	0.203087	0.249885	0.358888
DNAJB4	40.9411	2.40713	0	0	0.589759	A0	0.744704	0.191955	0.189363	0.4979	0.179292	0.19554
UQCRH	30.9461	2.40703	2.87037e-210	2.27856e-208	0.148914	ARPs	0.72998	0.184562	0.286918	0.175959	0.2638	0.271529
PCBD1	11.5177	2.40688	1.07378e-30	2.92612e-29	0.0618557	WMAs	0.297741	0.0748235	0.0959087	0.112882	0.0633466	0.0884573
ZCRB1	27.1759	2.40558	1.25131e-162	6.91209e-161	0.119521	SVZCs	0.543016	0.119957	0.247899	0.127612	0.186304	0.215552
RPL23A	37.9364	2.4047	0	0	0.249594	SVZCs	1.08592	0.279522	0.483831	0.315211	0.30916	0.528333
RPL37	40.0031	2.40085	0	0	0.30418	SVZCs	1.23727	0.391455	0.595576	0.380619	0.542255	0.595698
TRMT112	19.002	2.40079	1.64284e-80	7.00123e-79	0.262147	A0	0.296375	0.0526001	0.0632798	0.0739495	0.0367841	0.0734892
ZSCAN31	9.65409	2.40041	4.72334e-22	5.84353e-21	0.0572473	AR2	0.304674	0.0242317	0.138784	0.0353257	0.0390965	0.0652865
THSD4	7.36634	2.39968	1.75379e-13	1.22388e-12	0.023539	SVZCs	0.136999	0.0326749	0.207495	0.0274447	0.0422594	0.248229
EIF2S2	22.3775	2.39846	6.52431e-111	9.08948e-109	0.18636	WMAs	0.717475	0.267531	0.242557	0.314664	0.181495	0.418916
H2AFZ	18.0467	2.39511	8.37658e-73	1.69535e-71	0.0733078	ARPs	0.394084	0.0878527	0.0967186	0.128427	0.0486229	0.120375
NDUFA1	30.9061	2.39488	9.88998e-210	1.17093e-207	0.186114	AR2	0.797947	0.133284	0.198032	0.1259	0.129051	0.208765
S100A1	24.1719	2.39433	4.38984e-129	8.46019e-127	0.240285	WMAs	0.970159	0.3607	0.356269	0.208425	0.271274	0.400493
ST13	60.3338	2.39421	0	0	0.858889	A0	1.42687	0.465995	0.471372	0.840913	0.460863	0.452234
BAG2	12.6177	2.39332	1.68753e-36	5.49676e-35	0.0777161	WMAs	0.331478	0.0997983	0.103668	0.186704	0.0721439	0.0751311
THSD1	13.252	2.39238	4.39605e-40	6.53941e-39	0.0434253	SVZCs	0.218409	0.0545112	0.314741	0.045444	0.0521011	0.193448
MIR4458HG	12.3789	2.39073	3.4003e-35	3.63951e-34	0.0426564	ARPs	0.23084	0.0483261	0.0916261	0.0520984	0.0736393	0.0712933
SHE	7.36593	2.39058	1.7591e-13	1.05577e-12	0.0189017	ARPs	0.112757	0.0225075	0.101868	0.043333	0.0466348	0.0861246
AL627171.2	32.3232	2.38947	3.29825e-229	4.52239e-227	0.21218	AR2	0.871689	0.249366	0.286819	0.273815	0.217498	0.23544
LSM3	21.2973	2.38937	1.20214e-100	5.36019e-99	0.0947625	AR2	0.443774	0.0689628	0.121979	0.0744379	0.104179	0.101305
PCDH9-AS4	15.497	2.38786	3.63206e-54	5.60232e-53	0.0551724	ARPs	0.280584	0.0600472	0.265102	0.108403	0.13648	0.38725
SERPINH1	16.5488	2.38774	1.63372e-61	9.85632e-60	0.12609	WMAs	0.537619	0.253079	0.0604712	0.540263	0.127545	0.1008
BCAM	6.95409	2.38619	3.54832e-12	2.02619e-11	0.0189017	ARPs	0.103767	0.0206999	0.0616347	0.0368962	0.0435578	0.045481
CHRDL1	25.3814	2.38567	4.05047e-142	1.96244e-140	0.0957792	SVZCs	0.485961	0.0990759	0.521851	0.113095	0.107748	0.364902
DNAJB4	32.5343	2.3856	3.48777e-232	3.1508e-230	0.151213	ARPs	0.744704	0.191955	0.189363	0.4979	0.179292	0.19554
TPT1	46.0193	2.38371	0	0	0.448458	SVZCs	1.68833	0.562646	0.653931	0.61254	0.600765	0.662035
DYNLRB1	37.3492	2.38363	2.61111e-305	6.51651e-303	0.540297	A0	0.691541	0.163425	0.174803	0.147921	0.157468	0.170294
ZNF98	37.6953	2.38307	0	0	0.301149	ARPs	1.60289	0.565627	1.64436	0.20199	0.691382	1.43473
RPL26	30.6512	2.38235	2.54707e-206	1.9462e-204	0.165517	ARPs	0.816404	0.216816	0.338185	0.229827	0.219729	0.391543
CDC26	13.5886	2.38222	4.67959e-42	1.77222e-40	0.0904044	WMAs	0.383421	0.0713086	0.126106	0.0883125	0.0858418	0.107283
RPL26L1	10.4348	2.38203	1.71981e-25	1.80898e-24	0.0355114	SVZCs	0.182383	0.0419149	0.0532381	0.0376637	0.042189	0.0557584
CELF2-AS2	14.1778	2.37892	1.25741e-45	1.65163e-44	0.0490421	ARPs	0.255254	0.0543983	0.193644	0.0916704	0.0975053	0.228361
RPL12	31.0015	2.37854	5.14882e-211	4.1155e-209	0.181354	ARPs	0.845357	0.227562	0.348793	0.21509	0.271781	0.300926
DBI	44.9313	2.37842	0	0	0.672389	A0	1.0049	0.468793	0.287452	0.448458	0.297497	0.437671
PRSS35	7.56055	2.37781	4.01353e-14	2.46861e-13	0.0229885	ARPs	0.121354	0.0245213	0.178503	0.0164169	0.0231669	0.0840855
AL590617.2	19.7149	2.37769	1.60693e-86	4.83893e-85	0.0722403	SVZCs	0.357024	0.0983965	0.38341	0.079329	0.208697	0.229372
GSTM5	15.1957	2.37531	3.77796e-52	1.92731e-50	0.111023	WMAs	0.446242	0.140528	0.224868	0.246024	0.102917	0.0892665
ATP5MPL	32.1043	2.37432	3.84362e-226	3.22846e-224	0.158888	SVZCs	0.711388	0.190866	0.304555	0.182295	0.225595	0.340024
EPHA6	30.9092	2.37356	8.99729e-210	4.4588e-207	0.479778	WMAs	2.28217	1.11088	2.28797	1.30888	0.992409	1.89469
TMEM126B	23.6816	2.37206	5.57863e-124	2.04569e-122	0.0996169	ARPs	0.479727	0.112365	0.22249	0.134992	0.14033	0.183724
RORB	47.0805	2.37189	0	0	0.399554	SVZCs	1.66846	0.826932	1.682	0.605138	1.14942	1.18274
AC008892.1	11.2291	2.37184	2.93343e-29	7.57149e-28	0.0697859	WMAs	0.300946	0.0604569	0.103127	0.162947	0.0656374	0.17693
SNRPD1	13.0965	2.37106	3.44721e-39	1.22524e-37	0.0848533	WMAs	0.377636	0.0700609	0.128897	0.07336	0.0849785	0.152467
PDCD5	29.6205	2.36975	8.12633e-193	5.48449e-191	0.149554	SVZCs	0.662989	0.160767	0.227002	0.167194	0.183829	0.231562
ANKRD33B	9.71714	2.36863	2.5483e-22	2.42592e-21	0.0257711	SVZCs	0.160479	0.0403401	0.130767	0.0331499	0.0608619	0.0926262
RXRG	16.6756	2.36783	1.97054e-62	5.54855e-61	0.0594397	AR2	0.292909	0.0686468	0.119509	0.102766	0.0929894	0.0638501
ASF1A	18.5384	2.36782	1.01273e-76	2.13697e-75	0.0643678	ARPs	0.325785	0.0719599	0.177479	0.0880129	0.121648	0.117909
FAM171B	49.0102	2.36689	0	0	0.485824	ARPs	1.93275	0.763342	1.71742	0.954227	0.992551	1.10461
IARS	27.5089	2.3666	1.37263e-166	4.45014e-164	0.334655	WMAs	1.22957	0.477997	0.428123	0.544628	0.384715	0.63906
ENTPD1	25.2151	2.36537	2.73495e-140	1.30503e-138	0.100852	SVZCs	0.495769	0.130721	0.700571	0.117379	0.416867	0.793106
RANBP3L	53.411	2.36315	0	0	0.635504	ARPs	2.60467	1.23395	2.14298	1.56781	1.7015	1.3727
PPID	19.2235	2.36308	2.35209e-82	2.03985e-80	0.146709	WMAs	0.564363	0.14222	0.200265	0.279399	0.137499	0.187648
GABRG1	45.7651	2.36294	0	0	0.390805	ARPs	1.60493	0.572793	1.10966	1.02305	1.13435	0.556563
AC009716.1	8.57635	2.36279	9.79325e-18	6.74732e-17	0.0280971	ARPs	0.149287	0.0308222	0.0643226	0.0541618	0.0426621	0.107493
RPS25	27.2049	2.36275	5.67889e-163	1.74337e-160	0.311657	WMAs	1.21552	0.38511	0.574922	0.40991	0.37924	0.587574
RPS21	28.8848	2.36231	1.85297e-183	1.14377e-181	0.159898	ARPs	0.779269	0.206577	0.281875	0.214858	0.218348	0.280492
TCEAL8	13.4994	2.36202	1.57569e-41	1.91389e-40	0.047765	ARPs	0.239093	0.0512053	0.0845479	0.0577806	0.0520386	0.0769273
AL589740.1	45.0462	2.36124	0	0	0.637548	ARPs	2.79317	1.38231	2.64663	1.87333	1.40439	2.39754
STIP1	33.4046	2.36111	1.17631e-244	1.79763e-242	0.192205	AR2	0.751715	0.278756	0.15853	0.51391	0.204809	0.19731
RPL26	21.3697	2.36091	2.55837e-101	3.0187e-99	0.192704	WMAs	0.816404	0.216816	0.338185	0.229827	0.219729	0.391543
LUCAT1	36.7244	2.36088	2.98464e-295	4.12498e-293	0.220179	ARPs	1.03149	0.301163	0.855795	0.430968	0.241827	1.20623
EIF1AY	9.22205	2.36021	2.91466e-20	5.28816e-19	0.0483743	WMAs	0.231513	0.0428589	0.0889425	0.0649934	0.0494915	0.0741251
AP000229.1	12.669	2.35983	8.78522e-37	9.69645e-36	0.040613	ARPs	0.223306	0.0475925	0.0478747	0.141746	0.112808	0.0182084
SLC7A11	53.2092	2.35915	0	0	0.772158	ARPs	3.08145	1.6198	1.72634	2.16629	1.77935	1.28181
PPP1R3D	18.809	2.35828	6.37239e-79	1.73925e-77	0.0706169	SVZCs	0.317164	0.0867191	0.148677	0.0702612	0.117656	0.129301
ADAM33	18.7219	2.35773	3.28039e-78	1.14369e-76	0.080877	AR2	0.367838	0.0776667	0.13051	0.26845	0.10747	0.0831839
SNRPG	24.1046	2.35682	2.23641e-128	9.7709e-127	0.107346	SVZCs	0.480768	0.0976093	0.148899	0.113786	0.122048	0.168338
ST6GALNAC6	22.4525	2.35639	1.20906e-111	1.69806e-109	0.180809	WMAs	0.694988	0.23389	0.228243	0.320772	0.178982	0.218157
DNAJB4	32.2363	2.35623	5.4801e-228	7.3684e-226	0.188551	AR2	0.744704	0.191955	0.189363	0.4979	0.179292	0.19554
CACNA1B	31.213	2.35614	7.10016e-214	5.44922e-212	0.142248	SVZCs	0.691657	0.254692	0.549561	0.177921	0.493794	0.400733
WNT5B	14.9353	2.35374	1.94183e-50	2.78586e-49	0.0508301	ARPs	0.281697	0.061712	0.218976	0.0934658	0.172458	0.251763
COX7C	52.5806	2.35261	0	0	0.8103	A0	1.46423	0.282724	0.501294	0.264255	0.372695	0.466115
MRPL40	10.8381	2.35257	2.27146e-27	2.51586e-26	0.0377435	SVZCs	0.194842	0.042465	0.0660266	0.0412567	0.0475038	0.0749658
SMIM26	27.9085	2.35234	2.10326e-171	2.21769e-169	0.400349	A0	0.490164	0.0725329	0.116785	0.0759657	0.0672094	0.130698
VAX1	8.26741	2.35226	1.36904e-16	2.05861e-15	0.0420301	WMAs	0.197435	0.0450433	0.138144	0.0952909	0.0418581	0.429634
RBP1	6.91952	2.35211	4.53176e-12	2.57674e-11	0.0209451	ARPs	0.114989	0.0235873	0.0878052	0.0309219	0.0429633	0.0727152
RPL37	37.4969	2.35204	1.03507e-307	1.49611e-305	0.292465	ARPs	1.23727	0.391455	0.595576	0.380619	0.542255	0.595698
RPL23	23.628	2.35182	1.98769e-123	3.50015e-121	0.214909	WMAs	0.882957	0.176264	0.337591	0.196704	0.245134	0.298069
TCEAL9	14.2139	2.35169	7.51539e-46	3.15247e-44	0.0951626	WMAs	0.415606	0.121914	0.102501	0.254077	0.0961767	0.118934
FTH1	45.7643	2.35166	0	0	0.683847	SVZCs	2.65582	1.29017	1.66508	1.27908	1.14591	1.60326
AP000229.1	15.1887	2.35109	4.19877e-52	1.1187e-50	0.212685	A0	0.223306	0.0475925	0.0478747	0.141746	0.112808	0.0182084
RGS3	24.278	2.35012	3.34764e-130	1.28604e-128	0.0888889	ARPs	0.462101	0.10904	0.301119	0.206461	0.262742	0.312041
HSPA5	45.7572	2.3495	0	0	0.702357	A0	1.12411	0.51801	0.341908	0.614103	0.285236	0.551645
FABP7	13.1346	2.34895	2.08525e-39	4.31092e-38	0.192028	A0	0.250187	0.0367929	0.0542968	0.0444278	0.0135666	0.0581237
MT2A	47.5958	2.34846	0	0	0.645698	SVZCs	2.57531	1.60486	1.44059	1.21872	1.41973	2.06579
LSM3	14.7788	2.3469	2.0057e-49	9.37704e-48	0.0999207	WMAs	0.443774	0.0689628	0.121979	0.0744379	0.104179	0.101305
ATP5MF	28.0168	2.34633	1.0131e-172	5.76139e-171	0.137676	ARPs	0.651653	0.166074	0.214302	0.170176	0.1349	0.240684
LDHB	41.2047	2.34613	0	0	0.279949	ARPs	1.16323	0.359583	0.633244	0.431451	0.590796	0.594791
PFDN2	17.7015	2.34521	4.08535e-70	7.99779e-69	0.0669221	ARPs	0.34073	0.0768635	0.104072	0.0831476	0.0842989	0.128615
MIR181A1HG	14.8722	2.34521	4.99174e-50	8.96756e-49	0.0541802	SVZCs	0.284183	0.0910326	0.226056	0.0626771	0.128284	0.090516
ADGRB1	14.2429	2.34511	4.96082e-46	8.23796e-45	0.0472808	SVZCs	0.256267	0.056421	0.216539	0.0558965	0.203132	0.168325
SLC22A3	10.2932	2.34495	7.56312e-25	6.33731e-24	0.0296296	ARPs	0.196531	0.0418584	0.0828279	0.0363788	0.190168	0.0341476
SLIRP	25.8726	2.3449	1.35532e-147	3.48266e-145	0.274385	WMAs	1.01515	0.263418	0.412787	0.310128	0.297432	0.469753
RPL36AL	35.1853	2.34461	3.36096e-271	6.62452e-269	0.518184	A0	0.706282	0.0967316	0.184059	0.087922	0.138406	0.19403
SLC7A5	15.6458	2.34356	3.54861e-55	1.92647e-53	0.0983347	WMAs	0.460316	0.463653	0.11234	0.496738	0.109011	0.224026
WASF3-AS1	8.89391	2.34351	5.89945e-19	4.20144e-18	0.0286079	ARPs	0.157606	0.0330808	0.103382	0.0703801	0.0533104	0.124795
SUGT1	43.0831	2.3416	0	0	0.320817	ARPs	1.29963	0.422888	0.505832	0.701273	0.463305	0.452465
RPL22	31.7777	2.34035	1.31644e-221	1.13038e-219	0.194891	ARPs	0.876816	0.244582	0.354607	0.253898	0.291633	0.324306
NCR3LG1	8.60063	2.3396	7.92765e-18	6.51374e-17	0.0280032	SVZCs	0.132627	0.0325956	0.0988477	0.0276341	0.0830747	0.0856551
CDC26	20.1719	2.33947	1.7272e-90	5.40275e-89	0.0878653	SVZCs	0.383421	0.0713086	0.126106	0.0883125	0.0858418	0.107283
ATP5PD	21.0057	2.33911	5.81998e-98	6.55504e-96	0.17843	WMAs	0.732402	0.113959	0.194708	0.124183	0.193473	0.180022
TCEAL8	9.41237	2.33812	4.85061e-21	9.07593e-20	0.0523394	WMAs	0.239093	0.0512053	0.0845479	0.0577806	0.0520386	0.0769273
ATP5ME	41.3194	2.33801	0	0	0.344702	AR2	1.40814	0.371686	0.531505	0.301391	0.35786	0.476742
NDUFC1	24.2504	2.33735	6.55211e-130	1.29144e-127	0.225218	WMAs	0.875912	0.213205	0.290545	0.223286	0.244696	0.325611
RPS25	37.9007	2.33609	0	0	0.276117	ARPs	1.21552	0.38511	0.574922	0.40991	0.37924	0.587574
AC010624.5	9.22793	2.33594	2.75921e-20	3.38343e-19	0.138784	A0	0.166639	0.0233826	0.0352851	0.020075	0.0200516	0.094833
GRIA2	43.9582	2.33505	0	0	0.374202	ARPs	1.57343	0.56401	1.65493	0.423195	1.07276	1.2939
NACA	27.6308	2.33485	4.7523e-168	1.57007e-165	0.32276	WMAs	1.20428	0.311968	0.484588	0.353595	0.380289	0.421601
LRRC3B	37.4707	2.33443	2.75948e-307	3.72476e-305	0.211851	SVZCs	1.08066	0.533013	1.51868	0.3264	0.399838	1.692
DOCK5	36.8068	2.33379	1.43886e-296	1.73916e-294	0.20901	SVZCs	0.98902	0.552946	0.921738	0.288898	0.973225	0.579664
ATP6V1F	8.18809	2.33302	2.65401e-16	3.93116e-15	0.0428232	WMAs	0.214062	0.082379	0.0894203	0.068722	0.0462862	0.102885
BAG2	17.9442	2.3326	5.32415e-72	1.70698e-70	0.0762485	AR2	0.331478	0.0997983	0.103668	0.186704	0.0721439	0.0751311
COMMD6	41.5071	2.33182	0	0	0.62089	A0	0.887281	0.117226	0.249787	0.145572	0.149657	0.206443
BOLA3	28.1532	2.33178	2.18658e-174	2.3853e-172	0.409078	A0	0.502428	0.0708897	0.121914	0.0512764	0.0833591	0.113198
COMMD2	23.932	2.33142	1.42227e-126	5.29383e-125	0.0975734	ARPs	0.468961	0.11233	0.204139	0.178297	0.143639	0.277935
ADGRB1	13.7472	2.33125	5.29447e-43	6.61379e-42	0.0434227	ARPs	0.256267	0.056421	0.216539	0.0558965	0.203132	0.168325
DNM3	39.842	2.33121	0	0	0.333333	ARPs	1.44891	0.499267	1.23455	0.528462	0.390121	1.30035
RBIS	25.247	2.33077	1.22305e-140	5.31009e-139	0.112133	ARPs	0.522859	0.127979	0.212098	0.205343	0.142016	0.243711
CCT5	17.3201	2.32954	3.31571e-67	2.25533e-65	0.116574	WMAs	0.481643	0.11739	0.144573	0.202548	0.116088	0.1632
FTH1	42.3189	2.32954	0	0	0.645211	ARPs	2.65582	1.29017	1.66508	1.27908	1.14591	1.60326
ATP5PD	37.3411	2.32901	3.52951e-305	8.74563e-303	0.554553	A0	0.732402	0.113959	0.194708	0.124183	0.193473	0.180022
SVBP	10.0286	2.32817	1.14179e-23	9.25656e-23	0.0314176	ARPs	0.172027	0.0366982	0.0579056	0.0504401	0.030845	0.052321
BCO2	21.1694	2.32766	1.82716e-99	2.1128e-97	0.185567	WMAs	0.705006	0.166906	0.215374	0.499027	0.185616	0.138909
CRYZ	17.3086	2.32699	4.05444e-67	2.74704e-65	0.124504	WMAs	0.468111	0.0935527	0.126335	0.189682	0.112415	0.0879618
AC006994.2	34.4987	2.32599	8.39453e-261	1.56563e-258	0.500436	A0	0.627505	0.127211	0.160498	0.296039	0.167356	0.114214
TP53BP2	45.1662	2.32461	0	0	0.357344	ARPs	1.41762	0.485073	1.02784	0.647718	0.787829	1.06934
ARHGAP5-AS1	12.6883	2.32403	6.86459e-37	7.59351e-36	0.0436782	ARPs	0.216303	0.0470986	0.107774	0.0962448	0.0588849	0.0683355
CA12	10.8754	2.32371	1.50992e-27	1.67936e-26	0.0334821	SVZCs	0.188617	0.133061	0.214421	0.0406277	0.367801	0.230885
NDUFS5	21.1676	2.32307	1.89911e-99	2.18871e-97	0.187153	WMAs	0.770733	0.184778	0.222176	0.181812	0.208709	0.247048
DBI	24.6519	2.32126	3.51013e-134	7.33532e-132	0.249802	WMAs	1.0049	0.468793	0.287452	0.448458	0.297497	0.437671
OST4	14.6766	2.31938	9.10353e-49	4.20508e-47	0.104679	WMAs	0.456899	0.137408	0.181083	0.137283	0.109786	0.237405
AL589740.1	32.4015	2.31888	2.61045e-230	1.88659e-227	0.697066	WMAs	2.79317	1.38231	2.64663	1.87333	1.40439	2.39754
UQCRQ	15.6974	2.317	1.57544e-55	8.57957e-54	0.117367	WMAs	0.497737	0.126277	0.172355	0.126237	0.121722	0.225043
AC016723.1	8.97791	2.31693	2.75965e-19	1.98122e-18	0.0306513	ARPs	0.148757	0.0316822	0.142763	0.0361581	0.0354594	0.204665
NTM-AS1	13.7278	2.31684	6.91677e-43	8.60936e-42	0.0521073	ARPs	0.258561	0.057534	0.238893	0.104072	0.107074	0.282742
RPL30	36.1002	2.31602	2.24984e-285	4.53762e-283	0.3162	AR2	1.20625	0.305242	0.426525	0.324328	0.309638	0.385334
PRELP	12.7491	2.3157	3.15469e-37	3.51094e-36	0.0452107	ARPs	0.231663	0.0510395	0.143292	0.10244	0.0755131	0.0732321
GARS	40.2995	2.3147	0	0	0.601106	A0	0.804304	0.269574	0.221757	0.371684	0.206651	0.287274
AC245407.2	8.77452	2.31442	1.7164e-18	1.4417e-17	0.0296266	SVZCs	0.150826	0.0184209	0.0293567	0.0322044	0.0292129	0.0122388
ABHD3	40.051	2.3136	0	0	0.291954	ARPs	1.29654	0.428138	0.570567	0.523187	0.592918	0.468781
LINC00903	12.334	2.31323	5.93916e-35	6.31025e-34	0.0475096	ARPs	0.233162	0.0514862	0.194918	0.0751378	0.0930628	0.298729
DNAJB6	48.1229	2.31275	0	0	0.448721	AR2	1.48119	0.560546	0.560138	0.992648	0.597525	0.521157
CCT5	24.7427	2.3125	3.71466e-135	1.52139e-133	0.103704	ARPs	0.481643	0.11739	0.144573	0.202548	0.116088	0.1632
CTH	19.6751	2.31228	3.52613e-86	8.41275e-85	0.0799489	ARPs	0.391791	0.0921865	0.228052	0.159062	0.253681	0.205753
RIDA	33.2554	2.3121	1.70708e-242	1.67758e-240	0.179566	ARPs	0.7917	0.217592	0.504681	0.221014	0.513122	0.38116
POLR2J	14.3535	2.31129	1.01319e-46	4.36616e-45	0.107851	WMAs	0.433555	0.130218	0.152385	0.139793	0.103774	0.159891
RSL24D1	13.1737	2.31121	1.24279e-39	4.45375e-38	0.0919905	WMAs	0.381065	0.0921049	0.112682	0.136057	0.0893474	0.15236
PPID	27.2873	2.31088	6.00476e-164	3.17055e-162	0.125926	ARPs	0.564363	0.14222	0.200265	0.279399	0.137499	0.187648
ETNPPL	46.1546	2.31042	0	0	0.502682	ARPs	2.14628	0.925331	2.14818	1.03184	1.90503	1.30826
CSTB	37.5954	2.31025	0	5.87811e-307	0.309379	AR2	1.20723	0.261217	0.336586	0.262194	0.215447	0.387066
MRPL40	10.3772	2.31005	3.14952e-25	2.6648e-24	0.0360153	ARPs	0.194842	0.042465	0.0660266	0.0412567	0.0475038	0.0749658
ATP5MF	29.0949	2.30809	4.16269e-186	2.71436e-184	0.148336	SVZCs	0.651653	0.166074	0.214302	0.170176	0.1349	0.240684
FAM13A	46.0463	2.30688	0	0	0.426309	AR2	1.52802	0.7416	0.979322	1.08181	1.03365	0.547765
PET100	11.8574	2.30674	1.97018e-32	5.68126e-31	0.074544	WMAs	0.337012	0.0784352	0.111001	0.0683133	0.0778861	0.115518
AP000962.1	11.289	2.30527	1.48733e-29	1.39674e-28	0.0408685	ARPs	0.196512	0.0429965	0.146221	0.115392	0.0849266	0.203755
HEPN1	37.6445	2.30442	0	0	0.255683	ARPs	1.09635	0.338975	0.856448	0.544639	0.464279	0.864467
RPS23	24.4289	2.30423	8.43816e-132	1.69202e-129	0.275178	WMAs	1.10789	0.301789	0.428779	0.302171	0.344013	0.428392
AC055733.2	7.90507	2.30384	2.67785e-15	3.73972e-14	0.0467883	WMAs	0.220268	0.0361801	0.0830502	0.080524	0.0486985	0.152828
STIP1	23.1725	2.3017	8.61695e-119	1.37752e-116	0.201427	WMAs	0.751715	0.278756	0.15853	0.51391	0.204809	0.19731
ATP5MPL	30.134	2.30166	1.73999e-199	1.24198e-197	0.157599	ARPs	0.711388	0.190866	0.304555	0.182295	0.225595	0.340024
CYB5A	20.3544	2.30117	4.24014e-92	1.09769e-90	0.0840358	ARPs	0.398112	0.0946004	0.221189	0.0958435	0.118663	0.592278
PDE3B	11.3035	2.30101	1.26056e-29	1.48435e-28	0.0529627	SVZCs	0.296794	0.141052	0.320075	0.0677676	0.231027	0.182555
LINC00645	11.9791	2.30089	4.57398e-33	7.6727e-32	0.0725944	AR2	0.378589	0.0197264	0.252754	0.0296441	0.279348	0.0892893
RPS21	29.6373	2.29942	4.94801e-193	3.34594e-191	0.180804	SVZCs	0.779269	0.206577	0.281875	0.214858	0.218348	0.280492
BUD31	11.6916	2.29828	1.40761e-31	1.38486e-30	0.0426564	ARPs	0.208677	0.0460972	0.070168	0.0689451	0.0584488	0.109737
SLC7A5	27.0158	2.29772	9.62885e-161	9.17651e-159	0.392784	A0	0.460316	0.463653	0.11234	0.496738	0.109011	0.224026
PET100	16.9165	2.2962	3.40221e-64	6.14702e-63	0.0699872	ARPs	0.337012	0.0784352	0.111001	0.0683133	0.0778861	0.115518
AL627171.2	31.4221	2.29611	1.01027e-216	8.38429e-215	0.192593	ARPs	0.871689	0.249366	0.286819	0.273815	0.217498	0.23544
GTF2A2	21.1987	2.2952	9.82687e-100	2.76924e-98	0.0886335	ARPs	0.424283	0.102264	0.137804	0.117336	0.110505	0.147621
AL713852.1	16.7225	2.29467	8.98981e-63	2.01718e-61	0.0637175	SVZCs	0.287205	0.0796064	0.285129	0.0656085	0.137356	0.187701
ZBTB20-AS2	8.69418	2.29409	3.49339e-18	2.43443e-17	0.0316731	ARPs	0.157768	0.0342515	0.118812	0.0942651	0.071824	0.135969
HIST1H4C	13.2484	2.29229	4.61159e-40	1.67866e-38	0.0935765	WMAs	0.394458	0.121672	0.193971	0.16109	0.0941493	0.190605
CALM1	35.6997	2.28889	3.99266e-279	4.94662e-276	0.597145	WMAs	1.96385	0.881987	1.13544	1.13667	0.812586	1.12221
RPL26	31.3523	2.28853	9.05673e-216	7.04435e-214	0.183442	SVZCs	0.816404	0.216816	0.338185	0.229827	0.219729	0.391543
MT-ND3	42.366	2.28807	0	0	0.488916	AR2	1.89313	1.62488	1.4849	0.815829	1.2759	0.767701
SOX1-OT	7.45376	2.28795	9.07152e-14	5.50255e-13	0.0229885	ARPs	0.145801	0.0316357	0.0683395	0.145178	0.0965129	0.0465971
LMO2	7.55444	2.28793	4.20653e-14	5.46534e-13	0.0428232	WMAs	0.223667	0.148591	0.111307	0.158778	0.0500524	0.403734
RIDA	34.6718	2.28703	2.09531e-263	2.17623e-261	0.193994	SVZCs	0.7917	0.217592	0.504681	0.221014	0.513122	0.38116
SLC10A1	9.19991	2.2836	3.58262e-20	4.17191e-19	0.0406821	AR2	0.165743	0.0097359	0.0403548	0.0364247	0.0192148	0.0363557
CA8	31.5337	2.28344	2.99725e-218	1.76228e-215	0.438541	WMAs	1.77141	0.815487	1.54587	0.874944	0.694253	1.55359
SAT1	39.5969	2.28306	0	0	0.302937	ARPs	1.29284	0.433766	1.13784	0.366879	0.682077	1.36276
CALM2	49.7023	2.28296	0	0	0.624266	ARPs	2.35963	1.08853	1.43431	1.36643	1.41278	1.51421
NQO1	25.4168	2.28289	1.64384e-142	1.10728e-140	0.14056	AR2	0.584223	0.100324	0.192691	0.0947182	0.0928885	0.151066
MRPS18C	15.9186	2.28273	4.71109e-57	2.64019e-55	0.123711	WMAs	0.482338	0.12104	0.181167	0.141133	0.119902	0.187632
XAF1	17.8138	2.2827	5.52454e-71	1.37776e-69	0.0594562	SVZCs	0.305523	0.110155	0.330797	0.0708654	0.249371	0.410468
PON2	55.6993	2.28184	0	0	0.665645	ARPs	2.44315	1.15091	1.90822	1.45947	1.57082	1.56377
CYB5A	21.1505	2.28143	2.73105e-99	9.32483e-98	0.0903003	SVZCs	0.398112	0.0946004	0.221189	0.0958435	0.118663	0.592278
SLC10A1	9.73645	2.28081	2.10798e-22	2.01006e-21	0.0377435	SVZCs	0.165743	0.0097359	0.0403548	0.0364247	0.0192148	0.0363557
MIR4458HG	12.7264	2.27955	4.2158e-37	5.88989e-36	0.0464692	SVZCs	0.23084	0.0483261	0.0916261	0.0520984	0.0736393	0.0712933
RPL22	32.7745	2.27942	1.35826e-235	1.21752e-233	0.213271	SVZCs	0.876816	0.244582	0.354607	0.253898	0.291633	0.324306
LMO3	47.6015	2.27931	0	0	0.533078	ARPs	2.1267	0.924944	2.03712	1.13217	1.53538	1.22266
JDP2	48.9504	2.27926	0	0	0.726797	A0	1.08045	0.481806	0.337106	0.707408	0.390806	0.187304
MICOS10	20.0503	2.2782	2.00823e-89	1.9624e-87	0.181602	WMAs	0.707291	0.168478	0.314372	0.198449	0.192295	0.290845
BTF3	14.3652	2.27698	8.55959e-47	3.7163e-45	0.108644	WMAs	0.431386	0.121613	0.154813	0.150601	0.105523	0.187012
AL445426.1	37.3198	2.27668	7.84233e-305	1.03049e-302	0.264813	SVZCs	1.22386	0.564093	0.922782	0.402363	0.965469	0.642083
SLIRP	37.6222	2.27498	0	1.27858e-307	0.259537	SVZCs	1.01515	0.263418	0.412787	0.310128	0.297432	0.469753
NDUFC2	17.4876	2.27495	1.7817e-68	1.2436e-66	0.140365	WMAs	0.571865	0.157034	0.194428	0.16825	0.147921	0.203369
MRPS33	15.9152	2.27463	4.97236e-57	7.98201e-56	0.0628352	ARPs	0.308936	0.0721417	0.115655	0.0815059	0.0787246	0.11441
UQCR10	29.1134	2.27361	2.42818e-186	1.53711e-184	0.163474	ARPs	0.746465	0.206578	0.332743	0.171791	0.157895	0.393887
RPS21	19.8333	2.27357	1.53499e-87	1.45092e-85	0.185567	WMAs	0.779269	0.206577	0.281875	0.214858	0.218348	0.280492
AC092969.1	10.3362	2.27293	4.83282e-25	4.06721e-24	0.0372925	ARPs	0.190033	0.0423925	0.186212	0.0489408	0.0526515	0.172024
CPEB3	50.3093	2.27228	0	0	0.494927	SVZCs	1.8513	0.813224	1.50936	0.74726	1.21978	0.903928
AL137139.2	23.9429	2.27179	1.09438e-126	2.04108e-124	0.272006	WMAs	1.49904	1.40066	1.45137	1.72434	0.542369	0.911665
RPS13	29.8075	2.27143	3.12169e-195	2.13172e-193	0.180332	ARPs	0.823991	0.235098	0.324101	0.24612	0.191833	0.365092
SLC5A3	31.8375	2.27099	1.96111e-222	1.2836e-219	0.424266	WMAs	1.44109	0.518244	0.540142	1.10787	0.511769	0.341294
HOPX	26.4852	2.27027	1.43538e-154	7.0529e-153	0.134866	ARPs	0.667593	0.179677	0.426582	0.105552	0.404825	0.697423
CDH10	39.4	2.26886	0	0	0.359074	AR2	1.38702	0.39185	1.05667	0.540247	0.97873	0.48433
COX20	35.0521	2.26852	3.61829e-269	4.25486e-267	0.228863	ARPs	0.952614	0.285559	0.522638	0.307594	0.384533	0.426167
MRPS18C	22.9581	2.26826	1.2218e-116	4.13103e-115	0.103704	ARPs	0.482338	0.12104	0.181167	0.141133	0.119902	0.187632
EPHX1	44.1527	2.26805	0	0	0.331575	SVZCs	1.23875	0.43016	0.722863	0.411391	0.687767	0.447923
NUPR1	24.0568	2.26679	7.07949e-128	1.33471e-125	0.252974	WMAs	0.985334	0.496305	0.247947	0.690098	0.299232	0.34904
TNNT1	13.2662	2.26602	3.6357e-40	7.6253e-39	0.199884	A0	0.272949	0.00584987	0.0632063	0.00354033	0.0128813	0.0477866
RSL24D1	18.8672	2.26534	2.12073e-79	4.63566e-78	0.0827586	ARPs	0.381065	0.0921049	0.112682	0.136057	0.0893474	0.15236
SPRED1	47.7218	2.26397	0	0	0.415787	SVZCs	1.53465	0.645338	1.35398	0.564051	0.91522	1.54519
SEM1	49.4091	2.26283	0	0	0.533496	AR2	1.83426	0.777298	1.03501	0.967617	0.919188	0.740078
NDUFA12	41.9383	2.26204	0	0	0.645039	A0	0.943855	0.130598	0.283133	0.173869	0.20263	0.244018
UBL5	25.3344	2.26132	1.33398e-141	5.88001e-140	0.128736	ARPs	0.598037	0.15763	0.195409	0.13534	0.164715	0.280471
UQCRQ	23.3966	2.26113	4.62555e-121	1.92168e-119	0.109172	SVZCs	0.497737	0.126277	0.172355	0.126237	0.121722	0.225043
RPL36AL	27.4225	2.26108	1.47708e-165	1.20565e-163	0.170767	AR2	0.706282	0.0967316	0.184059	0.087922	0.138406	0.19403
UQCRQ	22.3473	2.26065	1.2825e-110	4.07044e-109	0.106769	ARPs	0.497737	0.126277	0.172355	0.126237	0.121722	0.225043
CHCHD1	10.2056	2.26064	1.87244e-24	1.55544e-23	0.0367816	ARPs	0.184006	0.0412936	0.0728326	0.0489862	0.0578513	0.0825458
AC006994.2	18.8922	2.26055	1.32181e-79	1.09698e-77	0.164155	WMAs	0.627505	0.127211	0.160498	0.296039	0.167356	0.114214
UQCRB	50.9581	2.25993	0	0	0.814664	A0	1.51238	0.253328	0.553064	0.249132	0.463208	0.380487
RXRG	16.5427	2.25983	1.80796e-61	3.12653e-60	0.056705	ARPs	0.292909	0.0686468	0.119509	0.102766	0.0929894	0.0638501
VILL	8.04927	2.25975	8.32893e-16	5.43818e-15	0.0270754	ARPs	0.145281	0.0321283	0.086499	0.044125	0.0310604	0.0627288
ZDHHC11	14.8145	2.25934	1.18117e-49	2.72439e-48	0.0587089	AR2	0.247579	0.0825112	0.0862323	0.168525	0.0684338	0.0570184
SALL3	34.5028	2.25933	7.28198e-261	8.09654e-259	0.196679	ARPs	0.847651	0.245816	0.510695	0.356699	0.417312	0.333777
MAL	21.939	2.25887	1.10388e-106	4.04797e-105	0.0882711	SVZCs	0.402532	0.150189	0.293465	0.0985317	0.220687	0.216344
PRR34-AS1	8.81026	2.25879	1.24859e-18	8.80713e-18	0.0311622	ARPs	0.148369	0.032873	0.0400781	0.03578	0.0471987	0.0296612
TPT1	54.2628	2.25639	0	0	0.868199	A0	1.68833	0.562646	0.653931	0.61254	0.600765	0.662035
UBC	55.6378	2.25632	0	0	0.86849	A0	1.53151	1.2643	0.564612	1.91721	1.16714	0.815483
TCEAL9	24.6277	2.25517	6.37924e-134	4.93964e-132	0.358743	A0	0.415606	0.121914	0.102501	0.254077	0.0961767	0.118934
AL121820.2	10.5468	2.25457	5.2568e-26	1.21168e-24	0.0674068	WMAs	0.29036	0.0337089	0.136548	0.0804919	0.0682216	0.118277
TFCP2L1	10.5127	2.2545	7.54738e-26	8.01404e-25	0.0336851	SVZCs	0.170969	0.0541189	0.163246	0.0383307	0.245822	0.0966124
SELENOK	22.7833	2.25312	6.71845e-115	2.23454e-113	0.105747	ARPs	0.502043	0.128208	0.174823	0.153508	0.136953	0.177343
RPL35A	25.1084	2.25248	4.02527e-139	9.24745e-137	0.297383	WMAs	1.0986	0.254228	0.401781	0.285953	0.35046	0.405366
AC007389.1	40.6732	2.2522	0	0	0.315138	SVZCs	1.40102	0.720366	1.33228	0.496017	1.18529	1.21118
PAPOLA	47.5775	2.2509	0	0	0.44751	ARPs	1.65118	0.634007	0.895613	1.00942	0.785692	0.840044
H2AFZ	21.632	2.2499	8.98897e-104	5.11193e-102	0.315973	A0	0.394084	0.0878527	0.0967186	0.128427	0.0486229	0.120375
TCP1	32.9628	2.2497	2.76982e-238	4.59737e-236	0.484143	A0	0.553638	0.150451	0.14454	0.315209	0.108789	0.177295
SNRPG	15.5998	2.24962	7.30728e-55	3.93617e-53	0.128469	WMAs	0.480768	0.0976093	0.148899	0.113786	0.122048	0.168338
DDIT3	21.3408	2.24941	4.74897e-101	1.35813e-99	0.105747	ARPs	0.502832	0.128759	0.112362	0.21081	0.0792348	0.174977
SEMA4A	14.1321	2.24836	2.40896e-45	3.93627e-44	0.0440341	SVZCs	0.220096	0.0788333	0.277134	0.0505174	0.136746	0.142152
SEC61G	34.395	2.24811	2.99693e-259	5.52997e-257	0.515275	A0	0.644266	0.123877	0.174303	0.130401	0.1224	0.192809
FABP7	10.3492	2.24791	4.22128e-25	5.72687e-24	0.0572473	AR2	0.250187	0.0367929	0.0542968	0.0444278	0.0135666	0.0581237
SLC5A3	42.5494	2.24778	0	0	0.359642	ARPs	1.44109	0.518244	0.540142	1.10787	0.511769	0.341294
UBB	44.4192	2.24743	0	0	0.677044	A0	0.933104	0.312449	0.281281	0.539169	0.207558	0.311363
MTHFD2	18.5209	2.24739	1.40074e-76	5.66336e-75	0.272621	A0	0.3257	0.10323	0.0779629	0.108111	0.207145	0.169743
HMGB1	61.2231	2.24738	0	0	0.87503	AR2	2.97792	1.6954	1.83896	1.99162	1.93202	1.59476
RPL27	17.7718	2.24682	1.1685e-70	8.44486e-69	0.157018	WMAs	0.594024	0.165231	0.242574	0.174276	0.157793	0.275845
MRPS21	29.0612	2.24609	1.11007e-185	6.97615e-184	0.152746	ARPs	0.667154	0.182303	0.29879	0.205165	0.226038	0.321555
RPL34	34.0387	2.24435	5.95837e-254	6.39925e-252	0.256705	ARPs	1.08827	0.34754	0.50999	0.353439	0.488958	0.461836
VAX1	11.6351	2.24414	2.73145e-31	2.6744e-30	0.040613	ARPs	0.197435	0.0450433	0.138144	0.0952909	0.0418581	0.429634
LHFPL1	7.17226	2.2424	7.3772e-13	4.31487e-12	0.0245211	ARPs	0.11946	0.0264627	0.159227	0.031182	0.0820281	0.0906342
LSAMP-AS1	18.1466	2.24236	1.36565e-73	2.78345e-72	0.0766284	ARPs	0.351718	0.0853351	0.295168	0.168453	0.155168	0.389179
SLC8A1-AS1	8.80073	2.24109	1.35929e-18	2.26593e-17	0.0483743	WMAs	0.243424	0.0667162	0.308178	0.0586959	0.0566627	0.371005
TOMM5	27.2696	2.24064	9.72501e-164	9.55696e-162	0.398894	A0	0.481457	0.0714497	0.122974	0.080977	0.0837804	0.124371
HSP90AB1	57.4745	2.23921	0	0	0.872272	A0	1.46262	0.738599	0.532159	1.18819	0.631975	0.659161
DIAPH3	25.0624	2.23869	1.27878e-138	5.43637e-137	0.115709	ARPs	0.567645	0.150055	0.425939	0.351066	0.29001	0.124433
APOA1-AS	7.6612	2.2384	1.84209e-14	1.14561e-13	0.0280971	ARPs	0.132025	0.0294714	0.0804788	0.0610807	0.0497885	0.0966452
ALDH1L2	15.4219	2.23508	1.16637e-53	3.2036e-52	0.226942	A0	0.26982	0.0990622	0.0637155	0.129987	0.0552471	0.0783995
AC097537.1	12.6417	2.23468	1.24321e-36	1.36695e-35	0.0469987	ARPs	0.21741	0.0503117	0.229249	0.102525	0.0837532	0.299314
C19orf53	9.88443	2.23333	4.86349e-23	9.84907e-22	0.0666138	WMAs	0.281112	0.0914772	0.0986467	0.0968878	0.0667538	0.124266
TPT1	43.0637	2.23214	0	0	0.515225	AR2	1.68833	0.562646	0.653931	0.61254	0.600765	0.662035
STXBP5	53.9815	2.22995	0	0	0.676884	ARPs	2.47725	1.20157	2.11411	1.33663	1.96305	1.80108
MIAT	31.1588	2.22976	3.85169e-213	3.1365e-211	0.155811	ARPs	0.752699	0.214593	0.705824	0.281272	0.438902	0.662278
PRDX1	39.0331	2.22969	0	0	0.33715	AR2	1.23956	0.352743	0.431379	0.436366	0.327173	0.420831
MICOS10	29.6665	2.22817	2.07961e-193	1.40902e-191	0.171672	SVZCs	0.707291	0.168478	0.314372	0.198449	0.192295	0.290845
PRDM16-DT	31.6788	2.22758	3.04151e-220	2.44803e-218	0.166396	SVZCs	0.69222	0.243439	0.773602	0.193196	0.234818	0.725694
PFDN2	17.976	2.22724	3.00341e-72	7.59944e-71	0.078125	SVZCs	0.34073	0.0768635	0.104072	0.0831476	0.0842989	0.128615
RPS25	38.7693	2.22698	0	0	0.315138	SVZCs	1.21552	0.38511	0.574922	0.40991	0.37924	0.587574
DNM3	41.0377	2.22637	0	0	0.370739	SVZCs	1.44891	0.499267	1.23455	0.528462	0.390121	1.30035
ROBO1	41.4713	2.22595	0	0	0.357344	ARPs	1.46347	0.536421	1.36573	0.573672	0.684837	1.40106
EPHB2	8.61863	2.22593	6.7762e-18	1.09232e-16	0.0555115	WMAs	0.22883	0.107144	0.177003	0.0600697	0.0535065	0.233823
SYCP3	17.5202	2.22505	1.00542e-68	1.93124e-67	0.0784163	ARPs	0.335544	0.0818371	0.228128	0.131472	0.151941	0.317371
COL23A1	13.8192	2.2247	1.95347e-43	3.10141e-42	0.0489042	SVZCs	0.251695	0.086603	0.29067	0.0594299	0.351531	0.26404
RPL26L1	9.6397	2.22466	5.43487e-22	4.20557e-21	0.0390805	ARPs	0.182383	0.0419149	0.0532381	0.0376637	0.042189	0.0557584
HERPUD1	32.5723	2.22416	1.01314e-232	1.62712e-230	0.498691	A0	0.65242	0.216363	0.179769	0.311494	0.159496	0.245541
TOMM5	21.7309	2.22332	1.04778e-104	4.92514e-103	0.117174	AR2	0.481457	0.0714497	0.122974	0.080977	0.0837804	0.124371
NDUFS5	36.6983	2.22279	7.76828e-295	1.79654e-292	0.561536	A0	0.770733	0.184778	0.222176	0.181812	0.208709	0.247048
COL5A3	41.0471	2.22225	0	0	0.366274	SVZCs	1.41513	0.77997	1.24841	0.511626	0.717933	0.940195
SUGT1	43.6417	2.22118	0	0	0.392692	AR2	1.29963	0.422888	0.505832	0.701273	0.463305	0.452465
PDCD5	19.041	2.22055	7.80023e-81	6.6484e-79	0.181602	WMAs	0.662989	0.160767	0.227002	0.167194	0.183829	0.231562
LINC00844	26.6801	2.21922	8.01981e-157	4.01454e-155	0.150192	ARPs	0.691482	0.193956	0.241122	0.269653	0.309913	0.165647
AC007262.2	36.7347	2.21637	2.0401e-295	4.5077e-293	0.283557	AR2	1.15715	0.508389	0.778141	0.656244	0.710227	0.384774
RPL34	35.4451	2.21556	3.45526e-275	3.80517e-273	0.268872	SVZCs	1.08827	0.34754	0.50999	0.353439	0.488958	0.461836
POMP	41.5769	2.21545	0	0	0.644457	A0	0.925245	0.186338	0.283539	0.201682	0.222168	0.295337
DISP1	33.4864	2.21545	7.59478e-246	7.72618e-244	0.233206	ARPs	1.00637	0.317523	0.771446	0.473846	0.613402	0.50654
SLITRK2	31.4606	2.21516	3.00428e-217	2.3686e-215	0.168628	SVZCs	0.664923	0.124022	0.514693	0.18513	0.362453	0.37834
EPB41L4A	11.6587	2.21504	2.07248e-31	5.76538e-30	0.0674068	WMAs	0.355029	0.293877	0.308491	0.434501	0.0878275	0.426948
RPS24	42.9894	2.21455	0	0	0.521803	AR2	1.73237	0.457568	0.782566	0.523928	0.626769	0.69451
PRDX5	14.2328	2.21435	5.73753e-46	2.41547e-44	0.119746	WMAs	0.46336	0.152889	0.146075	0.152786	0.119565	0.168623
KY	17.2592	2.21264	9.5455e-67	2.8546e-65	0.0755177	AR2	0.308189	0.26804	0.145685	0.341282	0.238248	0.0749894
AL161430.1	9.07117	2.21216	1.17745e-19	8.53445e-19	0.0321839	ARPs	0.156444	0.0358947	0.0689616	0.0871212	0.048548	0.110424
SMIM30	8.0076	2.21161	1.16966e-15	1.66635e-14	0.0555115	WMAs	0.207984	0.0523018	0.0769253	0.0604405	0.0487073	0.0535617
EFCAB7	30.767	2.21094	7.2467e-208	5.6365e-206	0.170881	ARPs	0.704941	0.199768	0.354528	0.423396	0.314967	0.30915
SESN2	18.0822	2.21077	4.39883e-73	1.67503e-71	0.270585	A0	0.311715	0.131862	0.0760459	0.102717	0.0848842	0.113709
RPL38	43.68	2.20825	0	0	0.690137	A0	1.07911	0.262127	0.350839	0.230787	0.277458	0.308095
SLC4A4	50.2162	2.20773	0	0	0.63961	SVZCs	2.48057	1.57416	2.70199	1.21491	2.51387	2.66586
AC021055.1	8.09188	2.20732	5.87513e-16	3.85708e-15	0.0260536	ARPs	0.134452	0.0306859	0.121993	0.0425339	0.0742619	0.0746934
SUMO2	20.2631	2.20682	2.72342e-91	2.76244e-89	0.200634	WMAs	0.686571	0.204373	0.261719	0.215684	0.193732	0.269754
PFDN2	11.8942	2.20656	1.26895e-32	3.68986e-31	0.0840603	WMAs	0.34073	0.0768635	0.104072	0.0831476	0.0842989	0.128615
MRPL18	11.12	2.20633	1.00289e-28	2.54314e-27	0.0793021	WMAs	0.300711	0.0777109	0.0919765	0.122481	0.0732661	0.108862
SMIM2-AS1	11.2502	2.20275	2.30999e-29	2.15935e-28	0.0429119	ARPs	0.211601	0.0499225	0.0841655	0.0710068	0.100693	0.0550782
AHSA1	19.2888	2.20235	6.67469e-83	5.90676e-81	0.153846	WMAs	0.572567	0.163319	0.156479	0.265286	0.155223	0.193051
ENTPD1	23.2863	2.20022	6.11014e-120	2.14753e-118	0.104981	ARPs	0.495769	0.130721	0.700571	0.117379	0.416867	0.793106
HPSE2	38.9419	2.19919	0	0	0.614815	ARPs	2.90651	1.56144	2.64441	1.83682	3.54789	1.78088
AKR1C3	17.5785	2.1991	3.59724e-69	6.93653e-68	0.0730524	ARPs	0.331927	0.0822498	0.169472	0.127844	0.0954712	0.0994746
COX17	25.3136	2.19815	2.26238e-141	1.4949e-139	0.14592	AR2	0.582165	0.107094	0.167401	0.129421	0.128102	0.158827
ACPP	9.91992	2.19756	3.4103e-23	2.72588e-22	0.0444444	ARPs	0.233301	0.055703	0.0377903	0.138818	0.0684547	0.0120834
RPS13	30.6222	2.19706	6.20248e-206	4.54892e-204	0.196429	SVZCs	0.823991	0.235098	0.324101	0.24612	0.191833	0.365092
MRPL36	11.2592	2.1959	2.08611e-29	2.43907e-28	0.0480925	SVZCs	0.212644	0.0339647	0.0689512	0.0504217	0.0365956	0.0841695
FAM199X	30.8825	2.19521	2.05383e-209	1.61559e-207	0.185696	ARPs	0.738997	0.214185	0.473967	0.273077	0.473007	0.386574
COA6	19.9057	2.19468	3.62879e-88	1.70342e-86	0.291533	A0	0.327832	0.0477317	0.0813453	0.0583231	0.0588219	0.0848525
PPM1K	44.9333	2.19412	0	0	0.453895	ARPs	1.68126	0.670632	1.14276	0.938481	1.01018	0.671059
NRP1	11.1747	2.19355	5.42342e-29	1.38745e-27	0.0602696	WMAs	0.317863	0.16881	0.680737	0.020935	0.0786286	1.30623
TSPAN7	40.7728	2.19341	0	0	0.303571	SVZCs	1.20535	0.468368	1.34297	0.412873	0.661185	1.16106
PPM1K	47.7745	2.19286	0	0	0.517174	AR2	1.68126	0.670632	1.14276	0.938481	1.01018	0.671059
UBL5	17.3705	2.19265	1.38065e-67	9.50016e-66	0.149088	WMAs	0.598037	0.15763	0.195409	0.13534	0.164715	0.280471
LRP4-AS1	15.5084	2.19254	3.04249e-54	1.62376e-52	0.131642	WMAs	0.479534	0.0750128	0.396139	0.127708	0.12629	0.302122
OBI1-AS1	52.6248	2.19252	0	0	0.760552	SVZCs	3.25352	2.02225	3.4995	1.86304	3.05007	2.92285
PCDH9-AS3	7.41176	2.19209	1.24635e-13	7.5232e-13	0.0283525	ARPs	0.126165	0.0290018	0.11891	0.0487799	0.0560717	0.157752
AKAP12	31.7385	2.19163	4.58126e-221	3.92405e-219	0.16092	ARPs	0.7837	0.231428	0.746118	0.162592	0.164128	1.09622
COMMD8	7.76075	2.19149	8.44264e-15	5.3163e-14	0.0280971	ARPs	0.135436	0.0312583	0.0616917	0.0433146	0.0383227	0.0593389
THSD1	8.44281	2.19032	3.09798e-17	4.83441e-16	0.0539255	WMAs	0.218409	0.0545112	0.314741	0.045444	0.0521011	0.193448
RPL22L1	8.62591	2.19019	6.35868e-18	4.40021e-17	0.0326948	ARPs	0.161178	0.037607	0.0730173	0.0529116	0.0353193	0.0867629
AHSA1	34.2602	2.1898	3.07315e-257	5.58154e-255	0.508001	A0	0.572567	0.163319	0.156479	0.265286	0.155223	0.193051
RPS4X	16.2923	2.18953	1.11976e-59	6.5838e-58	0.145916	WMAs	0.575531	0.200221	0.303466	0.205698	0.157493	0.301267
EPHX1	40.7322	2.1892	0	0	0.326181	ARPs	1.23875	0.43016	0.722863	0.411391	0.687767	0.447923
CAP2	27.5732	2.18895	2.33372e-167	2.38811e-165	0.410532	A0	0.506784	0.367143	0.135171	0.547355	0.188266	0.0922822
SLC8A1-AS1	12.9884	2.18875	1.42443e-38	2.05035e-37	0.0480925	SVZCs	0.243424	0.0667162	0.308178	0.0586959	0.0566627	0.371005
C15orf65	10.3751	2.18811	3.2178e-25	2.72191e-24	0.0390805	ARPs	0.183751	0.0433128	0.0868807	0.0902981	0.0720573	0.0573484
HES6	9.23537	2.18809	2.57401e-20	3.01868e-19	0.0428745	AR2	0.184762	0.0890827	0.0940132	0.144802	0.0586159	0.0435687
TCP1	26.2502	2.18751	7.10719e-152	3.41007e-150	0.129246	ARPs	0.553638	0.150451	0.14454	0.315209	0.108789	0.177295
CST3	33.7941	2.18727	2.40431e-250	2.2542e-247	0.71927	WMAs	2.48239	1.33792	1.78132	0.9927	1.22631	1.56502
HDDC2	39.0634	2.18634	0	0	0.308644	SVZCs	1.11678	0.240082	0.59721	0.372596	0.312555	0.651847
RPS19BP1	6.96836	2.18583	3.20654e-12	3.72271e-11	0.0483743	WMAs	0.18544	0.0881765	0.0945802	0.0892533	0.0438072	0.120813
PRDX1	49.0512	2.18583	0	0	0.777131	A0	1.23956	0.352743	0.431379	0.436366	0.327173	0.420831
DCUN1D1	39.9118	2.18565	0	0	0.308557	ARPs	1.15668	0.3914	0.861519	0.486313	0.700602	0.613006
AC093879.1	33.8043	2.18525	1.70673e-250	1.77797e-248	0.225287	ARPs	0.960481	0.303541	0.597131	0.695443	0.39782	0.739431
RAN	12.2747	2.18497	1.2378e-34	3.84073e-33	0.0943695	WMAs	0.361448	0.112985	0.12953	0.151675	0.0914423	0.170296
MIB1	51.2456	2.18433	0	0	0.571255	AR2	1.80838	0.789885	0.962996	1.06971	1.00662	0.752452
LHX2	34.4953	2.18429	9.42179e-261	1.04422e-258	0.213793	ARPs	0.89128	0.274934	0.593875	0.275323	0.117063	0.380651
GMNN	24.262	2.18423	4.94418e-130	1.89518e-128	0.121839	ARPs	0.538242	0.145726	0.35527	0.225492	0.508331	0.170671
SEZ6L	9.03361	2.1842	1.66096e-19	1.98959e-18	0.129764	A0	0.158993	0.128761	0.0372174	0.10084	0.0616044	0.0288903
TCEAL8	13.675	2.18294	1.43256e-42	2.24156e-41	0.0551948	SVZCs	0.239093	0.0512053	0.0845479	0.0577806	0.0520386	0.0769273
HSPA4	46.3116	2.18248	0	0	0.700902	A0	0.969252	0.325996	0.307778	0.609267	0.309987	0.359578
NDUFC2	24.4426	2.18196	6.03806e-132	2.37214e-130	0.133844	ARPs	0.571865	0.157034	0.194428	0.16825	0.147921	0.203369
LHX2	36.2686	2.18196	5.05534e-288	5.9047e-286	0.220779	SVZCs	0.89128	0.274934	0.593875	0.275323	0.117063	0.380651
HTRA1	41.2348	2.18092	0	0	0.338186	ARPs	1.31047	0.468245	1.1047	0.272277	0.727667	0.777692
GJA1	52.0568	2.18026	0	0	0.721315	AR2	2.36596	1.19497	1.8019	1.74995	1.92512	1.14105
SMIM26	21.4405	2.17971	5.59587e-102	2.55087e-100	0.122046	AR2	0.490164	0.0725329	0.116785	0.0759657	0.0672094	0.130698
IARS	47.4704	2.17894	0	0	0.750946	A0	1.22957	0.477997	0.428123	0.544628	0.384715	0.63906
LINC01351	7.01443	2.17874	2.30882e-12	1.53229e-11	0.0280032	SVZCs	0.112064	0.0143962	0.0698488	0.0258544	0.0264111	0.0384843
AL445259.1	35.4162	2.17872	9.60738e-275	1.85156e-272	0.297686	AR2	1.11848	0.149531	0.726084	0.244711	0.455353	0.375035
SUGT1	30.4279	2.17861	2.34702e-203	1.08558e-200	0.406027	WMAs	1.29963	0.422888	0.505832	0.701273	0.463305	0.452465
DNAJB6	59.707	2.17804	0	0	0.874309	A0	1.48119	0.560546	0.560138	0.992648	0.597525	0.521157
TRMT112	14.5612	2.17755	4.95545e-48	1.11844e-46	0.0694275	AR2	0.296375	0.0526001	0.0632798	0.0739495	0.0367841	0.0734892
GTF2A2	14.2272	2.17733	6.2079e-46	2.61033e-44	0.115781	WMAs	0.424283	0.102264	0.137804	0.117336	0.110505	0.147621
RPS27L	32.6598	2.17727	5.82519e-234	5.15499e-232	0.218141	SVZCs	0.820009	0.249809	0.306939	0.247567	0.32142	0.308409
DNAJB6	43.3043	2.17667	0	0	0.399745	ARPs	1.48119	0.560546	0.560138	0.992648	0.597525	0.521157
LRP4-AS1	23.3351	2.17539	1.95453e-120	8.07173e-119	0.116883	SVZCs	0.479534	0.0750128	0.396139	0.127708	0.12629	0.302122
RPL27	25.323	2.17486	1.78275e-141	7.83823e-140	0.132567	ARPs	0.594024	0.165231	0.242574	0.174276	0.157793	0.275845
AP000787.1	23.2101	2.17436	3.60237e-119	1.25216e-117	0.113921	ARPs	0.508246	0.136925	0.302493	0.234643	0.169407	0.387017
SPX	15.8586	2.17382	1.2262e-56	3.17915e-55	0.0689403	AR2	0.28903	0.213017	0.150376	0.355975	0.233656	0.0716439
GIHCG	19.0885	2.17378	3.14546e-81	7.02162e-80	0.0904215	ARPs	0.402611	0.10424	0.162687	0.176539	0.117692	0.183985
KCNE4	23.5224	2.17326	2.40907e-122	1.64834e-120	0.368926	A0	0.599977	0.418968	0.167429	0.504049	0.127008	0.196576
IFIT1	7.06903	2.17219	1.56025e-12	9.01183e-12	0.0232439	ARPs	0.118537	0.0275397	0.104376	0.0500712	0.0571822	0.0520389
SLC2A12	19.5376	2.17216	5.25797e-85	1.56431e-83	0.0789367	SVZCs	0.344541	0.0596512	0.347182	0.0873402	0.234958	0.185714
HSPD1	44.1732	2.17208	0	0	0.50134	AR2	1.61138	0.551463	0.425274	1.14166	0.478644	0.636428
EIF1B	15.277	2.17092	1.08862e-52	5.67029e-51	0.123711	WMAs	0.484002	0.143559	0.160298	0.196904	0.129492	0.240799
SLC5A3	56.7798	2.17089	0	0	0.849287	A0	1.44109	0.518244	0.540142	1.10787	0.511769	0.341294
HSPA4	25.5093	2.17049	1.55363e-143	3.76892e-141	0.28866	WMAs	0.969252	0.325996	0.307778	0.609267	0.309987	0.359578
CLDN10	28.9054	2.17034	1.02157e-183	6.53841e-182	0.153206	SVZCs	0.606951	0.212135	0.474596	0.170134	0.262945	0.324964
RBIS	16.9839	2.17028	1.0805e-64	7.0456e-63	0.141158	WMAs	0.522859	0.127979	0.212098	0.205343	0.142016	0.243711
SLC7A11	69.587	2.16991	0	0	0.985452	A0	3.08145	1.6198	1.72634	2.16629	1.77935	1.28181
SNHG8	8.93519	2.16949	4.0646e-19	6.9527e-18	0.0666138	WMAs	0.267258	0.101108	0.12141	0.104704	0.0658857	0.219355
CACNB2	40.9252	2.16873	0	0	0.524138	ARPs	2.19639	1.02158	1.99096	0.817888	1.68961	1.95955
SIX3-AS1	9.03348	2.16871	1.66298e-19	1.44729e-18	0.0359172	SVZCs	0.166863	0.0142302	0.0521473	0.0395938	0.023533	0.0629633
TRMT112	15.0922	2.16821	1.82289e-51	3.36182e-50	0.070414	SVZCs	0.296375	0.0526001	0.0632798	0.0739495	0.0367841	0.0734892
C4orf3	14.4835	2.16806	1.54036e-47	6.79834e-46	0.116574	WMAs	0.433401	0.128769	0.161944	0.12019	0.113963	0.214603
MRPL34	9.8744	2.16754	5.37519e-23	1.08536e-21	0.0713719	WMAs	0.283554	0.0710931	0.149412	0.0955831	0.0704342	0.138914
SRP14	50.5023	2.16732	0	0	0.83183	A0	1.48066	0.433689	0.563038	0.478194	0.422689	0.67016
SH3BGRL3	19.7743	2.16635	4.95581e-87	2.28309e-85	0.290079	A0	0.331691	0.106234	0.0839933	0.106169	0.0620356	0.10111
PRDX1	39.8128	2.16539	0	0	0.342735	SVZCs	1.23956	0.352743	0.431379	0.436366	0.327173	0.420831
AP000919.2	7.02942	2.16505	2.07389e-12	1.19249e-11	0.0283525	ARPs	0.124718	0.0291873	0.0772616	0.0606366	0.0483609	0.0974825
RPL36A	30.0003	2.16464	9.71201e-198	9.99732e-196	0.232643	AR2	0.89766	0.182193	0.332923	0.176274	0.282318	0.280857
NT5E	24.539	2.16358	5.66423e-133	2.26373e-131	0.106769	ARPs	0.484076	0.130135	0.421603	0.0803269	0.237957	0.198936
SF3B6	22.159	2.16272	8.53506e-109	5.12251e-107	0.334594	A0	0.398531	0.075535	0.103776	0.0785499	0.104885	0.110275
RPS27L	31.073	2.16258	5.5789e-212	4.47991e-210	0.201533	ARPs	0.820009	0.249809	0.306939	0.247567	0.32142	0.308409
MRPS36	24.1392	2.16246	9.68946e-129	4.26558e-127	0.122362	SVZCs	0.50845	0.144902	0.217272	0.13805	0.186236	0.208191
SEM1	43.9144	2.16183	0	0	0.470498	ARPs	1.83426	0.777298	1.03501	0.967617	0.919188	0.740078
RUBCNL	16.2506	2.16162	2.21126e-59	3.70216e-58	0.0592593	ARPs	0.291896	0.0730275	0.246612	0.0266757	0.193382	0.254496
MRPL47	11.3521	2.16157	7.24087e-30	1.90148e-28	0.0832672	WMAs	0.30292	0.0581864	0.115419	0.0962998	0.0761089	0.114283
AC022395.1	9.97992	2.16143	1.8662e-23	1.5038e-22	0.0418902	ARPs	0.18409	0.0441907	0.147178	0.0749126	0.0628492	0.225479
ATP5MG	34.6188	2.16114	1.3191e-262	1.48089e-260	0.236015	ARPs	0.941444	0.299814	0.418357	0.245704	0.346776	0.382341
MT-ND3	41.6024	2.1611	0	0	0.475649	SVZCs	1.89313	1.62488	1.4849	0.815829	1.2759	0.767701
KRT10	13.4558	2.16099	2.84637e-41	3.44164e-40	0.0628352	ARPs	0.27528	0.0684615	0.103019	0.0901924	0.0735143	0.0980539
METTL5	24.2746	2.16085	3.63913e-130	1.62264e-128	0.122565	SVZCs	0.485867	0.110473	0.176323	0.130937	0.154033	0.174769
ISCU	20.1734	2.16026	1.67575e-90	4.24319e-89	0.0942529	ARPs	0.419479	0.110283	0.159267	0.123314	0.11878	0.171888
MAF	18.347	2.15886	3.48781e-75	1.16675e-73	0.0898904	AR2	0.338072	0.236875	0.18926	0.382319	0.230104	0.0862468
PCBD1	15.6103	2.15829	6.19199e-55	9.62366e-54	0.0689655	ARPs	0.297741	0.0748235	0.0959087	0.112882	0.0633466	0.0884573
S100A13	20.1094	2.15686	6.10477e-90	6.0507e-88	0.205393	WMAs	0.761442	0.193713	0.393106	0.15951	0.227887	0.358551
ELOC	20.2283	2.15668	5.51554e-91	1.4079e-89	0.09553	ARPs	0.417928	0.110069	0.176456	0.13004	0.12989	0.213621
NDUFB2	28.2118	2.15651	4.18842e-175	2.41758e-173	0.171903	ARPs	0.728521	0.215476	0.289779	0.220284	0.164963	0.327613
EPHB1	41.0374	2.15621	0	0	0.391234	SVZCs	1.49022	0.693041	1.5514	0.571719	0.498885	1.17329
RPL36A	20.9779	2.15605	1.04336e-97	1.1638e-95	0.235527	WMAs	0.89766	0.182193	0.332923	0.176274	0.282318	0.280857
COX7B	41.3346	2.15598	0	0	0.661624	A0	0.988916	0.164694	0.321232	0.163437	0.231695	0.362858
AP001439.1	7.45296	2.15534	9.12719e-14	8.64144e-13	0.105324	A0	0.112878	0.0274555	0.0264709	0.078504	0.0478996	0.0426846
TPD52L1	53.5717	2.1553	0	0	0.775734	ARPs	3.1471	1.79159	2.35002	1.80738	1.80966	2.09338
NACA	37.5058	2.15428	0	1.6791e-305	0.34665	AR2	1.20428	0.311968	0.484588	0.353595	0.380289	0.421601
MRPL34	14.2169	2.15363	7.19439e-46	9.49309e-45	0.0643678	ARPs	0.283554	0.0710931	0.149412	0.0955831	0.0704342	0.138914
DANCR	13.9458	2.15166	3.33679e-44	1.3305e-42	0.114195	WMAs	0.414969	0.116916	0.196114	0.150937	0.109527	0.208041
MORN2	21.6604	2.15152	4.84651e-104	2.76522e-102	0.326738	A0	0.377077	0.0594068	0.0981134	0.0999859	0.071347	0.104981
SELENOK	15.5903	2.15148	8.47974e-55	4.56065e-53	0.123711	WMAs	0.502043	0.128208	0.174823	0.153508	0.136953	0.177343
PNMT	12.1972	2.15129	3.21718e-34	3.37478e-33	0.0467433	ARPs	0.222505	0.0545811	0.12929	0.0803097	0.163947	0.0887148
ABHD3	39.8765	2.15127	0	0	0.368819	AR2	1.29654	0.428138	0.570567	0.523187	0.592918	0.468781
KIAA0319	38.5703	2.15011	0	0	0.32567	ARPs	1.31605	0.479185	1.18955	0.676414	0.91298	0.855436
MRPL21	12.9811	2.14965	1.56603e-38	1.79411e-37	0.0518519	ARPs	0.234918	0.0579654	0.0904047	0.065919	0.0767139	0.105138
HSBP1	16.7824	2.14963	3.28455e-63	2.05299e-61	0.145123	WMAs	0.53071	0.158299	0.177024	0.195459	0.146513	0.18244
RPL24	22.6446	2.14836	1.57854e-113	2.3302e-111	0.248216	WMAs	0.910084	0.299128	0.415804	0.323215	0.288829	0.480288
CRYZ	29.6604	2.14832	2.49118e-193	3.07541e-191	0.4405	A0	0.468111	0.0935527	0.126335	0.189682	0.112415	0.0879618
POMP	32.416	2.14771	1.63204e-230	2.26461e-228	0.271376	AR2	0.925245	0.186338	0.283539	0.201682	0.222168	0.295337
SOX21	9.42131	2.14683	4.45496e-21	3.36988e-20	0.0367816	ARPs	0.158166	0.0379648	0.106381	0.0592277	0.049658	0.0529086
SF3B6	12.7002	2.14657	5.89823e-37	1.95238e-35	0.0975416	WMAs	0.398531	0.075535	0.103776	0.0785499	0.104885	0.110275
COX20	35.5687	2.14461	4.26884e-277	4.79243e-275	0.267248	SVZCs	0.952614	0.285559	0.522638	0.307594	0.384533	0.426167
MRPS33	10.5447	2.14385	5.37624e-26	1.23675e-24	0.0824742	WMAs	0.308936	0.0721417	0.115655	0.0815059	0.0787246	0.11441
ZNF208	11.5743	2.14288	5.56425e-31	5.41745e-30	0.0546616	ARPs	0.286428	0.0724114	0.193336	0.0738161	0.151198	0.206623
AL627171.2	31.5535	2.14277	1.60337e-218	1.27864e-216	0.219562	SVZCs	0.871689	0.249366	0.286819	0.273815	0.217498	0.23544
ADGRV1	56.5268	2.1426	0	0	0.868199	ARPs	4.2535	2.81577	4.18414	2.87645	1.76282	4.02428
NHSL1	55.8618	2.13945	0	0	0.731331	SVZCs	2.61745	1.38419	2.57344	1.35651	2.22501	1.94654
AC105114.2	6.88286	2.13851	5.86612e-12	3.32292e-11	0.0283525	ARPs	0.126706	0.0302182	0.0771518	0.0795978	0.0482295	0.0888703
ATP5ME	50.1666	2.13833	0	0	0.810882	A0	1.40814	0.371686	0.531505	0.301391	0.35786	0.476742
RPL30	43.0952	2.13778	0	0	0.710503	A0	1.20625	0.305242	0.426525	0.324328	0.309638	0.385334
PSAT1	26.2424	2.137	8.7295e-152	2.34749e-149	0.349722	WMAs	1.20018	0.665325	0.738512	0.641015	0.42371	0.764177
IFI27L2	11.4712	2.13641	1.84104e-30	4.95083e-29	0.0919905	WMAs	0.347152	0.169183	0.16594	0.193294	0.0902037	0.15436
NLGN4X	35.3623	2.13611	6.48184e-274	7.86206e-272	0.272286	ARPs	1.19958	0.42363	1.10903	0.212377	0.593615	1.25547
PFDN5	28.5288	2.13559	5.14212e-179	3.16839e-177	0.171266	SVZCs	0.697434	0.228272	0.358128	0.206631	0.249688	0.402541
PRR34-AS1	8.97099	2.13443	2.93862e-19	2.53457e-18	0.0351055	SVZCs	0.148369	0.032873	0.0400781	0.03578	0.0471987	0.0296612
CEBPG	11.7654	2.13398	5.88262e-32	1.66586e-30	0.0880254	WMAs	0.33141	0.122877	0.0884743	0.186315	0.0857376	0.147759
NDUFA4	44.4283	2.13379	0	0	0.735816	A0	1.23482	0.257669	0.441775	0.264835	0.281848	0.529863
AC006355.2	11.7592	2.13293	6.32947e-32	6.29499e-31	0.0541507	ARPs	0.220158	0.0546293	0.159142	0.121766	0.111077	0.175616
MAP2K6	8.7496	2.13247	2.14104e-18	2.34817e-17	0.0380024	AR2	0.160743	0.149095	0.190234	0.329633	0.312702	0.0390005
NDUFS6	21.669	2.13175	4.02493e-104	1.43205e-102	0.112419	SVZCs	0.450174	0.132989	0.173434	0.121988	0.152466	0.227061
COA6	15.9448	2.13122	3.0973e-57	8.09075e-56	0.0806334	AR2	0.327832	0.0477317	0.0813453	0.0583231	0.0588219	0.0848525
A2ML1-AS1	18.7746	2.13064	1.21892e-78	2.63618e-77	0.0927203	ARPs	0.39242	0.104125	0.298799	0.230148	0.176417	0.377678
RHOJ	38.6717	2.13062	0	0	0.317241	ARPs	1.30153	0.476756	1.22581	0.390457	0.564197	1.0074
SLC10A1	11.2324	2.13014	2.82708e-29	4.54456e-28	0.16206	A0	0.165743	0.0097359	0.0403548	0.0364247	0.0192148	0.0363557
AL160254.1	21.3055	2.12999	1.00848e-100	2.87226e-99	0.102427	ARPs	0.434012	0.11703	0.414789	0.180832	0.241384	0.576966
SNTA1	45.0171	2.12898	0	0	0.438002	AR2	1.40037	0.760175	1.04353	0.797389	0.959707	0.529931
TPD52L1	57.3619	2.12801	0	0	0.803774	SVZCs	3.1471	1.79159	2.35002	1.80738	1.80966	2.09338
SS18L2	12.7645	2.12755	2.58759e-37	2.88258e-36	0.051341	ARPs	0.232294	0.0581188	0.0851509	0.136642	0.0792327	0.064756
SLC38A2	29.2327	2.12755	7.44023e-188	7.16949e-186	0.230694	AR2	0.801419	0.491775	0.309707	0.770301	0.319453	0.247784
NR2E1	20.9048	2.12706	4.83937e-97	1.32396e-95	0.0945083	ARPs	0.395008	0.105162	0.296155	0.113061	0.123422	0.302935
CADM1	59.4189	2.12677	0	0	0.854662	ARPs	3.37219	2.00738	3.19533	2.08465	2.4393	3.27196
NOP10	14.3449	2.12614	1.14605e-46	2.50355e-45	0.0750305	AR2	0.30952	0.0358738	0.0634079	0.0441103	0.0364418	0.0798274
FREM2	17.3077	2.12601	4.11391e-67	9.76807e-66	0.0777192	SVZCs	0.370786	0.13852	0.435515	0.097882	0.0981285	0.253051
IDI2-AS1	11.7198	2.12483	1.00921e-31	1.24368e-30	0.0474838	SVZCs	0.196879	0.0767165	0.121143	0.0486854	0.113536	0.0532906
TPD52L1	37.4475	2.12408	6.59176e-307	1.27038e-303	0.762094	WMAs	3.1471	1.79159	2.35002	1.80738	1.80966	2.09338
THSD1	12.1709	2.12332	4.43941e-34	4.64705e-33	0.0475096	ARPs	0.218409	0.0545112	0.314741	0.045444	0.0521011	0.193448
AC016723.1	9.13809	2.12304	6.35656e-20	5.61377e-19	0.0344968	SVZCs	0.148757	0.0316822	0.142763	0.0361581	0.0354594	0.204665
AHSA1	27.0887	2.12301	1.33885e-161	6.94238e-160	0.139719	ARPs	0.572567	0.163319	0.156479	0.265286	0.155223	0.193051
MORN2	18.3703	2.12288	2.27031e-75	5.95291e-74	0.0939529	SVZCs	0.377077	0.0594068	0.0981134	0.0999859	0.071347	0.104981
FREM2	11.7777	2.1222	5.08474e-32	1.44227e-30	0.0761301	WMAs	0.370786	0.13852	0.435515	0.097882	0.0981285	0.253051
SUMO2	28.4377	2.12175	6.92549e-178	4.0858e-176	0.169349	ARPs	0.686571	0.204373	0.261719	0.215684	0.193732	0.269754
NDUFB2	29.0995	2.12107	3.64734e-186	2.38279e-184	0.187703	SVZCs	0.728521	0.215476	0.289779	0.220284	0.164963	0.327613
FSBP	9.55189	2.11968	1.27352e-21	1.186e-20	0.036526	SVZCs	0.152102	0.0207729	0.082185	0.0371034	0.0544702	0.0478303
AC093110.1	7.84566	2.11855	4.30691e-15	2.74292e-14	0.0326948	ARPs	0.143063	0.0348046	0.106818	0.0658246	0.0474705	0.17595
MRPL18	15.8849	2.11812	8.06191e-57	1.29058e-55	0.0715198	ARPs	0.300711	0.0777109	0.0919765	0.122481	0.0732661	0.108862
CCT3	32.9245	2.1179	9.79154e-238	9.15549e-236	0.207152	ARPs	0.810029	0.25271	0.281668	0.345935	0.265512	0.318994
EPHX1	41.7913	2.11707	0	0	0.392448	AR2	1.23875	0.43016	0.722863	0.411391	0.687767	0.447923
LINC02324	6.87989	2.11675	5.99007e-12	5.07685e-11	0.0282582	AR2	0.111494	0.0453486	0.0495757	0.0419563	0.0390801	0.0268315
COX17	30.6402	2.11594	3.57089e-206	4.82e-204	0.473087	A0	0.582165	0.107094	0.167401	0.129421	0.128102	0.158827
ZNF208	11.9152	2.11413	9.85786e-33	1.24579e-31	0.0592532	SVZCs	0.286428	0.0724114	0.193336	0.0738161	0.151198	0.206623
CALM1	45.179	2.11361	0	0	0.549936	ARPs	1.96385	0.881987	1.13544	1.13667	0.812586	1.12221
TUBB2A	23.5101	2.11348	3.2141e-122	1.15781e-120	0.12567	ARPs	0.566225	0.162117	0.260932	0.103132	0.182562	0.428766
ATP5IF1	19.4859	2.1131	1.4458e-84	3.3661e-83	0.0942529	ARPs	0.41676	0.112894	0.162456	0.130772	0.118762	0.176015
EPHA6	42.7321	2.1107	0	0	0.560409	ARPs	2.28217	1.11088	2.28797	1.30888	0.992409	1.89469
AC107081.2	7.20902	2.10988	5.63545e-13	5.17042e-12	0.10387	A0	0.100985	0.015495	0.0243186	0.0552291	0.0239362	0.0381901
AL109809.5	45.1218	2.1095	0	0	0.550192	ARPs	2.04485	0.939639	1.86086	1.04074	1.40263	1.38538
RNF43	10.2541	2.10867	1.13453e-24	1.16303e-23	0.0349026	SVZCs	0.164664	0.031463	0.292617	0.040664	0.0285426	0.187635
MRPS6	55.0768	2.10865	0	0	0.842013	A0	1.402	0.399753	0.536652	0.877919	0.42939	0.371037
SMIM30	11.6712	2.10627	1.78961e-31	1.75819e-30	0.0469987	ARPs	0.207984	0.0523018	0.0769253	0.0604405	0.0487073	0.0535617
LSM3	24.5852	2.10624	1.81872e-133	1.40203e-131	0.373873	A0	0.443774	0.0689628	0.121979	0.0744379	0.104179	0.101305
CPE	57.8996	2.10578	0	0	0.860536	ARPs	3.33066	1.98276	2.82622	2.28968	2.52829	2.36224
CSPG5	15.6081	2.10516	6.41624e-55	1.27261e-53	0.0655438	SVZCs	0.26965	0.097957	0.352642	0.0694672	0.119863	0.20217
ABHD2	41.3064	2.10397	0	0	0.342735	SVZCs	1.22045	0.573592	1.05807	0.441897	0.947531	1.12587
GPC5	57.7884	2.10347	0	0	0.903959	ARPs	4.20267	2.7928	4.36219	2.3757	3.94296	4.3087
ZNF680	43.5989	2.10329	0	0	0.428608	ARPs	1.50974	0.599106	1.16041	0.847655	0.937027	0.912143
LRP4	42.87	2.10289	0	0	0.42682	ARPs	1.59013	0.646529	1.25608	0.652431	0.956886	0.778313
AC017101.1	15.7707	2.10235	4.94796e-56	7.80913e-55	0.0730524	ARPs	0.323313	0.0851583	0.202217	0.113398	0.14424	0.347107
ROBO1	42.0046	2.09975	0	0	0.381899	SVZCs	1.46347	0.536421	1.36573	0.573672	0.684837	1.40106
PCDH19	8.33683	2.09942	7.63105e-17	7.94958e-16	0.0465286	AR2	0.17976	0.0642819	0.0989416	0.106588	0.164783	0.0449293
CPED1	16.7042	2.09934	1.22162e-62	7.58103e-61	0.174465	WMAs	0.691496	0.04854	0.399396	0.0381428	0.209122	0.136772
RPLP1	23.6682	2.09915	7.66079e-124	1.35588e-121	0.340206	WMAs	1.17451	0.553348	0.609482	0.572247	0.420024	0.636989
MRPL33	29.2739	2.09807	2.23104e-188	1.43059e-186	0.174713	ARPs	0.739697	0.227796	0.373309	0.26356	0.294533	0.396429
NCR3LG1	7.83449	2.09778	4.70748e-15	2.99253e-14	0.0324393	ARPs	0.132627	0.0325956	0.0988477	0.0276341	0.0830747	0.0856551
TBPL1	17.2512	2.09717	1.09668e-66	2.04537e-65	0.0750958	ARPs	0.324252	0.0857301	0.204106	0.133512	0.159333	0.172396
SPRY4	7.70378	2.09695	1.32101e-14	8.25395e-14	0.0283525	ARPs	0.124914	0.0306271	0.0760223	0.00711212	0.0399977	0.144613
CPEB3	43.689	2.09653	0	0	0.493231	ARPs	1.8513	0.813224	1.50936	0.74726	1.21978	0.903928
TOMM6	21.6773	2.09348	3.35764e-104	9.87927e-103	0.111877	ARPs	0.45533	0.126745	0.187706	0.14516	0.134437	0.197004
TUBE1	31.1072	2.09331	1.92403e-212	1.5522e-210	0.207663	ARPs	0.775142	0.242468	0.395489	0.353332	0.346956	0.455467
COX16	23.3592	2.0931	1.11207e-120	3.95263e-119	0.129502	ARPs	0.520189	0.148356	0.24703	0.175026	0.167871	0.233973
RORB-AS1	11.2545	2.09257	2.20018e-29	2.06003e-28	0.0431673	ARPs	0.191261	0.0482364	0.15152	0.0557123	0.0810276	0.0819431
EMX2OS	29.1808	2.09225	3.40306e-187	1.31169e-184	0.411578	WMAs	1.42993	0.696282	1.0862	0.667332	0.556971	1.1818
MRPS33	15.8495	2.09172	1.41657e-56	2.89234e-55	0.0758929	SVZCs	0.308936	0.0721417	0.115655	0.0815059	0.0787246	0.11441
AC091885.2	16.2037	2.09154	4.7466e-59	1.00341e-57	0.0838068	SVZCs	0.336432	0.0255078	0.195866	0.0896933	0.100077	0.146224
RPL27	25.7441	2.09126	3.75328e-146	1.88698e-144	0.153206	SVZCs	0.594024	0.165231	0.242574	0.174276	0.157793	0.275845
BCO2	35.7199	2.09096	1.939e-279	4.02779e-277	0.555135	A0	0.705006	0.166906	0.215374	0.499027	0.185616	0.138909
SNRPE	23.2691	2.09074	9.11026e-120	6.05431e-118	0.353215	A0	0.403659	0.0639909	0.110418	0.0623449	0.0810236	0.130568
TMEM126B	23.3206	2.09073	2.74017e-120	1.13028e-118	0.121347	SVZCs	0.479727	0.112365	0.22249	0.134992	0.14033	0.183724
C1orf61	50.3205	2.09056	0	0	0.6528	SVZCs	2.17634	1.45821	2.21593	1.04192	1.98491	1.92233
DNAJA4	15.037	2.09028	4.20006e-51	2.04635e-49	0.137193	WMAs	0.483547	0.148072	0.109261	0.184981	0.136299	0.148511
RPL24	31.5228	2.09002	4.23349e-218	3.54734e-216	0.225543	ARPs	0.910084	0.299128	0.415804	0.323215	0.288829	0.480288
RPL12	20.2881	2.08913	1.6376e-91	1.67577e-89	0.223632	WMAs	0.845357	0.227562	0.348793	0.21509	0.271781	0.300926
MRPL32	8.04385	2.08891	8.70622e-16	6.69665e-15	0.033888	SVZCs	0.136641	0.04713	0.0843101	0.0338375	0.0444377	0.111854
SEC61G	26.4472	2.08877	3.92469e-154	2.92162e-152	0.180024	AR2	0.644266	0.123877	0.174303	0.130401	0.1224	0.192809
EIF1	26.3546	2.0883	4.54715e-153	1.24205e-150	0.369548	WMAs	1.20355	0.57875	0.549622	0.62647	0.437202	0.77806
GFRA1	28.1203	2.08823	5.53435e-174	3.18386e-172	0.177778	ARPs	0.775475	0.243361	0.76752	0.318811	0.274666	1.13964
RANBP3L	53.1388	2.08819	0	0	0.751766	AR2	2.60467	1.23395	2.14298	1.56781	1.7015	1.3727
BAG3	55.9022	2.08775	0	0	0.884783	A0	1.70095	0.896229	0.719645	0.846215	0.751918	1.06853
MRPS36	22.7025	2.08752	4.23433e-114	1.38968e-112	0.121328	ARPs	0.50845	0.144902	0.217272	0.13805	0.186236	0.208191
C4orf3	21.4053	2.08673	1.19367e-101	4.17846e-100	0.112013	SVZCs	0.433401	0.128769	0.161944	0.12019	0.113963	0.214603
CEBPG	20.4129	2.08665	1.2853e-92	6.38782e-91	0.307536	A0	0.33141	0.122877	0.0884743	0.186315	0.0857376	0.147759
NHSL1	48.3732	2.08592	0	0	0.680715	ARPs	2.61745	1.38419	2.57344	1.35651	2.22501	1.94654
GTF2A2	21.0888	2.08577	1.00828e-98	3.4258e-97	0.106737	SVZCs	0.424283	0.102264	0.137804	0.117336	0.110505	0.147621
HSPA4	34.5924	2.08568	3.28485e-262	3.67586e-260	0.254662	ARPs	0.969252	0.325996	0.307778	0.609267	0.309987	0.359578
MKLN1-AS	22.3502	2.08565	1.203e-110	3.8216e-109	0.109323	ARPs	0.455189	0.127346	0.233094	0.182079	0.237157	0.297915
LRP4	46.2761	2.08506	0	0	0.465097	SVZCs	1.59013	0.646529	1.25608	0.652431	0.956886	0.778313
C1orf54	25.0391	2.08416	2.29659e-138	9.72757e-137	0.13129	ARPs	0.53461	0.154165	0.35481	0.182305	0.292982	0.338148
MIB1	45.2579	2.08385	0	0	0.507535	ARPs	1.80838	0.789885	0.962996	1.06971	1.00662	0.752452
PLCG2	57.8804	2.08259	0	0	0.994763	A0	3.57539	1.50418	2.21859	1.96855	1.97373	1.63696
PLOD1	17.4322	2.08182	4.70308e-68	1.4324e-66	0.0864799	AR2	0.314742	0.173943	0.104907	0.167311	0.138955	0.083769
ZNF703	11.1184	2.08145	1.021e-28	1.17048e-27	0.0424107	SVZCs	0.17506	0.0499862	0.147467	0.0442122	0.0673601	0.0991441
RPL21	32.9594	2.0811	3.10147e-238	2.92364e-236	0.258238	ARPs	1.01462	0.347518	0.541183	0.396174	0.386674	0.592265
C2orf74	20.6547	2.08108	8.86421e-95	2.89275e-93	0.101055	SVZCs	0.40662	0.123833	0.172663	0.112058	0.147703	0.126674
AL390755.1	22.6151	2.08066	3.08052e-113	1.90148e-111	0.344196	A0	0.45283	0.874894	0.126988	0.684844	0.557509	0.360791
SUOX	10.0303	2.08051	1.12222e-23	9.10004e-23	0.0395913	ARPs	0.166589	0.0419644	0.1015	0.0637063	0.0700688	0.104532
NDUFB6	24.7406	2.08044	3.91824e-135	1.60099e-133	0.136143	ARPs	0.54897	0.159522	0.224752	0.182114	0.185847	0.236106
ANKRD33B	8.82927	2.0802	1.05365e-18	7.45029e-18	0.0309068	ARPs	0.160479	0.0403401	0.130767	0.0331499	0.0608619	0.0926262
TIMM21	15.1668	2.07894	5.87054e-52	8.72159e-51	0.0659004	ARPs	0.273031	0.0716749	0.116058	0.0896283	0.0896512	0.114936
UBB	33.5432	2.07807	1.1297e-246	1.74952e-244	0.265043	AR2	0.933104	0.312449	0.281281	0.539169	0.207558	0.311363
LGI1	48.6084	2.078	0	0	0.603167	AR2	1.98855	1.18246	1.52673	0.964788	1.2731	0.913595
RPL31	29.4218	2.07795	2.88922e-190	1.90546e-188	0.205364	ARPs	0.806238	0.257405	0.408368	0.26002	0.370066	0.338087
SMIM27	7.01423	2.0777	2.31226e-12	1.3278e-11	0.0298851	ARPs	0.124655	0.0309649	0.0755576	0.0525189	0.0377591	0.0775323
WDR17	40.8208	2.0775	0	0	0.401022	ARPs	1.45464	0.575379	1.22514	0.777792	0.829592	0.867933
SLC7A11	36.4878	2.07739	1.73453e-291	2.50712e-288	0.854877	WMAs	3.08145	1.6198	1.72634	2.16629	1.77935	1.28181
RPL27A	19.5064	2.07521	9.68785e-85	8.77471e-83	0.218081	WMAs	0.742338	0.267939	0.335744	0.243323	0.232088	0.394059
EYA2	49.8586	2.07518	0	0	0.625335	AR2	2.01061	1.33351	1.43661	1.27101	1.61915	0.930143
DPY30	20.4797	2.0751	3.2691e-93	8.56534e-92	0.105236	ARPs	0.42519	0.11845	0.195307	0.160057	0.164798	0.188512
MIR124-2HG	9.01172	2.07501	2.02841e-19	1.7587e-18	0.0290179	SVZCs	0.137899	0.0369593	0.142317	0.0344902	0.0392169	0.0814151
C6orf118	9.40419	2.07427	5.2435e-21	6.60004e-20	0.138784	A0	0.137779	0.0689667	0.0344763	0.437709	0.0356185	0.0160024
NDUFC2	24.7822	2.07412	1.39443e-135	6.48431e-134	0.151786	SVZCs	0.571865	0.157034	0.194428	0.16825	0.147921	0.203369
RAB23	12.3725	2.07243	3.68211e-35	6.42517e-34	0.0599269	AR2	0.219398	0.159583	0.0972605	0.264552	0.117438	0.0566908
UBB	33.2373	2.07222	3.11479e-242	3.05232e-240	0.236782	ARPs	0.933104	0.312449	0.281281	0.539169	0.207558	0.311363
NDUFB1	19.2884	2.07207	6.7187e-83	5.93058e-81	0.214116	WMAs	0.721192	0.163715	0.238933	0.175373	0.22422	0.22952
SMIM30	11.3576	2.07101	6.7988e-30	1.04962e-28	0.0545676	AR2	0.207984	0.0523018	0.0769253	0.0604405	0.0487073	0.0535617
SF3B6	17.6605	2.07032	8.44803e-70	2.6402e-68	0.104263	AR2	0.398531	0.075535	0.103776	0.0785499	0.104885	0.110275
TAFA1	13.0856	2.06893	3.98244e-39	5.82669e-38	0.0596591	SVZCs	0.332488	0.171048	0.477472	0.0898477	0.197831	0.304814
RPL39	36.1207	2.06814	1.07508e-285	2.31643e-283	0.583939	A0	0.8505	0.195264	0.277435	0.188565	0.182041	0.212747
C9orf153	13.9794	2.06801	2.08289e-44	4.37911e-43	0.0674787	AR2	0.261307	0.161431	0.124104	0.149176	0.169195	0.0687973
CDH10	38.1995	2.06746	0	0	0.365869	SVZCs	1.38702	0.39185	1.05667	0.540247	0.97873	0.48433
HMGB1	54.7585	2.06743	0	0	0.821967	ARPs	2.97792	1.6954	1.83896	1.99162	1.93202	1.59476
GJA1	44.8675	2.06737	0	0	0.629374	ARPs	2.36596	1.19497	1.8019	1.74995	1.92512	1.14105
TSC22D3	18.9173	2.06716	8.22156e-80	2.26534e-78	0.0846185	SVZCs	0.366952	0.105662	0.132719	0.100561	0.385854	0.0605507
PLOD3	28.5365	2.06663	4.13298e-179	4.67013e-177	0.436718	A0	0.479918	0.20705	0.13718	0.234396	0.144704	0.140166
PFDN4	13.1622	2.06662	1.4474e-39	1.69115e-38	0.054917	ARPs	0.238215	0.0622335	0.103489	0.0681577	0.0892814	0.0918396
AL627171.2	36.905	2.06601	3.83792e-298	9.1819e-296	0.597032	A0	0.871689	0.249366	0.286819	0.273815	0.217498	0.23544
ASF1A	18.0392	2.06556	9.58513e-73	2.43953e-71	0.0852273	SVZCs	0.325785	0.0719599	0.177479	0.0880129	0.121648	0.117909
CLDN12	32.9318	2.06544	7.71689e-238	7.2351e-236	0.228097	ARPs	0.862392	0.282943	0.432679	0.349471	0.421932	0.393599
MAP2	43.6891	2.06519	0	0	0.568582	ARPs	2.02404	0.943771	1.42578	1.43566	1.18438	1.24618
ETNPPL	48.0057	2.06408	0	0	0.611607	SVZCs	2.14628	0.925331	2.14818	1.03184	1.90503	1.30826
PLA2G5	16.3805	2.06236	2.63432e-60	4.47086e-59	0.0607918	ARPs	0.276498	0.07349	0.178703	0.0389554	0.195647	0.14372
RPL31	30.7312	2.0614	2.18141e-207	1.62389e-205	0.211039	SVZCs	0.806238	0.257405	0.408368	0.26002	0.370066	0.338087
AC092969.1	10.4677	2.06094	1.21601e-25	1.28295e-24	0.0420049	SVZCs	0.190033	0.0423925	0.186212	0.0489408	0.0526515	0.172024
DCHS2	20.4777	2.06043	3.40659e-93	3.54879e-91	0.261697	WMAs	1.01152	0.373975	0.788655	0.586121	0.350305	0.542428
BTF3	19.8034	2.06042	2.78183e-87	6.71549e-86	0.106003	ARPs	0.431386	0.121613	0.154813	0.150601	0.105523	0.187012
AP003469.4	9.00738	2.05905	2.11041e-19	2.39327e-18	0.0455542	AR2	0.155671	0.121402	0.073683	0.16324	0.105279	0.039626
AL358154.1	9.66347	2.0587	4.31e-22	3.34109e-21	0.0408685	ARPs	0.164115	0.0419187	0.102365	0.0530617	0.0430526	0.0835588
MRPS21	28.862	2.05862	3.58215e-183	2.28849e-181	0.18608	SVZCs	0.667154	0.182303	0.29879	0.205165	0.226038	0.321555
GNG5	31.2502	2.05851	2.22202e-214	3.26617e-212	0.496363	A0	0.621684	0.112275	0.188096	0.115704	0.120902	0.212297
MT1X	35.4976	2.05808	5.35184e-276	5.96963e-274	0.298093	SVZCs	1.14278	0.748033	0.663973	0.413964	0.915666	1.50781
NRP2	17.7404	2.05798	2.04296e-70	5.04055e-69	0.0842127	SVZCs	0.41648	0.263289	0.461591	0.116953	0.510928	0.716898
CCDC190	8.40404	2.05758	4.31382e-17	4.53474e-16	0.0419001	AR2	0.168369	0.195997	0.165711	0.505223	0.126451	0.043107
SMIM2-AS1	10.6723	2.05721	1.37144e-26	1.94026e-25	0.0538368	AR2	0.211601	0.0499225	0.0841655	0.0710068	0.100693	0.0550782
F11-AS1	27.4247	2.0562	1.39069e-165	7.83168e-164	0.156453	SVZCs	0.702264	0.339682	0.961186	0.219017	0.556843	0.525504
GCNA	12.9099	2.05534	3.95725e-38	7.34101e-37	0.064799	AR2	0.235963	0.125	0.125793	0.181994	0.118521	0.0620618
DNAJB6	31.241	2.05527	2.95755e-214	1.62853e-211	0.489294	WMAs	1.48119	0.560546	0.560138	0.992648	0.597525	0.521157
MEST	16.4573	2.05507	7.43818e-61	1.62079e-59	0.0773133	SVZCs	0.312666	0.0517536	0.140933	0.0846435	0.0429066	0.119507
NDUFC1	40.2226	2.05503	0	0	0.646785	A0	0.875912	0.213205	0.290545	0.223286	0.244696	0.325611
RENBP	18.7237	2.05488	3.17328e-78	1.10857e-76	0.101583	AR2	0.366173	0.172573	0.137304	0.252086	0.123841	0.101134
KRT10	8.9562	2.05457	3.36047e-19	5.77102e-18	0.0785091	WMAs	0.27528	0.0684615	0.103019	0.0901924	0.0735143	0.0980539
EPHB2	12.8324	2.05423	1.07951e-37	1.52725e-36	0.0519481	SVZCs	0.22883	0.107144	0.177003	0.0600697	0.0535065	0.233823
AL590617.2	17.6136	2.05298	1.93858e-69	3.75485e-68	0.0860792	ARPs	0.357024	0.0983965	0.38341	0.079329	0.208697	0.229372
GRAMD1C	41.3213	2.05272	0	0	0.42963	ARPs	1.58075	0.657535	1.37572	0.699691	1.30321	1.04892
DANCR	19.8286	2.05205	1.68573e-87	4.08937e-86	0.100639	ARPs	0.414969	0.116916	0.196114	0.150937	0.109527	0.208041
POLR2K	18.1315	2.0514	1.79763e-73	6.90585e-72	0.276695	A0	0.313368	0.0475934	0.0850635	0.0609352	0.0573274	0.094969
NDUFS5	27.8513	2.05106	1.03933e-170	8.9023e-169	0.225579	AR2	0.770733	0.184778	0.222176	0.181812	0.208709	0.247048
RPL22	20.6209	2.05105	1.78179e-94	1.89602e-92	0.257732	WMAs	0.876816	0.244582	0.354607	0.253898	0.291633	0.324306
RGCC	19.244	2.05098	1.58385e-82	3.59815e-81	0.0968072	ARPs	0.42709	0.120954	0.198632	0.218828	0.192445	0.0850426
UFC1	19.4519	2.05049	2.80699e-84	8.2451e-83	0.108563	SVZCs	0.414064	0.0914994	0.128071	0.116741	0.0897141	0.141217
AL390774.2	9.07947	2.04989	1.09106e-19	7.91985e-19	0.0385696	ARPs	0.169762	0.0437141	0.122651	0.0884843	0.0585211	0.187984
ADGRV1	60.4521	2.04965	0	0	0.916396	SVZCs	4.2535	2.81577	4.18414	2.87645	1.76282	4.02428
CADM2	64.0812	2.04954	0	0	0.955811	ARPs	4.23145	2.85543	4.00762	3.05846	3.99778	3.40054
MORN2	17.2194	2.04889	1.90058e-66	5.65932e-65	0.101096	AR2	0.377077	0.0594068	0.0981134	0.0999859	0.071347	0.104981
ISCU	13.544	2.04693	8.59689e-42	3.23105e-40	0.117367	WMAs	0.419479	0.110283	0.159267	0.123314	0.11878	0.171888
RPS27	24.0757	2.0463	4.49558e-128	8.52196e-126	0.345757	WMAs	1.18572	0.510166	0.697107	0.467211	0.438455	0.727111
SESN2	10.1173	2.04569	4.62837e-24	9.7961e-23	0.0808882	WMAs	0.311715	0.131862	0.0760459	0.102717	0.0848842	0.113709
CDC26	17.977	2.04483	2.95136e-72	9.47987e-71	0.107674	AR2	0.383421	0.0713086	0.126106	0.0883125	0.0858418	0.107283
NOL7	27.243	2.04335	2.01107e-163	1.05384e-161	0.168582	ARPs	0.657086	0.20328	0.265302	0.24669	0.219201	0.348784
TUBB2B	36.0788	2.04275	4.885e-285	6.34685e-283	0.331801	ARPs	1.26728	0.481913	0.819689	0.339314	0.545663	1.18565
PPP1R3D	17.0194	2.04263	5.89918e-65	1.07537e-63	0.0791826	ARPs	0.317164	0.0867191	0.148677	0.0702612	0.117656	0.129301
AF279873.3	19.5226	2.04254	7.05879e-85	2.09648e-83	0.136161	SVZCs	0.715973	0.259946	0.905112	0.226294	0.681673	0.876284
ST6GALNAC6	29.5914	2.04164	1.92927e-192	1.92318e-190	0.209988	AR2	0.694988	0.23389	0.228243	0.320772	0.178982	0.218157
GTF3C6	31.4195	2.0416	1.09458e-216	1.64377e-214	0.497818	A0	0.645307	0.114943	0.199015	0.140175	0.119539	0.218057
RFX2	45.7447	2.0412	0	0	0.530329	AR2	1.63675	1.14327	1.11128	1.47331	1.17603	0.695886
VPS29	28.5328	2.04053	4.59219e-179	2.75135e-177	0.174457	ARPs	0.667424	0.207606	0.345584	0.254972	0.292078	0.371502
FOXP2	15.1954	2.03922	3.79546e-52	7.12471e-51	0.0984172	SVZCs	0.552044	0.0923483	0.360371	0.164887	0.232002	0.250578
ATP5PO	17.534	2.03794	7.87539e-69	5.53031e-67	0.169707	WMAs	0.589998	0.13283	0.235012	0.130316	0.178798	0.225507
SLC3A2	39.3147	2.0375	0	0	0.405109	ARPs	1.39656	0.55435	0.837612	0.769044	0.664502	0.823542
PAPLN	41.4117	2.03732	0	0	0.426564	ARPs	1.54497	0.64102	1.23515	0.798464	1.27175	0.763686
CCT3	22.7766	2.03698	7.82633e-115	1.18042e-112	0.257732	WMAs	0.810029	0.25271	0.281668	0.345935	0.265512	0.318994
ZBTB20-AS5	33.1019	2.03645	2.78784e-240	2.68639e-238	0.237037	ARPs	0.913517	0.31039	0.66064	0.66422	0.434958	0.84882
OAZ1	20.0912	2.03629	8.81448e-90	8.68677e-88	0.214909	WMAs	0.706062	0.257301	0.285184	0.338945	0.223245	0.322668
DLEC1	9.68471	2.03612	3.50186e-22	4.3541e-21	0.047503	AR2	0.177724	0.0717147	0.0910187	0.24936	0.112887	0.0463315
HIGD1A	14.4409	2.03609	2.85964e-47	4.87473e-46	0.0661526	SVZCs	0.260612	0.083421	0.114874	0.0700784	0.0856996	0.119343
ATP5IF1	13.1747	2.03569	1.2267e-39	4.40066e-38	0.114988	WMAs	0.41676	0.112894	0.162456	0.130772	0.118762	0.176015
SUMO2	29.0815	2.03559	6.16105e-186	4.00988e-184	0.18892	SVZCs	0.686571	0.204373	0.261719	0.215684	0.193732	0.269754
FXR1	45.9751	2.03517	0	0	0.530524	ARPs	1.80926	0.809036	0.953819	1.32966	0.962848	1.01998
NSA2	21.5029	2.03502	1.46234e-102	4.23091e-101	0.109579	ARPs	0.460088	0.133263	0.205107	0.177748	0.181517	0.193741
ATP5MPL	19.7291	2.03456	1.21262e-86	1.13385e-84	0.215702	WMAs	0.711388	0.190866	0.304555	0.182295	0.225595	0.340024
POLR2L	7.06111	2.03442	1.65175e-12	1.94665e-11	0.0642347	WMAs	0.209829	0.110843	0.103822	0.0976844	0.0554257	0.129238
NDUFB1	27.2857	2.03439	6.27501e-164	5.03889e-162	0.212667	AR2	0.721192	0.163715	0.238933	0.175373	0.22422	0.22952
SNHG6	24.9519	2.03393	2.03765e-137	8.51638e-136	0.170626	ARPs	0.661906	0.206337	0.362869	0.206918	0.277859	0.373175
PLOD3	22.7936	2.03337	5.30553e-115	2.76765e-113	0.142266	AR2	0.479918	0.20705	0.13718	0.234396	0.144704	0.140166
CCDC81	8.94618	2.03251	3.67989e-19	4.13793e-18	0.0440926	AR2	0.164384	0.124357	0.0717887	0.276177	0.0860388	0.0427447
NDUFAF4	16.6965	2.03245	1.38913e-62	3.11298e-61	0.0838068	SVZCs	0.30895	0.0599296	0.107561	0.0847874	0.0936975	0.132206
MIR193BHG	14.7121	2.03243	5.3887e-49	9.46501e-48	0.0625	SVZCs	0.251844	0.137754	0.265688	0.0676656	0.198124	0.333208
CHL1-AS1	8.3792	2.03218	5.32883e-17	3.60135e-16	0.0339719	ARPs	0.147479	0.0381151	0.0866808	0.0393711	0.051601	0.139716
MRPS18C	22.3766	2.03188	6.64754e-111	2.54529e-109	0.133929	SVZCs	0.482338	0.12104	0.181167	0.141133	0.119902	0.187632
SCG3	27.7112	2.03136	5.11412e-169	2.92754e-167	0.171063	SVZCs	0.649347	0.237642	0.530813	0.201844	0.241142	0.413568
TMEM126B	15.052	2.03083	3.3482e-51	1.64284e-49	0.146709	WMAs	0.479727	0.112365	0.22249	0.134992	0.14033	0.183724
LRRC4C	38.0687	2.03082	0	0	0.481737	ARPs	1.90134	0.87281	2.11831	0.894976	1.81656	1.55279
LRIF1	11.3594	2.03064	6.66382e-30	1.7526e-28	0.112609	WMAs	0.35433	0.123631	0.172799	0.119118	0.0990058	0.229861
RPL23	30.8263	2.02983	1.16479e-208	1.36508e-206	0.253106	AR2	0.882957	0.176264	0.337591	0.196704	0.245134	0.298069
AARS	19.3586	2.02972	1.72542e-83	1.54664e-81	0.193497	WMAs	0.627678	0.341943	0.22816	0.352535	0.193808	0.330269
SNHG6	25.9271	2.02944	3.29509e-148	1.68843e-146	0.183036	SVZCs	0.661906	0.206337	0.362869	0.206918	0.277859	0.373175
HSBP1	23.5527	2.0293	1.17699e-122	4.26199e-121	0.131801	ARPs	0.53071	0.158299	0.177024	0.195459	0.146513	0.18244
TCEAL9	18.7433	2.02858	2.19747e-78	7.72343e-77	0.115225	AR2	0.415606	0.121914	0.102501	0.254077	0.0961767	0.118934
RPL32	34.9813	2.02853	4.32317e-268	7.77051e-266	0.380512	AR2	1.31319	0.358474	0.566545	0.376361	0.381966	0.510543
POLN	9.54875	2.02851	1.31269e-21	1.22116e-20	0.0401786	SVZCs	0.164742	0.0593535	0.186457	0.0429601	0.047279	0.118062
KBTBD12	19.5835	2.02838	2.13757e-85	1.96171e-83	0.180016	WMAs	0.727754	0.280922	0.741219	0.261987	0.23301	0.799194
AC008067.1	9.13498	2.02817	6.5416e-20	4.78146e-19	0.0390805	ARPs	0.179308	0.0470247	0.137866	0.169197	0.056929	0.14948
NID1	20.4788	2.02812	3.32815e-93	1.06902e-91	0.102679	SVZCs	0.407904	0.19441	0.460201	0.116435	0.31412	0.345735
LDHB	39.9473	2.02801	0	0	0.353693	SVZCs	1.16323	0.359583	0.633244	0.431451	0.590796	0.594791
SAP18	24.205	2.02757	1.97185e-129	1.18345e-127	0.174178	AR2	0.610674	0.107771	0.190175	0.0988572	0.11201	0.18767
PELI2	31.174	2.02734	2.40216e-213	2.955e-211	0.258709	AR2	0.932564	0.64391	0.811415	1.02128	0.888207	0.320648
MED31	12.1575	2.02632	5.23227e-34	5.47039e-33	0.0536398	ARPs	0.225571	0.0602629	0.107496	0.0999812	0.0871121	0.115983
CCT4	32.27	2.026	1.84576e-228	1.63758e-226	0.214559	ARPs	0.809633	0.267124	0.274282	0.435145	0.272926	0.299033
SLC1A2	53.996	2.02586	0	0	0.908301	ARPs	3.93361	2.58779	4.36221	2.1344	3.13006	3.86696
JDP2	24.9991	2.02493	6.24992e-138	1.39877e-135	0.333069	WMAs	1.08045	0.481806	0.337106	0.707408	0.390806	0.187304
XPOT	19.9693	2.02434	1.01947e-88	9.87864e-87	0.22839	WMAs	0.737316	0.321504	0.37316	0.330139	0.237456	0.447803
ALDH1L1	46.6769	2.02276	0	0	0.537338	SVZCs	1.7647	1.08962	1.46101	0.784366	1.4296	1.95491
AC097518.2	31.593	2.02268	4.61226e-219	3.68662e-217	0.206778	SVZCs	1.18161	0.170597	1.53105	0.442181	0.910018	0.754396
AC073050.1	41.9182	2.02197	0	0	0.513799	SVZCs	2.02267	1.24544	2.00925	0.961199	0.737455	1.68644
MYBPC1	34.1497	2.02124	1.35148e-255	1.46509e-253	0.274585	ARPs	1.04372	0.373781	0.58335	0.509295	0.870813	0.27877
UQCRFS1	11.65	2.02027	2.29338e-31	2.24929e-30	0.0521073	ARPs	0.212758	0.0568005	0.122774	0.065892	0.0816749	0.132348
GPAM	31.4783	2.01927	1.72331e-217	1.43706e-215	0.216603	ARPs	0.833846	0.278555	0.987407	0.197325	0.886381	0.632866
SUGT1	53.26	2.01877	0	0	0.826593	A0	1.29963	0.422888	0.505832	0.701273	0.463305	0.452465
IFRD1	40.5094	2.01776	0	0	0.452874	ARPs	1.56175	0.657659	0.777745	1.28406	0.84516	0.713267
RBMS3-AS2	8.31181	2.0175	9.42556e-17	6.32564e-16	0.0383142	ARPs	0.157669	0.0413145	0.171122	0.0442595	0.115316	0.26396
WARS	12.0927	2.01682	1.15374e-33	3.46823e-32	0.127676	WMAs	0.45121	0.321662	0.190037	0.234194	0.131818	0.878603
NR2E1	21.2151	2.01675	6.92073e-100	2.38648e-98	0.106331	SVZCs	0.395008	0.105162	0.296155	0.113061	0.123422	0.302935
RPL35A	42.0141	2.01598	0	0	0.704975	A0	1.0986	0.254228	0.401781	0.285953	0.35046	0.405366
RPS4Y1	26.1026	2.01575	3.40441e-150	1.61558e-148	0.14636	ARPs	0.587126	0.180265	0.276329	0.334898	0.18455	0.203238
OLFM2	34.9851	2.01467	3.78456e-268	4.03958e-266	0.271104	SVZCs	0.994424	0.691465	1.00238	0.351702	0.523488	0.985471
AL137009.1	25.6789	2.0144	2.01336e-145	9.20205e-144	0.157088	ARPs	0.640333	0.200531	0.524422	0.307081	0.265313	0.732694
STK17A	26.9302	2.01393	9.7378e-160	4.98236e-158	0.155556	ARPs	0.597341	0.184283	0.376983	0.187504	0.307694	0.399766
COX6A1	16.2097	2.01386	4.31007e-59	2.51288e-57	0.172086	WMAs	0.565274	0.194087	0.217341	0.213321	0.172411	0.264113
CHMP2A	8.47954	2.01324	2.26092e-17	3.55215e-16	0.0586836	WMAs	0.230494	0.107717	0.0959056	0.11321	0.0622361	0.131772
RMND5A	25.178	2.01309	6.97089e-140	4.59734e-138	0.178319	AR2	0.57784	0.178786	0.29108	0.280763	0.272857	0.177125
AL391840.3	20.5479	2.01256	8.04027e-94	2.12589e-92	0.112899	ARPs	0.422093	0.12235	0.222209	0.277798	0.195408	0.219635
EIF1B	21.281	2.01176	1.70444e-100	4.83458e-99	0.117241	ARPs	0.484002	0.143559	0.160298	0.196904	0.129492	0.240799
FAM184A	44.4314	2.01094	0	0	0.559898	ARPs	1.93375	0.903278	1.69365	1.01909	0.994232	1.66973
SNRPF	20.5804	2.01062	4.11306e-94	1.33723e-92	0.11039	SVZCs	0.411027	0.121926	0.15857	0.118813	0.131946	0.176129
STARD13-AS	18.4092	2.00881	1.10836e-75	2.3204e-74	0.101149	ARPs	0.403773	0.116545	0.273087	0.215386	0.219203	0.466971
CHCHD1	9.98124	2.00859	1.84156e-23	1.8123e-22	0.0472808	SVZCs	0.184006	0.0412936	0.0728326	0.0489862	0.0578513	0.0825458
RPS11	19.5582	2.00836	3.51292e-85	3.20693e-83	0.218874	WMAs	0.747578	0.288185	0.361659	0.267225	0.244016	0.356425
ZSCAN23	15.8868	2.00801	7.82682e-57	1.25352e-55	0.0725415	ARPs	0.284089	0.0785185	0.179307	0.120714	0.147499	0.138423
RPS27A	16.9755	2.00772	1.24751e-64	8.10412e-63	0.18636	WMAs	0.644192	0.269457	0.345899	0.280019	0.202864	0.448376
FXYD1	25.5716	2.0072	3.16184e-144	7.72425e-142	0.393339	WMAs	1.22052	0.521671	0.789143	0.503465	0.466413	0.834994
AL121820.2	14.9846	2.00699	9.2563e-51	1.68469e-49	0.0732549	SVZCs	0.29036	0.0337089	0.136548	0.0804919	0.0682216	0.118277
NUPR1	31.7602	2.00679	2.29929e-221	2.94326e-219	0.282095	AR2	0.985334	0.496305	0.247947	0.690098	0.299232	0.34904
FRMD5	27.0363	2.00673	5.53179e-161	1.68331e-158	0.488501	WMAs	1.8867	1.51284	1.59395	1.22355	0.872499	1.39813
AL035681.1	20.3537	2.00668	4.30364e-92	2.12972e-90	0.326157	A0	0.398205	0.118122	0.114865	0.135003	0.126176	0.159491
SAP18	29.8817	2.00657	3.39879e-196	4.28741e-194	0.479488	A0	0.610674	0.107771	0.190175	0.0988572	0.11201	0.18767
DECR1	37.3993	2.00548	4.01117e-306	5.7499e-304	0.332056	ARPs	1.18803	0.449794	0.946484	0.596456	0.800339	0.762755
AL713852.1	15.0884	2.00545	1.93176e-51	2.82874e-50	0.0733078	ARPs	0.287205	0.0796064	0.285129	0.0656085	0.137356	0.187701
SPRED1	41.0017	2.00523	0	0	0.431673	ARPs	1.53465	0.645338	1.35398	0.564051	0.91522	1.54519
TIMM8B	10.7829	2.00361	4.14538e-27	3.66378e-26	0.0498084	ARPs	0.210379	0.0567492	0.110788	0.0641281	0.0607386	0.13368
NDUFA6	25.9158	2.00344	4.41703e-148	3.80216e-146	0.407332	A0	0.488824	0.0788014	0.146024	0.092025	0.0910643	0.16519
TOMM6	14.414	2.00281	4.22604e-47	1.84637e-45	0.145123	WMAs	0.45533	0.126745	0.187706	0.14516	0.134437	0.197004
LHFPL1	7.19068	2.00222	6.44693e-13	4.37831e-12	0.0288149	SVZCs	0.11946	0.0264627	0.159227	0.031182	0.0820281	0.0906342
OMG	22.7527	2.0022	1.34806e-114	5.30808e-113	0.126218	SVZCs	0.465628	0.104503	0.351421	0.138045	0.157409	0.251692
ERH	13.8666	2.00123	1.00956e-43	3.95725e-42	0.128469	WMAs	0.430808	0.13866	0.198289	0.137661	0.126201	0.251896
RPL35A	33.1234	2.00041	1.36834e-240	2.02853e-238	0.328624	AR2	1.0986	0.254228	0.401781	0.285953	0.35046	0.405366
S1PR1	22.5402	1.99973	1.67662e-112	6.49853e-111	0.125406	SVZCs	0.447428	0.132698	0.260228	0.13199	0.194715	0.179867
STOX1	40.5649	1.99909	0	0	0.377638	SVZCs	1.32011	0.603	1.1951	0.522591	0.942	1.18788
NDUFS6	20.1865	1.99907	1.28679e-90	3.26545e-89	0.113921	ARPs	0.450174	0.132989	0.173434	0.121988	0.152466	0.227061
RNF181	8.295	1.99878	1.08585e-16	8.57846e-16	0.0340909	SVZCs	0.148967	0.0496324	0.0592465	0.0394059	0.0362086	0.0871546
LINC01414	7.54974	1.99873	4.36127e-14	2.67727e-13	0.0375479	ARPs	0.184414	0.0494308	0.331238	0.0668994	0.139512	0.167859
CADM1	63.6574	1.99873	0	0	0.904424	SVZCs	3.37219	2.00738	3.19533	2.08465	2.4393	3.27196
RPL27A	28.5479	1.99858	2.98057e-179	1.83979e-177	0.206372	SVZCs	0.742338	0.267939	0.335744	0.243323	0.232088	0.394059
RPL11	22.9689	1.99846	9.53057e-117	1.496e-114	0.326725	WMAs	1.07164	0.440889	0.518871	0.429564	0.392415	0.517165
RMND5A	25.3111	1.99838	2.41366e-141	1.05987e-139	0.154023	ARPs	0.57784	0.178786	0.29108	0.280763	0.272857	0.177125
BAG3	29.0994	1.99835	3.65168e-186	1.39205e-183	0.533703	WMAs	1.70095	0.896229	0.719645	0.846215	0.751918	1.06853
SLC8A1-AS1	11.8613	1.99812	1.88106e-32	1.89747e-31	0.054917	ARPs	0.243424	0.0667162	0.308178	0.0586959	0.0566627	0.371005
HAP1	15.0387	1.99793	4.09514e-51	1.99804e-49	0.120539	WMAs	0.473945	0.206443	0.290509	0.190989	0.141324	0.623864
GARS	29.4003	1.9971	5.44193e-190	3.57539e-188	0.214304	ARPs	0.804304	0.269574	0.221757	0.371684	0.206651	0.287274
GABARAP	17.3668	1.99684	1.47233e-67	1.00939e-65	0.179223	WMAs	0.595393	0.28725	0.276932	0.290852	0.185552	0.297062
HGD	9.10594	1.99564	8.55259e-20	9.80383e-19	0.0613886	AR2	0.226203	0.0108185	0.0733045	0.00756456	0.0143625	0.0617062
RWDD1	21.1916	1.99533	1.14087e-99	3.20718e-98	0.121328	ARPs	0.479993	0.14368	0.237305	0.153272	0.149451	0.330061
CWC15	20.6618	1.99479	7.64333e-95	2.04905e-93	0.111111	ARPs	0.432096	0.127169	0.180221	0.163592	0.134411	0.178792
FMC1	9.31172	1.99468	1.25779e-20	9.38941e-20	0.0454662	ARPs	0.181156	0.0486322	0.0963618	0.0589922	0.0582187	0.109827
ARHGAP29	14.5949	1.99443	3.02822e-48	4.16696e-47	0.0699872	ARPs	0.31597	0.0891611	0.301969	0.0359181	0.108553	0.385887
SESN3	40.8972	1.99375	0	0	0.469732	ARPs	1.63474	0.711237	1.26476	0.858251	0.964558	0.734779
ZNF98	23.2494	1.99328	1.44369e-119	2.38484e-117	0.343378	WMAs	1.60289	0.565627	1.64436	0.20199	0.691382	1.43473
ARHGAP5-AS1	7.89907	1.99324	2.80984e-15	3.92247e-14	0.0689929	WMAs	0.216303	0.0470986	0.107774	0.0962448	0.0588849	0.0683355
TSC22D3	18.0443	1.99203	8.74165e-73	1.76821e-71	0.0819923	ARPs	0.366952	0.105662	0.132719	0.100561	0.385854	0.0605507
CCT5	28.2173	1.99197	3.59054e-175	3.94164e-173	0.439337	A0	0.481643	0.11739	0.144573	0.202548	0.116088	0.1632
RPA3	15.2716	1.99157	1.18184e-52	1.7748e-51	0.0756066	ARPs	0.317155	0.0897038	0.166793	0.150992	0.0979548	0.245366
S1PR1	21.6397	1.9915	7.59165e-104	2.22616e-102	0.118008	ARPs	0.447428	0.132698	0.260228	0.13199	0.194715	0.179867
IDI2-AS1	10.7515	1.99109	5.82835e-27	8.34099e-26	0.0552984	AR2	0.196879	0.0767165	0.121143	0.0486854	0.113536	0.0532906
AL135878.1	12.0988	1.9909	1.07199e-33	1.82202e-32	0.0655298	AR2	0.282404	0.114718	0.194878	0.200056	0.0920728	0.0788988
CNTN1	36.1933	1.99082	7.76294e-287	1.5841e-284	0.561023	AR2	2.16831	2.40584	1.99686	2.43073	3.03329	1.08121
TCEAL9	18.9654	1.99068	3.29598e-80	7.24574e-79	0.101405	ARPs	0.415606	0.121914	0.102501	0.254077	0.0961767	0.118934
CCT4	22.6348	1.99063	1.96856e-113	2.89361e-111	0.260904	WMAs	0.809633	0.267124	0.274282	0.435145	0.272926	0.299033
ARHGEF33	10.8347	1.99023	2.35735e-27	3.40735e-26	0.0562728	AR2	0.193833	0.0790138	0.0979269	0.139065	0.0809963	0.0524373
ISCU	20.08	1.98954	1.10415e-89	3.42296e-88	0.110593	SVZCs	0.419479	0.110283	0.159267	0.123314	0.11878	0.171888
GIHCG	12.5948	1.98879	2.25398e-36	7.31438e-35	0.116574	WMAs	0.402611	0.10424	0.162687	0.176539	0.117692	0.183985
HS3ST5	14.4763	1.9883	1.71009e-47	7.53786e-46	0.159397	WMAs	0.610928	0.193805	0.522267	0.113952	0.192477	0.325529
BRINP3	40.3036	1.98798	0	0	0.431615	SVZCs	1.61327	0.561944	1.5187	0.699727	1.23365	0.888559
ZDHHC11	9.81826	1.98773	9.39534e-23	1.88178e-21	0.0697859	WMAs	0.247579	0.0825112	0.0862323	0.168525	0.0684338	0.0570184
XKR6	33.2405	1.98682	2.79942e-242	2.61053e-240	0.271104	SVZCs	1.07786	0.261981	0.976132	0.398137	0.52673	1.00057
STK17A	27.8992	1.98654	2.72672e-171	1.59242e-169	0.167614	SVZCs	0.597341	0.184283	0.376983	0.187504	0.307694	0.399766
LRRC3B	22.8924	1.98548	5.53349e-116	8.49366e-114	0.274385	WMAs	1.08066	0.533013	1.51868	0.3264	0.399838	1.692
DNAJB1	36.2606	1.98543	6.76377e-288	1.405e-285	0.365895	AR2	1.22312	0.684728	0.251124	1.11912	0.580612	0.473451
ENHO	28.8222	1.98539	1.13035e-182	6.91567e-181	0.207152	ARPs	0.784781	0.263144	0.599844	0.281478	0.388887	0.36036
CHL1-AS1	8.5589	1.9845	1.13948e-17	9.325e-17	0.0377435	SVZCs	0.147479	0.0381151	0.0866808	0.0393711	0.051601	0.139716
PLOD3	15.9651	1.98405	2.2354e-57	1.26091e-55	0.140365	WMAs	0.479918	0.20705	0.13718	0.234396	0.144704	0.140166
SYNPO2	37.811	1.9837	0	0	0.405603	AR2	1.44018	1.19017	1.08823	1.51889	0.888171	0.595818
BANF1	15.0597	1.9834	2.97931e-51	4.34801e-50	0.0766284	ARPs	0.311362	0.0883566	0.101785	0.120738	0.0594319	0.109898
AC083862.3	7.87394	1.98338	3.43647e-15	2.19623e-14	0.0342273	ARPs	0.141998	0.0378598	0.079531	0.100219	0.0702644	0.0922162
EGF	11.8913	1.98294	1.31345e-32	2.17591e-31	0.0764921	AR2	0.290718	0.237671	0.10382	0.345579	0.172868	0.0819025
SQOR	11.5186	1.98285	1.06304e-30	1.02835e-29	0.0515964	ARPs	0.205939	0.0562416	0.0738362	0.0622616	0.0951842	0.0668523
CCT4	40.5563	1.98245	0	0	0.646494	A0	0.809633	0.267124	0.274282	0.435145	0.272926	0.299033
CNTFR	32.7587	1.98186	2.28302e-235	3.32765e-233	0.257491	AR2	0.827723	0.351029	0.568338	0.381199	0.602696	0.282243
IARS	34.1598	1.98128	9.57299e-256	1.04102e-253	0.339208	ARPs	1.22957	0.477997	0.428123	0.544628	0.384715	0.63906
SELENOW	28.1873	1.98097	8.36421e-175	2.93085e-172	0.435369	WMAs	1.28738	0.601785	0.646839	0.747106	0.509543	0.71345
C4orf3	20.0003	1.98094	5.47744e-89	1.3524e-87	0.114176	ARPs	0.433401	0.128769	0.161944	0.12019	0.113963	0.214603
ANKRD35	9.54491	1.98044	1.36221e-21	1.26621e-20	0.0458604	SVZCs	0.173682	0.0536644	0.0968351	0.046947	0.0622104	0.0932784
ZFYVE21	35.3484	1.98035	1.05924e-273	1.15915e-271	0.268263	SVZCs	0.907683	0.331516	0.492305	0.318244	0.4474	0.32585
DCTN6	12.7254	1.97979	4.27533e-37	5.96825e-36	0.0610795	SVZCs	0.238595	0.071054	0.0998618	0.0660839	0.0695853	0.109746
SCML1	14.0852	1.97939	4.68571e-45	7.61702e-44	0.065138	SVZCs	0.250569	0.0920816	0.285637	0.0697252	0.086868	0.551922
PPM1B	40.1091	1.97919	0	0	0.413793	ARPs	1.39826	0.572735	1.01761	0.725078	0.992364	0.885103
ENY2	22.2623	1.97899	8.57591e-110	2.69717e-108	0.133333	ARPs	0.49515	0.150604	0.257442	0.205984	0.201318	0.290213
RPS4Y1	18.1605	1.97868	1.061e-73	8.01874e-72	0.163362	WMAs	0.587126	0.180265	0.276329	0.334898	0.18455	0.203238
HS3ST5	20.9839	1.9774	9.1983e-98	2.54052e-96	0.1341	ARPs	0.610928	0.193805	0.522267	0.113952	0.192477	0.325529
ADGRB3	60.4949	1.97673	0	0	0.923372	ARPs	3.86217	2.5519	3.62676	2.77298	3.46796	3.06469
OST4	20.2005	1.97667	9.68791e-91	3.04139e-89	0.121347	SVZCs	0.456899	0.137408	0.181083	0.137283	0.109786	0.237405
BMPER	19.6555	1.97647	5.18451e-86	1.55446e-84	0.104099	SVZCs	0.465776	0.181322	0.607038	0.140415	0.104962	0.522294
LRRC4C	40.0954	1.97632	0	0	0.528206	SVZCs	1.90134	0.87281	2.11831	0.894976	1.81656	1.55279
LSMEM1	12.2089	1.97578	2.78699e-34	4.78617e-33	0.0674787	AR2	0.229257	0.0969971	0.104534	0.226994	0.101184	0.0634506
PFDN5	26.0178	1.97572	3.11402e-149	1.46376e-147	0.181865	ARPs	0.697434	0.228272	0.358128	0.206631	0.249688	0.402541
OLFM1	11.4477	1.97547	2.41468e-30	2.88448e-29	0.0507305	SVZCs	0.198618	0.0827235	0.153047	0.0543658	0.115417	0.190688
OST4	19.3096	1.97527	4.46151e-83	1.02293e-81	0.117752	ARPs	0.456899	0.137408	0.181083	0.137283	0.109786	0.237405
SELENOK	22.2205	1.97461	2.17742e-109	8.27322e-108	0.131899	SVZCs	0.502043	0.128208	0.174823	0.153508	0.136953	0.177343
AKR1C3	11.4636	1.97437	2.01023e-30	5.3891e-29	0.0983347	WMAs	0.331927	0.0822498	0.169472	0.127844	0.0954712	0.0994746
MIR124-2HG	8.53376	1.97347	1.41671e-17	9.72222e-17	0.0293742	ARPs	0.137899	0.0369593	0.142317	0.0344902	0.0392169	0.0814151
SLC15A2	40.8376	1.97205	0	0	0.440926	AR2	1.35835	0.364786	1.10804	0.654294	0.839919	0.551917
MT-ATP6	38.4909	1.97136	0	0	0.504058	SVZCs	1.89779	1.8445	1.58979	0.89454	1.38937	0.977328
SYF2	14.521	1.97115	8.92294e-48	1.21769e-46	0.0743295	ARPs	0.291907	0.0829212	0.126298	0.102945	0.0890555	0.142823
RPS24	50.1059	1.97107	0	0	0.881001	A0	1.73237	0.457568	0.782566	0.523928	0.626769	0.69451
SNRPF	19.5411	1.97102	4.91198e-85	1.15211e-83	0.108812	ARPs	0.411027	0.121926	0.15857	0.118813	0.131946	0.176129
OSBPL3	27.1371	1.97098	3.59399e-162	2.83353e-160	0.247259	AR2	0.861798	0.643446	0.514637	0.716289	0.772301	0.299216
LINC01896	20.9206	1.97096	3.4764e-97	9.54086e-96	0.116731	ARPs	0.447817	0.134613	0.387235	0.170993	0.214936	0.334498
ADAM33	12.0549	1.97039	1.82762e-33	5.46082e-32	0.0991277	WMAs	0.367838	0.0776667	0.13051	0.26845	0.10747	0.0831839
DPH6-DT	37.952	1.97009	0	0	0.446041	AR2	1.5882	1.17832	1.19419	1.46139	1.32701	0.690208
P2RY12	12.9423	1.9694	2.59618e-38	2.96255e-37	0.0643678	ARPs	0.259798	0.0730247	0.190363	0.162176	0.102492	0.331787
NDUFB1	33.2593	1.96936	1.49783e-242	2.53461e-240	0.547571	A0	0.721192	0.163715	0.238933	0.175373	0.22422	0.22952
CKB	46.0092	1.9692	0	0	0.671266	SVZCs	2.19021	1.10783	1.48696	1.1076	1.36668	1.3703
ST6GALNAC6	36.3124	1.96889	1.03051e-288	2.27697e-286	0.58103	A0	0.694988	0.23389	0.228243	0.320772	0.178982	0.218157
CKB	41.862	1.96872	0	0	0.617114	ARPs	2.19021	1.10783	1.48696	1.1076	1.36668	1.3703
LSM5	18.3233	1.96868	5.38975e-75	1.11824e-73	0.0968072	ARPs	0.373167	0.10936	0.185457	0.135297	0.124441	0.193552
TSPAN7	35.8068	1.9685	8.655e-281	1.09979e-278	0.315453	ARPs	1.20535	0.468368	1.34297	0.412873	0.661185	1.16106
PRR34-AS1	9.77528	1.96765	1.43759e-22	1.90708e-21	0.150422	A0	0.148369	0.032873	0.0400781	0.03578	0.0471987	0.0296612
SS18L2	12.033	1.96671	2.38211e-33	4.01533e-32	0.0655298	AR2	0.232294	0.0581188	0.0851509	0.136642	0.0792327	0.064756
DNAJC19	16.3335	1.96646	5.70116e-60	9.60997e-59	0.0835249	ARPs	0.322127	0.0928066	0.177973	0.114899	0.1488	0.166448
SLC25A5	11.9731	1.96519	4.91822e-33	6.27484e-32	0.0541802	SVZCs	0.223914	0.0651616	0.139516	0.0622922	0.066956	0.135133
POLR2J	19.2344	1.96437	1.90884e-82	4.33362e-81	0.110345	ARPs	0.433555	0.130218	0.152385	0.139793	0.103774	0.159891
CST3	40.6051	1.96433	0	0	0.671264	ARPs	2.48239	1.33792	1.78132	0.9927	1.22631	1.56502
TPP1	29.1513	1.96397	8.03755e-187	5.09731e-185	0.196169	ARPs	0.703963	0.232616	0.403481	0.235533	0.255779	0.301963
AL035681.1	16.8485	1.96395	1.07683e-63	1.92652e-62	0.0998723	ARPs	0.398205	0.118122	0.114865	0.135003	0.126176	0.159491
METTL4	21.074	1.96351	1.37664e-98	3.82964e-97	0.116731	ARPs	0.433424	0.130244	0.255252	0.232601	0.218862	0.228144
DDIT4	38.0507	1.96318	0	0	0.667733	A0	1.10681	0.744345	0.41822	0.547005	0.886568	0.419906
DNAJA4	21.2269	1.96206	5.39015e-100	1.52391e-98	0.121073	ARPs	0.483547	0.148072	0.109261	0.184981	0.136299	0.148511
DNMBP-AS1	6.93306	1.96075	4.11832e-12	2.34704e-11	0.0298851	ARPs	0.12281	0.0330173	0.110873	0.040139	0.218987	0.0636167
RPL24	31.6619	1.96002	5.20863e-220	4.17292e-218	0.257305	SVZCs	0.910084	0.299128	0.415804	0.323215	0.288829	0.480288
RSL24D1	21.2645	1.95933	2.42171e-100	1.32506e-98	0.335758	A0	0.381065	0.0921049	0.112682	0.136057	0.0893474	0.15236
STXBP5	54.6176	1.95876	0	0	0.754058	SVZCs	2.47725	1.20157	2.11411	1.33663	1.96305	1.80108
MRPL21	12.8843	1.95835	5.51476e-38	7.85332e-37	0.0618912	SVZCs	0.234918	0.0579654	0.0904047	0.065919	0.0767139	0.105138
MANF	11.5609	1.95799	6.5025e-31	1.09236e-29	0.182427	A0	0.202807	0.0911314	0.0562572	0.0741866	0.0383299	0.0976685
[truncated: 14,844 more rows]

## Sheet: Extended_Data_Table_3_AR2_marke
names	scores	logfoldchanges	pvals	pvals_adj	pct_nz_group	AR2 vs:	weighted_expr_AR1	weighted_expr_ARPs	weighted_expr_A0	weighted_expr_SVZCs	weighted_expr_WMAs	weighted_expr_AR2
[truncated: 8,364 more rows]

[truncated: 67 more sheets: Extended_Data_Table_3_ARPs_mark, Extended_Data_Table_3_SVZCs_mar, Extended_Data_Table_3_WMAs_mark, Extended_Data_Table_4_module1, Extended_Data_Table_4_module2, Extended_Data_Table_4_module3, Extended_Data_Table_4_module4, Extended_Data_Table_4_module5, Extended_Data_Table_4_module6, Extended_Data_Table_4_module7, Extended_Data_Table_4_module8, Extended_Data_Table_4_module9, Extended_Data_Table_4_module10, Extended_Data_Table_4_module11, Extended_Data_Table_4_module12, Extended_Data_Table_4_module13, Extended_Data_Table_4_module14, Extended_Data_Table_4_module15, Extended_Data_Table_4_module16, Extended_Data_Table_4_module17 …]
