# Supplementary material for: Glial multicellular programs reveal distinct patient stratification in Parkinson's disease
Source: Research Square preprint supplement (doi:10.21203/rs.3.rs-9520754/v1), 2026-04-30
Supplement: Supplementary file 2 [file 3b6f2b778023f8fc54046b96.pdf]

**Supplementary Table 1.** Clinical metadata for all donors included in this study.

**Supplementary Table 2.** Relative frequencies of each cell type stratified by striatal region and condition.

**Supplementary Table 3.** Marker genes defining each astrocyte subpopulation identified by snRNA-seq clustering.

**Supplementary Table 4.** Co-expression modules identified by Hotspot analysis within the astrocyte population.

**Supplementary Table 5.** KEGG Parkinson's disease pathway enrichment scores for each astrocyte subpopulation, reported separately for CN and Pu.

**Supplementary Table 6.** Marker genes defining each microglial subpopulation identified by snRNA-seq clustering.

**Supplementary Table 7.** Co-expression modules identified by Hotspot analysis within the microglial population.

**Supplementary Table 8.** KEGG Parkinson's disease pathway enrichment scores for each microglial subpopulation, reported separately for CN and Pu
